# Supplementary material for: A Detailed Gene Expression Map of Giardia Encystation
Source: MDPI journal article supplement (doi:10.3390/genes12121932), 2021-11-30
Supplement: s1 [file s1]

**Figure S1.** Heat-map showing expression changes through-out encystation of cyclins. Expression changes are in log2 space and capped at -5 and 5 respectively to improve visualization. Upregulation is shown in red, while downregulation is shown in blue. For each gene the unique Geneid (starting in GL50803\_) and the annotated function is given.

**Figure S2.** Heat-map showing expression changes through-out encystation of high cysteine membrane proteins identified in previous work from our lab (Peirasmaki *et al.*, 2020). Expression changes are in log2 space and capped at -5 and 5 respectively to improve visualization. Upregulation is shown in red, while downregulation is shown in blue. For each gene the unique Geneid (starting in GL50803\_) and the annotated function is given.

**Figure S3.** Heat-map showing expression changes through-out encystation of very long chain fatty acid biosynthesis genes. Expression changes are in log2 space and capped at -5 and 5 respectively to improve visualization. Upregulation is shown in red, while downregulation is shown in blue. For each gene the unique Geneid (starting in GL50803\_) and the annotated function is given.

**Figure S4.** Analysis of the presence of DNA double breaks using the antibody H2AX and Aphidicolin as control, **S4A)** Graphs showing the percentage of cells with double breaks during different time points throughout encystation first in a combination with a CWP2 antibody and second only with the H2AX antibody, thirdly a Western Blot showing the detection of the H2AX in cell extracts from different time points during encystation (Aphidicolin, Trophozoites, 3.5h, 7h, 10.5h, 14h, 17.5h, 21h and 24h). **S4B)** Examples of the identification DNA double breaks during cell differentiation at different time points (Aphidicolin, Trophozoites, 3.5 h, 14h, 17.5 h 24.5 h) by immunofluorescence using the H2AX antibody (red). Scale bars represent 20  $\mu$ m.

**Figure S5.** Heat-map showing expression changes through-out encystation of elongation factors, translation initiation factors and ribosomal proteins. Expression changes are in log2 space and capped at -5 and 5 respectively to improve visualization. Upregulation is shown in red, while downregulation is shown in blue. For each gene the unique Geneid (starting in GL50803\_) and the annotated function is given.

**Figure S6.** Heat-map showing expression changes through-out encystation of the top 10 most highly induced VSPs and pVSPs. Expression changes are in log2 space and capped at -5 and 5 respectively to improve visualization. Upregulation is shown in red, while downregulation is shown in blue. For each gene the unique Geneid (starting in GL50803\_) and the annotated function is given.
