# Supplementary material for: A Detailed Gene Expression Map of Giardia Encystation
Source: Genes (Basel). 2021 Nov 30;12(12):1932. doi: 10.3390/genes12121932 (PMC8700996; doi:10.3390/genes12121932)
Supplement: Supplementary file 1 [file genes-12-01932-s001.zip]

Archive with 10 entries (10 files):
- Information supplementary files Rev 1.pdf
- Supplementary figure S1.jpeg
- Supplementary figure S2.jpeg
- Supplementary figure S3.jpeg
- Supplementary figure S4.jpeg
- Supplementary figure S5.jpeg
- Supplementary figure S6.jpeg
- Table S1 Rev1- Differentially expressed gene during encystation.xlsx
- Table S2 Rev 1 GO terms.xlsx
- Table S3 Rev1 - Myb2 regulon.xlsx
