# Supplementary material for: A Detailed Gene Expression Map of Giardia Encystation
Source: Genes (Basel). 2021 Nov 30;12(12):1932. doi: 10.3390/genes12121932 (PMC8700996; doi:10.3390/genes12121932)
Supplement: Supplementary file 1 [file genes-12-01932-s001.zip › Table S1 Rev1- Differentially expressed gene during encystation.xlsx]

## Sheet: Legend
Sheet	Contains
Legend	-
log2 CPM values	Log2 counts per million for all genes, timepoints and replicates
log 2 fold change	log2 fold changes for all significantly DE genes
Column name	Description
Geneid	Uniquie geneid of the gene
Function	Geneid - annotation
T1	mRNA from trophozoites
3.5h	mRNA from timepoint 3.5h
7h	mRNA from timepoint 7h
10.5h	mRNA from timepoint 10.5h
14h	mRNA from timepoint 14h
17.5h	mRNA from timepoint 17.5h
21h	mRNA from timepoint 21h
24.5h	mRNA from timepoint 24.5h
28h	mRNA from timepoint 28h
31.5h	mRNA from timepoint 31.5h
Cyst	mRNA from cysts
T2	mRNA from excysted trophozoites

## Sheet: log2 CPM values
Geneid	T1-0h	T1-3.5h	T1-7h	T1-10.5h	T1-14h	T1-17.5h	T1-21h	T1-24.5h	T1-28h	T1-31.5h	T1-Cyst	T1-Excys	T2-0h	T2-3.5h	T2-7h	T2-10.5h	T2-14h	T2-17.5h	T2-21h	T2-24.5h	T2-28h	T2-31.5h	T2-Cyst	T3-0h	T3-3.5h	T3-7h	T3-10.5h	T3-14h	T3-17.5h	T3-21h	T3-24.5h	T3-28h	T3-31.5h	T3-Cyst	T3-Excys
GL50803_60026	5.34068	5.24252	5.4339	5.46923	5.51065	5.59449	5.64756	5.77913	5.90693	5.91611	6.5178	4.99777	3.94923	4.46583	4.40524	4.24191	4.32853	4.25631	4.67753	4.43064	4.88312	4.85628	5.97378	5.21715	5.17915	5.29574	5.34288	5.20328	5.3825	5.60482	5.69362	5.85406	5.64341	5.83786	4.55549
GL50803_60027	5.28497	4.84659	4.98905	4.96005	5.15026	5.08675	5.04898	4.85488	4.78698	4.79716	3.62552	4.69965	3.89304	4.08834	4.09024	4.10483	4.23718	4.503	5.09189	4.19722	4.65416	5.21947	4.6686	5.13029	4.54252	4.71648	4.85045	4.88237	4.9542	5.15079	5.62072	5.57897	5.33115	4.61557	4.19474
GL50803_60028	7.73087	7.52151	7.47605	7.69729	8.11654	8.22735	8.27825	8.27034	7.85706	7.91505	6.69986	7.25748	6.10027	6.5841	6.6099	6.50094	6.34185	6.47012	7.15319	6.25781	7.16865	7.57081	7.27883	7.18234	6.89248	7.22463	7.63509	7.32683	7.58256	8.0631	8.20519	8.24428	8.63828	7.78666	7.15902
GL50803_8044	10.0852	8.7005	9.18899	9.4806	9.6695	9.79492	9.70261	9.53797	9.54162	9.2819	10.0146	10.0405	9.92339	8.51463	9.00905	9.21585	9.35941	9.55879	9.62708	9.55481	9.58843	9.59403	12.1774	10.2295	8.28332	8.94528	9.22791	9.43231	9.58468	9.61679	9.91586	9.71691	9.69785	13.0773	10.1461
GL50803_16313	7.97859	8.07514	7.83722	7.69264	7.31217	7.05187	6.87132	6.89206	6.82788	6.8341	6.3281	7.89022	6.92797	7.52856	7.19609	6.99422	6.50739	6.45229	6.68099	5.70648	6.15515	6.51613	6.62713	6.91075	7.0954	7.48183	7.22367	6.69854	6.58731	6.65419	6.7733	6.66849	6.61368	6.80567	7.05321
GL50803_95162	11.704	11.862	12.1372	12.0488	11.9786	11.8434	11.7093	11.6403	11.653	11.5429	12.3007	11.5171	10.9886	11.5852	11.529	10.7962	10.6113	10.4992	10.7036	9.70886	10.3334	10.4484	13.6512	10.3984	10.5651	11.1908	11.0117	10.6354	10.4933	10.7727	10.8344	10.7024	10.7006	13.5314	10.3435
GL50803_8038	8.1058	7.9845	7.98832	7.83753	7.88476	7.79519	7.92369	8.06763	8.13741	8.25127	6.99907	7.9607	7.59189	7.77895	7.69174	7.8135	7.73064	7.84654	8.09922	7.62449	7.77227	7.93151	7.09974	7.99534	7.67303	7.75845	7.85109	7.68867	7.81918	7.90174	7.9066	7.80802	7.76813	6.64773	7.73051
GL50803_8037	7.92121	7.76627	7.78264	7.86934	7.73059	7.76401	7.54545	7.50735	7.54363	7.33741	8.76287	7.78999	7.87513	7.68589	7.82089	7.83262	7.94839	7.97442	8.04675	7.82739	7.81091	7.76064	7.79538	7.92798	7.73117	7.58265	7.7189	7.69891	7.81426	7.62182	7.77108	7.77567	7.34299	7.08186	7.64396
GL50803_14615	6.48974	6.32014	6.27315	6.07532	6.13012	6.07903	5.93379	6.0994	5.93917	6.06223	4.86535	6.40075	6.42073	6.32029	6.22133	6.11127	6.2125	6.29657	6.11772	6.21613	6.25851	6.44574	5.62113	6.61979	6.43125	6.3277	6.09592	6.05745	6.1127	6.17552	6.21866	6.62787	6.65263	5.67081	6.39055
GL50803_8035	7.62932	7.60877	7.48387	7.37786	7.25921	7.20129	7.25894	7.25742	7.22246	7.30294	5.76327	7.44908	7.19526	7.61807	7.44425	7.05492	6.81043	6.86751	6.86511	6.82081	7.23518	7.44971	6.65317	7.0748	7.2916	7.33881	7.02151	6.93904	6.89749	7.16621	7.17525	7.75556	7.71186	6.36306	6.95547
GL50803_14614	10.5626	10.5893	10.6612	10.5991	10.2747	10.1615	9.83823	9.55014	9.53391	9.31626	8.13258	10.4346	10.1956	10.6192	10.5665	10.6819	10.5456	10.6658	10.7735	10.1199	10.1325	10.2107	9.21864	10.6303	10.5559	10.6955	10.6717	10.5016	10.4066	10.0981	10.315	10.2057	9.85348	8.51953	10.3325
GL50803_16312	8.2542	7.90113	8.08567	8.02338	7.74584	7.59023	7.24906	6.83571	6.85106	6.74018	4.79094	8.04783	7.84829	7.81857	7.94625	7.37942	7.25705	6.9939	6.90451	6.72715	6.66421	6.55579	5.84739	7.09991	7.07645	7.55552	7.37782	7.22827	6.96895	6.77591	6.89013	6.75556	6.73896	5.98986	7.28743
GL50803_2452	7.65192	7.59114	7.59864	7.61256	7.50775	7.51866	7.54507	7.63032	7.70566	7.7532	7.5943	7.53147	6.8514	7.07514	7.07496	7.06728	6.88003	7.00562	7.52851	6.49982	7.06243	7.44752	7.55813	7.11406	7.01698	7.19539	7.32484	7.06879	7.14971	7.34277	7.44695	7.25962	7.17874	6.49476	7.05645
GL50803_16311	7.72701	7.56859	7.62446	7.57723	7.4724	7.52273	7.382	7.47511	7.43074	7.49517	6.62876	7.50082	6.61347	6.92887	6.86328	6.51078	6.37207	6.46285	6.88969	6.22712	6.55607	6.77609	6.23	6.62191	6.60787	6.73341	6.86651	6.45361	6.50574	6.64759	6.78669	6.65881	6.63976	6.02157	6.59339
GL50803_16310	10.3537	10.4085	10.3867	10.2424	10.0129	9.87684	9.752	9.60625	9.64584	9.51805	8.61848	10.2904	9.03716	9.59371	9.53042	9.42166	9.15956	9.44455	10.2297	8.67717	9.24921	9.96681	8.69833	9.49661	9.33152	9.79857	9.8137	9.10953	9.42766	9.56461	9.90446	9.75827	9.58845	8.02432	9.60204
GL50803_22165	9.34644	9.30813	9.29269	9.22275	9.08018	8.96323	8.94613	8.97421	9.08767	9.08218	7.93233	9.27341	9.12186	9.21755	9.21957	9.15422	9.09528	9.0581	9.23493	8.676	8.79555	8.84077	8.20481	9.12603	9.09038	9.10986	9.09469	8.95882	8.95093	8.78695	8.9669	8.69094	8.54416	7.36304	9.01027
GL50803_12945	7.44157	7.41438	7.3832	7.41015	7.2986	7.23944	7.2533	7.16896	7.18022	7.13724	7.27754	7.25846	7.72896	7.50508	7.46716	7.35065	7.26533	7.22483	7.21178	7.20728	7.14214	7.19725	7.765	7.15179	7.1596	7.24151	6.92967	7.06766	7.1892	7.00578	7.23552	7.5507	7.06943	7.38323	6.9076
GL50803_114498	8.66515	8.85214	8.85395	8.73854	8.52707	8.41983	8.2664	8.05936	7.97919	7.82838	6.82686	8.55176	8.46531	8.73456	8.72684	8.10417	7.97993	7.83532	7.75463	7.75298	7.73835	7.59719	7.52125	7.86511	8.28934	8.54596	8.19137	8.11432	7.95109	7.86155	7.94972	7.81975	7.84613	7.24808	7.80887
GL50803_60030	3.74485	3.78247	3.75599	3.97881	4.12972	3.85759	3.63786	3.52088	2.20382	2.79487	2.14177	3.39631	2.48838	3.70636	3.20588	3.08544	2.47586	2.58349	3.68337	1.64885	2.41775	3.01377	3.9926	2.61852	3.00254	3.43517	3.64522	2.73641	2.87012	2.90699	2.96354	1.85112	2.44997	3.26087	3.03666
GL50803_6702	4.54214	5.02472	5.20835	5.12223	4.8912	4.9088	4.69973	4.70784	4.60949	4.8951	4.6093	4.81046	5.00087	5.07076	5.22724	5.08233	5.04402	4.9305	4.69624	4.8487	4.85141	4.63959	4.24822	4.82328	4.86018	5.16658	5.24596	5.21759	4.72439	4.83038	4.41856	4.55346	4.74716	4.59765	4.70921
GL50803_6700	7.48296	7.28097	7.27843	7.36623	7.58095	7.67415	7.81882	8.01343	8.09204	8.11585	10.7421	7.4589	7.72293	7.34922	7.49985	7.55451	7.77249	7.78538	7.83348	7.94772	7.8462	7.91667	9.37124	7.73084	7.60174	7.37344	7.46272	7.47846	7.5537	7.54299	7.73825	7.64644	7.54437	8.89455	7.50456
GL50803_14278	6.56962	6.63392	6.68597	6.64693	6.55536	6.50606	6.50217	6.52526	6.41328	6.48245	7.17027	6.63712	6.89735	6.88312	6.94982	6.87105	6.78819	6.71952	6.58139	6.60748	6.58045	6.57764	6.07355	6.86963	6.98767	6.92315	6.80247	6.75711	6.55006	6.69826	6.42113	6.30898	6.69679	6.33629	6.66182
GL50803_14277	8.44208	8.61421	8.43739	8.27765	7.80778	7.68267	7.49738	7.36088	7.31486	7.13996	6.77217	8.41551	8.54971	8.771	8.72822	8.33962	8.11069	7.8256	7.59521	7.66041	7.44936	7.32087	6.73206	8.01028	8.62763	8.6635	8.23089	7.92635	7.72337	7.55114	7.61537	7.39174	7.44883	6.80827	8.16236
GL50803_17025	7.16238	7.06631	7.05181	6.97745	6.91861	6.92434	6.96741	6.89848	7.07896	7.01482	6.44831	7.09621	7.42317	7.21793	7.22815	7.2427	7.31643	7.37132	7.18223	7.36569	7.26106	7.21232	6.38007	7.51734	7.33534	7.27178	7.16199	7.23834	7.22114	7.1307	7.17756	7.19208	7.01843	6.24715	7.36971
GL50803_95661	6.53996	6.68941	6.68805	6.66947	6.48171	6.38059	6.32002	6.23326	6.26402	6.30267	5.18197	6.42621	6.69926	6.67251	6.73461	6.46327	6.44241	6.38809	6.27424	6.20505	6.12673	6.19146	5.47864	6.41128	6.51048	6.6703	6.50028	6.49281	6.28617	6.17185	6.0871	5.97535	6.06307	6.0058	6.28485
GL50803_14708	6.39254	6.29754	6.25357	6.18412	6.15263	6.01754	6.06829	5.93571	6.06658	6.0982	5.05682	6.32717	6.49104	6.39531	6.40684	6.21669	6.17519	6.06234	6.0147	6.2106	6.09436	6.23487	5.70885	6.18289	6.32503	6.42127	6.11757	6.05061	6.05131	6.12609	6.05828	6.03064	6.02619	6.2142	6.1484
GL50803_8438	5.9558	5.48176	5.60482	5.7601	6.00705	5.93102	6.13622	6.43286	6.61276	6.75211	5.73086	5.73379	5.50603	5.42151	5.3878	5.32453	5.23321	5.45969	5.66515	5.34547	5.70688	5.80515	5.40175	5.61279	4.95521	5.23161	5.25381	5.26562	5.45699	5.8463	5.80788	5.62097	5.83873	4.32015	5.586
GL50803_17023	5.87146	6.13907	6.17989	6.05965	5.91525	5.85987	5.71473	5.60659	5.63342	5.68046	5.72147	5.99425	5.97278	6.17703	6.1996	6.01678	6.01548	5.84228	5.74366	5.88015	5.86479	5.82693	5.84739	6.0077	6.24838	6.26403	6.23906	6.16477	5.9529	5.93456	5.81977	5.81304	6.00069	6.13359	5.99673
GL50803_95653	7.45331	7.33189	7.4144	7.50385	7.29658	7.22063	7.02203	6.86547	6.80245	6.69145	6.74577	7.50988	7.62318	7.52373	7.74076	7.62409	7.69399	7.43006	7.43511	7.32492	7.29927	7.16875	6.41527	7.71003	7.67337	7.5966	7.73964	7.65074	7.64207	7.38422	7.36736	7.15445	7.01455	6.94801	7.75122
GL50803_8444	10.6209	10.5745	10.6544	10.551	10.2944	10.1115	9.92301	9.68329	9.67459	9.56447	10.1847	10.6256	10.8602	10.7761	10.7393	10.6953	10.5677	10.3555	10.1595	9.90647	9.77043	9.68133	12.1271	10.5218	10.5829	10.7377	10.5232	10.3986	10.058	9.81656	9.91918	9.89134	9.67508	12.4704	10.6164
GL50803_8445	8.84446	8.81863	8.85928	8.8301	8.51713	8.45481	8.23242	8.05219	8.04732	7.84853	9.76284	8.9625	9.0959	8.92581	9.03256	8.99563	8.99054	8.81532	8.74009	8.55601	8.35876	8.14702	8.1019	9.05261	9.13599	9.03981	9.12038	8.93952	8.88706	8.45973	8.57099	8.25839	8.06807	7.81989	9.07364
GL50803_8446	6.58934	6.56164	6.57539	6.49887	6.255	6.09248	5.87259	5.42486	5.51008	5.4032	4.55214	6.70109	7.10641	6.93797	6.64173	6.88391	6.85501	6.90553	6.70504	6.85132	6.58126	6.59915	5.67658	7.30814	6.87954	7.00099	6.89499	6.9617	6.81246	6.60192	6.58338	6.61791	6.5371	5.64486	6.98685
GL50803_8449	5.76388	5.54938	5.54854	5.36471	5.50191	5.5159	5.43494	5.45823	5.4134	5.24164	4.67404	5.44179	5.12194	5.19537	5.00844	5.06396	4.98508	5.06884	5.40775	4.84395	5.04608	5.35492	5.60597	5.18877	5.10021	5.1201	5.13996	5.06762	5.11286	4.9119	5.1204	5.18378	5.02299	4.9945	5.10565
GL50803_113836	4.2332	4.29911	3.96308	4.23748	4.34829	4.32564	3.95738	3.72515	2.56422	3.23657	2.61748	4.0071	2.91253	3.90749	3.65219	3.42318	2.93211	2.83437	3.90856	1.77403	2.94408	3.33579	4.14716	2.86797	3.17425	3.73903	3.81381	3.01456	2.99711	3.37781	3.49541	2.64963	3.17594	3.66819	3.57996
GL50803_60069	3.82226	3.8797	3.6487	3.95076	4.26397	4.17974	3.9104	3.91421	2.80315	3.3788	1.51686	3.35303	3.77362	4.18526	3.87786	3.53413	3.48522	3.30081	3.57975	3.28113	3.66921	3.6052	4.47367	3.30163	3.61573	3.70508	3.65117	3.71941	3.22919	3.46442	3.17828	3.17743	3.6395	3.84062	3.10975
GL50803_23767	5.41561	5.43547	5.31747	5.26345	5.43186	5.1802	5.06623	4.94684	4.67659	4.8313	3.12471	5.1233	3.95382	4.60942	4.5866	4.40974	4.15043	4.39174	5.16532	3.80582	4.43632	5.02357	4.04972	4.79092	4.5154	4.72779	4.83486	4.62751	4.31473	4.81633	4.64129	4.73725	4.98279	3.91003	4.41549
GL50803_29256	5.91289	5.59557	5.59374	5.63526	5.7641	5.72741	5.73914	5.67392	5.51619	5.4376	4.17924	5.64835	5.17789	5.17499	4.97628	5.13999	5.06884	5.41184	5.64764	5.44454	5.58684	5.90195	5.2196	5.53677	5.19254	5.29384	5.35932	5.40438	5.47736	5.76087	5.96926	6.06485	5.92964	4.93389	5.22395
GL50803_10612	7.70123	7.7448	7.9038	7.92626	8.18775	8.27398	8.37465	8.42047	8.46789	8.40748	7.48611	7.60596	7.89494	7.91172	7.93405	8.21263	8.26422	8.48329	8.57601	8.74915	8.69324	8.65084	8.02707	8.28908	8.14316	8.25623	8.3447	8.5359	8.77948	8.74461	8.75627	8.89443	8.76992	7.57019	7.97823
GL50803_15252	8.21527	8.03255	8.18205	8.22388	8.10793	8.21301	8.15316	8.25243	8.21845	8.17333	11.1762	8.16743	8.1821	7.90431	8.02219	8.22095	8.41902	8.46198	8.44991	8.41454	8.26283	8.25212	10.0238	8.29841	7.99665	7.84737	7.91367	8.16664	8.40372	8.14733	8.30311	8.15763	7.85543	9.1513	7.99111
GL50803_101824	6.9834	7.18184	7.2701	7.10508	7.02858	6.91301	6.84906	6.94506	6.89281	6.9634	5.51128	7.04273	7.30969	7.41281	7.49053	7.02727	6.95567	6.68801	6.55857	6.56913	6.67633	6.60152	5.75767	6.66924	7.18086	7.49555	7.19545	6.99947	6.66177	6.6925	6.53659	6.58999	6.81724	6.01932	6.80184
GL50803_10609	7.96191	7.68077	7.79624	7.76891	7.60155	7.59453	7.55846	7.54544	7.508	7.38951	6.80368	7.96849	8.08224	7.79206	7.88694	7.80861	7.75495	7.56929	7.51804	7.48876	7.4476	7.27605	6.67512	7.71799	7.72592	7.80893	7.70431	7.54322	7.44571	7.32262	7.40967	7.38724	7.25432	6.74726	7.82443
GL50803_10608	9.14966	9.38467	9.41877	9.3605	8.98962	8.84863	8.60087	8.35204	8.33812	8.1096	6.19016	9.28221	9.34281	9.49832	9.4687	9.16348	9.07163	8.9554	8.73369	8.60598	8.37163	8.24809	6.68236	8.84022	9.21855	9.54416	9.27634	9.15181	9.00873	8.68933	8.71118	8.54606	8.3616	6.58545	8.92412
GL50803_10606	5.74565	5.69793	5.72549	5.84178	5.95036	5.97394	5.96631	5.87588	6.08933	5.97533	5.58825	5.65579	6.04332	5.86862	5.93379	6.17449	6.35433	6.32357	6.37344	6.43178	6.36529	6.58004	5.93185	6.06294	5.92099	5.78442	5.67469	5.82612	6.05026	6.00023	6.19329	6.36772	6.02948	5.72409	5.65965
GL50803_10605	4.84291	4.74702	4.96173	5.25889	5.5228	5.77672	5.82904	5.90674	6.05612	6.2209	5.25543	4.91337	4.95128	4.88755	5.12408	5.2863	5.53392	5.76033	5.90375	6.00779	6.35118	6.50351	5.9826	5.24498	5.06738	5.15195	5.30376	5.55209	5.7566	6.03603	5.93577	6.22069	6.24401	5.52356	4.87143
GL50803_29252	7.33841	7.32378	7.31937	7.3324	7.47016	7.52679	7.58152	7.58811	7.69323	7.61271	7.08401	7.2894	7.51408	7.48535	7.53891	7.80492	7.92637	8.13621	8.07352	8.18439	8.04123	8.1053	8.32826	7.88853	7.62941	7.45187	7.50809	7.61295	7.907	7.84752	8.01763	7.96815	7.83426	8.33355	7.43871
GL50803_15251	8.6987	8.63934	8.62436	8.47097	8.11854	7.94123	7.79865	7.5893	7.59728	7.46866	6.02432	8.7129	8.85119	8.80289	8.7339	8.86553	8.80858	8.69228	8.62584	8.29994	7.96919	7.83002	6.96666	8.8612	8.74921	8.67578	8.51075	8.51948	8.35098	7.74651	7.90269	7.6351	7.32836	6.05478	8.65279
GL50803_117163	2.08871	1.95783	2.19301	1.92865	1.96474	2.00663	2.03062	2.78152	2.67775	2.74798	2.49048	1.95979	2.39705	2.41827	2.46652	2.1346	2.49852	2.41965	2.0967	1.75391	2.89307	2.70824	2.7633	2.88694	2.38309	2.77222	2.65713	2.27119	2.70983	2.74835	3.22194	2.86171	3.45592	3.04863	2.41922
GL50803_15250	4.40175	3.77655	3.75599	3.91056	3.37872	3.22398	3.09015	3.54069	3.21784	3.65782	4.44204	3.70252	4.72855	4.1606	3.98795	3.51622	3.6153	3.62405	3.3471	2.85949	3.54254	3.07874	5.74389	4.05084	3.60434	4.09848	3.69789	3.5744	3.49203	3.17259	3.26433	3.10035	3.11939	5.52988	3.79467
GL50803_10587	4.2846	4.28247	4.14415	4.00632	4.18318	4.22486	4.24177	4.0215	3.98558	3.96717	3.51022	4.22283	4.29113	4.30636	4.04222	4.3604	4.36289	4.60921	4.48662	4.49268	4.37816	4.58632	3.79296	4.56817	4.34096	4.19947	4.65115	4.49946	4.64903	4.70639	4.96416	4.94258	4.90606	3.96697	4.32323
GL50803_113304	3.42418	3.09908	3.02639	2.87344	3.04507	3.05439	2.97614	3.34426	2.92773	2.94379	4.1017	5.0233	2.63264	2.96568	2.4126	2.46845	2.47586	2.69797	2.58554	2.35774	2.95407	2.93574	4.13665	2.92413	3.07038	3.2747	2.92605	2.91769	3.41613	3.23728	3.64193	3.66766	3.81255	5.848	5.03985
GL50803_113303	5.59769	5.77875	5.81791	6.11882	6.45751	6.60451	6.48464	6.98598	6.71737	7.22889	12.3541	5.61362	4.74186	5.6033	5.50676	5.36512	5.47374	5.60908	6.33914	5.47098	6.04147	6.52282	11.771	5.26867	5.49987	5.6089	6.11649	6.00182	6.20204	6.3875	6.41094	6.65132	6.97298	11.4523	5.3575
GL50803_16363	8.93018	9.75326	9.46162	9.31282	9.22953	9.20827	9.15214	9.07417	9.11123	9.04411	14.0093	8.92142	8.98938	9.71951	9.4656	9.37098	9.3851	9.49511	9.39338	9.37214	9.2435	9.20548	13.3856	9.07138	9.75436	9.54166	9.2577	9.33355	9.43509	9.25764	9.41803	9.31529	9.11246	12.5829	8.65691
GL50803_3755	5.82447	5.96362	5.91193	5.87499	5.9606	5.93984	6.00819	6.2594	6.26675	6.42994	8.5923	5.64087	5.74833	5.99023	5.85512	5.89734	5.8381	5.92335	5.89433	6.11719	6.18514	6.23589	6.79355	5.81693	5.99159	5.71931	5.59515	5.62755	5.897	5.98462	6.00094	6.1838	6.01737	6.15621	5.39891
GL50803_3756	5.42136	5.29944	5.05195	5.29948	5.29489	5.32708	5.35649	5.62526	5.64043	5.73197	8.06732	5.15094	5.48559	5.25871	5.22919	5.35843	5.34213	5.5539	5.58211	5.78543	5.75338	5.88906	7.08205	5.5095	5.28824	4.97096	4.8862	5.12949	5.50357	5.42983	5.7167	5.9861	5.48935	6.55016	5.05658
GL50803_26838	3.65655	3.59307	3.58745	3.39025	3.54449	3.556	3.4337	3.16865	3.30524	3.45669	2.90991	3.56387	3.7891	3.62458	3.61089	3.97973	3.95541	4.25631	3.87612	4.19722	3.9242	4.04684	3.42965	4.21743	3.80685	3.7722	3.66887	3.81934	4.01369	3.95369	3.97108	4.11791	3.86755	3.99462	3.88904
GL50803_16364	7.27151	7.38789	7.47725	7.37997	7.31865	7.2452	7.10731	6.93947	7.03649	6.98732	5.92345	7.41485	7.5429	7.59908	7.53537	7.37694	7.43643	7.30378	7.26911	7.31508	7.25905	7.25361	6.2472	7.27208	7.54958	7.66073	7.47493	7.39094	7.34228	7.2789	7.12773	7.38724	7.33946	6.9326	7.25236
GL50803_2572	5.91289	5.98177	5.91727	6.15614	6.34961	6.4601	6.74043	6.94815	6.9476	7.12352	6.0583	5.91337	5.97841	5.69202	5.76522	6.25498	6.25802	6.39319	6.52671	6.57416	6.70471	6.6784	6.41527	6.23007	5.99922	5.9348	6.12293	6.4053	6.61515	6.55757	6.68569	6.79346	6.82168	6.75132	5.96753
GL50803_16365	7.59325	7.68631	7.72184	7.68159	7.71932	7.73779	7.69468	7.76695	7.73317	7.71622	7.34027	7.45208	7.44532	7.6192	7.65665	7.39583	7.37538	7.35484	7.35939	7.40574	7.49924	7.42672	7.80785	7.32432	7.53951	7.6226	7.55881	7.57494	7.61368	7.51427	7.58469	7.56391	7.60998	8.15361	7.29411
GL50803_94542	8.14051	8.23446	8.19457	8.11531	7.69805	7.5626	7.28035	6.96108	6.99602	6.81147	8.34173	8.28173	8.30092	8.24823	8.5191	7.93531	7.85436	7.43667	7.29081	7.31078	7.12621	7.02425	7.78869	7.64572	8.11131	8.20907	8.05247	7.68573	7.52689	7.21921	7.25929	6.97055	6.98207	8.49231	7.91081
GL50803_23655	5.32848	5.50525	5.59374	5.55557	5.46821	5.41341	5.27352	5.06328	4.95631	5.01086	5.25217	5.26041	5.60556	5.65865	5.90479	5.77966	5.8381	5.56299	5.57708	5.61042	5.50087	5.50431	6.19245	5.49257	5.97398	6.0587	5.90996	5.82879	5.58958	5.67915	5.32281	5.37227	5.56844	7.34256	5.6139
GL50803_3896	6.81734	6.78627	6.93372	6.78755	6.52979	6.55015	6.17451	5.66792	5.79438	5.3602	5.53561	6.65653	7.19623	7.19888	7.13029	7.31095	7.43092	7.47531	7.46813	7.63896	7.18199	7.05283	5.54768	7.25804	7.14787	6.9548	6.77344	6.91164	6.9444	6.64561	7.07363	6.92035	6.45786	5.63318	6.77905
GL50803_26894	5.75327	5.73662	5.63108	5.48301	5.83123	5.67147	5.77499	5.90037	5.75093	5.8477	5.07538	5.72392	4.8318	5.18114	5.15929	5.16128	4.97502	5.32366	5.76448	4.98227	5.53787	5.86427	6.31866	5.43736	5.4078	5.51895	5.63472	5.39542	5.41861	5.81014	5.93796	5.88758	6.15537	6.80306	5.50297
GL50803_60083	6.93864	6.79729	6.74526	6.74327	6.85826	6.83513	7.00368	6.98838	6.96448	7.00138	6.02623	6.82967	6.26892	6.50794	6.38075	6.49714	6.43509	6.49567	6.83589	6.41586	6.80469	6.91602	7.16323	6.80005	6.6809	6.62865	6.6856	6.66461	6.79821	6.99283	7.07214	7.20288	7.266	6.5012	6.59848
GL50803_60084	3.48404	3.44394	3.20013	3.39858	3.34002	3.65822	3.01219	2.95887	2.46649	2.53246	0.936311	3.0529	1.56362	2.44575	2.31311	2.29725	2.02365	2.33727	3.42391	1.92566	2.58134	3.1146	2.91856	2.42449	2.67223	2.61047	2.84532	2.08743	2.28116	2.96756	3.10242	2.76513	3.26802	3.10046	2.88668
GL50803_60085	3.57632	3.58631	3.43683	3.32183	3.43122	3.65492	3.24208	2.92912	2.49155	2.70933	0.936311	3.30841	2.19496	3.35433	2.89785	2.93179	2.73632	3.05663	3.702	2.55672	3.06882	3.5604	2.67892	3.35027	3.61005	3.32772	3.40584	3.12283	2.9884	3.29244	3.42242	3.20224	3.75538	2.84091	3.41096
GL50803_113297	5.14132	5.34623	5.19961	5.18858	4.90717	4.71054	4.42676	4.15174	4.00746	3.87851	3.20781	4.9453	4.47464	4.82876	4.63449	4.50059	4.43514	4.52487	4.70857	3.98484	4.28231	4.25796	3.56118	4.72921	4.88864	4.94211	4.90873	4.62137	4.48537	4.63349	4.41543	3.96687	4.34723	4.18266	4.67109
GL50803_5324	6.39935	6.57023	6.84771	7.04134	7.14485	7.19846	7.23292	7.1492	7.20647	7.08489	8.67251	6.60442	6.74958	6.90432	7.00836	7.10071	7.16356	7.10025	7.24603	7.43645	7.50563	7.43693	7.27644	6.59405	7.0346	7.19079	7.37243	7.53956	7.46898	7.66557	7.38307	7.48609	7.65757	7.38845	6.78129
GL50803_88581	6.99759	7.97256	8.68409	9.15	9.3723	9.7037	9.63865	9.57567	9.61757	9.2486	11.5137	7.05741	7.25779	7.72356	8.27964	8.64361	8.85596	8.93497	9.44059	9.38334	9.29941	9.15794	11.8618	7.07584	8.18656	8.61042	9.15886	9.44887	9.68856	9.5171	9.59729	9.48167	9.14014	12.7073	7.18123
GL50803_5328	7.80206	7.85229	7.74957	7.81047	7.81486	8.09403	8.04257	8.22438	8.05181	8.02436	13.3835	7.79303	7.99622	7.91756	7.79412	8.12893	8.12395	8.14304	8.23651	8.29058	8.07165	8.07035	12.5907	8.10747	8.04935	7.77831	7.74869	7.92136	8.1991	7.9548	8.126	8.23379	7.99052	11.5377	7.74205
GL50803_13896	7.14162	6.90922	7.05262	7.16916	7.23463	7.30393	7.4701	7.61366	7.64971	7.64122	9.39511	7.05572	7.18749	6.91603	7.07278	7.18294	7.18554	7.23244	7.23434	7.31379	7.35687	7.362	8.52689	7.39309	7.21872	7.17538	7.27225	7.29005	7.3976	7.40979	7.42493	7.63016	7.51922	7.87981	7.31513
GL50803_16297	5.64599	5.30769	5.53005	5.6211	5.77139	5.86059	6.09269	6.34169	6.29104	6.33397	7.86672	5.47245	5.48559	5.3138	5.53542	5.59151	5.54621	5.53246	5.62015	5.53577	5.7873	5.8377	7.04741	5.85234	5.53931	5.6043	5.70504	5.8154	5.83034	6.02385	5.95099	6.05581	6.06734	6.38063	5.69927
GL50803_16298	9.91354	9.85427	9.83685	9.7445	9.44261	9.27809	9.15806	9.08658	9.05021	9.00401	9.56709	9.92073	9.31088	9.63374	9.63684	9.5317	9.25777	9.41117	9.58044	8.69245	9.09428	9.20638	9.05147	9.50354	9.54954	9.81474	9.61268	9.33378	9.29964	9.11778	9.37828	9.3674	9.2424	8.2399	9.53794
GL50803_5333	9.52348	9.26815	9.35768	9.28627	9.14547	9.15477	8.99226	8.97694	8.96722	8.94442	13.0911	9.48785	8.64104	9.08499	9.1439	8.88223	8.63108	8.86578	9.17258	8.09347	8.60803	8.77717	11.263	8.90256	8.93299	9.19589	9.1468	8.82147	8.89028	8.79129	9.10874	8.87673	8.67955	10.3092	9.13489
GL50803_16299	7.82285	8.10057	7.9002	7.82522	7.38622	7.26989	7.05534	6.82968	6.80745	6.79657	8.236	8.02071	8.10251	8.21991	8.26877	8.0309	7.89041	7.56326	7.4402	7.28866	7.04793	6.83572	7.31772	7.81339	8.21307	8.22837	7.99515	7.80531	7.47912	7.15834	7.18355	6.89141	6.86225	7.36215	8.02291
GL50803_2830	5.42136	5.24895	5.30393	5.28158	5.12316	5.13954	5.08328	5.22508	5.12994	5.09571	7.72992	5.36579	5.52772	5.16056	5.25048	5.53779	5.57047	5.54781	5.50819	5.54604	5.24631	5.16066	6.69315	5.67685	5.35607	5.33697	5.31317	5.3216	5.51423	5.17117	5.26657	4.98846	5.00526	6.5915	5.37391
GL50803_2833	5.15519	5.18101	5.22569	5.30614	5.27246	5.20967	5.22442	5.18577	5.30978	5.25679	3.19429	5.2348	5.52926	5.30632	5.42742	5.59294	5.68231	5.53246	5.63315	5.6707	5.3138	5.30536	3.28491	5.61989	5.35947	5.35167	5.38454	5.53096	5.36242	5.27923	5.15648	4.88756	4.91558	3.72432	5.359
GL50803_2834	9.4663	9.45804	9.38188	9.20357	9.13942	8.98936	9.14645	9.20318	9.35857	9.28724	8.15761	9.40263	8.4627	9.01593	8.69102	8.47113	8.15815	8.2796	8.45174	7.75076	8.38138	8.60451	7.89693	8.61278	8.4376	8.73516	8.60494	8.37165	8.29624	8.65538	8.67367	8.60751	8.82053	7.06674	8.52233
GL50803_16300	6.37584	6.27984	6.341	6.39655	6.294	6.24152	6.06293	6.0275	6.02105	5.85546	8.04631	6.46823	6.73033	6.43527	6.64466	6.86458	6.94694	6.81076	6.8408	6.85073	6.67256	6.51445	6.69136	6.85044	6.83878	6.66516	7.05499	6.83412	6.75136	6.63831	6.5623	6.29368	6.33551	6.69765	6.84047
GL50803_60090	4.94229	4.30736	4.39457	4.4647	4.31276	4.15897	3.962	3.52088	3.21031	3.06353	2.22391	4.99072	3.52515	3.59421	3.78543	4.00134	3.85363	4.0346	4.95882	3.36313	3.84052	4.20073	3.63769	4.50206	3.78177	3.682	4.34105	4.05167	4.38609	4.47859	4.62512	4.06028	4.00323	2.9579	4.86511
GL50803_113284	6.19624	5.8859	5.92614	5.87946	5.65481	5.50405	5.11471	4.69611	4.76146	4.38084	3.34873	5.97058	3.25484	4.16886	4.03332	4.04363	3.45078	3.86853	5.50289	2.42292	3.914	5.25203	4.96432	4.40672	3.90302	4.54157	4.83486	4.10104	4.38277	4.83503	5.1714	4.68834	4.66769	3.80982	4.81354
GL50803_17058	6.94531	7.11058	7.13519	7.11016	7.03344	7.0009	6.81439	6.69399	6.72598	6.62811	5.99343	7.08026	6.62358	7.19635	7.29346	7.1373	7.34562	6.84035	6.97704	6.61447	6.87275	6.97145	6.03446	7.4404	7.52636	7.47513	7.59128	7.51162	7.4568	7.13401	7.10312	6.39667	6.54709	7.27839	7.38819
GL50803_1890	6.18838	6.29651	6.27315	6.1087	6.23193	6.253	6.45711	6.58849	6.65705	6.73237	6.11142	6.00594	6.24574	6.41021	6.3371	6.46483	6.52198	6.6565	6.55602	6.73037	6.63269	6.61801	6.25207	6.32526	6.26748	6.14564	6.00941	6.03569	6.21982	6.24621	6.39275	6.418	6.29414	6.03272	5.90833
GL50803_17056	10.6808	10.6737	10.75	10.6255	10.3112	10.1376	9.9367	9.87023	9.83624	9.84749	9.26434	10.7126	10.2594	10.716	10.7042	10.1244	9.68166	9.56474	9.57424	8.94589	9.29659	9.29377	9.35518	9.52772	10.0229	10.5121	10.0262	9.65723	9.46443	9.38077	9.54461	9.60024	9.49806	8.32677	9.97027
GL50803_17055	10.7916	11.0489	11.0737	11.0292	10.9274	10.9049	10.8084	10.7484	10.7745	10.7192	9.6287	10.8744	10.8592	11.0597	11.0638	10.8038	10.6774	10.5628	10.5692	10.395	10.597	10.5234	9.39126	10.4644	10.7843	11.004	10.8132	10.7451	10.7186	10.7601	10.7504	10.8579	10.7463	8.85958	10.5324
GL50803_17054	12.0908	12.0156	12.0929	12.13	11.9819	11.929	11.8081	11.697	11.6743	11.5379	10.5517	12.0751	11.3882	11.7974	11.8521	11.9153	11.8821	12.0997	12.3495	11.7504	12.0313	12.387	12.0054	12.0922	11.5817	11.8869	12.0072	11.9306	12.0045	11.9117	12.2161	12.1952	11.8003	10.4084	11.8282
GL50803_17053	11.0382	10.8006	10.8136	10.9283	10.5358	10.2458	10.1658	9.96744	10.0229	9.95862	9.40835	11.4436	10.5918	10.483	10.514	10.3713	10.1165	10.0753	9.94123	9.4253	9.53578	9.41858	9.11974	10.2531	9.84492	10.3059	10.3128	10.2047	9.96423	9.92294	9.91087	9.47076	9.62246	8.44757	10.5428
GL50803_4644	7.00208	7.02877	7.0639	7.14832	6.98157	6.9257	6.94369	6.86939	6.93909	6.85914	6.25347	7.22383	7.06568	7.04514	7.3434	7.32001	7.23445	6.9967	6.79382	6.77973	6.70397	6.66939	6.54012	6.77227	6.84	7.11795	7.09428	6.99056	6.89749	6.74473	6.87824	6.96814	6.84054	6.88661	7.15514
GL50803_91480	8.7101	8.69344	8.7752	8.75505	8.71197	8.70716	8.78323	8.73865	8.74769	8.77071	10.2327	8.59323	8.6076	8.6544	8.88879	8.18526	8.18328	7.99444	7.93177	8.10915	8.32188	8.15968	8.91518	8.07036	8.45793	8.68669	8.52944	8.36086	8.26953	8.41343	8.29546	8.09829	8.48684	8.6846	8.25146
GL50803_91476	7.69412	7.7659	7.82969	7.75601	7.76679	7.71485	7.74375	7.7694	7.76146	7.76385	7.08858	7.64649	7.5222	7.65312	7.79346	7.57375	7.53664	7.56175	7.39894	7.54034	7.60841	7.60627	7.02907	7.35103	7.6266	7.72743	7.62794	7.60013	7.49342	7.57149	7.58015	7.67441	7.68775	7.14697	7.35701
GL50803_17051	6.1357	6.22647	6.45562	6.5465	6.63586	6.67082	6.63021	6.73684	6.68786	6.78733	5.5648	6.01059	5.83042	6.08392	6.2733	5.99216	6.09197	5.95477	6.09323	6.15029	6.3436	6.22055	5.71593	5.61421	5.94038	6.08534	6.22218	6.18156	6.2438	6.38353	6.32177	6.28886	6.36795	5.89033	5.586
GL50803_91504	7.49255	7.76889	7.97812	7.96988	8.1418	8.20402	8.18682	8.05535	8.03219	8.03025	7.32794	7.54956	7.62354	7.76095	7.88663	7.78512	7.88693	7.80627	7.8624	7.97269	8.14679	8.07974	7.3362	7.6575	7.90556	8.07761	8.10461	8.20384	7.94548	8.23794	7.91826	7.89522	8.29795	7.70113	7.57272
GL50803_34357	3.72638	3.64606	3.53279	3.51041	4.03112	3.88595	4.25687	4.57645	4.64622	4.86904	4.01206	3.50576	3.56765	3.59421	3.38454	3.67531	3.56789	3.78293	3.79747	3.83485	4.02714	4.23371	4.70462	3.62335	3.78177	3.54798	3.59672	3.6305	3.52853	3.85179	3.77003	3.97648	4.41593	4.49167	3.47322
GL50803_50010	1.21464	1.05581	1.8196	1.26943	1.88095	1.85417	1.73948	2.25081	1.15982	1.88724	0.999867	1.15723	1.14946	1.62491	1.67606	0.90021	0.829222	0.754999	0.914144	1.09823	1.26468	1.69589	0.928833	0.542122	0.441275	1.21976	1.25007	1.33225	0.836311	0.990866	0.226661	0.326895	1.57648	1.82103	0.635599
GL50803_50011	1.53073	1.46262	1.9365	1.65039	2.25838	2.39401	2.03062	2.13394	1.70095	1.68301	0.726892	1.66171	0.97997	1.36196	1.67606	1.04046	0.965568	-0.00771113	0.996929	0.516285	1.35791	1.12214	0.928833	0.390902	0.841498	1.37175	1.08408	1.17347	0.714864	1.02384	0.969628	0.549432	0.840953	1.86164	0.92199
GL50803_50012	2.76806	2.55088	2.58201	2.44523	2.91417	2.75552	3.04736	3.16013	3.1248	3.33505	2.25029	2.31594	2.51345	2.70647	2.54379	2.22558	2.19988	2.41965	2.3381	2.27542	2.72825	2.86382	3.03629	1.91629	2.30075	2.03163	2.38462	2.31749	2.06626	2.35374	2.40508	2.38656	2.70185	2.36381	2.06951
GL50803_50013	2.57511	3.09908	3.33402	3.25917	3.59796	3.59088	3.6146	3.53412	3.20274	3.41527	1.75651	2.93065	3.02139	3.21757	3.32011	2.83879	2.90692	2.60713	2.89709	2.73155	3.34416	3.12342	2.7633	2.8584	2.76728	3.14567	2.99316	3.2792	2.32333	3.09714	2.41765	2.13497	3.00809	3.04863	2.36053
GL50803_50014	1.55884	1.33934	1.55287	1.30531	1.96474	1.88823	1.69582	1.53991	1.12821	1.39721	0.291768	1.12329	1.35758	1.30309	1.0569	0.616234	0.829222	0.574965	0.780316	0.695793	0.981865	1.08647	-0.19239	1.09242	1.21567	1.34261	1.42693	1.20665	0.215151	0.522119	0.487436	0.134105	1.16216	1.21592	1.24111
GL50803_50015	2.04963	1.91529	1.96431	1.90545	2.32331	2.24429	2.28753	1.84621	1.61234	1.70282	1.22932	2.12329	2.24071	1.96585	1.92743	2.00362	1.43365	1.70997	2.13376	1.62688	1.98304	1.74246	4.24822	1.09242	1.46289	1.87761	1.6572	1.58029	1.08531	0.957123	1.55189	1.44292	1.42472	1.6461	1.6468
GL50803_50016	2.92747	2.70866	2.78272	2.50816	3.40145	3.21506	3.80645	3.80377	4.14807	4.16934	3.64553	2.87053	2.56231	2.52517	2.42627	2.55286	2.3815	2.35133	2.81961	3.267	3.58172	3.58617	3.89623	2.72774	2.48604	2.56072	2.58437	2.66658	2.83169	3.11255	3.15594	3.42231	3.65663	3.6909	3.05158
GL50803_50019	0.496967	-0.0736645	0.454066	0.104424	0.899877	1.46043	1.25907	1.25017	1.02899	1.51393	0.869826	0.254522	0.304251	0.576469	0.65407	-0.0570782	0.755891	0.423471	0.8709	-0.0641631	1.60612	1.3498	0.719482	0.678984	-0.656778	0.682167	0.119057	0.55413	0.215151	-0.0341103	0.336689	-0.171022	0.715748	1.77925	0.467812
GL50803_50030	2.79194	2.57841	2.21632	2.77451	3.09241	3.23725	3.18795	3.04463	2.56422	2.72878	3.42016	2.10601	2.59791	2.88768	2.45323	2.15017	2.11446	1.61991	2.20514	1.7128	2.40324	2.06919	3.18647	1.67577	2.70462	2.13724	2.23421	1.97636	1.98103	2.11452	2.24497	1.74257	2.25375	3.37748	1.72332
GL50803_116477	8.81926	8.63566	8.54026	8.74018	9.19862	9.32637	9.37561	9.56129	8.87426	9.04871	9.89812	7.02847	7.31416	7.99254	7.71906	7.52272	7.46115	7.45632	7.98217	7.55858	8.08279	8.43407	10.4447	7.02645	6.98273	6.90271	7.09755	6.94274	7.2451	7.63088	7.74513	8.02197	8.07446	10.2229	5.42062
GL50803_96616	7.2842	7.22547	7.16695	7.24271	7.14598	7.11524	7.16799	7.14435	7.20363	7.27675	8.35622	7.27159	7.2817	7.06521	7.17398	6.96096	6.91834	6.80821	6.76385	6.93749	6.87275	6.77189	6.94274	6.96698	7.02555	6.90769	6.98076	6.78347	6.96007	6.90707	6.95032	6.75276	6.71735	6.71576	6.96437
GL50803_27836	7.05299	7.19912	7.18034	7.21998	7.18417	7.28993	7.30372	7.42001	7.41732	7.5205	10.8901	7.13346	7.33452	7.21843	7.25664	7.52906	7.63578	7.6744	7.72154	7.89729	7.6589	7.76346	9.91233	7.47096	7.36899	7.22663	7.23213	7.40932	7.65829	7.40158	7.5608	7.81541	7.434	9.71035	7.33317
GL50803_20315	4.57003	4.49597	4.65557	4.62236	4.82827	5.00505	5.1596	5.62835	5.79312	6.09258	9.39308	4.56387	4.83678	4.56938	4.6694	4.9596	5.16934	5.31651	5.24157	5.55334	5.52452	5.59277	8.12201	4.84041	4.58373	4.29004	4.55288	4.76195	5.06396	5.16194	5.15835	5.37409	5.35059	7.89211	4.75094
GL50803_27835	3.29644	3.26918	3.34464	3.29531	3.32424	3.44217	3.5969	3.61109	3.59841	3.96307	7.64798	3.41046	3.60894	3.33242	3.33468	3.77908	3.99976	3.88312	3.85408	3.98915	4.01764	4.13241	6.44751	3.84804	3.63826	3.08537	3.3917	3.46208	3.47343	3.59632	3.31898	3.91779	3.97618	5.69348	3.62054
GL50803_17157	5.63448	5.57523	5.73561	5.69227	5.86433	5.90769	6.24437	6.54991	6.46876	6.78675	9.83907	5.84732	5.97729	5.88502	6.02532	5.98784	6.02917	5.75901	5.73464	5.68936	6.2423	6.28981	8.33861	5.79451	5.96175	6.06652	6.00477	6.0967	5.73594	6.07194	5.82332	6.40649	6.76223	8.05145	5.98415
GL50803_96605	7.8214	7.96931	7.90424	7.81086	7.87633	7.8372	8.02724	8.22029	8.21868	8.46461	11.1953	7.94712	8.00287	8.08226	8.14507	8.05229	8.02915	7.84871	7.79206	7.81864	8.04562	8.17594	10.2899	7.93938	8.32667	8.24274	8.19494	8.12466	7.9974	8.07642	8.08298	8.34378	8.47501	10.2265	8.16129
GL50803_112630	5.25736	4.77999	5.11532	5.26345	5.28065	5.39083	5.3174	5.32937	5.42808	5.35238	5.87342	5.45379	5.46164	4.95841	5.10721	5.4509	5.37311	5.69153	5.69335	5.68006	5.59643	5.61014	6.74422	5.685	4.99285	5.02928	5.36476	5.57451	5.62654	5.71996	5.78137	5.84883	5.62176	6.70325	5.70517
GL50803_10038	6.91912	7.01938	6.94336	6.8908	6.36125	6.20765	5.97775	5.67392	5.64603	5.32388	5.06427	7.04669	7.16888	7.24457	7.25329	7.39746	7.42354	7.45876	7.20744	7.35529	6.58608	6.71682	5.46611	7.22022	7.08365	6.91328	6.86587	6.86952	6.88991	6.42886	6.61238	6.37046	5.98721	4.88548	6.94353
GL50803_15101	6.76401	6.75646	6.63822	6.62491	6.43931	6.31951	6.44067	6.49257	6.5199	6.57335	5.13674	6.9646	7.07728	6.81035	6.77923	6.9872	6.94178	6.9274	6.74825	6.7057	6.55934	6.55661	5.4105	6.98744	6.89424	6.77354	6.57181	6.59973	6.50422	6.27816	6.42502	6.23678	6.14022	4.69637	6.94253
GL50803_10036	5.11789	5.23389	5.19375	4.94591	5.22013	5.18477	5.25483	5.33127	5.40518	5.3382	4.38962	5.119	5.28367	5.13757	5.13661	5.25964	5.41837	5.39157	5.54132	5.59069	5.45413	5.56388	4.50668	5.48326	5.30242	5.13506	5.11003	5.26562	5.49745	5.51056	5.4583	5.67366	5.24315	4.49167	5.36199
GL50803_10034	6.94531	7.0916	7.42943	7.2375	7.22351	7.21029	7.06181	6.91438	6.84985	6.87396	6.59957	6.99659	6.86546	6.95719	7.2159	6.66908	6.67651	6.41595	6.46079	6.64348	6.79361	6.6799	6.15129	6.44846	6.66385	6.99808	6.87162	6.84338	6.54636	6.82585	6.47325	6.46488	6.87694	6.63899	6.49246
GL50803_10033	6.2746	6.21007	6.29247	6.22333	6.20634	6.1992	6.01154	5.93447	6.00591	5.82076	5.356	6.19041	6.15307	6.324	6.28648	6.07503	6.04175	6.11171	6.04298	5.94483	5.89492	5.78582	5.37071	5.95812	6.16356	6.28237	6.28283	6.17634	6.16581	5.8532	6.12305	6.11361	5.79167	5.43551	6.08638
GL50803_15099	7.50705	7.42674	7.53343	7.58318	7.61822	7.69093	7.69121	7.69363	7.80178	7.70061	5.86705	7.47665	7.60907	7.50589	7.45555	7.71096	7.83084	8.01666	8.27797	8.33274	8.28353	8.27111	6.46861	7.90491	7.52712	7.28477	7.43626	7.65112	8.06004	8.11853	8.10865	8.35073	8.05008	6.35775	7.47201
GL50803_17155	6.27354	6.42997	6.41842	6.35863	5.99589	5.97592	5.61569	5.48744	5.55088	5.26181	4.86961	6.33923	6.4199	6.2741	6.40253	6.00077	6.04272	5.84725	5.92637	5.96685	5.72741	5.68061	4.53896	6.0077	6.18285	5.97927	6.02094	5.85519	6.04607	5.66354	5.81977	5.90279	5.51307	4.74602	6.08909
GL50803_10027	5.72564	5.51418	5.55541	5.37529	5.10019	4.85959	4.71621	4.49077	4.60663	4.48174	4.33522	5.91089	5.97729	5.65129	5.69214	5.78092	5.82583	5.71755	5.58043	5.53871	5.26448	5.13033	3.95721	5.89863	5.77867	5.42127	5.41283	5.39901	5.46643	4.98069	5.16022	4.82238	4.72296	3.77835	5.93773
GL50803_17154	5.91561	5.9492	5.80067	5.74548	5.18562	5.07201	4.88611	4.67834	4.70097	4.37468	2.85941	6.09949	6.12996	6.14176	6.09758	6.0689	5.90004	5.66222	5.54648	5.49391	5.07383	5.11492	4.01572	5.96706	6.18093	5.88766	5.70932	5.55209	5.47269	5.14518	5.17326	5.10266	4.74982	3.79941	6.10794
GL50803_13999	6.28831	6.38781	6.48711	6.46159	6.46831	6.45443	6.24248	6.21898	6.11677	6.11954	4.07243	6.41222	6.33281	6.37491	6.33348	6.21484	6.22953	6.01564	6.19317	6.1732	6.24434	6.11719	4.92822	6.16163	6.36863	6.3851	6.4014	6.40262	6.32905	6.36917	6.19238	6.2527	6.31587	5.0261	6.10794
GL50803_13998	8.38262	8.55916	8.70381	8.70682	8.73919	8.73618	8.92072	9.1018	9.19645	9.26076	7.47007	8.42643	7.93462	8.24408	8.2595	7.69612	7.62359	7.57716	7.67044	7.71217	8.03006	8.10725	7.49373	7.23046	7.53201	7.84672	7.6703	7.61488	7.72599	8.11471	8.01918	8.09719	8.26923	6.85301	7.44402
GL50803_17153	11.1306	11.2176	11.2681	11.1492	10.9972	10.8427	10.6806	10.5451	10.6	10.4208	8.95024	11.2068	10.9281	11.2996	11.2359	11.1477	11.1115	11.2062	11.3647	10.7422	10.8872	11.0768	10.2171	11.1514	10.9554	11.0743	10.8519	10.8545	10.8987	10.8046	10.9561	10.8867	10.5909	8.94533	10.9849
GL50803_13996	5.99233	5.87484	5.77931	5.88244	6.1233	6.19863	6.39532	6.52774	6.70202	6.83859	6.52592	5.89965	6.02492	5.85459	5.72015	5.8433	6.07039	6.38296	6.37634	6.46852	6.75557	6.87021	6.19498	6.31654	5.94152	5.8532	5.74452	6.04604	6.30908	6.48617	6.55876	6.84425	6.79999	5.96445	5.93472
GL50803_5649	8.18797	7.98514	7.89975	7.92554	7.55414	7.56523	7.53736	7.54052	7.51336	7.44423	8.93609	8.4364	7.95249	7.7211	7.73013	7.76725	7.66862	7.66247	7.86894	7.4838	7.49241	7.65045	7.44878	8.06959	7.63082	7.615	7.63846	7.57533	7.7654	7.6937	7.79838	7.677	7.4257	6.87673	8.06763
GL50803_5648	6.93663	7.0657	7.06871	7.2135	6.88338	6.87636	6.85342	6.81077	6.83647	6.89725	5.78824	7.04896	6.97723	6.9908	7.02866	6.76193	6.62789	6.60388	6.61781	6.63181	6.64584	6.63508	5.94696	6.6084	6.79245	6.90893	6.81842	6.82614	6.7857	6.68672	6.66672	6.5414	6.53633	6.593	6.76045
GL50803_13995	5.28497	5.66301	5.75364	5.68718	5.69371	5.79703	5.70513	5.55394	5.59202	5.50684	4.25934	5.57647	5.66689	5.72603	5.84626	5.72873	5.81797	5.76559	5.77625	6.00034	6.12009	6.18831	4.45688	5.76149	5.74403	5.959	6.02324	5.98757	5.87472	6.08371	5.7116	5.85536	6.00627	5.29802	5.63387
GL50803_17152	5.80993	5.95577	5.9833	6.04115	6.06278	6.08455	5.96516	5.70058	5.89054	5.70767	4.50363	6.03818	6.03469	6.15743	6.21838	6.05243	6.07793	5.95016	6.13838	6.15221	6.2815	6.29079	4.69749	5.89512	6.10915	6.28429	6.21215	6.19919	6.24654	6.19012	6.09103	6.07496	6.19207	5.87801	6.00824
GL50803_17151	4.61758	4.17389	4.47891	4.37045	4.38678	4.36647	4.32294	4.04943	4.22853	4.04294	3.52109	4.60442	4.74186	4.44215	4.41212	4.60877	4.63753	4.7565	4.55652	4.93837	4.79418	4.81056	3.66719	4.80844	4.45639	4.48934	4.33367	4.4414	4.68989	4.56233	4.84819	4.66771	4.5257	4.12545	4.73947
GL50803_17150	7.92729	7.52372	7.44617	7.33619	7.35015	7.33126	7.50846	7.56612	7.64273	7.62865	6.78801	8.00565	7.64709	7.49566	7.41413	7.49441	7.37959	7.59242	7.60308	7.41338	7.83476	8.05053	7.31655	8.12804	7.50354	7.37434	7.27177	7.43098	7.59193	7.7172	7.94212	8.25148	7.87966	6.71022	8.00099
GL50803_7590	6.35295	6.11695	6.165	6.13511	6.01444	6.0417	5.80098	5.66191	5.6927	5.56074	5.09005	6.47497	5.99742	5.97381	6.0739	5.91794	5.82807	5.82222	5.90375	5.58216	5.70836	5.73057	5.41485	6.03239	5.75567	6.04067	6.0358	5.88111	5.97291	5.79708	6.09004	5.90909	5.65341	5.40836	6.27057
GL50803_14490	6.72034	6.62405	6.8505	6.74409	6.55789	6.52917	6.34939	6.28703	6.29816	6.20623	6.13285	6.77195	6.87818	6.70414	6.8789	6.55457	6.61369	6.42013	6.4248	6.53784	6.45945	6.34557	5.55953	6.53591	6.5526	6.72426	6.64369	6.61217	6.4378	6.45705	6.30156	6.20133	6.2859	6.10216	6.84208
GL50803_7588	10.2412	10.0832	10.0639	10.0547	10.1724	10.203	10.3007	10.4076	10.4508	10.4159	10.6473	10.2591	10.3001	10.0459	10.0714	10.1105	10.1876	10.2833	10.195	10.336	10.3182	10.3814	9.76747	10.3599	10.1621	10.044	10.0317	9.99533	10.1173	10.2035	10.2666	10.3181	10.2027	9.45463	10.2713
GL50803_20307	4.33017	4.3439	4.16226	4.26051	3.95632	4.03779	3.91992	3.67224	3.78734	3.7368	3.57425	4.24273	4.36873	4.27989	4.2978	4.34696	4.38738	4.61797	4.4056	4.51078	4.23394	4.38083	3.65252	4.57696	4.39818	4.30522	4.21418	4.18253	4.44137	4.36417	4.50653	4.47421	4.19526	3.82016	4.46368
GL50803_24555	5.00749	5.03717	5.08715	5.16192	5.24129	5.32708	5.29197	5.11485	5.30801	5.22461	4.17924	5.02789	5.19154	5.07297	5.31435	5.48198	5.67611	5.66081	5.57708	5.70648	5.80258	5.65345	4.4653	5.4817	5.24118	5.29003	5.45254	5.60594	5.62513	5.72247	5.59189	5.70582	5.62902	5.44222	5.45469
GL50803_14488	6.48058	6.3181	6.34893	6.43754	6.41624	6.3766	6.56799	6.67619	6.85891	6.97516	6.16266	6.36579	6.64216	6.40234	6.53144	6.83177	6.97195	7.17331	6.97257	7.19474	6.93963	6.9318	5.99138	6.99784	6.64311	6.5575	6.68777	6.85651	6.9623	6.86105	6.97924	6.89332	6.66044	6.16435	6.82047
GL50803_14487	5.87426	5.95314	6.13931	6.11377	6.23299	6.26007	6.16953	6.03567	6.08625	6.04099	4.67404	6.11144	6.16992	6.02138	6.27425	6.31492	6.45767	6.36401	6.30096	6.44361	6.35872	6.28687	5.44497	6.20384	6.24104	6.35166	6.37917	6.46308	6.38486	6.39697	6.03806	6.10268	6.24872	6.21616	6.28327
GL50803_7579	6.14616	5.97661	5.89938	5.89721	5.86297	5.97526	6.11876	6.49765	6.63332	6.83298	6.93039	6.13718	6.18657	6.04851	5.95987	6.1023	6.00068	5.97762	5.9382	5.90203	5.89232	5.78999	6.37114	5.92868	6.02082	6.11041	5.99662	5.95499	6.06068	5.64379	6.02168	6.10048	5.74704	6.32907	6.16307
GL50803_7578	6.66888	6.66153	6.63282	6.60525	6.35058	6.4435	6.38247	6.4311	6.39181	6.23881	5.15081	6.85445	6.92505	6.68049	6.6534	6.94096	7.08058	7.14383	7.08801	7.3793	6.98112	6.9641	5.6946	7.03018	6.72235	6.39045	6.4014	6.61449	6.90849	6.7552	6.91971	7.03238	6.44312	5.10856	6.6996
GL50803_7577	5.79818	5.72589	5.78905	5.75687	5.52625	5.57022	5.60688	5.82697	5.91274	6.11123	4.92387	5.93065	5.82167	5.76336	5.81802	5.96601	6.03789	6.03319	5.93032	5.96466	5.73177	5.68061	4.77405	6.25126	6.08783	5.96619	6.08607	6.0241	6.00456	5.8125	5.70777	5.56788	5.59387	4.82516	6.15791
GL50803_17149	7.41826	7.43288	7.40872	7.25882	7.03101	6.99082	6.92667	6.82901	6.95438	6.79138	5.94177	7.38919	7.64212	7.69056	7.67179	7.55085	7.58408	7.44735	7.37689	7.47192	7.23978	7.22673	6.07355	7.58822	7.76963	7.67176	7.42719	7.30258	7.34442	7.00887	7.17478	6.90972	6.72346	5.95509	7.62258
GL50803_88245	6.78499	6.94005	7.10585	7.05194	6.96386	6.91163	6.84595	6.68512	6.68583	6.63586	4.72665	6.96699	7.03733	7.05966	7.32025	6.73895	6.69134	6.3413	6.36274	6.26671	6.47688	6.27603	5.17409	6.40224	6.95664	7.14299	6.93394	6.8134	6.42091	6.50308	6.19694	5.83436	6.42407	5.91707	6.71491
GL50803_116713	3.20156	3.01093	2.945	2.78725	2.82729	2.77991	2.69489	2.48697	2.29205	1.92145	0.936311	2.73098	1.46427	1.60067	1.53178	2.22558	1.90993	1.98714	2.62512	1.9612	1.58056	2.50711	2.5263	2.30267	1.77899	2.18728	2.26557	1.79187	1.94547	2.20355	2.46688	2.26624	1.89798	1.6461	2.19574
GL50803_134442	3.54152	3.05078	3.03952	2.97719	2.86049	3.11795	3.02106	2.84663	2.5404	2.19757	1.79285	3.16561	2.25565	2.52517	2.34224	2.43071	2.39364	2.83437	3.17999	3.02817	2.87216	3.30508	3.24633	2.94238	2.6052	2.40026	2.6689	2.52905	3.09771	3.2017	3.47149	3.36487	3.11939	2.2764	2.69098
GL50803_60130	5.20051	4.71017	4.63842	4.54192	4.73588	4.71212	4.40659	4.17305	4.07534	3.90868	3.38489	4.88833	2.56231	3.63058	3.08182	3.44228	3.02867	3.87827	5.23092	2.07912	3.71692	5.11934	4.90983	3.85287	3.27833	3.97573	4.48456	3.58074	3.91144	4.55952	5.0064	4.56307	4.55645	4.32015	4.401
GL50803_50032	5.97549	5.78467	5.54394	5.68548	5.93096	6.01818	5.99023	6.07016	5.42808	5.54574	5.8039	5.0071	5.42248	5.7783	5.54014	5.50487	5.59565	5.40849	5.63799	5.49239	6.01905	5.98662	7.61128	5.13625	5.03378	4.93724	5.10137	4.99824	5.16403	5.28604	5.5511	5.51275	5.61885	6.85678	4.86722
GL50803_50033	4.01213	3.71588	3.82585	3.90472	4.11145	4.23812	4.047	4.33687	3.87089	4.06989	3.61541	2.58896	5.92337	6.13122	6.15412	6.16303	6.14678	6.41009	6.22357	6.56841	6.81363	6.93369	8.05454	5.3219	5.03166	4.8126	5.22617	5.05856	5.14848	5.39244	5.51937	5.82773	5.91903	6.69063	2.70991
GL50803_50036	0.375786	0.487167	0.373414	0.801461	1.09845	0.938965	1.10066	1.31296	0.496835	0.521456	1.92969	0.0528849	-0.872216	0.473444	-0.973685	-0.67176	-1.13311	-0.740116	-0.374274	-1.19973	-0.324144	0.0105266	3.3409	-0.190149	-0.770881	-0.364934	0.0486884	-0.347397	-1.03469	-0.253592	0.282724	0.26545	0.196616	2.77865	-1.31394
GL50803_50039	4.44382	4.4408	4.77419	4.80577	4.77123	4.75582	4.54837	4.15174	3.60417	3.6929	2.44553	4.4034	4.68508	4.63052	4.58356	4.40326	4.26718	4.10268	3.97133	3.91406	3.75169	3.51417	3.16595	3.95525	4.18519	4.64367	4.58742	4.53909	3.78136	3.93648	3.39088	3.00017	3.89187	4.02176	4.00853
GL50803_87706	6.01914	5.70887	5.63541	5.514	5.82843	5.82806	5.623	5.55069	4.78445	5.0616	4.37771	5.4034	3.37596	4.3615	4.14912	4.11676	3.69593	3.71386	5.4561	2.92396	4.22984	5.24598	6.02024	4.32216	4.30268	4.55434	4.89375	4.15304	4.37611	4.83038	5.38496	4.87476	5.02519	4.98073	4.8417
GL50803_50041	2.76806	2.95952	2.16931	1.99606	2.08197	1.88823	1.9769	1.56592	0.885115	0.80416	1.82829	2.30083	1.56362	2.39026	1.76481	1.51941	1.20479	1.22101	1.7835	0.999125	1.47353	1.54638	2.5263	2.0569	2.53489	1.99464	2.15268	1.67818	1.55517	1.26355	2.12741	1.60051	1.28479	2.1178	1.66631
GL50803_2338	7.07201	7.0492	6.86809	6.9444	6.4181	6.33862	6.19426	5.89268	5.92774	5.72715	7.69134	7.02157	7.36453	7.00357	7.01629	7.22122	7.24118	7.24191	7.19598	7.20079	6.80193	6.71244	6.95774	7.40506	7.19375	6.90146	6.93394	6.899	7.02485	6.6026	6.66935	6.44943	6.11254	5.96211	7.15038
GL50803_21198	7.14626	7.01624	7.10351	7.23692	7.29	7.30787	7.33252	7.32895	7.34181	7.35433	7.72933	7.13293	7.3952	7.15065	7.43287	7.3439	7.4176	7.44448	7.44758	7.51104	7.59411	7.54928	7.00183	7.41612	7.31451	7.37883	7.55366	7.60052	7.52425	7.61474	7.58469	7.5943	7.75427	7.11583	7.37639
GL50803_15109	7.86919	8.09403	8.09905	8.03444	7.79568	7.7091	7.60384	7.22309	7.3788	7.24965	7.07573	7.97386	8.20849	8.2475	8.37831	8.24991	8.26958	7.944	7.83277	7.79544	7.69546	7.57524	6.90918	7.9408	8.35245	8.43945	8.49595	8.36546	8.18654	8.00675	7.86072	7.66106	7.76451	7.75602	8.23909
GL50803_10079	6.28831	6.32522	6.32232	6.37349	5.92181	5.84188	5.53436	5.45649	5.52381	5.28006	5.54363	6.22383	6.43965	6.41456	6.58421	6.49104	6.462	6.30653	6.1755	6.1656	5.90911	5.83904	5.42352	6.39315	6.55482	6.52544	6.53287	6.46651	6.41442	6.0511	6.12497	5.93275	5.77869	6.12319	6.42103
GL50803_15110	6.47506	6.36626	6.29931	6.30867	6.25187	6.28956	6.58305	6.97752	7.23643	7.47046	7.54189	6.30083	6.53071	6.42409	6.26667	6.58066	6.52059	6.74903	6.5964	6.6503	6.59728	6.39379	6.83313	6.8316	6.49127	6.3544	6.40051	6.40797	6.52017	6.39932	6.51481	6.34005	6.32662	6.11691	6.53687
GL50803_16376	9.52236	9.5442	9.50722	9.41822	9.12839	8.97524	8.81992	8.60488	8.69067	8.5715	8.0048	9.51909	9.77144	9.73473	9.6725	9.64411	9.48696	9.34309	9.18311	9.06922	8.90064	8.893	8.02778	9.32655	9.56533	9.61605	9.30646	9.15779	8.98293	8.76928	8.86715	8.88169	8.59301	7.47851	9.51719
GL50803_34684	8.49419	8.68536	8.53998	8.36099	8.1234	7.95016	7.75543	7.55967	7.55407	7.45229	6.59186	8.42903	8.65466	8.66009	8.55843	8.14456	7.9617	7.66458	7.54795	7.41177	7.36016	7.31365	6.04574	7.80001	8.31993	8.37186	7.83713	7.63673	7.42367	7.21699	7.21361	7.03353	6.99896	6.00353	7.98481
GL50803_15112	6.38274	6.54168	6.4811	6.52193	6.35932	6.38308	6.59795	6.68066	6.69057	6.59338	7.68108	6.36397	6.69036	6.7337	6.62479	6.32695	6.23122	6.17435	6.18326	6.27291	6.26755	6.27306	6.42826	6.03452	6.30932	6.35349	6.2061	5.95986	6.07412	6.16725	6.15156	6.16814	6.20571	6.70604	6.08275
GL50803_21201	7.32108	7.37814	7.2874	7.18188	7.00279	6.97308	6.93374	6.87915	6.8577	6.76748	7.08401	7.28173	7.41071	7.36324	7.28646	7.23816	7.13357	7.16339	7.01974	7.08121	6.95525	7.0482	6.39338	7.15375	7.25516	7.08148	6.8368	6.6661	6.82841	6.68994	6.78305	6.91973	6.59454	5.848	7.05552
GL50803_15113	6.32764	6.18119	6.23229	6.14752	6.6737	6.70823	7.00647	7.33275	7.27031	7.47118	5.99343	5.9331	5.96825	6.11313	6.05642	5.98024	5.94712	6.22868	6.33715	6.74383	7.18941	7.49972	6.66052	6.27215	5.83948	6.06875	5.96711	6.03914	6.24928	6.93008	6.9114	7.60208	7.61035	6.06569	5.82396
GL50803_10091	10.4242	10.3895	10.3638	10.2093	9.91111	9.78064	9.61301	9.3961	9.43141	9.24755	8.81763	10.2109	9.48325	10.0232	9.81358	9.5222	9.08923	9.19098	9.3145	8.54232	9.04007	9.16089	8.89778	9.13424	9.39584	9.80726	9.49336	9.11828	9.14194	9.15488	9.39408	9.49187	9.25663	8.19293	9.60607
GL50803_16375	7.5593	7.66681	7.66844	7.62593	7.65889	7.62135	7.72249	7.80602	7.82568	7.9169	7.16854	7.48837	7.20875	7.34009	7.28364	7.10321	7.01629	7.0326	6.99036	7.03192	7.12234	7.17354	6.46861	7.03763	7.19849	7.12224	7.12773	7.04203	7.00664	7.20491	7.11234	7.16972	7.15482	6.51877	6.98297
GL50803_16374	7.65884	7.3614	7.40428	7.33511	7.25921	7.17739	7.17248	7.26041	7.3444	7.47551	7.8952	7.51725	7.88026	7.4344	7.46261	7.46515	7.50377	7.43502	7.29439	7.34187	7.24742	7.33613	8.66262	7.67055	7.33362	7.23756	7.19035	7.16531	7.13696	7.12359	7.11668	7.27139	7.12486	8.90309	7.63005
GL50803_16373	6.80493	6.9354	6.93898	6.85795	7.07351	6.97902	6.99638	6.76869	6.87685	6.77159	6.87002	6.69098	6.73434	6.94761	7.06952	6.91044	6.95259	7.04887	6.9713	7.17264	7.26055	7.2864	7.37806	6.85346	6.89131	7.07651	7.07394	7.12303	7.12955	7.29587	7.16549	7.42461	7.42069	7.70672	6.78855
GL50803_114815	10.7819	10.5968	10.5392	10.5822	10.5831	10.5313	10.3054	10.196	10.0959	10.0421	10.727	10.3467	8.58856	9.20755	8.65737	8.62806	8.39752	8.39462	8.94244	7.93995	8.61375	8.89767	11.821	8.95166	8.80302	8.70309	9.10488	8.58345	8.70419	9.19354	9.26586	9.30136	9.21398	11.9818	8.79876
GL50803_39904	7.87444	7.32936	7.41943	7.36304	7.42326	7.41905	7.49579	7.59917	7.70097	7.85656	8.43952	7.91585	7.86968	7.34876	7.47005	7.54865	7.50936	7.64616	7.48705	7.64444	7.6296	7.68141	8.55132	7.81122	7.31713	7.27275	7.3921	7.49534	7.51595	7.63456	7.5913	7.77946	7.72816	8.24711	7.76118
GL50803_134441	4.2332	3.9393	3.94924	3.62132	3.6993	3.73195	3.66642	3.90914	3.80744	3.72716	3.18064	3.8395	3.29875	3.30268	3.11596	3.15653	3.22486	3.70841	3.74454	3.14095	3.81335	3.99969	3.72445	3.46829	3.36868	3.2824	3.23416	3.0424	3.34287	3.56305	3.95823	4.07379	3.79718	2.97651	3.31531
GL50803_116712	2.54732	2.18966	1.99158	1.75788	2.63606	2.52965	2.06535	2.37372	1.91983	1.53618	0.481828	1.53833	0.746197	1.21002	1.28407	0.90021	1.0292	0.988858	1.75998	1.06595	1.16501	1.43735	2.07657	1.18727	1.30287	1.18735	1.11885	1.39117	1.26911	1.2909	1.76369	1.64943	1.28479	1.44698	1.16084
GL50803_114813	6.89037	6.84339	6.71387	6.66084	6.7354	6.68137	6.55201	6.55316	6.32018	6.2978	6.82357	7.16977	5.9431	6.52495	6.35508	6.37163	6.19353	6.52775	6.72339	6.09836	6.39309	6.62113	7.49989	6.661	6.59281	6.70792	6.79644	6.61526	6.60878	6.64229	6.95626	7.01089	6.83554	8.04099	6.87599
GL50803_15867	6.40614	6.52939	6.43714	6.37032	6.1061	5.96333	6.00596	5.95676	5.93461	5.92983	6.23212	6.34569	6.63004	6.65717	6.6084	6.32524	6.23122	5.98214	6.01221	5.78295	5.72304	5.82828	5.57518	6.21138	6.52264	6.59429	6.13359	6.17109	5.90512	5.71366	5.70392	5.64076	5.56239	5.64195	6.26178
GL50803_15868	6.52222	6.80386	6.79159	6.68062	6.74506	6.71813	6.80093	6.8882	6.93966	6.93123	6.08602	6.33368	6.60548	6.88375	6.81864	6.50246	6.33479	6.29839	6.23107	6.24074	6.45066	6.38372	6.11428	6.18768	6.71839	6.77899	6.46272	6.359	6.29679	6.3219	6.24448	6.25072	6.33551	6.31635	6.2801
GL50803_15869	10.5835	10.4626	10.5714	10.5504	10.4395	10.4106	10.368	10.3227	10.3869	10.3355	9.22228	10.4047	10.0438	10.1959	10.2278	10.0501	9.97539	10.0575	10.1804	9.66458	9.84613	10.0112	9.72602	9.96851	9.75702	9.98826	9.92867	9.78786	9.83145	9.79052	10.033	9.93339	9.72103	8.54974	9.89194
GL50803_88735	7.74049	7.80865	7.96184	7.82908	7.7766	7.66682	7.66598	7.70831	7.79676	7.8477	6.67695	7.67056	7.5345	7.64277	7.73974	7.52682	7.46583	7.35178	7.21394	7.17831	7.22491	7.06032	6.9291	7.22768	7.33793	7.62184	7.58973	7.40218	7.28432	7.3317	7.33292	7.4007	7.29044	6.55016	7.33279
GL50803_22850	9.62502	9.62179	9.44383	9.40174	8.88915	8.73676	8.37746	8.20304	8.2229	8.04487	8.9371	9.65709	9.70371	9.47903	9.48736	9.20121	9.16864	8.94471	8.81491	8.72577	8.27956	8.06062	7.81116	9.26333	9.16367	8.98207	8.92522	8.71216	8.655	8.30528	8.38622	8.0344	7.7258	7.06021	9.08705
GL50803_16263	7.57142	7.50636	7.50473	7.52207	7.12564	7.04024	6.83844	6.67768	6.67562	6.72331	9.51229	7.49087	7.76496	7.56777	7.57157	7.78636	7.81936	7.89053	7.74531	7.82227	7.40135	7.33185	8.82398	7.81649	7.47917	7.37659	7.34425	7.41288	7.64103	7.2461	7.41046	7.20083	6.8147	8.21514	7.58846
GL50803_12949	8.01646	8.08986	8.12353	8.05797	7.90347	7.90634	7.81564	7.78298	7.88865	7.73888	6.53265	7.91027	8.12937	8.1407	7.98977	8.04502	8.13303	8.14758	8.22099	8.17236	7.94654	8.01421	6.53412	8.01568	7.99447	7.78577	7.59321	7.65112	7.7273	7.47718	7.54977	7.49448	7.1223	6.11061	7.6316
GL50803_2261	7.23114	7.23739	7.20386	7.08908	7.03707	7.02598	7.09054	7.01813	7.03436	7.00038	7.5512	7.09237	7.37226	7.37311	7.32527	7.28606	7.18117	7.14584	7.06361	7.25773	7.13995	7.13369	6.84286	7.40136	7.43442	7.38778	7.26208	7.18678	7.06889	7.05397	7.21541	7.25666	7.21582	6.65497	7.22589
GL50803_12950	7.11169	6.8915	6.78867	6.80489	6.9232	6.87424	7.25471	7.54339	7.58351	7.69134	6.85506	6.87946	7.05505	6.8667	6.7739	6.83719	6.92411	6.86995	6.95197	7.0444	7.21404	7.33233	6.16169	7.26304	6.98438	6.78035	6.68197	6.77035	6.83874	7.1307	7.0133	7.19415	7.10731	5.57637	6.84796
GL50803_60147	8.50687	8.45071	8.424	8.27821	7.9081	7.80525	7.67549	7.39393	7.54363	7.41488	7.5352	8.13239	8.33954	8.60213	8.46633	8.57408	8.44987	8.61334	8.36771	8.01029	8.05319	8.11114	7.21034	8.20326	8.15395	8.36236	8.05415	7.89774	7.87606	7.47829	7.99945	7.98433	7.68393	6.98524	8.01604
GL50803_16264	8.23528	8.38696	8.22218	8.06942	7.75837	7.67151	7.62436	7.54748	7.61521	7.65431	6.94156	8.30959	8.50959	8.56091	8.51631	8.21217	8.03884	7.87389	7.67359	7.6994	7.66119	7.60706	6.63088	8.04447	8.45079	8.5075	8.06143	7.87824	7.77966	7.66623	7.64107	7.72771	7.63901	6.59902	8.11544
GL50803_16265	11.3727	11.3937	11.4247	11.2992	11.0337	10.8985	10.7123	10.5756	10.5667	10.5167	9.11358	11.3049	10.9299	11.3304	11.2769	11.2224	11.0409	11.106	11.1438	10.5798	10.6345	10.7393	9.87726	11.1891	11.143	11.3706	11.338	11.0554	10.9687	10.7716	10.9739	10.97	10.7042	9.14541	11.2115
GL50803_8415	7.44956	7.73222	7.48207	7.34322	7.08876	6.96213	6.79188	6.73254	6.82788	6.85084	7.37814	7.37303	7.67339	7.85937	7.70651	7.81503	7.74965	7.63039	7.51979	7.34776	7.16704	7.10166	6.94123	7.87969	8.15151	7.91235	7.60245	7.4827	7.31599	6.95487	7.01381	6.8144	6.62895	7.48421	7.75834
GL50803_101739	5.84744	6.12046	6.28146	6.13511	6.08636	5.99036	5.9089	5.72387	5.85719	5.83989	5.12254	5.78219	5.90927	6.19029	6.24659	6.00185	5.91801	5.826	5.62504	5.82214	5.96574	5.96469	5.61357	5.88336	6.23366	6.32397	6.25868	6.2033	6.05652	6.14119	5.9215	5.7791	6.15537	6.87053	5.89702
GL50803_14702	8.87604	9.22336	9.13401	8.99435	8.55332	8.32615	8.1065	7.93388	7.90914	7.86565	6.62499	8.79471	8.36149	8.90895	8.82524	8.28514	8.04751	7.77954	7.8172	7.86071	7.81845	7.58686	6.65685	7.80531	8.43096	8.67048	8.28163	8.10664	8.00605	7.96199	7.87532	7.79415	7.79964	6.87673	7.90441
GL50803_8410	5.88262	5.81391	5.92967	5.97863	6.09336	6.18842	6.39105	6.49511	6.47662	6.44986	5.22915	5.91337	5.75754	5.71901	5.82964	5.68799	5.63835	5.5645	5.68713	5.6477	5.9257	5.82558	5.10031	5.62978	5.88376	5.81525	5.90748	5.74656	6.01103	6.0983	6.04618	6.22069	6.26743	4.98073	5.74587
GL50803_22855	9.70463	9.85567	9.74316	9.52277	9.07503	8.75639	8.40632	8.03599	8.04785	7.8942	6.55795	9.67056	9.59581	9.85473	9.7154	9.47053	9.27386	9.22563	8.94879	8.82148	8.58632	8.56537	7.49064	9.45154	9.46325	9.60612	9.30551	9.00862	8.93671	8.50968	8.67678	8.66385	8.38513	7.33086	9.43851
GL50803_8407	9.77634	9.82036	9.74942	9.67345	9.54751	9.44961	9.45624	9.34373	9.32226	9.15644	7.85978	9.6946	9.74836	9.75787	9.62948	9.31898	9.21041	9.09592	8.99437	8.87851	8.94389	8.97437	8.27176	9.16746	9.40747	9.45846	9.11877	9.01946	8.89887	8.90046	8.93281	9.01965	8.78817	7.57096	9.12391
GL50803_16266	7.20191	7.33794	7.27843	7.27644	7.12564	6.97605	6.90766	7.07415	7.08464	7.07969	5.74252	7.1996	7.35547	7.51403	7.48033	7.59595	7.46547	7.28421	7.21772	6.81293	6.83	6.75211	5.80489	7.38561	7.6128	7.58459	7.36656	7.35763	7.1071	6.78255	6.76163	6.58764	6.65405	6.42534	7.46332
GL50803_8405	8.28293	8.24255	8.25878	8.18498	8.11138	8.08152	8.00812	7.88854	7.92043	7.83569	6.69026	8.11225	7.35503	7.78131	7.58952	7.49594	7.32319	7.36873	7.3793	7.08826	7.30903	7.23235	6.59295	7.46269	7.46309	7.52098	7.59012	7.44017	7.48455	7.49823	7.52238	7.44511	7.36009	6.06351	7.438
GL50803_14699	10.0279	9.95022	9.96655	9.84801	9.52223	9.36618	9.15378	8.93622	8.97307	8.80318	10.3464	9.83844	9.4661	9.85657	9.78054	9.65975	9.52021	9.62603	9.77936	9.14953	9.36288	9.68711	9.95444	9.60715	9.36304	9.51741	9.27007	9.13736	9.03235	8.9952	9.25911	9.27201	8.92602	9.13354	9.42282
GL50803_16267	8.47541	8.08056	8.19641	8.32948	8.15105	8.18517	8.20737	8.3574	8.32053	8.4557	9.70948	8.44651	7.97494	7.8067	8.07168	7.60445	7.43643	7.08561	7.32726	6.63869	6.99932	6.86035	7.6607	7.40012	7.53614	7.7667	7.85721	7.46266	7.28521	7.26216	7.48404	6.94199	7.16134	7.20631	7.97065
GL50803_50045	3.46188	3.69717	3.59636	3.4151	3.61751	3.20609	3.05602	3.0166	2.58765	2.66962	2.57637	3.68517	3.46217	3.89758	3.41228	3.22428	3.07463	3.02188	2.79668	2.73155	2.88265	2.76575	3.16595	3.22172	3.73551	3.48269	3.75977	3.19075	2.72039	2.6672	2.62704	2.38656	2.92567	3.80982	3.42248
GL50803_50046	2.81543	2.90622	2.7351	2.98827	2.99612	2.95078	2.75994	3.09909	2.57599	3.08633	7.41722	3.60749	2.22562	2.88768	2.34224	2.37879	2.1435	1.93207	2.13376	1.60458	2.68092	2.70824	5.89492	2.37161	2.76728	2.52225	2.53375	2.44811	2.82192	2.54759	2.82881	3.07371	3.1439	5.89033	4.09026
GL50803_114121	3.83955	4.11403	3.75599	3.57797	3.71753	3.53107	3.13988	3.05385	2.64462	2.68962	2.67701	3.81313	4.73122	4.96555	4.77733	4.66403	4.59874	5.11696	4.57348	4.51078	5.06002	5.24396	6.04293	3.56567	4.09033	3.80995	3.77074	3.39888	3.03988	3.01753	3.23621	2.89252	3.26802	3.95764	3.59022
GL50803_137605	6.28936	6.03365	5.99346	5.82024	6.00828	5.92283	5.83786	5.68879	5.4554	5.48555	6.87956	6.51234	5.48876	5.46244	5.16338	5.30728	5.12088	5.23543	5.25214	4.77072	4.86206	4.9006	7.20783	5.61136	5.59652	5.48267	5.35568	5.17631	5.28453	5.18763	5.48543	5.36313	5.12089	8.17693	6.46835
GL50803_114120	6.09908	6.03861	5.75563	5.65626	5.69063	5.51862	5.19336	4.83897	4.54811	4.58674	4.41316	5.80378	5.43565	5.8222	5.49869	5.33819	5.16934	5.22782	5.27306	4.81267	4.99378	4.94609	5.25889	5.57674	5.89316	5.55433	5.55922	5.3216	5.14064	5.24294	5.34766	4.9253	5.02078	4.93389	5.53649
GL50803_114119	9.15212	8.98565	9.14031	9.13839	8.9904	8.84014	8.74892	8.65913	8.70815	8.59818	7.46092	9.00827	6.48154	7.34238	7.23835	7.17678	6.83011	7.28192	8.6097	5.97013	7.33554	8.29572	8.40249	7.45437	7.03832	7.70327	8.01259	7.169	7.5463	8.04865	8.25968	7.85244	7.84083	6.94565	7.81189
GL50803_8658	7.63758	7.51796	7.33143	7.30386	7.61862	7.60971	7.92043	8.1449	8.235	8.31076	8.51861	7.27691	7.56142	7.43697	7.32892	7.57844	7.56643	7.81549	7.73893	8.00445	8.05638	8.17143	8.62787	7.7668	7.544	7.30095	7.20002	7.30066	7.60907	7.83654	7.82282	8.06374	7.88875	8.1577	7.31126
GL50803_8657	7.60214	7.54959	7.50532	7.40447	7.71744	7.7245	7.93489	8.22922	8.29562	8.4588	7.76407	7.37484	7.41612	7.57867	7.43836	7.57231	7.59825	7.91204	7.86378	7.66513	8.03536	8.29474	7.82104	7.89265	7.6967	7.4416	7.36385	7.46095	7.50835	7.86269	7.76679	7.9163	8.02088	7.41171	7.39296
GL50803_16114	9.11384	9.10415	9.07944	9.0283	8.77063	8.68382	8.60327	8.37038	8.44882	8.28183	9.54911	8.9798	9.10637	9.33033	9.23846	9.39087	9.41416	9.57171	9.42479	9.37873	9.27559	9.32208	9.27571	9.37878	9.16695	9.10241	8.90638	9.07049	9.05155	9.0031	9.22363	9.39724	9.01866	8.64879	9.06746
GL50803_8654	4.31376	4.91025	4.45461	4.6188	5.40586	5.63433	6.10735	6.17635	6.47662	6.42175	5.27803	4.24273	4.12623	4.79711	4.61374	4.89177	4.75039	5.15554	5.24369	5.64497	5.96574	5.95483	5.46611	4.54746	5.21332	4.84413	4.9309	5.21352	5.6405	6.08078	6.08906	6.45115	6.47728	5.3054	4.37455
GL50803_8652	7.57358	7.63726	7.38126	7.36517	7.4946	7.43498	7.43276	7.36273	7.44324	7.373	8.51386	7.5971	7.8077	7.6945	7.55999	7.75743	7.70985	7.76943	7.6454	7.75267	7.6988	7.67692	8.04193	7.92741	7.91655	7.74807	7.87702	7.81845	7.87635	7.77674	7.88384	7.8648	7.74962	7.9146	7.97335
GL50803_8651	5.37666	5.73814	5.90835	5.8615	6.08869	6.18386	6.30648	6.21796	6.2018	6.27317	6.97259	5.48085	5.57463	5.75652	5.83861	6.0136	5.98973	6.04622	6.19864	6.21888	6.32929	6.48393	6.31633	5.90678	5.89667	6.06763	6.22218	6.08671	6.26469	6.49722	6.1878	6.36498	6.50435	6.05478	5.63263
GL50803_8650	4.20234	3.99142	4.11344	4.46072	3.94605	4.15431	4.01626	3.7706	3.64941	3.62705	4.63954	3.78083	4.25443	3.97505	4.18172	4.19013	4.44392	4.47437	4.51499	4.97142	4.66027	4.63651	4.94035	4.22862	4.23408	4.0132	3.84009	4.15304	4.43818	4.22578	4.49174	4.35759	3.96706	4.54874	3.85543
GL50803_14753	6.90892	6.71288	6.87268	7.39929	7.80032	8.11171	8.37357	8.65232	8.61981	8.62584	7.00296	6.83492	7.15749	6.79707	6.87267	7.38642	7.56409	7.67195	7.91258	7.9943	8.31002	8.34937	7.85908	7.33558	6.91053	6.88765	7.18165	7.9611	8.31072	8.39681	8.598	8.806	8.78136	8.8173	7.03784
GL50803_16113	4.8796	5.01468	5.14295	5.69903	5.96824	6.12259	6.38419	6.62838	6.56117	6.59934	4.09444	5.0071	5.1641	5.19132	5.19367	5.41912	5.42726	5.33785	5.84909	5.83417	6.20828	6.22875	5.16378	4.80844	5.20579	5.08973	5.53046	5.9635	6.26198	6.44492	6.32928	6.61021	6.83303	6.34706	4.86088
GL50803_42048	6.87857	6.91666	6.86625	7.45776	7.71819	7.92799	8.14887	8.28901	8.2401	8.34406	5.6905	6.88643	7.07781	6.95001	7.05089	7.13827	7.13763	7.15339	7.42533	7.56401	7.87606	7.87285	6.26901	6.58754	7.00186	6.97096	7.27562	7.76689	7.7214	8.05116	7.7445	8.04014	8.51529	7.55866	6.78297
GL50803_12795	5.17576	5.03965	5.00253	5.11467	5.39458	5.55175	5.69546	6.0345	6.00483	6.21056	6.61741	4.99777	5.06161	5.14807	5.16134	5.35843	5.34526	5.52628	5.56356	5.58928	5.85549	5.86031	5.78484	5.43253	5.3077	5.20555	5.44057	5.55532	5.59246	5.79828	5.65432	5.85275	5.94017	5.57637	5.14964
GL50803_15897	7.44863	7.50188	7.40682	7.48588	7.6343	7.59195	7.82073	8.01195	8.08743	8.16955	7.02985	7.38293	7.62928	7.57828	7.50911	7.62688	7.68291	7.7323	7.712	7.81894	7.80781	7.78796	7.20028	7.79468	7.82806	7.61233	7.66259	7.77452	7.88694	7.907	7.90632	8.0068	7.91569	6.99668	7.50795
GL50803_15898	5.2466	5.5266	5.50897	5.45533	5.40399	5.42796	5.26607	4.98108	5.02228	4.94793	3.24763	5.24273	5.58057	5.70344	5.72431	5.63642	5.62039	5.5988	5.53094	5.71431	5.55438	5.41187	3.60757	5.29731	5.71518	5.76807	5.74869	5.72811	5.55461	5.59526	5.3043	5.46913	5.4208	4.51094	5.50432
GL50803_102874	5.00749	5.47445	5.50661	5.43117	5.37557	5.26903	5.24918	4.97138	5.24494	5.15622	5.4726	5.25454	5.40416	5.57091	5.76924	5.72873	5.74049	5.65373	5.35968	5.4648	5.51949	5.55738	4.90364	5.56501	5.84796	5.93602	5.84267	5.72525	5.50052	5.68173	5.33777	5.15654	5.58494	5.76212	5.55885
GL50803_25809	7.29416	7.37225	7.41124	7.44173	7.6311	7.57637	7.61304	7.39756	7.62303	7.43537	7.0995	7.28653	7.5059	7.51524	7.5071	7.69711	7.8353	7.83782	7.84609	7.89155	7.77015	7.76346	7.24132	7.72657	7.73803	7.70935	7.81478	7.92198	7.98596	8.02111	7.95996	7.89902	7.8511	7.86428	7.69354
GL50803_60163	7.79136	7.49061	7.57178	7.53865	7.54098	7.47474	7.53697	7.55886	7.61592	7.69876	9.12186	7.71326	8.02918	7.64832	7.79313	7.71227	7.72134	7.57154	7.61377	7.69875	7.66766	7.64778	8.20104	7.82941	7.6273	7.73726	7.62379	7.65601	7.65726	7.69626	7.6673	7.74399	7.76385	8.10476	7.97188
GL50803_16076	7.22348	7.57671	7.69305	7.80774	7.76569	7.96619	7.85835	7.98569	7.85645	7.63221	7.17544	7.23033	5.89503	6.61846	6.60389	6.57274	6.4555	6.74371	7.38363	6.48616	7.33027	7.50268	8.27596	6.39149	6.48507	6.55592	7.00186	6.74446	7.19583	7.53085	7.72187	7.82409	7.60925	8.976	6.31761
GL50803_16077	5.71943	6.08012	6.55038	7.09806	7.39096	7.74903	7.71909	7.63417	7.67146	7.47118	5.90489	5.7699	5.9257	5.87368	6.20358	6.59708	6.65335	6.9449	7.08328	7.36569	7.38898	7.37083	7.97568	6.18672	6.08885	6.31275	6.94064	7.20126	7.46074	7.68213	7.68886	7.85505	7.65828	9.36213	5.86148
GL50803_16078	6.41289	6.60494	7.2701	7.76126	8.0888	8.43046	8.42691	8.35647	8.40105	8.12345	6.26806	6.47665	6.55732	6.4683	6.83282	7.14606	7.31603	7.45916	7.74344	7.93939	8.00985	7.94059	8.22665	6.7433	6.61853	6.82844	7.55485	7.82548	8.00632	8.32897	8.11639	8.15895	8.28859	9.63585	6.54018
GL50803_4463	7.14279	7.05288	7.00405	6.87968	6.65254	6.6507	6.40298	6.05187	6.13279	5.83205	5.66377	7.00652	7.31861	7.00588	6.90415	7.08358	7.17767	7.29925	7.14754	7.3936	6.97929	6.99869	6.27381	7.28241	6.99805	6.82779	6.6302	6.77312	6.95001	6.73107	6.92467	6.95239	6.39543	5.55176	6.92491
GL50803_4465	5.10365	4.86626	4.8838	4.89384	4.9895	5.09041	4.89096	4.63291	4.57767	4.43514	2.92636	4.84732	4.18981	4.08834	4.01986	4.30932	4.30944	4.71088	5.30793	4.09693	4.71416	5.26006	4.98789	4.75782	4.27419	4.50915	4.72069	4.42387	4.85469	5.14705	5.25085	5.13951	5.01193	4.349	4.55288
GL50803_60167	4.15709	4.10932	3.87794	3.90472	3.86112	3.99415	3.71097	3.52751	3.56928	3.11618	1.92969	4.07083	1.385	2.03983	1.98398	2.11887	1.90993	2.30872	4.04126	0.92906	2.6929	4.12803	2.91856	2.89633	2.43549	2.77222	3.58434	2.72501	3.03142	3.66062	3.83709	3.40104	3.45592	2.59815	3.54876
GL50803_114445	3.75095	3.76461	3.72382	3.64951	4.06474	4.01998	3.78577	4.04481	3.36748	3.72231	1.71923	3.55753	0.943545	2.30281	1.98398	1.87837	1.65148	1.96901	3.75052	0.563299	2.41775	3.78284	2.94289	2.24504	1.87697	2.93727	3.11007	2.22335	2.50527	3.21604	3.2291	2.80885	3.53835	2.93905	2.90322
GL50803_50049	6.40032	6.35338	6.18876	6.30092	6.62221	6.59809	6.52653	6.50775	6.0135	6.13238	5.3711	5.93065	6.03036	6.23526	6.13967	6.13592	6.10955	6.01785	6.15425	6.16179	6.48465	6.56554	7.37918	5.82679	6.00031	6.03498	6.18985	6.00418	6.12567	6.12324	6.51554	6.33632	6.32484	6.64918	5.84338
GL50803_50050	1.81338	1.84904	2.07045	2.2565	2.29121	2.54396	2.62676	2.02563	1.49332	1.76066	0.936311	0.940421	2.08221	2.14415	2.14143	1.82117	1.97601	1.4988	1.73608	1.7128	1.47353	1.64775	1.48735	1.41338	2.08809	2.20358	2.50776	2.03296	1.96336	1.73106	1.91326	1.52386	2.11187	2.33526	0.9541
GL50803_60176	1.34949	1.05581	1.58903	0.989649	1.85921	2.32938	2.03062	2.02563	1.09589	1.00896	0.186441	0.48585	-2.70938	-1.69306	-1.96705	-1.54831	-2.08437	-2.70636	0.347467	-3.26925	-1.6548	0.0847125	-1.03081	-2.008	-2.32058	-0.364934	-0.366201	-2.2606	-1.75672	-0.420975	-0.599234	-1.45317	0.625803	-0.717679	-1.47563
GL50803_114891	4.87401	4.73178	4.53561	4.65749	5.21158	5.24952	5.23971	5.22099	4.48712	4.60528	3.74162	3.70826	2.52582	3.44562	3.23724	3.09351	2.90692	3.09892	4.69003	2.15781	3.46084	4.67904	5.20961	3.43646	3.26391	3.67617	4.13148	3.35515	3.55826	4.26078	4.46473	4.27036	4.61607	4.40503	3.48974
GL50803_116575	0.375786	0.00956907	0.287985	1.23263	2.10061	2.57913	2.7493	2.71333	2.76255	2.71909	1.60124	-0.0991207	-0.527332	0.303641	0.0932158	0.318506	-0.766086	0.475756	1.50104	0.516285	1.05793	1.74246	2.03191	-0.450842	-0.27364	0.371873	1.01195	0.916972	1.05226	1.31774	2.09647	2.29728	2.02657	2.21503	-0.00112104
GL50803_50057	3.21045	3.155	3.96996	4.34482	5.19866	5.64599	5.76182	5.94813	5.72739	5.76885	4.01206	3.13186	2.16364	2.69507	2.7535	2.81945	2.67796	2.92178	4.0117	3.06947	4.16251	4.32836	3.9926	2.21534	2.12046	2.91764	3.56556	3.81934	3.94333	4.5454	4.61969	4.38313	4.82248	4.62739	2.60259
GL50803_21232	4.08643	4.10932	4.82815	5.65452	6.3928	6.75704	6.99357	7.10719	6.85348	6.99085	4.86108	3.8858	4.32338	4.26839	4.74769	4.68288	4.95468	4.74589	5.40017	5.60761	6.0356	5.70874	4.76726	3.99075	3.98441	4.49598	5.18166	5.65335	5.62654	6.32851	5.67148	5.54382	6.43155	5.66508	4.02752
GL50803_14841	5.60276	5.26386	5.55541	5.7373	6.04965	6.22107	6.47013	6.64144	6.59914	6.55167	6.2841	5.50741	5.70819	5.46915	5.55577	5.76204	5.79299	6.11377	6.29892	6.37362	6.50772	6.55579	6.36665	5.78316	5.41923	5.56226	5.57338	5.84732	6.16387	6.39224	6.51335	6.79142	6.60046	5.62141	5.67177
GL50803_9030	10.355	10.387	10.3705	10.2728	9.93865	9.71436	9.61219	9.45916	9.51818	9.36903	8.46438	10.5404	10.152	10.3845	10.2708	10.2817	10.1082	10.1232	10.1829	9.55789	9.64617	9.66924	8.81454	10.3146	10.2191	10.3187	10.1806	10.0781	9.94818	9.74405	9.83343	9.67285	9.48343	7.7192	10.3117
GL50803_14842	6.02419	6.14828	5.89578	5.58688	5.63576	5.61836	5.87871	6.02399	6.19228	6.23201	7.51631	6.00594	6.11468	6.17395	5.97854	6.09125	5.93886	6.12711	5.96029	6.16465	6.06586	6.23589	6.97111	6.21044	6.38121	6.21863	5.94912	5.79782	5.84609	5.88607	5.98201	6.10487	5.9355	6.4996	6.19952
GL50803_14843	7.13639	7.20078	7.2104	7.25021	7.18472	7.15279	7.19176	7.42091	7.55853	7.69752	8.33866	7.22783	7.28033	7.36998	7.39297	7.22444	7.21662	7.04509	7.06361	6.99435	6.95897	6.97206	8.90438	6.96419	7.16057	7.18208	6.98959	6.85455	6.78946	6.79335	6.78426	6.75904	6.74698	9.34679	7.16674
GL50803_9036	6.2841	6.16085	6.3034	6.13137	5.97835	5.77748	5.72699	5.58925	5.57892	5.50119	5.93569	6.49004	6.67239	6.34056	6.4493	6.60062	6.5789	6.61557	6.4369	6.38919	6.01548	5.97447	8.0377	6.7799	6.28811	6.40814	6.47787	6.52277	6.31866	5.98147	6.00407	5.61944	5.57145	8.37885	6.49109
GL50803_91398	7.69412	7.80938	7.66949	7.51299	7.26852	7.1446	7.16799	7.16152	7.23689	7.30375	6.71769	7.79707	7.72293	7.8459	7.67179	7.54165	7.33779	7.25225	7.20254	6.94306	6.96516	6.94928	6.02595	7.49974	7.63678	7.61233	7.40051	7.3604	7.16766	6.99231	6.9718	6.96814	6.94245	5.70747	7.53838
GL50803_9038	8.17356	8.24524	8.19787	8.14656	8.00561	7.99772	7.87649	7.76485	7.85404	7.76767	7.39227	8.17185	8.24893	8.28933	8.17978	8.22738	8.27922	8.22981	8.18005	8.3131	8.07823	8.18256	7.40239	8.31097	8.39482	8.28141	8.1497	8.10004	8.13297	8.00107	8.09819	8.23755	7.9363	7.17644	8.18283
GL50803_28703	4.63088	4.71947	4.41989	4.48439	4.46441	4.47129	4.56666	4.74816	4.58351	4.84696	5.29713	4.67349	4.45213	4.52177	4.40178	4.45117	4.62214	4.81094	4.90357	4.67229	4.84337	5.15636	5.24428	4.95492	4.76101	4.69069	4.77618	4.61211	4.57244	4.84429	4.65197	4.77357	5.08548	4.8756	4.52909
GL50803_21233	4.3664	4.02681	4.33193	4.45275	5.14129	5.34966	5.82778	6.37058	6.29638	6.52757	4.88652	4.23082	4.08502	3.84695	4.07296	4.27068	4.50953	4.74855	5.05614	5.208	5.66797	6.02009	5.22457	4.21743	3.78177	3.94697	4.20612	4.7703	5.00689	5.61568	5.72558	6.20236	6.06092	4.87064	4.08665
GL50803_21234	5.67035	5.62722	5.94544	5.93492	6.24874	6.41896	6.99863	7.46131	7.39009	7.79504	5.40671	5.90341	5.68906	5.68339	5.92539	5.70258	5.66864	5.89122	6.15312	6.07016	6.74769	7.0511	6.20004	5.86793	5.78626	6.01895	6.0684	6.35346	6.36734	6.84788	6.74987	7.23579	7.56153	6.15008	5.80208
GL50803_9043	5.39236	5.44672	5.42142	5.64755	5.82843	5.81263	6.01709	6.24034	6.13974	6.37003	5.8172	5.50906	5.61137	5.46915	5.60918	5.56853	5.52567	5.60615	5.59546	5.62434	5.7831	5.90195	6.3644	5.44378	5.61083	5.63468	5.67177	5.9091	5.94505	5.90942	5.89251	6.12014	6.20085	6.48991	5.53251
GL50803_9045	7.61726	7.73719	7.73451	7.73149	7.61174	7.5885	7.51162	7.59207	7.54774	7.48591	7.51359	7.81612	7.69101	7.58872	7.58114	7.71554	7.89202	7.8484	7.90456	7.99269	7.71284	7.66224	9.21864	7.851	7.72065	7.56265	7.5722	7.62144	7.83171	7.61	7.6963	7.45073	7.28495	10.1554	7.69651
GL50803_9046	5.72719	6.54342	7.22053	7.60178	8.05633	8.27478	8.49975	8.72969	8.67383	8.72225	7.71757	5.63335	5.78354	6.15014	6.50431	6.7613	7.00447	7.11424	7.62967	7.73417	7.98693	7.95611	8.80129	5.79451	6.38953	6.84996	7.2737	7.67984	7.96558	8.10872	8.29141	8.35073	8.33479	9.67412	5.71925
GL50803_14845	4.73925	5.53716	6.05617	6.65738	7.0563	7.32013	7.46238	7.74577	7.71533	7.70889	7.08125	4.79976	5.02939	5.25094	5.6226	5.96051	6.08824	6.32535	6.79165	6.97492	7.15843	7.10724	8.40249	4.91621	5.388	5.94937	6.39875	6.80462	7.09498	7.32758	7.24966	7.34238	7.58559	9.13068	4.83093
GL50803_9048	4.85146	4.95556	5.0422	5.45333	5.8657	6.11842	6.18442	6.06447	6.05402	6.04196	4.5836	4.90341	5.13411	5.10563	5.24663	5.42393	5.48371	5.65657	5.94473	6.12896	6.31966	6.24502	4.50668	4.94364	5.10426	5.28429	5.69355	6.0956	6.17735	6.33016	6.24094	6.42505	6.71871	5.51404	5.20406
GL50803_14846	7.37544	7.45995	7.44185	7.46422	7.50644	7.47754	7.43525	7.26885	7.32318	7.28088	6.34961	7.3267	7.7479	7.82054	7.72737	7.73245	7.80239	7.76287	7.65896	7.84385	7.75808	7.73567	6.54012	7.67533	7.96135	7.79656	7.70539	7.74411	7.79223	7.77614	7.72092	7.75067	7.80702	7.11058	7.63346
GL50803_9051	5.79227	5.59557	5.1338	5.14963	5.36017	5.40364	5.19532	5.15825	4.99844	5.09196	5.11179	5.61362	5.59679	5.47749	5.04876	5.39646	5.29437	5.47903	5.71031	5.2391	5.4239	5.40826	4.97615	5.83779	6.03256	5.2116	5.40932	5.38639	5.53531	5.37018	5.63963	5.67661	5.58494	4.78349	5.53516
GL50803_100864	10.0703	10.0717	9.96171	9.89779	9.80222	9.72441	9.71326	9.65885	9.72135	9.6582	8.35318	10.0801	10.0533	10.0785	9.91341	9.96466	9.85134	9.82416	9.85179	9.42669	9.51041	9.48204	8.70635	10.1285	10.0957	10.0987	10.018	9.88587	9.74716	9.63732	9.67447	9.54979	9.51205	8.18645	10.0805
GL50803_91374	6.76023	6.83057	6.84397	6.83512	6.57549	6.41409	6.3263	6.116	6.17884	6.0651	5.13321	6.98601	6.97892	7.04458	7.12139	6.90986	6.81608	6.44083	6.30807	6.09836	6.0921	5.97081	5.47448	6.389	7.05934	7.12546	6.89311	6.74798	6.50727	6.22864	6.20059	5.89521	5.91903	6.1211	6.83509
GL50803_16085	7.5924	7.56773	7.59697	7.54429	7.51211	7.48103	7.47253	7.32277	7.44244	7.31264	6.80256	7.56347	7.66083	7.56621	7.63585	7.62305	7.66643	7.70963	7.63655	7.60671	7.54002	7.59521	7.37136	7.54297	7.44524	7.45144	7.37468	7.42703	7.44372	7.36425	7.52856	7.52594	7.28403	7.05256	7.51738
GL50803_16086	11.1314	11.0985	11.1494	11.066	10.8522	10.7478	10.5617	10.446	10.416	10.2312	9.3315	11.1805	9.91658	10.5336	10.5088	10.4703	10.348	10.6171	11.0622	9.90476	10.4339	10.9846	10.7864	10.6921	10.136	10.5857	10.6594	10.2392	10.3073	10.3668	10.6981	10.557	10.2419	9.39881	10.7207
GL50803_5069	6.82893	6.97412	6.95899	6.97953	7.01636	6.94673	6.86455	6.71303	6.77464	6.67775	7.75949	6.9245	6.81972	7.07843	6.97038	6.92691	6.89024	6.97983	6.98784	6.93078	6.89366	6.92803	7.01048	6.91018	7.03088	7.17228	7.02094	7.05633	7.07404	6.95913	7.11186	7.07105	6.97241	7.43039	7.06841
GL50803_5070	5.08444	4.95818	4.98567	4.98239	4.71486	4.68655	4.40659	4.09033	4.18694	4.09634	2.80707	5.11468	5.22037	5.12701	5.18565	5.05158	5.10804	5.01022	5.00706	5.10651	4.81625	4.69985	3.46367	5.1402	5.27572	5.08093	4.99312	4.90276	4.7683	4.62814	4.73971	4.63771	4.30076	3.96697	5.23869
GL50803_36884	5.7022	5.64685	5.70709	5.99383	6.12444	6.22163	6.16653	6.18056	5.8181	5.99655	4.74994	5.86797	5.76147	5.94882	5.98664	5.87292	5.80667	5.81082	5.91975	6.10929	6.20724	6.19356	5.64356	5.77936	5.76338	5.75292	6.17547	5.99945	6.03237	6.19737	6.07722	5.99204	6.20571	5.34174	5.72973
GL50803_16152	7.25174	7.45671	7.50177	7.5292	7.53113	7.58872	7.47293	7.38208	7.40624	7.35159	5.77468	7.58429	7.48784	7.56425	7.63842	7.65511	7.66987	7.75463	7.83418	7.91354	7.85355	7.76769	6.86371	7.65646	7.89478	7.8291	7.86363	7.87599	7.93362	7.79656	7.83927	7.88313	7.80317	7.12941	7.71156
GL50803_60183	7.13522	7.29711	7.35459	7.39618	7.07763	7.07854	6.83278	6.52111	6.67082	6.39992	4.75916	7.33414	6.96251	7.24604	7.24512	6.58925	6.40017	6.02444	6.3111	6.19482	6.19465	6.00345	5.15859	5.92982	6.70111	7.02699	6.73545	6.58561	6.59163	6.45176	6.54736	6.49782	6.38605	5.68219	6.42318
GL50803_7427	5.00494	5.02971	4.96173	4.6188	5.01921	5.03196	4.97784	4.86801	4.99625	4.89079	4.32905	4.81844	0.906176	2.43207	1.78616	1.5896	0.932671	2.18855	4.42815	0.196616	2.29738	4.08349	3.16595	2.38501	1.98639	2.71651	3.161	1.70164	2.54144	3.30591	3.84176	2.99071	3.36155	2.9579	2.93575
GL50803_113213	6.24895	5.91587	5.99177	6.28416	6.43931	6.51744	6.52184	6.79848	6.54929	6.78964	6.70344	6.29227	5.64153	5.55838	5.71876	5.7557	5.51876	5.71211	5.93427	5.60059	6.0716	6.28097	6.77504	5.88572	5.35267	5.57797	5.80314	5.9635	5.96294	6.12133	6.3581	6.53002	6.62097	7.24232	6.07273
GL50803_14456	7.33689	7.17397	7.19215	7.15017	7.12564	7.09868	6.9777	6.99678	7.02098	6.93803	6.21548	7.27546	7.12889	7.11258	7.15973	7.32688	7.27315	7.52151	7.50262	7.23839	7.3611	7.55907	7.62731	7.45079	7.1015	7.11956	6.9689	7.02295	7.05436	6.93875	7.2693	7.29176	6.89811	6.60352	7.19473
GL50803_14457	8.55193	8.4623	8.53187	8.33871	8.01946	7.87502	7.56568	7.28998	7.31925	7.15577	6.74345	8.67276	8.2937	8.60175	8.57597	8.66865	8.44003	8.60731	8.52789	8.10419	8.09976	7.89137	6.81512	8.52887	8.47543	8.58693	8.49181	8.29489	8.38082	7.80488	8.1805	7.96332	7.66676	6.19049	8.61264
GL50803_7439	9.50474	9.60412	9.55028	9.47335	9.09711	8.98495	8.75026	8.61873	8.66972	8.60181	7.94146	9.67505	9.56851	9.72452	9.72727	9.41876	9.31682	9.11162	9.00987	8.57387	8.5265	8.39382	7.47717	9.27203	9.52858	9.6043	9.44592	9.21637	9.0305	8.7606	8.86528	8.6955	8.46856	7.38671	9.61927
GL50803_14458	7.57272	7.42958	7.43006	7.41221	7.33842	7.28008	7.12182	6.93199	6.97951	6.73898	6.20878	7.59439	7.80991	7.57206	7.5067	7.70108	7.84749	8.02464	7.94584	8.11484	7.75951	7.78274	7.40895	8.00974	7.56986	7.37119	7.33134	7.51162	7.66411	7.47829	7.54046	7.52143	7.18466	7.10741	7.64673
GL50803_60002	5.86444	5.7503	5.71938	5.57407	5.52797	5.5798	5.54516	5.28894	5.38191	5.21775	6.99225	5.84472	6.29626	6.15118	5.83349	6.1563	6.33479	6.53701	6.55089	6.51858	6.47514	6.51109	7.19902	6.57152	6.14794	5.76533	5.52399	5.83012	6.07618	6.02792	6.46873	6.30708	6.02948	6.62874	5.97733
GL50803_7444	9.10791	9.06151	8.94004	8.90143	8.35407	8.17916	7.82295	7.5232	7.48751	7.33304	8.75971	9.32764	8.77291	8.83587	8.84811	8.70056	8.55527	8.39759	8.43049	7.87476	7.80747	7.77471	7.47925	8.83504	8.67386	8.71806	8.70037	8.40688	8.29381	7.89507	8.1212	7.85407	7.49601	7.00123	8.95246
GL50803_24505	7.2295	6.79656	6.95466	6.82434	6.57549	6.36858	6.05431	5.77076	5.79815	5.63865	4.96027	7.28317	7.28352	6.93917	7.14947	6.76573	6.67651	6.55914	6.34508	6.36037	6.23822	6.03537	5.48694	6.71903	6.73286	6.97512	6.79106	6.67131	6.49426	6.2304	6.29306	6.09718	6.03057	5.91466	7.0652
GL50803_13109	5.62951	5.65333	5.80067	5.75037	5.59361	5.55969	5.4823	5.36685	5.38024	5.2484	4.86108	5.65431	5.85146	5.69631	5.75713	5.92814	5.99571	5.99899	6.02583	5.94483	5.69204	5.66709	4.43988	5.83901	5.8407	5.73481	5.69499	5.77311	5.8759	5.56477	5.64899	5.78732	5.46848	4.34184	5.81743
GL50803_15847	7.40477	7.28359	7.48207	7.55969	7.76825	7.811	7.88927	7.78506	7.80678	7.65622	7.94802	7.40296	7.39731	7.21394	7.28692	7.62548	7.78493	7.90103	8.05703	8.06389	8.09045	8.09944	7.71997	7.78208	7.34907	7.3328	7.47661	7.78554	8.08935	8.06706	8.17773	8.14941	7.90915	7.10213	7.4675
GL50803_2732	6.81297	6.67354	6.74125	6.74	6.98534	6.9002	7.00256	6.96108	6.96168	6.77627	7.31473	6.70683	6.58345	6.76948	6.76519	6.89261	6.98905	7.14685	7.36817	7.35404	7.45553	7.57323	7.05998	7.00002	6.61286	6.55195	6.6059	6.87533	7.2076	7.2908	7.41124	7.53491	7.40303	6.32363	6.66121
GL50803_113219	6.7961	7.02565	7.09646	7.05062	6.90143	6.81167	6.68008	6.37794	6.55152	6.4037	6.86149	7.00303	7.09918	7.26207	7.45304	7.07494	7.1149	6.95874	6.92448	6.97926	6.91043	6.90901	6.98728	6.93942	7.28	7.4373	7.38542	7.18418	7.08736	7.0782	6.92797	6.90658	7.06248	7.69272	7.11221
GL50803_15958	6.36295	6.26827	6.37764	6.30978	6.32604	6.30488	6.21567	6.11269	6.1437	6.13055	7.82839	6.44866	6.56559	6.37044	6.52192	6.6105	6.73134	6.73032	6.60467	6.74446	6.66193	6.66939	7.34079	6.65962	6.54443	6.44632	6.6082	6.5277	6.60023	6.61212	6.49715	6.54545	6.4546	6.84291	6.63731
GL50803_103373	9.13967	8.94096	9.12865	9.11045	9.00099	8.848	8.73163	8.71378	8.7183	8.59785	7.55649	9.10044	6.03361	6.97321	6.882	6.72277	6.49336	6.90434	8.50531	5.65043	7.00534	8.18308	8.21046	7.13504	6.6	7.41822	7.69714	6.86042	7.22624	7.79267	8.09697	7.52921	7.58708	6.59451	7.52775
GL50803_14586	6.06763	5.50883	5.6004	5.68548	5.99838	6.10219	6.20598	6.36688	6.10667	6.18965	6.54202	4.15304	4.72049	4.7864	4.49553	4.35033	4.29657	4.58562	4.41316	4.27695	5.3426	5.28977	7.65611	4.96834	4.62662	4.9542	4.76251	4.73945	5.19653	5.30293	5.66622	5.95967	6.26743	8.33941	3.35193
GL50803_13239	2.95946	1.54863	1.96431	1.59348	1.94425	2.10644	2.18071	2.13394	1.5659	1.44504	2.30163	2.38919	2.36986	1.6722	2.05609	2.19589	2.25415	2.6188	2.40026	1.9612	2.58134	3.00424	2.6198	3.0303	1.3308	1.21976	1.6572	1.55474	2.09899	2.34072	2.74149	2.49761	2.23865	2.71358	2.71929
GL50803_102056	6.04421	6.20346	6.32634	6.18653	6.13691	5.92488	5.96055	5.76936	5.8608	5.71866	5.69291	6.00827	6.21072	6.3323	6.45431	6.1053	6.12511	5.99003	5.8712	5.96466	6.12009	6.1238	5.73695	5.95812	6.17805	6.2766	6.00012	6.10443	5.9959	6.07686	5.9292	5.63925	6.02619	6.39454	6.16049
GL50803_17102	5.84317	6.10517	5.91727	6.06881	6.01812	6.00078	5.99136	6.30355	6.42064	6.53243	5.30344	5.93677	5.86856	5.88878	5.70201	5.7946	5.72136	5.77083	6.00222	5.99069	6.05314	6.22466	5.6802	5.81693	5.63483	5.6703	5.5608	5.63213	5.66803	5.66615	5.70007	5.77221	5.67319	4.67943	5.67056
GL50803_17103	5.63117	5.5615	5.72346	5.79523	5.78874	5.8015	5.71883	5.59558	5.5359	5.42125	3.72291	5.70683	5.43072	5.3506	5.43251	5.37011	5.40644	5.60615	5.68088	5.75791	5.73322	5.75065	4.91598	5.42606	5.32516	5.3626	5.22218	5.42744	5.65295	5.62645	5.77405	5.88631	5.62757	4.56728	5.37835
GL50803_2461	6.06641	5.98948	6.10225	6.03849	6.12671	6.23988	6.24626	6.10384	6.07075	6.01647	4.77286	6.07971	6.28539	6.14805	6.17046	6.24324	6.37207	6.38553	6.42199	6.62559	6.51617	6.56797	5.15339	6.25856	6.1499	6.17487	6.11864	6.11101	6.27099	6.47056	6.31423	6.45718	6.44805	5.33454	6.13883
GL50803_17104	4.02226	3.69088	4.20949	4.10632	4.63398	4.73881	4.92918	4.82288	4.78951	4.64421	4.32285	3.83427	4.02963	3.91734	4.01534	4.26354	4.3536	4.70815	4.97423	5.02068	5.20926	5.30148	4.29622	4.17176	4.07803	4.04973	3.93092	4.41325	4.56073	4.92068	5.03116	5.13951	5.09598	4.11709	3.88071
GL50803_102051	5.63942	6.82771	6.89	6.95574	7.39096	7.48196	8.00253	8.41018	8.69405	8.81475	7.57617	5.84992	5.92103	6.73926	6.80366	7.04403	7.17019	7.22912	7.24814	7.46071	7.72164	7.82055	8.37314	6.16066	7.13109	7.12652	7.17237	7.22777	7.31729	7.69402	7.45269	7.61137	7.76154	8.87019	5.92057
GL50803_3647	5.31	5.55112	5.35471	5.40867	5.75678	5.83462	6.58454	7.27626	7.79958	7.98698	6.9795	5.21681	5.56117	5.47916	5.44095	5.47427	5.6358	5.70665	5.72253	5.91908	6.38665	6.5468	7.0446	5.53677	5.82114	5.64665	5.59206	5.63061	5.72156	6.07489	5.98201	6.22574	6.41066	6.31269	5.53516
GL50803_17105	8.34402	8.52751	8.61863	8.50054	8.27292	8.23302	8.05694	7.81723	7.7289	7.66476	8.21982	8.31899	8.43467	8.50037	8.75487	7.86659	7.73094	7.36007	7.48211	7.39603	7.51914	7.41329	7.82186	7.37893	8.1911	8.49948	7.98812	7.78828	7.49227	7.37786	7.35311	7.23679	7.39837	7.8649	7.78898
GL50803_6422	7.83619	7.85861	7.80203	7.72447	7.63989	7.58245	7.57438	7.66346	7.71633	7.71317	8.5997	7.99366	7.99788	7.9148	8.0143	7.89343	7.81514	7.61809	7.51321	7.48876	7.37974	7.3175	7.20406	7.83583	8.0593	8.00565	7.97038	7.8097	7.66411	7.53228	7.47241	7.35212	7.46026	7.11583	8.04195
GL50803_6423	5.88679	5.84682	5.69262	5.74058	5.62131	5.56145	5.59949	5.57491	5.6764	5.6114	7.04499	6.10167	6.06574	5.85074	5.94095	5.89618	5.9159	5.63373	5.61688	5.68272	5.54119	5.34364	5.47864	6.03558	6.06929	5.9554	5.88367	5.94764	5.84368	5.62511	5.62615	5.71303	5.52556	5.29432	6.10079
GL50803_14198	6.85963	6.81113	6.73622	6.68913	6.44571	6.33554	6.15751	6.11269	6.08933	6.14601	7.14238	7.11738	7.06303	6.74549	6.81604	6.49486	6.34498	6.16244	6.00847	5.95368	5.76619	5.54101	5.82466	6.52989	6.51961	6.3851	6.39963	6.15737	6.14146	5.87482	5.88687	5.7087	5.75899	5.57026	6.68173
GL50803_17106	8.12503	8.134	8.1653	8.1662	8.2254	8.30148	8.42001	8.50484	8.51352	8.53967	7.49854	8.11333	8.23886	8.17932	8.23446	7.92545	7.73809	7.59131	7.61746	7.55967	7.7898	7.65464	7.62073	7.45278	7.88628	8.02498	7.81345	7.69161	7.68414	7.82752	7.90241	7.98373	7.88209	6.92424	7.72848
GL50803_27852	4.8907	4.60034	4.62541	4.87307	4.82267	4.94295	4.95487	5.05642	4.99844	5.03058	5.98952	4.68808	4.76553	4.66891	4.59873	4.86843	4.94852	5.15554	5.27513	5.36385	5.39487	5.31888	5.11108	4.94591	4.53953	4.45231	4.30754	4.57129	4.73484	4.81162	5.01263	5.0872	4.79952	5.24528	4.35664
GL50803_6427	6.70392	6.49189	6.52494	6.75142	6.92843	7.01349	7.21563	7.33936	7.48166	7.47335	7.23278	6.69893	6.85875	6.72251	6.64977	6.90069	6.98605	7.29744	7.18057	7.3056	7.37882	7.58286	8.51629	7.15228	6.59928	6.77491	6.89624	7.22928	7.29804	7.45846	7.59753	7.86641	7.72003	8.9809	6.83023
GL50803_14200	7.75043	7.37814	7.61682	7.73889	7.6363	7.59496	7.43898	7.27724	7.2694	7.15756	7.79743	8.04613	7.67131	7.36998	7.50348	7.5186	7.52496	7.58314	7.49686	7.53703	7.40772	7.40517	8.69744	7.49434	7.17171	7.27226	7.3643	7.50162	7.55296	7.53013	7.55512	7.64682	7.44061	8.53295	7.71683
GL50803_6430	12.1459	12.1781	12.2549	12.2357	12.1281	12.1134	11.9814	11.8007	11.8454	11.641	11.588	12.177	11.4795	11.8068	11.8367	11.6957	11.6023	11.7139	12.1622	11.1871	11.5235	11.6687	11.0867	11.5824	11.5401	11.7783	11.8541	11.5959	11.7027	11.6758	11.9326	11.5972	11.3936	10.2449	11.742
GL50803_17109	8.07481	8.16865	8.18501	8.11025	8.01639	7.88507	7.7481	7.61249	7.63502	7.57223	6.72476	8.03619	7.73663	8.0776	8.00692	7.30357	7.10617	6.9967	6.92382	6.79827	6.94902	6.92109	6.59679	6.87617	7.39154	7.70004	7.37647	7.19817	7.02005	7.03185	7.10701	6.96331	6.9707	6.63167	7.20352
GL50803_2906	5.73799	5.99332	5.96105	5.85697	6.15039	6.0124	6.21857	6.18161	6.23371	6.37621	5.67841	5.82506	5.84284	6.01107	5.9528	6.02841	5.89257	5.83479	5.80238	5.74395	5.94084	5.93992	5.60597	5.65489	5.88258	6.06317	5.895	5.9204	5.7681	5.90057	5.69491	5.67661	5.89877	5.81219	5.772
GL50803_22338	5.71631	5.90096	5.66959	5.66491	5.57039	5.39774	5.53126	5.38523	5.66405	5.49552	6.1452	5.80244	5.89145	6.05299	5.9739	5.91908	5.86886	5.7324	5.57708	5.49239	5.51275	5.41726	5.42352	5.61563	5.74013	5.98635	5.62568	5.72095	5.48047	5.44055	5.44454	5.5422	5.3663	5.57331	5.8337
GL50803_17110	7.45659	7.76215	7.72591	7.70277	7.60155	7.43426	7.31954	7.25142	7.36573	7.29929	6.7981	7.59903	7.68792	7.96076	7.99264	7.54791	7.36232	7.03532	6.96231	6.89333	6.91235	6.70364	6.56384	7.00545	7.59851	7.88291	7.56434	7.37871	7.03122	6.95433	6.91251	6.80092	6.9407	6.80697	7.31744
GL50803_17111	5.48501	5.36017	5.31477	5.33029	5.39646	5.36989	5.34946	5.34636	5.34114	5.33344	3.98876	5.41046	5.43401	5.41978	5.22724	5.33138	5.43609	5.51226	5.48148	5.66262	5.6373	5.61171	4.90983	5.49412	5.40944	5.20959	5.19189	5.3882	5.60818	5.55776	5.71543	5.94505	5.74036	4.32741	5.26133
GL50803_1656	6.65348	6.74739	6.68388	6.59442	6.71664	6.71101	6.77428	6.73756	6.80807	6.79773	4.96823	6.7104	6.71353	6.75445	6.68359	6.68787	6.57823	6.81012	6.76015	6.91445	7.04268	7.06204	5.99138	6.91826	6.80495	6.77491	6.77957	6.76896	6.82168	7.00217	7.01226	7.39444	7.21293	5.46876	6.6697
GL50803_1657	6.27566	6.2934	6.20342	6.10616	5.95549	5.91046	5.75252	5.54416	5.58621	5.40623	4.30409	6.34753	6.50047	6.40759	6.32621	6.5553	6.58222	6.70658	6.76458	6.86839	6.54785	6.53692	4.87864	6.79442	6.62348	6.35987	6.24498	6.30448	6.4346	6.19827	6.35075	6.16078	5.90595	4.51094	6.53421
GL50803_17112	6.61384	6.63474	6.65004	6.54369	6.47993	6.42186	6.38161	6.39527	6.49688	6.4803	5.46699	6.72108	6.7783	6.7197	6.66498	6.69717	6.66153	6.68731	6.68879	6.62628	6.63735	6.63122	6.23	6.70507	6.71905	6.5764	6.44143	6.49701	6.56038	6.42809	6.51261	6.63244	6.28682	6.1825	6.63236
GL50803_8816	4.78162	4.87184	4.85439	5.01797	5.20082	5.18477	5.2225	5.28503	5.47281	5.30295	3.94905	4.75335	5.05309	4.86737	4.87276	5.19356	5.20249	5.27838	5.40017	5.55479	5.42749	5.65801	4.92822	5.15397	5.03591	4.78307	5.05276	5.18674	5.24303	5.51925	5.21348	5.5599	5.53485	5.15831	4.94117
GL50803_102034	8.64808	8.75504	8.66833	8.58164	8.33648	8.18859	8.25493	8.2701	8.31746	8.28963	6.93548	8.73888	8.91974	9.10492	8.97341	8.7801	8.6864	8.50625	8.28365	8.25388	8.22001	8.22649	6.98728	8.50336	8.92857	9.05027	8.65853	8.49598	8.22505	8.12709	8.12743	8.21131	8.20127	6.85929	8.79295
GL50803_8819	4.64406	4.62034	4.55402	4.51919	4.37151	4.36849	4.47922	4.4105	4.71965	4.54346	4.13746	4.70539	4.92349	4.75105	4.70628	4.70676	4.75274	4.71632	4.57685	4.77572	4.69344	4.72326	3.80628	4.89529	4.80648	4.58577	4.40933	4.45872	4.58404	4.45461	4.27045	4.28591	4.49744	4.1986	4.63935
GL50803_8820	7.1358	7.1264	7.17143	7.00294	6.90409	6.81609	6.83404	6.88498	6.92651	6.91699	6.66475	7.25992	7.25593	7.27457	7.31567	7.24361	7.20246	7.18022	7.0576	7.05883	6.95463	7.03773	6.54608	7.28778	7.18086	7.17228	7.14312	7.03801	6.98764	6.98081	6.93455	7.00268	6.8921	6.73911	7.16674
GL50803_8821	7.86989	7.54655	7.48267	7.6206	7.68653	7.74323	7.77327	7.81045	7.84799	7.79302	7.26386	7.87659	7.9926	7.57362	7.58458	7.91865	7.97767	8.16908	8.08273	8.19632	8.18969	8.03833	7.63013	8.36713	7.86255	7.61042	7.82993	7.95958	8.2359	8.15921	8.3602	8.42637	8.16156	7.25667	8.12274
GL50803_8822	10.3565	10.2991	10.3535	10.5351	10.5562	10.6389	10.6884	10.7323	10.7356	10.6948	8.74877	10.387	10.3484	10.1126	10.2494	10.1401	10.1857	10.0698	10.279	10.1605	10.2837	10.2082	8.94822	9.86336	9.96229	10.0095	10.0711	10.1207	10.1222	10.1486	10.2901	10.1423	10.0896	8.12731	10.0072
GL50803_37711	6.09429	6.00097	5.91193	5.89427	5.73307	5.63934	5.69269	5.55557	5.62353	5.56481	5.79721	6.03704	6.09198	5.94762	5.93259	5.97915	5.8786	5.95592	5.84909	5.76923	5.70688	5.58321	6.5261	6.05458	5.91408	5.79656	5.69067	5.69195	5.6502	5.5507	5.57935	5.57264	5.29878	6.47035	5.94873
GL50803_8826	10.7895	10.2518	10.5264	10.5185	10.3526	10.2784	10.0449	9.86705	9.79853	9.57802	8.29182	10.5662	10.4578	10.1762	10.2178	9.96163	9.87696	9.75989	9.92464	9.39699	9.58873	9.48654	8.31841	10.1805	9.60572	9.9325	9.91475	9.90574	9.78718	9.71855	9.78194	9.68729	9.48952	7.56712	10.063
GL50803_8827	6.05905	6.18902	6.25498	6.09083	5.92574	5.72348	5.58461	5.27521	5.30448	5.23485	5.30973	6.08192	6.33193	6.3909	6.31339	6.42139	6.44606	6.42096	6.24701	6.19202	5.9719	5.87345	5.44071	6.46433	6.55186	6.64515	6.45424	6.42834	6.40545	6.0521	6.14685	6.20338	5.87089	5.78342	6.50471
GL50803_14783	5.13199	5.03965	5.10287	5.30835	5.61808	5.68767	5.85533	5.90292	5.83165	5.94654	5.1438	4.78355	4.56733	4.82091	4.68369	4.87078	4.94234	5.22782	5.57202	5.3869	5.72741	6.04353	6.06249	5.20398	5.14022	5.16033	5.15259	5.24979	5.46486	5.80659	5.90038	6.17964	6.06092	6.91824	4.92709
GL50803_50064	2.95946	2.78151	2.58201	2.62635	2.83844	2.85071	2.75994	2.78152	2.79311	2.96034	2.78919	2.9789	1.72255	2.22566	2.05609	2.48081	2.22727	2.75197	3.24917	2.35774	2.43211	3.48021	4.24822	3.21423	2.885	2.87757	3.24993	2.78116	3.1218	3.34557	3.73529	3.70863	3.57487	5.38068	3.5329
GL50803_1903	3.46931	3.47356	3.41684	3.6634	3.67462	3.47615	3.36566	3.43879	3.47819	3.46831	1.96196	3.74779	3.82458	3.55058	3.75325	3.93549	4.0883	4.12331	4.05098	4.36582	4.03657	3.9158	2.20281	4.08409	3.86054	3.83109	3.96952	4.08774	4.13701	4.06083	3.7453	4.10042	4.09826	2.97651	3.85118
GL50803_1902	6.12634	6.35338	6.40453	6.2987	6.11071	5.92146	5.79969	5.60815	5.65298	5.52503	5.78373	6.10493	5.8637	6.28745	6.1572	6.06275	6.03111	5.91272	5.77772	5.81972	5.58523	5.55412	5.66931	5.75892	5.99596	5.98281	5.94428	5.8341	5.83884	5.71996	5.7556	5.81706	5.48136	5.2906	5.75615
GL50803_104031	7.94736	8.50326	8.56601	8.47442	8.14601	8.04723	7.87037	7.739	7.79927	7.68046	7.2679	7.9619	7.47712	8.33963	8.21269	7.83413	7.74255	7.51801	7.52066	7.51553	7.3899	7.34795	7.07381	7.24478	7.86136	7.91358	7.84656	7.59505	7.57821	7.41872	7.4565	7.46446	7.259	6.85804	7.34306
GL50803_2366	5.24011	5.25536	5.34417	5.31936	5.92966	6.00531	6.53894	6.96719	7.15935	7.34215	6.63628	4.95739	5.24116	5.1647	5.34166	5.30032	5.54213	5.62218	5.73464	5.97774	6.31386	6.44045	6.11428	5.27588	5.14416	5.11365	4.93822	5.28323	5.46643	5.93022	5.76301	5.99795	5.92493	5.22985	4.92304
GL50803_16547	7.28472	7.33189	7.43441	7.33619	7.31964	7.28515	7.30008	7.27379	7.29276	7.25805	6.31411	7.22133	7.01227	7.17137	7.28035	6.7858	6.73552	6.62501	6.59971	6.72521	6.95276	6.8761	6.24964	6.57882	6.76008	7.08313	6.99895	6.96836	6.99527	7.14341	7.1041	7.20952	7.39922	6.46047	6.76611
GL50803_7103	6.71489	6.31094	6.58996	7.03133	7.77986	8.02779	8.37595	8.50652	8.45918	8.36032	9.41346	6.73731	6.29626	6.20141	6.41886	6.48722	6.63813	7.04292	7.35792	7.37106	7.93839	8.00767	8.69878	6.52157	5.97398	6.36983	6.74243	7.0177	7.50072	8.0052	8.09771	8.23655	8.38299	8.30485	6.73815
GL50803_14360	5.38453	5.14464	5.38588	5.51592	5.90335	5.93374	6.01598	5.99436	6.06554	6.06223	5.85206	5.14672	5.48401	5.14807	5.38255	5.4789	5.73454	5.73105	5.85742	5.96028	6.03795	6.08592	5.86022	5.62414	5.25765	5.30143	5.38275	5.77311	5.72287	5.93564	5.77038	5.89394	5.939	5.89278	5.25651
GL50803_7110	10.0086	9.95203	9.9575	9.86313	10.0863	10.1977	9.95902	9.84481	9.82373	9.7337	14.8109	10.0354	9.64706	10.0255	9.92782	10.0122	10.0559	10.3247	10.3609	9.89919	10.1387	10.0391	13.6498	10.0606	10.1222	10.0933	9.9398	9.99948	10.1701	9.96784	10.3476	10.0539	9.92638	12.9578	10.0505
GL50803_14361	6.89244	7.13974	7.09646	6.99197	7.07645	7.03519	7.20399	7.28313	7.3551	7.46467	8.80184	6.93921	6.92038	7.3063	7.21738	7.30401	7.20849	7.26205	7.16778	7.07006	7.27457	7.18571	8.09987	7.15913	7.44883	7.51935	7.46736	7.31737	7.24052	7.28784	7.25492	7.25864	7.33059	7.71574	7.28901
GL50803_14362	6.42631	6.3633	6.27176	6.53521	6.58876	6.6219	6.71536	6.87721	6.8577	6.92965	6.85399	6.48336	6.43965	6.4404	6.35061	6.55018	6.69257	6.69077	6.9025	6.9025	6.91235	7.07518	6.85893	6.50632	6.57248	6.38689	6.42503	6.75641	7.06475	7.02728	7.23152	7.59897	7.14017	6.51718	6.41455
GL50803_7114	5.13666	5.27442	5.44874	5.47318	5.60181	5.48377	5.53281	5.63605	5.67229	5.81508	5.3741	5.24075	5.44219	5.38472	5.39477	5.59294	5.61132	5.61637	5.85604	5.94483	5.84614	5.96469	4.92822	5.29553	5.55715	5.43514	5.66884	5.78001	5.94954	5.89946	5.97139	6.36681	6.26278	5.12949	5.30088
GL50803_16548	4.15709	4.47415	4.41487	4.71197	4.93341	5.09407	5.20314	5.33505	5.26142	5.44937	3.11039	4.38561	4.48418	4.53781	4.59571	4.57456	4.67033	4.62377	4.88738	4.90453	5.29034	5.41007	3.73841	4.45835	4.36817	4.73341	4.85561	5.16369	5.06189	5.45119	5.20806	5.48438	6.00069	4.52997	4.17444
GL50803_16549	8.61541	8.43621	8.45005	8.46974	8.24229	8.19299	8.27269	8.39212	8.4665	8.60856	6.88693	8.76251	8.84272	8.57264	8.65737	8.07897	7.83919	7.59574	7.58186	7.56726	7.87408	7.74141	6.77842	7.50243	7.79241	8.18798	7.87384	7.8776	7.78533	7.79447	7.8699	7.9216	8.13685	6.73911	8.0274
GL50803_14364	7.72817	7.8249	7.84379	7.94273	7.996	8.11934	8.30574	8.4749	8.45898	8.46407	7.90042	7.78829	7.72494	7.87556	7.86985	7.92063	7.8794	7.94023	8.00922	7.99189	8.25275	8.33804	7.68884	7.76135	7.89683	7.94695	7.95393	8.07891	8.2776	8.3126	8.39579	8.60014	8.54186	7.63605	7.85185
GL50803_16550	7.62808	7.32784	7.1796	7.35022	7.35647	7.3777	7.53155	7.69437	7.68204	7.75409	9.06193	7.78355	7.83343	7.33367	7.30646	7.70339	7.73928	7.78603	7.67398	7.61441	7.60049	7.54271	8.45893	7.88264	7.45121	7.30237	7.36068	7.62182	7.69287	7.52618	7.71806	7.63358	7.66253	7.79061	7.84544
GL50803_86761	7.69333	7.75312	7.64983	7.72777	7.59087	7.69775	7.8829	8.21259	8.18187	8.42118	10.9455	7.95045	8.11613	7.93069	8.01345	8.13652	8.24948	8.13722	8.07352	8.12442	8.14652	8.23695	9.96041	8.17171	8.2361	7.94543	8.05078	8.08227	8.21365	8.0884	8.19724	8.41382	8.31019	9.51396	8.25429
GL50803_16553	5.36476	5.23389	5.18491	5.20054	5.64849	5.71164	5.85905	6.03683	6.13379	6.12506	4.6934	5.34936	5.21083	5.08175	5.01975	5.28101	5.40044	5.53862	5.75856	5.78667	6.01309	6.22773	5.35266	5.64239	5.25218	4.90271	5.14418	5.33104	5.62373	5.89389	5.92481	6.15867	5.92611	4.83028	5.30555
GL50803_16552	6.34187	6.17557	6.14083	6.33061	6.59945	6.71497	6.78017	6.92636	6.85167	6.901	5.72852	6.43575	6.16201	5.9307	5.91694	6.13982	6.33164	6.47092	6.60797	6.72133	6.94964	7.09719	6.4347	6.46748	6.02937	6.01665	6.0981	6.24483	6.6686	6.88873	7.00811	7.29079	6.98885	5.66795	6.23426
GL50803_16554	4.74844	4.67555	4.4299	4.62236	4.45719	4.53716	4.25311	4.14312	3.98998	4.02732	4.04256	4.9331	4.22058	4.45235	4.37736	4.3537	4.29009	4.27487	4.54968	3.97183	4.26637	4.48381	4.1154	4.67296	4.58663	4.69069	4.79242	4.58713	4.49769	4.40854	4.27045	4.72589	4.47186	3.79941	4.56332
GL50803_32730	8.53875	8.57589	8.62272	8.58233	8.36061	8.32356	8.1174	7.90996	7.89247	7.7959	8.16889	8.53471	8.56121	8.54294	8.69349	8.17888	8.16569	7.8484	7.8204	7.89068	7.83746	7.77156	7.95639	7.99316	8.40963	8.5303	8.39653	8.27962	8.02933	7.89284	7.88809	7.75067	7.92426	8.02599	8.30438
GL50803_16556	7.49392	7.51217	7.59531	7.52825	7.46387	7.4268	7.359	7.2459	7.32318	7.22161	6.88588	7.55514	7.70502	7.66668	7.82347	7.66225	7.69797	7.37348	7.38171	7.3793	7.41768	7.3404	6.71627	7.3993	7.91106	7.93754	7.7372	7.69672	7.43933	7.34603	7.3095	7.22474	7.28953	6.93617	7.84678
GL50803_13901	6.18049	6.33029	6.31424	6.31309	6.52376	6.49643	6.79318	6.95309	7.06338	7.29032	7.52038	6.18219	6.58788	6.55758	6.63586	6.78642	6.85885	6.9939	6.86786	7.10076	7.2464	7.25562	6.96815	6.85165	6.77095	6.82318	6.82106	6.8268	6.69226	7.02982	6.81963	6.91786	7.28357	7.0754	6.67091
GL50803_21622	7.11406	7.22493	7.50532	7.51634	7.62749	7.64042	7.51437	7.37842	7.39632	7.34017	7.47007	7.11414	7.21115	7.29265	7.54401	7.30618	7.3681	7.23244	7.29081	7.39156	7.48898	7.34418	7.55419	7.02377	7.40721	7.66552	7.62605	7.6676	7.54445	7.60524	7.4226	7.19363	7.49044	8.43249	7.20519
GL50803_31391	3.01124	3.155	3.67418	3.77637	4.07421	4.18888	3.88145	3.88867	3.10057	3.39715	1.47274	2.80779	2.32808	3.06647	3.30539	2.94969	2.83753	2.99526	3.8317	2.64678	3.74019	3.95588	3.6961	3.05566	2.66127	3.17076	3.80316	3.66075	3.57581	3.80513	3.70484	3.60082	4.33664	3.64511	3.10261
GL50803_60194	2.5046	2.72106	2.59984	2.98827	3.6304	3.55247	3.46004	3.32153	2.23383	2.49886	0.726892	2.01638	-0.167244	1.00366	1.19106	0.424724	0.465178	0.526214	2.53102	-0.382714	1.47353	2.46606	2.28123	0.80398	0.491636	1.77226	2.21827	1.65432	1.35292	2.24609	2.24497	1.76494	2.80791	2.54927	1.45817
GL50803_60196	6.0713	6.15971	6.04156	6.29535	6.41252	6.38109	6.07363	6.07583	5.22266	5.48698	5.06798	5.9622	5.4982	5.98321	5.75577	5.71702	5.54757	5.56752	6.04419	5.51499	5.77889	6.00226	6.60444	5.66728	5.74792	5.88892	6.15991	5.77172	5.97621	6.12133	6.28364	6.1331	6.26929	6.07435	5.8877
GL50803_50066	5.93047	5.90232	5.9867	6.06227	6.32505	6.38557	6.1854	6.21076	5.43455	5.60878	6.72593	5.745	6.46397	7.26785	7.0426	6.73444	6.62724	6.76946	7.02899	6.76535	7.05549	7.1315	9.77871	5.6904	5.79506	5.81126	6.11003	5.96229	6.07823	6.07587	6.55093	6.54867	6.45541	7.59675	6.12655
GL50803_16194	7.50163	7.4418	7.44924	7.51347	7.49239	7.55665	7.4942	7.39029	7.36149	7.33423	7.77433	7.55713	7.27941	7.37892	7.52111	7.24452	7.14348	6.77599	6.91852	6.58559	6.79361	6.96594	6.97554	7.10295	7.40762	7.394	7.35841	7.3493	7.26055	7.07427	7.07214	6.66477	6.76487	7.55789	7.26201
GL50803_14525	5.29127	5.29115	5.4512	5.5481	5.77575	5.67228	5.69269	5.60815	5.45062	5.61794	6.04894	5.43488	5.05309	5.19132	5.39303	5.05778	5.08577	4.80839	5.02196	4.62599	5.13218	5.29173	5.53173	5.04632	5.49371	5.3165	5.33735	5.57769	5.39903	5.40031	4.84121	4.76527	5.12295	5.66508	5.16172
GL50803_7728	6.04669	5.98306	6.06743	5.92053	6.28179	6.20653	6.55659	6.62684	6.77719	6.84528	6.31098	5.92697	6.25969	6.2846	6.30046	6.33464	6.37514	6.43918	6.44245	6.54664	6.6389	6.71755	6.01738	6.30865	6.43689	6.20453	6.23313	6.22573	6.25292	6.52412	6.34664	6.41093	6.63689	5.99443	6.3091
GL50803_35180	8.01646	8.2124	8.21062	8.12601	7.92912	7.83557	7.77491	7.63992	7.6851	7.68451	8.84141	8.09812	8.32169	8.40255	8.46942	8.10791	8.10931	7.81802	7.82536	7.88404	7.90884	7.91381	8.61941	7.97693	8.31928	8.46524	8.22641	8.11677	7.87015	7.88809	7.70946	7.64116	7.89688	8.20136	8.2342
GL50803_8026	5.1938	5.44858	5.27924	5.13475	4.92559	4.80715	4.72439	4.64517	4.81703	4.75271	5.85635	5.32344	5.63726	5.77288	5.54954	5.51242	5.41837	5.13536	5.03181	4.99733	4.94703	4.76052	4.94035	5.30261	5.7774	5.80059	5.59051	5.52439	5.23201	5.14518	4.70679	4.60087	4.81741	5.03944	5.64497
GL50803_8025	4.74232	4.61703	4.75443	4.79002	4.6562	4.71212	4.77247	4.60496	4.77937	4.74557	4.5627	4.75888	5.03156	5.05077	5.0265	5.12432	5.26989	5.08786	5.02689	5.11245	5.02491	5.05851	5.38853	5.07141	5.11434	5.10065	5.12507	5.01239	5.01977	4.99531	5.06552	5.16497	4.97825	5.62436	5.19065
GL50803_8023	5.40403	5.44111	5.59818	5.49277	5.82283	5.78804	6.1403	6.24135	6.359	6.47958	5.4726	5.60903	5.55363	5.74827	5.92539	5.89964	6.21078	6.0602	6.00723	6.17887	6.3455	6.50181	6.08725	5.76662	5.78752	5.82186	5.72492	5.96956	5.86048	6.32356	5.93905	5.88247	6.3284	6.72129	5.84766
GL50803_114161	6.47782	6.45802	6.4544	6.44158	6.64621	6.61852	6.6127	6.85298	6.72927	6.9207	6.30312	6.26917	5.39576	5.93313	5.76387	5.51843	5.34056	5.31471	5.92373	5.27485	5.59484	5.84439	6.3644	5.46128	5.60083	5.8826	6.03921	5.58401	5.58237	5.83937	5.9215	5.56469	5.96446	6.65785	5.63014
GL50803_24471	1.98894	2.11644	2.32753	2.20044	2.30735	2.28746	1.82304	2.04426	1.02899	1.64256	0.481828	1.66171	0.867813	1.80543	1.48029	1.04046	1.17697	0.837237	1.87389	0.311225	1.60612	1.59796	0.928833	0.955395	1.15446	1.61052	2.06628	1.55474	1.24006	1.53915	1.57453	0.786603	1.4771	2.21503	1.66631
GL50803_14242	7.90076	8.05691	8.00556	7.92914	7.76533	7.65923	7.55656	7.40748	7.54325	7.43426	7.90146	7.90653	7.56629	7.92154	8.0646	7.49555	7.47514	7.09608	7.24708	7.30517	7.38806	7.43339	8.00774	7.49124	7.93344	8.0528	7.80414	7.77797	7.66616	7.57358	7.52856	7.33679	7.51335	8.15668	7.76288
GL50803_6564	7.7243	7.52239	7.48986	7.7393	7.49239	7.6031	7.44847	7.43421	7.42669	7.29644	7.76121	7.92111	7.93288	7.48328	7.6329	7.92488	7.99221	7.93411	8.06365	8.03604	7.77368	7.64701	6.78516	8.04684	7.61209	7.5307	7.77685	7.84734	8.07065	7.72254	7.90241	7.75207	7.25291	6.4996	8.03352
GL50803_6563	8.29421	7.74897	7.95925	7.88425	7.6343	7.56654	7.50214	7.65818	7.67283	7.72078	6.05644	8.42468	7.26565	7.02593	7.05695	7.12897	7.00546	7.04455	7.58354	6.71874	6.95214	7.27209	6.73729	7.55858	6.81981	7.13079	7.34103	6.99828	7.13893	7.19996	7.44465	7.2537	7.06569	6.07219	7.86061
GL50803_14241	6.99566	6.86101	7.07031	7.28713	7.21712	7.16442	7.0548	6.82161	6.73715	6.56661	6.6733	6.98069	6.83347	6.64463	7.02474	6.6738	6.79622	6.62139	6.72111	6.92686	6.87472	6.77189	6.74422	6.60626	6.67954	6.9608	7.07062	7.12791	7.13499	7.087	7.13155	6.89141	6.93017	6.91583	6.85063
GL50803_6559	4.08159	3.99653	3.8484	3.95076	3.8989	3.72255	3.83189	3.70187	3.90393	3.84325	4.36569	3.9208	4.34099	4.24512	4.02436	4.31278	4.33798	4.39174	4.24975	4.234	4.19235	4.20073	4.42269	4.41328	4.31672	4.02242	4.21418	4.25966	4.25789	4.23285	4.24246	4.34279	4.13948	4.10868	4.17444
GL50803_6558	6.61048	6.54952	6.37117	6.36395	6.21171	6.12557	6.11566	6.04841	6.1258	6.09164	6.30312	6.71895	6.91038	6.63197	6.59711	6.93198	6.80476	6.83848	6.78001	6.74637	6.46208	6.5394	6.39338	6.98909	6.66659	6.63617	6.50768	6.6291	6.60237	6.36757	6.55947	6.50115	6.27392	6.32545	6.87547
GL50803_24400	5.62951	5.83403	5.77146	5.79995	5.76556	5.65178	5.63316	5.5458	5.61643	5.55394	5.28443	5.77264	5.89861	5.98906	6.04871	6.16686	6.11598	6.10446	5.90107	6.06812	6.05197	5.92989	5.2196	6.07952	6.25113	6.36441	6.28091	6.2528	6.08642	6.12988	5.9314	5.93891	5.96216	6.01032	6.16907
GL50803_6556	6.21513	6.4224	6.46781	6.4596	6.42921	6.47138	6.45384	6.35761	6.40671	6.4037	5.59083	6.40694	6.62286	6.61619	6.61736	6.76636	6.74325	6.77208	6.65732	6.80867	6.79639	6.79002	5.9826	6.7646	6.8527	6.91884	6.98253	7.01536	6.72408	6.95487	6.57288	6.63926	6.9644	6.66504	6.80349
GL50803_16572	6.11218	5.93862	5.97479	5.94917	5.59361	5.45661	5.27352	4.99311	4.97197	4.82453	4.01206	6.15304	6.11877	6.03727	6.00497	6.09024	5.9635	5.8197	5.9224	5.81244	5.47682	5.34175	5.05639	6.16552	6.1192	5.9566	5.96473	5.86301	6.00132	5.56197	5.80549	5.59934	5.07914	5.27565	6.12831
GL50803_16573	7.42734	7.35743	7.40111	7.39878	7.14205	7.13192	6.98566	6.90613	6.8697	6.86465	5.40084	7.57882	7.56255	7.47706	7.54714	7.26388	7.14034	6.95587	6.78657	6.64485	6.69059	6.60861	6.86371	7.03657	7.34693	7.44203	7.32995	7.13977	6.95505	6.90872	6.86682	6.95361	6.82988	7.24808	7.35175
GL50803_15048	8.26837	8.65982	8.35971	8.28328	7.49151	7.01671	6.60461	6.33793	5.8181	5.91929	5.09733	8.78066	7.67756	8.72268	8.25424	7.77449	7.0997	6.68106	6.55174	6.1637	6.0739	5.88777	5.26372	7.17464	7.8363	8.06373	7.52398	6.88434	6.56771	6.08371	6.16187	5.73444	5.87212	5.1001	7.50185
GL50803_15049	7.20414	7.02314	7.04775	7.01517	6.93168	6.95411	6.91184	6.98658	7.02688	7.07969	5.74252	7.1483	6.76532	6.72882	6.78056	6.61331	6.58883	6.64869	6.69655	6.62698	6.73036	6.77819	5.85702	6.79001	6.4663	6.67323	6.60437	6.42834	6.63203	6.65089	6.67918	6.72164	6.58264	5.7158	6.74505
GL50803_28962	6.56443	6.73903	6.68701	6.60345	6.56462	6.61217	6.71945	6.74469	6.90102	6.76807	8.49089	6.63787	6.83719	6.89438	6.77923	6.94988	7.05215	7.12758	7.07199	7.1769	7.03916	7.14998	9.43212	6.79567	6.72893	6.52949	6.36657	6.51202	6.57936	6.54698	6.59103	6.61484	6.19793	9.97151	6.5838
GL50803_60210	3.01124	2.78151	3.06542	2.88534	3.12919	3.15572	3.02106	2.84663	3.02534	2.72878	5.2489	3.33089	3.13881	2.95616	2.94609	3.38422	3.52439	3.66403	3.73854	3.38292	3.52255	3.58617	4.29622	3.74787	2.84682	2.94699	2.86593	3.14011	3.2512	3.50586	3.25034	3.2974	3.1917	3.94824	3.48426
GL50803_9802	4.61758	4.43705	4.56768	4.42447	4.42796	4.53716	4.58174	4.54082	4.3362	4.36539	5.53829	4.71112	4.65723	4.44556	4.44942	4.66132	4.62986	4.81602	4.73895	4.76319	4.66939	4.74344	4.75357	4.76809	4.37489	4.37885	4.37019	4.53256	4.75038	4.48748	4.69393	4.83036	4.5746	4.70197	4.51571
GL50803_9803	7.33181	7.47696	7.16095	7.07681	6.30207	6.14389	5.9709	5.69027	5.65298	5.56481	4.9442	7.53954	7.52567	7.61316	7.35148	7.20407	6.8572	6.63151	6.41071	6.23258	5.88972	5.76058	5.33439	6.98799	7.4113	7.36576	6.80046	6.60051	6.18213	5.8125	5.8721	5.75834	5.49095	4.41188	7.22589
GL50803_16574	6.96185	7.138	7.15191	7.01179	6.88472	6.79306	6.61563	6.36318	6.42634	6.288	5.38009	7.0433	7.16987	7.25917	7.38117	7.07035	6.94694	6.76422	6.64855	6.7057	6.6443	6.58324	5.8181	6.82178	7.37151	7.50955	7.13836	6.98997	6.74038	6.74597	6.59311	6.63699	6.73896	6.11271	7.21019
GL50803_9807	7.08052	7.06752	7.11441	6.96558	7.08584	7.03329	7.1824	7.19524	7.23782	7.32986	6.89322	7.06469	6.91156	6.83328	6.99924	6.13689	6.05136	5.8755	5.86295	6.13286	6.42844	6.3399	6.0763	6.02599	6.36695	6.61348	6.31971	6.19816	6.1177	6.51979	6.3201	6.26943	6.59972	6.19645	6.07365
GL50803_9808	9.86397	9.98647	9.99821	9.78874	9.44386	9.16385	9.11907	9.22439	9.35196	9.38425	8.68101	10.0375	9.59058	10.0553	10.0207	9.57677	9.36057	9.23514	9.33255	8.6974	8.85173	8.83171	8.5168	9.1866	9.49523	9.8852	9.3901	9.21203	9.00671	8.767	8.69771	8.5851	8.45943	7.148	9.62801
GL50803_9810	9.46479	9.42384	9.55357	9.4297	9.16511	9.0333	8.82674	8.7985	8.79627	8.73733	9.52585	9.52326	9.33547	9.60642	9.61323	9.72957	9.74017	9.75378	9.87001	9.57377	9.42748	9.37038	8.97206	9.75027	9.39739	9.4033	9.38965	9.32354	9.43238	9.19536	9.28732	9.23103	8.87645	8.34479	9.51441
GL50803_60211	9.86485	9.8496	9.90456	9.80714	9.50724	9.47037	9.37961	9.29194	9.31646	9.17539	9.13673	9.87858	9.25008	9.69083	9.65682	9.50149	9.18684	9.27291	9.36749	8.49138	9.02253	9.0446	9.12008	9.16442	9.40788	9.67459	9.47838	9.22778	9.09403	8.83127	9.07193	9.02226	8.85093	8.29885	9.63135
GL50803_19509	2.81543	2.79331	2.85876	2.86144	2.89294	2.99312	3.08169	3.12557	3.21784	3.17409	2.05466	2.41748	2.09886	2.49918	2.68693	2.48081	2.54279	2.87388	3.26596	2.56829	2.82939	3.38065	2.6198	2.67416	2.84682	2.83635	2.8349	2.87704	3.12974	3.1278	3.44716	3.34273	3.48179	3.36341	2.55103
GL50803_15054	8.40844	8.47471	8.56204	8.55627	8.35868	8.23385	8.02173	7.96903	7.74982	7.75617	6.82467	8.35965	8.17795	8.49072	8.58761	7.98335	7.81485	7.5998	7.57935	7.46883	7.53004	7.45977	6.98142	7.52833	7.86435	8.22538	8.01288	7.77555	7.72698	7.69754	7.6673	7.65433	7.68114	7.12002	7.85265
GL50803_104685	8.34856	8.36218	8.12815	8.13788	7.78779	7.86864	7.78145	7.72572	7.79046	7.69691	11.4479	8.36964	8.45604	8.28862	8.248	8.4657	8.52179	8.63971	8.45266	8.53183	8.21067	8.20352	10.5047	8.48753	8.25968	8.00041	7.96562	7.94367	8.20428	7.92511	8.26251	8.21385	7.87539	9.93926	8.23543
GL50803_103164	6.31328	6.38001	6.36857	6.41924	6.09916	6.09431	6.06507	6.02281	5.91158	6.04196	4.86108	6.51152	5.85269	6.19333	6.02757	6.01891	5.93264	5.9044	5.76005	5.67739	5.83131	5.92989	5.46191	6.05563	5.88964	6.13823	6.20509	6.1241	6.00564	5.9614	6.00719	6.11579	6.08749	5.75675	6.19281
GL50803_16575	9.08861	9.11212	9.00401	8.8791	8.59048	8.3725	8.19591	8.06706	7.97475	8.06534	8.44381	9.05502	9.18441	9.21018	9.12018	8.74593	8.55206	8.14026	7.90757	7.63553	7.59491	7.48095	9.98533	8.40339	8.87947	8.97689	8.72067	8.47251	7.97691	7.65015	7.73323	7.60053	7.56947	10.4117	8.97097
GL50803_40783	5.00238	5.12378	4.89829	4.90557	4.79431	4.87806	4.7751	5.12145	5.01798	5.08254	4.98404	5.05516	4.74451	4.85973	4.85012	4.62278	4.55347	4.49352	4.62644	4.40183	4.48536	4.52436	4.04972	4.58569	4.69538	4.67323	4.5175	4.24775	4.25789	4.46365	4.31146	4.25463	4.40245	3.4983	4.61193
GL50803_5213	5.65252	5.86509	5.68846	5.63526	5.57873	5.57633	5.64326	5.63758	5.64742	5.66161	5.28762	5.5749	5.64862	5.62449	5.63737	5.46497	5.40943	5.42686	5.53787	5.30109	5.33688	5.33985	4.76043	5.43575	5.65016	5.40198	5.279	5.02174	5.1775	5.22	5.30769	5.2975	5.18331	4.46556	5.28203
GL50803_33809	5.49231	5.55805	5.37038	5.4332	5.37173	5.136	5.35298	5.56366	5.44902	5.49126	4.92796	5.38024	5.59825	5.68771	5.66357	5.63227	5.6178	5.35715	5.41341	5.44768	5.44884	5.29759	5.59066	5.52472	5.82728	5.62109	5.50111	5.2987	5.34206	5.2586	5.26309	5.46913	5.24692	5.82252	5.67056
GL50803_16577	6.88344	7.06448	7.0751	6.92002	6.79528	6.69346	6.7677	6.81349	6.82911	6.89294	6.2761	6.76921	7.0914	7.29643	7.28599	7.1082	7.05167	6.97756	6.78293	6.77287	6.71649	6.69922	6.81183	6.88209	7.34093	7.3635	7.01922	6.94827	6.70759	6.56599	6.6117	6.64757	6.67172	7.49474	7.10284
GL50803_98054B	12.1103	12.3923	12.7732	12.606	12.2943	12.0519	11.7798	11.7816	11.805	11.5722	11.6419	12.4776	11.0529	11.93	12.0755	11.7609	11.7102	11.7206	12.0698	11.4814	11.6964	11.6265	11.8599	11.2053	10.8415	11.7883	11.7379	11.6814	11.7305	11.6676	11.5857	11.3306	11.0156	9.8921	11.6882
GL50803_16578	5.64762	5.81825	5.91905	5.75525	5.94521	5.99623	6.19915	6.60896	6.50536	6.87505	10.4926	5.58429	5.46486	5.80771	5.82061	5.94497	6.09197	6.14236	6.15875	6.18734	6.26655	6.42268	9.46293	5.71979	5.68979	5.92377	5.8862	5.9091	6.07206	6.18831	6.24006	6.5519	6.46598	9.05992	5.70399
GL50803_5206	2.02968	1.93671	2.12073	2.73559	5.04591	5.93034	5.86028	6.63608	6.10667	6.42845	11.9648	1.9208	2.06535	2.07545	2.22201	2.64364	3.54085	3.60069	4.08449	4.06462	4.60111	4.5735	11.5748	2.42449	2.25774	2.32775	2.79247	4.21143	4.19872	4.22224	4.78166	5.25664	5.48456	10.3978	2.55103
GL50803_13863	4.69877	4.82664	4.86549	4.71197	5.05549	5.14659	5.32459	5.45475	5.46808	5.49836	8.43952	4.7781	4.94668	4.79177	4.75854	5.09042	5.2349	5.21442	5.314	5.48935	5.53121	5.55738	7.69691	5.06726	4.84573	4.8337	4.85045	5.09224	5.22275	5.35892	5.24027	5.34468	5.35234	7.25762	4.80696
GL50803_90950	7.27575	7.60375	7.40872	7.277	6.97338	6.77573	6.91422	7.05476	7.21637	7.36797	9.44699	7.46823	7.21641	7.64277	7.4497	7.078	6.92097	6.68801	6.61372	6.48921	6.55934	6.44662	7.76415	6.69972	7.318	7.40726	7.04712	6.87598	6.60664	6.63631	6.38637	6.42065	6.75297	7.62872	6.99845
GL50803_33807	6.7281	6.44313	6.4799	6.3756	6.19878	6.1975	6.18934	6.30548	6.41	6.53104	9.25399	6.78694	6.81846	6.68049	6.59333	6.50094	6.45839	6.39574	6.28869	6.38102	6.19676	6.20192	8.46419	6.61482	6.51277	6.59352	6.52803	6.53343	6.34192	6.27987	6.28707	6.41447	6.34524	8.57095	6.84047
GL50803_3470	7.84157	7.64012	7.9375	7.899	7.5697	7.48799	7.63885	8.46305	8.44461	9.13769	10.0122	7.54396	7.6538	7.48701	7.45555	6.7758	6.66404	6.44165	6.52497	6.55102	6.91107	6.95362	9.32456	6.54713	6.36695	6.81458	6.69858	6.79101	6.56844	6.68092	6.52356	6.73445	6.74231	9.12756	6.67513
GL50803_24194	7.32159	7.40336	7.24411	7.28095	6.83479	6.58388	6.40468	5.99675	6.07282	5.95895	5.3771	7.56664	7.3411	7.42105	7.32664	7.09921	6.84123	6.69629	6.57719	6.39245	6.18514	6.11608	5.22457	6.85285	7.00294	7.37073	6.99486	6.81273	6.59737	6.32934	6.35566	6.17024	6.1208	5.79657	7.12725
GL50803_16463	5.17122	5.22085	4.94438	4.90849	4.97947	4.99337	5.27166	5.48744	5.64603	5.67671	5.26516	5.41397	5.37881	5.09483	4.97395	5.26679	5.10988	5.23353	5.14958	5.06831	5.00583	5.14557	4.69032	5.44378	5.24118	4.99692	5.04374	4.89514	5.04309	5.08787	5.00432	4.96932	5.02738	4.49167	5.3241
GL50803_17243C	10.9661	10.9987	10.7961	10.9897	11.0149	11.1981	11.0177	10.9425	10.8969	10.6864	11.1026	10.9585	10.8996	10.7184	10.7229	10.9605	10.9332	11.0932	11.4216	11.3433	11.5826	11.613	10.1928	11.2873	10.9501	10.7727	11.0962	11.2613	11.5616	11.4996	11.7522	11.9704	11.693	10.4368	11.1067
GL50803_8173	7.19801	6.62982	6.69533	6.85493	7.90081	8.03636	8.47735	8.69309	8.67041	8.67305	8.55543	7.1163	7.18847	6.62598	6.70267	7.03515	7.12449	7.56251	7.5488	8.04254	8.54747	8.68161	8.01636	7.39558	6.51505	6.51323	6.62643	7.0603	7.60694	8.37042	8.28177	8.68527	8.73573	7.46457	7.17358
GL50803_8174	8.74894	8.65012	8.49779	8.68443	8.3004	8.31171	8.37053	8.49196	8.43112	8.46787	7.97199	8.9743	8.28053	8.18468	8.0946	7.69114	7.34445	7.11733	7.30153	7.01827	7.50986	7.52866	7.56892	7.22115	7.4627	7.77797	7.59398	7.63254	7.66889	7.72568	7.84102	7.86932	8.02584	8.09787	7.69176
GL50803_14654	5.94119	5.81969	5.77735	6.25349	6.40222	6.60366	6.77559	6.97692	7.01235	7.09476	6.00121	6.17289	6.24293	5.71619	5.8219	6.29929	6.39036	6.59578	6.57382	6.73999	6.89236	6.92109	6.10891	6.38817	6.01222	5.79387	6.11326	6.59504	6.72342	6.87862	6.76533	6.78185	7.16384	7.15516	6.2112
GL50803_14655	5.61453	5.49265	5.61801	5.53305	5.85887	5.99493	6.27158	6.61676	6.57076	6.73117	5.96584	5.46399	5.61861	5.40586	5.55888	5.48812	5.66864	5.72432	5.88077	5.92584	6.1936	6.25208	5.33898	5.62414	5.29535	5.37164	5.42677	5.61215	5.73594	6.0481	5.80907	5.99322	6.44147	5.87553	5.23869
GL50803_8182	7.12292	6.97736	7.27981	7.5344	7.88577	7.96519	7.95413	7.989	8.02201	7.93088	6.05457	7.25601	7.27071	7.21194	7.44341	7.55524	7.68043	7.78246	7.88295	8.05338	8.11097	8.07491	6.78516	7.31866	7.27327	7.33742	7.56867	7.83081	7.85914	8.11016	7.93695	8.05099	8.1839	7.5763	7.40026
GL50803_16464	6.27989	6.4328	6.4359	6.73343	6.93753	6.96811	7.05804	7.23935	7.23504	7.27179	5.9718	6.4392	6.59597	6.72251	6.68431	6.67043	6.57823	6.45147	6.51798	6.57774	6.81569	6.74997	7.47508	6.24116	6.58775	6.64962	6.62794	6.87146	6.82963	6.91203	6.85473	6.89712	7.1728	8.27744	6.42676
GL50803_60213	7.15492	7.38205	7.47061	7.57539	7.67569	7.77543	7.81213	7.7715	7.84799	7.74576	7.03365	7.19144	7.2817	7.45905	7.54009	7.41529	7.36155	7.25926	7.3764	7.49256	7.74736	7.74821	8.30028	6.89737	7.41986	7.69031	7.64257	7.83313	7.78282	7.80577	7.93257	8.07665	8.21556	8.84605	7.19515
GL50803_3563	5.73028	5.78023	5.83684	5.92918	6.11644	6.20596	6.36515	6.49934	6.50151	6.57268	5.2489	5.76165	6.07102	5.85843	5.90723	6.0576	6.1646	6.25604	6.4544	6.39001	6.50177	6.81339	5.85702	6.0671	6.07033	5.88134	5.91862	6.19506	6.47568	6.49649	6.58686	6.95847	6.75496	6.42873	5.98318
GL50803_3564	6.13803	6.2502	6.21648	6.05834	5.86433	5.77293	5.65185	5.52771	5.65576	5.60088	5.72852	6.3281	6.57678	6.4523	6.49947	6.55822	6.65461	6.5293	6.45988	6.31301	6.17557	6.1238	6.71274	6.63459	6.77031	6.66442	6.63771	6.54726	6.46159	6.20906	6.23029	6.11361	5.87089	7.46786	6.84154
GL50803_3565	6.87927	6.97542	6.7612	6.63728	6.42089	6.3746	6.40383	6.53599	6.59119	6.64357	5.81499	6.86733	6.96762	6.9908	6.85636	6.86635	6.77027	6.62862	6.56367	6.61308	6.47947	6.52448	5.65097	6.83892	7.04518	6.85384	6.66957	6.39903	6.37153	6.35467	6.37754	6.33539	6.24778	5.59756	6.80074
GL50803_13390	8.60513	8.47081	8.24326	8.53424	8.72611	8.74782	8.84559	8.78056	8.74996	8.71891	9.41838	6.77742	6.82097	6.87935	6.73736	6.65892	6.63302	6.61266	6.49056	6.76346	6.71576	6.74068	8.4425	7.76584	7.73477	7.77456	7.71819	7.77935	7.75163	7.75696	7.85148	7.96271	7.86928	10.246	6.60671
GL50803_137722	0.311151	0.301457	0.454066	0.463215	0.454483	0.802768	0.582503	0.664576	0.340104	0.0508817	1.17528	0.48585	-0.0161104	0.473444	-0.210892	0.372592	0.32009	0.526214	0.409225	0.365286	0.90156	0.222536	1.27383	0.493455	0.761662	1.04986	0.370528	0.995025	0.836311	0.850884	0.93506	1.26598	1.71379	3.23018	0.327781
GL50803_60223	0.437648	0.162883	0.287985	0.2588	0.395308	0.484426	0.582503	0.564904	-0.268731	-0.756323	-2.39665	-0.0991207	-1.51622	-0.579949	-0.596709	-0.467898	-0.878363	0.369218	1.11283	-0.4747	0.356102	1.0499	0.00536733	0.221956	0.389093	0.727965	1.08408	0.138684	0.671998	0.990866	0.93506	0.990233	1.09671	0.600189	0.117043
GL50803_60225	1.90383	1.75568	1.7574	1.44053	1.69716	1.54825	1.88268	1.92872	1.72228	1.86982	1.22932	1.70825	-1.51622	-0.820588	-1.70622	-0.566231	-0.766086	-1.72878	1.61025	-3.26925	-0.0601426	1.37958	1.41963	-0.769264	-0.452528	-0.101966	0.896488	-1.08589	-0.661382	0.654336	1.16126	0.786603	0.992597	1.08484	0.327781
GL50803_37093	6.39838	6.19236	6.13626	6.29981	6.45841	6.52196	6.47901	6.52774	6.25307	6.37621	6.14344	6.31406	5.43892	5.89875	5.62112	5.58006	5.3546	5.51695	5.72405	5.40798	5.81496	5.96591	6.27381	5.70384	5.78626	5.81126	5.97425	5.82879	5.82912	6.0521	6.19968	6.41093	6.39288	6.7661	5.91038
GL50803_14158	7.30457	7.35644	7.35196	7.34268	7.07115	7.02247	6.80928	6.50018	6.57516	6.44619	8.58196	7.41573	7.54099	7.4102	7.53339	7.33541	7.40004	7.27364	7.15376	7.15212	6.89948	6.91792	7.51923	7.29711	7.52107	7.42083	7.43756	7.2944	7.25829	7.02931	7.08304	7.00796	6.76881	7.46292	7.48512
GL50803_16339	7.06223	7.20796	7.1662	7.10952	7.05869	7.02406	7.08738	7.11382	7.11216	7.13177	7.87044	7.15462	7.17822	7.28411	7.29533	7.02093	6.89238	6.70453	6.51622	6.46543	6.55934	6.34274	6.86212	6.81437	7.26515	7.28955	7.14312	6.93038	6.77687	6.59714	6.57428	6.14487	6.4546	7.40228	7.00133
GL50803_6283	8.63225	8.81104	8.66543	8.49253	8.39642	8.31654	8.40187	8.36506	8.47379	8.3737	8.93812	8.79235	8.89343	8.91249	8.83424	9.00342	8.95284	9.03392	8.82715	8.86303	8.5993	8.51091	8.05245	9.28046	9.27074	8.99471	9.01677	8.90787	8.86894	8.60469	8.6328	8.50988	8.43647	8.05856	9.17897
GL50803_6284	6.93059	6.55559	6.73823	6.83665	6.80952	6.95143	6.8896	6.92636	6.82665	6.71724	6.94762	6.93616	7.19768	6.68121	6.8475	6.99369	7.26285	7.31054	7.35449	7.55894	7.35734	7.44268	6.42178	7.3204	6.76392	6.66442	6.71997	6.81407	6.99744	7.05795	7.08649	7.10707	6.8927	6.11271	6.98734
GL50803_6377	7.66572	7.76926	7.81115	7.86296	7.92749	7.96452	8.30461	8.34572	8.54939	8.39117	9.14291	7.82802	7.90917	7.85681	7.8736	7.70767	7.69981	7.53774	7.51233	7.67352	7.8334	7.73207	7.85268	7.3642	7.77662	7.86957	7.67213	7.70908	7.64934	7.91663	7.74357	7.55792	7.71323	7.52192	7.6455
GL50803_113871	6.91505	6.9793	7.09489	7.18068	7.16492	7.11644	7.02974	6.90486	6.94136	6.85362	7.2919	7.07971	6.94707	6.95897	7.04758	7.0967	7.18292	7.07664	7.13503	7.11019	7.01849	7.03071	6.53212	7.09788	6.97224	7.1104	7.22467	7.27791	7.27136	7.18728	7.18309	7.07105	6.89931	6.71853	7.05321
GL50803_6375	4.16626	4.23137	4.54023	4.61523	4.63398	4.37451	4.30125	4.09033	4.1362	4.1333	3.85766	4.52539	4.26922	4.25292	4.52123	4.38034	4.63242	4.40865	4.20256	4.29795	4.40025	4.30527	3.26575	4.41654	4.40477	4.54797	4.83486	4.78959	4.46981	4.5051	4.14752	3.88752	4.53499	4.12545	4.47479
GL50803_113873	5.7684	6.11812	6.19023	6.06751	6.04123	5.95866	6.0948	5.94442	6.25856	6.20969	7.23526	6.0786	5.9408	6.47831	6.6388	6.74216	6.84399	6.50119	6.37053	6.42464	6.61784	6.65424	7.58156	6.4659	6.52264	7.03042	6.99076	6.90407	6.58225	6.7552	6.50453	6.28789	6.79162	7.99894	6.76724
GL50803_102461	7.42353	7.7715	7.9163	7.96848	8.12112	8.16201	8.23075	8.20692	8.25275	8.29045	7.8273	7.68989	7.65345	7.92246	8.13418	7.98335	8.07627	7.9544	8.03486	8.15663	8.32741	8.17886	7.5283	7.77795	8.25968	8.53835	8.52175	8.60772	8.40862	8.57753	8.30543	8.18095	8.62836	8.02822	8.06533
GL50803_14626	6.25218	6.72294	7.69823	7.92842	8.21073	8.51836	8.51396	8.57497	8.72904	8.56627	7.89468	6.07416	5.98291	6.5987	7.17803	7.30965	7.61487	7.95527	8.45723	8.60124	8.46474	8.45082	9.37236	5.92868	6.83025	7.60545	7.93942	8.13466	8.5883	8.39051	8.53285	8.3868	8.18906	11.0498	6.33829
GL50803_113876	7.1235	7.07237	7.29289	7.24445	7.28032	7.22452	7.21756	7.17478	7.19221	7.14585	6.77558	7.27594	7.21258	7.24994	7.48482	7.23314	7.2374	7.18857	7.08446	7.21742	7.32595	7.2864	7.12255	7.13949	7.18755	7.50709	7.53689	7.53385	7.33972	7.39686	7.20728	7.14061	7.58745	8.10898	7.38562
GL50803_137721	7.55451	7.2888	7.30177	7.25366	7.52338	7.59496	7.61597	7.64527	7.41404	7.48662	8.02928	7.57372	5.29997	5.63796	5.59564	5.60004	5.49783	5.81843	6.32118	5.57501	6.0095	6.33516	7.09703	6.8013	6.4765	6.66442	6.88051	6.64204	6.93763	7.05147	7.50113	7.5778	7.34255	9.27273	6.8739
GL50803_4007	5.56514	5.44298	5.35995	5.43523	5.67205	5.78728	6.05862	6.17635	6.22906	6.40068	6.52187	5.67642	5.87824	5.51527	5.54014	5.90194	5.98372	6.15744	6.04298	6.37938	6.21245	6.13584	5.84739	6.26129	5.7812	5.63317	5.8204	5.93532	6.20392	6.28072	6.22494	6.24775	6.27115	5.61548	5.89805
GL50803_4008	3.96038	3.73435	3.8484	3.89298	4.12972	4.05787	4.31214	4.50429	4.70365	4.7669	5.54096	3.83427	4.25443	3.90749	3.88777	4.23097	4.24055	4.5586	4.5359	4.60086	4.51939	4.65185	4.88493	4.45835	3.96226	3.91267	3.87609	4.21958	4.19872	4.31839	4.32821	4.41177	4.45889	4.71865	4.20144
GL50803_13512	6.47874	6.3633	6.21069	6.24889	6.20741	6.15792	6.17152	6.32941	6.3607	6.49599	8.0307	6.34845	6.5261	6.29313	6.27614	6.59281	6.58486	6.72897	6.8239	6.6899	6.60046	6.68364	7.60462	6.81498	6.46866	6.35987	6.41457	6.4886	6.56844	6.46232	6.64617	6.74364	6.47164	6.83273	6.5494
GL50803_34058	6.46581	6.43751	6.49428	6.44761	6.2736	6.18328	5.91962	5.66191	5.57892	5.50402	5.79497	6.5607	6.7476	6.70414	6.85888	6.35241	6.33006	5.92922	5.92373	5.74777	5.67855	5.56064	5.24428	6.13808	6.83086	6.93784	6.60896	6.50537	6.13161	5.74736	5.76916	5.53082	5.61008	5.55795	6.7439
GL50803_2007	6.16457	6.00857	5.95067	5.93062	6.11873	5.9825	6.16453	6.2514	6.26402	6.39155	6.92426	6.18939	6.47677	6.23132	6.11668	6.35577	6.49477	6.63223	6.53453	6.88236	6.73761	6.82764	6.67148	6.8456	6.45286	6.0384	6.01749	6.14244	6.41361	6.48543	6.47926	6.5978	6.34259	6.28869	6.38541
GL50803_16054	6.48334	6.30786	6.31829	6.34684	6.18247	6.19524	6.18737	6.23933	6.14271	6.09352	8.06454	6.44694	6.52687	6.40846	6.41715	6.47336	6.42108	6.40504	6.37923	6.24795	6.23413	6.27899	7.00183	6.55531	6.4663	6.36441	6.36837	6.4204	6.63412	6.37077	6.65814	6.54706	6.17334	6.4996	6.54545
GL50803_1300	6.23159	6.1228	5.99683	6.03448	5.92181	6.0066	5.94432	5.96044	5.99061	5.87633	7.46656	6.19655	6.30616	6.1595	6.26001	6.26842	6.2346	6.21337	6.19097	6.1817	6.14538	6.16606	6.22257	6.36975	6.17805	6.10391	6.24498	6.16266	6.24746	6.28498	6.27244	6.3558	6.10944	5.99443	6.30988
GL50803_24807	5.27865	5.32404	5.29848	5.52165	5.74645	5.99297	6.16253	6.4738	6.493	6.72392	12.3098	5.37303	5.52772	5.47082	5.6226	5.56272	5.76055	5.69015	5.93689	6.17699	6.3848	6.47189	11.5223	5.64239	5.63483	5.63167	5.71074	5.87725	6.16484	6.37876	6.40306	6.51111	6.63761	11.175	5.60635
GL50803_36943	7.36652	7.34847	7.38834	7.34538	7.15437	7.1337	7.16499	7.08093	7.08618	7.12261	7.57747	7.48754	7.47114	7.33918	7.50187	7.32259	7.26615	7.14433	7.02345	7.18255	7.14759	7.1424	7.12521	7.29755	7.40269	7.47177	7.41806	7.28424	7.20149	7.27077	7.09825	7.02834	7.27666	7.61616	7.48581
GL50803_3141	4.73618	4.5491	4.5722	4.46866	4.2681	4.25345	4.3301	4.3444	4.25803	4.44986	4.00434	4.70826	4.53096	4.70915	4.72299	4.55715	4.3813	4.37807	4.1982	4.1709	4.42559	4.21318	4.07195	4.60872	4.63224	4.79657	4.58742	4.47584	4.43177	4.21154	4.41543	4.41884	4.45236	4.43897	4.73254
GL50803_2710	3.95511	3.77059	3.86325	4.3405	4.58185	4.93347	5.34946	5.59558	5.48222	5.58229	7.58138	3.9646	3.97653	3.87754	3.61089	4.1286	4.12517	4.25256	4.5701	4.59804	5.20717	5.37539	7.9918	3.74787	3.889	3.76672	3.81381	4.58398	5.17174	5.23592	5.57655	6.085	5.74036	7.74724	3.63547
GL50803_13104	5.75327	5.59051	5.55541	6.04513	6.38521	6.64117	7.11147	7.43421	7.31223	7.58596	9.28761	5.59671	5.63583	5.57714	5.41376	5.86586	5.69585	6.02554	6.4406	6.09936	6.71869	7.13478	7.9262	5.43575	5.63763	5.59042	5.6422	6.3837	6.75842	6.97081	7.27104	7.85048	7.75261	7.42617	5.45889
GL50803_16357	2.43046	2.29295	2.43079	2.87344	2.80473	3.14637	3.26467	3.56023	3.56338	3.6009	3.28637	2.36033	2.34214	2.24143	2.22201	2.1346	2.41762	1.89415	2.22245	2.49743	2.89307	2.76575	2.86864	2.1696	2.38309	1.85715	2.4129	2.42009	2.26683	2.72849	2.50273	2.68526	3.06052	2.39181	1.96309
GL50803_13103	7.60172	7.60918	7.58583	7.6575	7.56551	7.6327	7.63126	7.72536	7.76017	7.81337	7.70392	7.70754	7.58452	7.60861	7.56037	7.63796	7.64469	7.69488	7.62805	7.72159	7.75058	7.6149	7.85508	7.61121	7.66996	7.56895	7.56788	7.60714	7.81334	7.66296	7.82193	7.84031	7.66641	7.43292	7.53108
GL50803_13101	5.34674	5.38571	5.51133	5.73072	5.97709	6.13387	6.30466	6.65589	6.67425	6.83579	6.01666	5.36397	5.37369	5.27794	5.41033	5.50638	5.57847	5.55694	5.75113	5.79285	6.02971	6.05049	5.53973	4.99262	5.21332	5.26501	5.50605	5.77587	5.95178	6.12609	6.10373	6.27626	6.35139	5.73779	5.06947
GL50803_16356	6.11692	6.23081	6.4883	6.73507	7.06345	7.10291	7.29414	7.53765	7.54737	7.722	6.91811	6.21882	6.25969	6.31378	6.43838	6.39876	6.54868	6.54468	6.63083	6.82805	6.98051	7.05225	6.39778	5.99355	6.0755	6.27468	6.52236	6.77105	6.87286	7.13542	6.83612	6.99737	7.43069	6.7116	6.05711
GL50803_14677	5.33459	5.30563	5.34417	6.4606	7.06285	7.40246	7.84561	8.35903	8.29117	8.61983	8.38403	5.48587	5.59091	5.53139	5.51957	6.23505	6.21164	6.53701	6.89712	7.01246	7.53711	7.7389	7.55616	5.85354	5.68844	5.57171	6.19698	7.09395	7.49727	7.77281	7.77658	8.21538	8.4146	8.01928	5.74127
GL50803_28477	7.54312	7.4618	7.55759	7.5671	7.93854	8.18545	8.38306	8.74169	8.90533	8.98719	8.73308	7.31265	6.92797	7.19888	7.14483	7.406	7.3627	7.94429	8.09159	7.41618	8.28921	8.53509	8.36135	7.26757	7.38615	7.55075	7.6856	7.65451	7.7994	7.89591	8.38682	8.63073	8.6372	8.03656	7.27597
GL50803_16355	6.42535	6.40329	6.35156	6.71103	7.1125	7.34052	7.58489	7.71159	7.67454	7.75023	7.76235	6.44179	6.47597	6.36415	6.24369	6.53098	6.62596	6.82594	7.12701	7.2812	7.59651	7.67467	8.01134	6.72431	6.78994	6.50996	6.87289	7.36132	7.51859	7.80695	7.92406	8.24378	8.20079	7.78864	6.70963
GL50803_16354	6.90755	6.81475	6.93372	7.08457	7.07939	7.07669	7.10835	7.10719	7.08875	7.01828	5.60878	6.94651	6.96479	6.83718	6.85825	6.62659	6.7054	6.60388	6.89037	6.8916	7.16059	7.20038	6.15909	6.64785	6.60143	6.79857	6.79241	7.06144	7.00556	7.31847	7.08501	7.29848	7.62203	6.85553	6.6404
GL50803_8263	2.30331	2.55088	2.12073	3.40686	4.27222	4.48062	4.83419	4.93192	4.85132	4.90582	4.29144	2.86026	3.10622	2.27245	2.1079	3.23162	3.53539	3.97681	4.4393	4.65612	5.13657	5.30536	4.84676	3.24395	2.49841	2.52225	3.49454	4.43091	4.71914	5.17851	4.84354	5.4978	5.64055	4.96684	3.3029
GL50803_14675	6.85255	6.86101	6.84303	7.10825	7.53156	7.65718	7.90404	8.07416	8.07401	8.19949	7.58915	6.93065	7.02812	6.8488	6.7739	7.0341	7.08994	7.30514	7.59438	7.73833	7.99964	8.11943	7.3814	6.96084	6.89891	6.81856	7.01864	7.54281	7.74809	7.97021	7.95969	8.3627	8.36138	7.72334	7.06887
GL50803_8260	6.12046	6.18343	6.12399	6.34037	6.55536	6.74238	6.9431	7.10553	7.1831	7.15622	6.46811	6.10493	6.17974	5.99372	5.99927	6.17639	6.34966	6.49487	6.66762	6.70832	6.98722	7.00049	6.76142	6.18193	6.10107	5.92254	6.09919	6.49701	6.89049	6.87128	7.15708	7.54424	7.19398	6.6878	6.13446
GL50803_113892	8.72181	9.27946	9.57753	9.59363	9.67368	9.75073	9.60086	9.6199	9.65462	9.60179	7.10944	8.8016	8.26308	8.85553	8.79839	8.42268	8.4127	8.29196	8.65242	8.42472	8.59073	8.49229	7.40019	7.58604	8.26081	8.73988	8.7118	8.64943	8.76027	8.75845	8.71882	8.6746	8.66569	7.05803	7.86008
GL50803_16353	9.32652	9.33043	9.26064	9.24139	9.07164	9.00594	8.84075	8.62183	8.63553	8.53242	7.7675	9.37641	8.1933	8.44741	8.47827	7.94119	7.7722	7.54541	7.63614	7.42695	7.78841	7.63626	7.13975	7.74162	8.00453	8.08203	8.20002	7.96474	7.90469	8.03507	7.99657	7.94904	8.02776	7.39278	7.92759
GL50803_8253	6.23704	6.00351	5.92967	5.77777	5.80872	5.88959	5.85905	5.70936	5.84994	5.77822	5.59855	6.24075	6.1768	6.02594	5.93139	6.0689	6.1031	6.28837	6.24172	6.02574	5.97925	6.22466	6.51194	6.21701	5.82237	5.72919	5.78296	5.83278	6.00564	5.90831	6.07027	5.98372	5.73634	6.03938	6.26498
GL50803_24818	7.39408	7.65191	7.66315	7.50722	7.2844	7.23999	6.9582	6.65514	6.73453	6.56458	5.83037	7.39765	7.27071	7.57245	7.53537	7.11019	7.03094	6.7477	6.72187	6.84242	6.67935	6.68065	6.29286	6.89737	7.52523	7.62827	7.347	7.169	6.89458	6.8496	6.67853	6.66254	6.80449	6.75671	7.05876
GL50803_16954	7.67257	7.88365	7.62555	7.38364	6.76565	6.45869	6.22818	6.13893	6.21502	6.09633	4.99187	7.73204	7.94012	8.19483	8.08386	7.70042	7.41165	7.10025	6.82106	6.73743	6.47341	6.45276	5.25889	7.49202	8.15126	8.13823	7.49574	7.18989	6.77877	6.34573	6.35402	6.25961	6.15436	5.51085	7.76571
GL50803_20037	2.82703	3.07995	2.99977	2.55363	2.61027	2.52244	2.0824	2.13394	2.26323	1.77944	1.55967	2.98836	3.17853	2.96568	2.97428	2.9935	2.83753	2.83437	2.71345	2.26123	2.24952	2.36549	0.827951	2.90566	3.04532	3.17902	2.93583	2.71351	2.49301	2.27377	2.202	2.06457	2.17665	1.97703	3.05158
GL50803_13323	7.67096	7.66841	7.64017	7.52254	7.14205	7.04182	6.80864	6.47809	6.4727	6.33397	5.60623	7.78253	7.96844	7.83132	7.91084	7.64037	7.60414	7.29835	7.16107	6.96401	6.71649	6.52781	5.40175	7.66267	7.8901	7.92038	7.84039	7.68426	7.34783	6.93767	7.16176	6.88823	6.6412	5.51085	7.9753
GL50803_3341	6.23486	6.14022	6.10694	5.92918	5.82423	5.7321	5.50461	5.34823	5.20193	5.33978	4.12326	6.05178	5.90691	6.01222	5.93379	5.66379	5.60089	5.59289	5.58546	5.52542	5.40036	5.17134	4.08294	5.79827	5.87311	5.91018	5.77072	5.61215	5.60676	5.26033	5.4583	5.39934	5.05133	4.06587	5.9165
GL50803_3342	6.64449	6.64128	6.74225	6.85038	6.45479	6.4568	6.16853	6.09605	6.0811	6.22433	6.13462	6.73871	6.46477	6.53057	6.71595	6.30278	6.27781	5.93973	6.04662	6.06302	5.91806	5.80378	5.49107	6.03558	6.20471	6.38152	6.48288	6.36269	6.08744	6.05907	5.82922	5.91034	5.94947	5.51085	6.28879
GL50803_16953	6.42249	6.42714	6.56407	6.4446	6.48704	6.39892	6.49264	6.33036	6.4727	6.42025	8.34326	6.40252	6.69926	6.69773	6.68857	6.507	6.52336	6.56594	6.41637	6.49225	6.3559	6.41281	7.09974	6.43724	6.56588	6.65852	6.49119	6.481	6.54636	6.50746	6.517	6.48018	6.47486	6.61692	6.48973
GL50803_3345	4.92889	5.02472	5.22856	5.1521	5.08154	5.03449	5.08116	5.09266	5.03085	5.00289	5.7724	5.08853	5.05522	5.11849	5.13453	4.99667	4.99308	4.95603	5.04403	4.95168	4.90646	4.80783	4.53096	4.88825	5.09003	5.09192	4.90624	5.0878	4.98517	5.17301	4.81293	4.63164	4.94144	4.16655	4.80696
GL50803_16952	6.13803	6.1263	6.08969	6.06358	6.14479	6.02266	6.0391	6.02867	5.99828	5.84436	5.95386	6.1071	6.26247	6.25772	6.38601	6.2259	6.09755	5.9339	5.9224	5.85439	5.87271	5.74922	5.31588	5.83291	6.29344	6.14669	6.0684	5.88624	5.93828	5.80066	5.84908	5.7791	5.82237	4.82001	6.06448
GL50803_14704	8.47241	8.55115	8.65373	8.59891	8.56007	8.50574	8.55062	8.53601	8.54229	8.55525	8.78389	8.51745	8.61359	8.77066	8.82395	8.28845	8.15526	7.96987	7.9012	7.85245	8.02888	7.78761	8.06843	7.88559	8.48382	8.8268	8.48204	8.40196	8.12555	8.08426	8.08347	7.89934	8.10287	8.13147	8.39087
GL50803_28526	5.11079	4.77108	4.96173	4.79002	4.90717	4.92393	5.07904	5.38705	5.52835	5.6578	6.18163	5.00477	4.91881	4.88504	4.92424	5.13413	4.95877	5.271	5.04159	5.14179	5.10554	5.13252	5.69818	5.11227	4.95296	4.99692	4.75424	4.75075	4.86186	4.9097	5.04743	5.05806	4.95766	5.32368	4.93716
GL50803_8423	5.97026	5.9492	5.86845	5.76494	5.40211	5.24843	5.03153	4.83363	4.89424	4.84696	4.32905	6.12437	5.90572	5.90123	6.05422	5.85759	5.56511	5.50442	5.33205	4.74801	4.83529	4.81329	4.54692	5.63399	5.81867	5.97215	5.6437	5.45704	5.13473	4.86945	4.91179	4.55025	4.48471	4.12545	5.92057
GL50803_93103	4.77564	5.14003	5.20253	5.28383	5.08154	5.10979	5.01385	4.91936	4.88244	4.92492	4.71723	4.93555	4.90704	5.00071	5.16338	4.44488	4.3222	4.06904	4.17616	4.1671	4.35573	4.30139	3.90863	3.87679	4.44685	4.82055	4.64818	4.4414	4.16046	4.44855	4.12085	3.89261	4.53808	4.51094	4.22795
GL50803_8426	9.23462	9.18974	9.04324	9.0293	8.74956	8.66532	8.57191	8.5021	8.5421	8.56981	9.97365	9.32705	9.25369	9.24664	9.27492	8.69659	8.44423	8.00086	7.89649	7.76592	7.92162	7.66375	8.02137	8.22485	8.97881	9.11969	8.68867	8.33319	8.09215	7.98074	8.05256	7.9244	7.96753	7.70323	8.78181
GL50803_8427	6.15309	6.18007	6.07223	6.06096	6.3171	6.23658	6.3721	6.40971	6.57076	6.51012	8.53848	6.0786	6.36156	6.29597	6.12403	6.41496	6.35898	6.39404	6.27216	6.20783	6.19043	6.15749	7.65795	6.25492	6.50513	6.18208	6.27514	6.29198	6.25655	6.09248	6.25064	6.15019	6.01516	6.89763	6.3253
GL50803_8428	7.92594	7.951	7.902	7.86709	7.78959	7.79912	7.85711	7.94445	7.95743	7.95379	7.92927	7.8088	7.52143	7.73891	7.72737	7.54718	7.51631	7.62606	7.6466	7.53482	7.71358	7.89557	7.36799	7.64363	7.66036	7.7313	7.72103	7.63635	7.69187	7.77038	7.76832	8.01382	7.84613	7.2452	7.5698
GL50803_8429	7.68896	7.82884	7.83769	7.67046	7.60114	7.49997	7.39529	7.29679	7.28113	7.19912	7.36311	7.6491	7.62713	7.783	7.6461	7.47329	7.4228	7.38762	7.25709	7.42933	7.34601	7.35359	9.03777	7.3993	7.44604	7.51323	7.32995	7.21966	7.23271	7.20221	7.1041	7.20032	7.08428	9.24326	7.28862
GL50803_8430	4.9661	5.22738	5.27092	5.30835	4.9895	5.19501	4.82662	4.79565	4.64622	4.52966	6.36477	5.31029	5.09105	4.90745	5.14076	4.82544	4.90254	4.75914	4.79208	4.63427	4.88834	4.78576	5.25889	4.81588	5.06738	4.92501	5.23412	5.0631	4.80099	4.87624	4.43411	4.54055	4.77096	5.0261	4.84598
GL50803_16951	6.94398	6.79289	6.98467	6.91567	6.62624	6.56777	6.36341	6.17951	6.12079	6.12046	6.31098	7.23083	7.06515	7.00991	7.40164	7.16054	7.16267	6.92506	6.81964	6.77474	6.78104	6.7139	5.93792	7.06078	7.06455	7.28955	7.33134	7.211	6.99744	6.87071	6.75236	6.49782	6.64835	6.73775	7.41943
GL50803_8432	3.60356	3.5998	3.48561	3.47933	3.77089	3.79912	3.83189	3.68417	3.6605	3.61664	3.1389	3.55116	3.37596	3.7566	3.80125	3.84274	3.77694	4.15172	4.24975	3.88197	4.19657	4.28574	3.72445	3.75304	3.80685	3.94212	3.82964	3.99106	4.11718	3.95369	4.31818	4.35759	3.95787	3.86079	3.79467
GL50803_8433	5.55122	5.39348	5.47796	5.66664	5.64849	5.83681	5.67171	5.7282	5.75093	5.63221	4.38368	5.5335	5.48559	5.42669	5.44767	5.57575	5.64978	5.55542	5.68244	5.64087	5.65731	5.61953	5.8181	5.45653	5.46564	5.29384	5.48288	5.5178	5.7255	5.69459	5.86982	5.83436	5.67879	5.94332	5.57701
GL50803_16950	4.54565	4.62695	4.8618	5.27481	5.6705	5.95331	6.03801	6.04726	5.97293	5.85103	3.80526	4.46569	4.39595	4.50227	4.64037	4.90329	5.01485	5.23543	5.45061	5.71431	5.93455	5.79552	4.35178	4.4866	4.55145	4.62261	5.18781	5.44145	5.71366	5.98357	5.9978	6.0237	6.26929	4.97149	4.42124
GL50803_137720	5.89232	5.91452	5.89758	5.98694	5.9934	6.02394	5.93379	5.74964	5.86919	5.73077	4.75456	5.82901	5.81664	5.82743	5.88141	5.94274	5.88399	5.90678	5.97696	5.93257	5.95335	5.91217	5.18433	5.95251	5.88022	6.11365	6.14734	6.11757	6.10668	6.07686	6.01652	5.81706	5.96789	5.98527	6.00537
GL50803_8782	7.05916	7.29504	7.15569	7.00362	6.72041	6.58301	6.37643	6.24739	6.31317	6.31881	6.27128	7.19706	7.26703	7.50671	7.38336	7.32345	7.05454	6.82846	6.83026	6.54444	6.37833	6.17352	6.49147	7.03178	7.66208	7.51894	7.25526	7.09173	6.82963	6.46907	6.62599	6.28209	6.18519	6.91341	7.36412
GL50803_8781	7.58302	7.85299	7.81783	7.88425	7.91108	7.99154	8.19272	8.38643	8.50258	8.41669	8.34785	7.67313	7.77276	7.68517	7.54166	7.87159	7.97388	8.04344	8.23385	8.26858	8.15682	8.26912	8.68623	7.68992	7.68051	7.47807	7.47493	7.63025	7.89074	7.88305	7.86043	7.94568	7.76385	8.17743	7.46715
GL50803_16949	4.96085	4.68507	4.77812	4.97962	5.21158	5.17331	5.28093	5.26929	5.2596	5.25176	3.9809	4.9598	4.78625	4.81566	4.917	4.97498	5.23321	5.3779	5.41153	5.47406	5.5804	5.52943	4.41401	5.10013	5.04225	5.23756	5.10787	5.41507	5.53979	5.54645	5.52954	5.58527	5.56087	4.62149	5.09489
GL50803_103818	7.38037	7.47924	7.61518	7.63653	7.54226	7.53845	7.36946	7.3403	7.34869	7.22332	6.72123	7.42708	7.48467	7.556	7.80004	7.28562	7.34015	7.11269	7.21934	7.3056	7.43873	7.40878	6.62713	7.17271	7.50928	7.72672	7.62492	7.58995	7.52199	7.52978	7.47429	7.42549	7.54667	7.10741	7.38929
GL50803_16948	8.02025	7.92779	7.83205	7.86634	7.69652	7.73643	7.58601	7.56612	7.4691	7.35707	6.96365	8.13665	7.56142	7.71511	7.58648	7.41005	7.08901	6.88876	6.87404	6.6537	6.78943	6.6626	8.40687	7.10042	7.39486	7.55393	7.32018	7.151	7.0061	6.97133	7.09385	6.85211	7.11766	8.80726	7.42517
GL50803_91712	7.82104	7.95757	7.89434	7.90595	7.73021	7.7703	7.60752	7.48451	7.35297	7.26389	6.34808	8.06218	7.25035	7.58563	7.45763	7.16342	6.86267	6.68662	6.62596	6.40622	6.67407	6.42892	7.31306	6.7459	7.16446	7.41603	7.1552	6.89646	6.67472	6.82409	6.67329	6.36407	7.07687	7.9302	7.17868
GL50803_8771	3.41652	3.235	3.26863	4.29661	4.60162	4.9389	5.3011	5.46343	5.36676	5.31265	4.25934	3.80779	3.48769	3.18533	3.53722	4.32312	4.52892	4.75386	5.11756	5.06219	5.1988	5.35305	4.25795	4.04663	3.58127	3.60432	4.3557	4.85907	5.26303	5.35244	5.3493	5.45716	5.58941	4.03956	3.97371
GL50803_8770	7.60467	7.11234	6.84303	7.17159	6.82851	6.94841	6.98112	7.2348	7.0769	7.16204	7.24184	7.79875	7.97353	7.16208	7.20603	7.64759	7.59431	7.62967	7.57135	7.57981	7.43249	7.35546	6.70742	8.05341	7.1301	6.99515	7.25673	7.35162	7.43413	7.24172	7.46939	7.27578	7.13254	6.32726	7.96697
GL50803_28629	6.69682	6.28611	6.1286	6.32078	6.29804	6.40775	6.48384	6.67991	6.6763	6.59405	6.66597	6.70109	6.77442	6.25092	6.2006	6.52801	6.41959	6.62066	6.65254	6.58985	6.58849	6.63354	6.34399	6.84014	6.3014	6.09738	6.29902	6.39093	6.6201	6.54698	6.74364	6.69422	6.52626	6.12527	6.72716
GL50803_91707	5.22921	5.22085	5.66536	6.11504	6.63586	6.78856	7.23292	7.17795	7.32579	7.38186	8.68464	5.44179	5.2374	5.15224	5.34526	5.61974	5.68971	5.84103	5.96029	6.03827	6.54867	6.68438	8.73188	5.47388	5.41271	6.00507	6.41282	6.37916	6.41442	6.99958	6.84662	6.76391	7.14827	9.21464	4.70921
GL50803_2382	7.0243	7.08021	7.09881	7.07161	6.97211	6.93998	7.03303	7.07075	6.91845	7.12352	8.2934	7.12491	7.35676	7.33137	7.25568	7.29441	7.23445	7.2138	6.9853	7.0475	7.01492	7.01657	7.79036	7.30506	7.33836	7.35395	7.20104	7.12574	6.75136	6.9745	6.78669	6.82575	7.22781	7.50759	7.34154
GL50803_35428	8.97259	9.15131	9.02232	8.88856	8.48357	8.23798	8.09945	7.99739	7.9916	7.93245	7.19679	8.9985	8.6246	9.11164	9.02373	8.40738	8.09521	7.78149	7.63776	7.59651	7.57158	7.39745	7.27644	7.91389	8.56028	8.82893	8.34562	8.08143	7.77903	7.60694	7.74326	7.60867	7.69779	7.20039	8.29618
GL50803_16737	5.1938	5.24252	5.23713	5.09686	5.26214	5.00505	5.07691	4.95425	5.06881	4.87342	4.75916	5.30463	5.43565	5.54415	5.59715	5.33479	5.31047	5.16153	5.05855	5.06219	5.14749	4.92352	5.58294	5.15788	5.60083	5.60277	5.50932	5.33104	5.25397	5.03426	5.15648	5.05806	4.98731	6.39799	5.49753
GL50803_16736	6.32355	6.5027	6.56634	6.48915	6.41065	6.3012	6.34321	6.19	6.26402	6.22689	6.15744	6.4572	6.53071	6.69057	6.8251	6.55822	6.52681	6.30834	6.27838	6.28961	6.24535	6.23996	7.0446	6.36299	6.72827	6.8106	6.73405	6.54564	6.24197	6.28327	6.11535	6.06485	6.2859	7.70113	6.65817
GL50803_103810	7.78058	7.73451	7.76299	7.71907	7.80814	7.77277	8.05532	8.25943	8.29072	8.35094	8.37207	7.77161	7.67131	7.82087	7.98227	7.4325	7.44119	7.17529	7.20036	7.37807	7.76306	7.70586	7.67166	7.36293	7.71636	7.89112	7.61886	7.57255	7.55739	7.82636	7.63098	7.41448	7.94068	7.83079	7.6971
GL50803_5497	4.30549	3.97079	3.86325	4.12652	4.14776	4.23592	4.13137	4.23921	4.28695	4.1835	4.9722	4.08853	4.12623	3.96559	4.1367	3.95335	4.13605	3.99035	4.11261	4.33228	4.45402	4.43855	4.76043	3.7582	3.98441	4.03614	4.21016	4.47924	4.543	4.38652	4.65993	4.74008	4.32239	4.88055	3.98152
GL50803_16734	6.4815	6.63556	6.80414	6.94084	6.94464	6.91679	6.95357	6.9251	6.98834	7.05004	8.08712	6.6326	6.66122	6.73857	7.0021	6.72473	6.89452	6.73703	6.89307	7.01352	7.23927	7.43826	8.23652	6.5449	6.73416	7.03384	6.99603	7.32683	7.24875	7.31889	7.27536	7.70872	7.83708	8.42064	6.61928
GL50803_103807	8.07481	8.27472	8.03249	7.96673	7.56928	7.3441	7.41688	7.31799	7.44244	7.46068	6.53935	8.29322	8.32236	8.46472	8.33095	8.21494	7.97287	7.80115	7.6006	7.44235	7.32403	7.37407	6.68777	7.9254	8.48012	8.44995	8.07532	7.87437	7.56509	7.35537	7.38187	7.48945	7.48005	6.77144	8.21279
GL50803_16733	6.89175	6.97865	6.67654	6.50274	6.22451	6.0821	5.84287	5.6437	5.76513	5.74397	6.95265	6.99952	7.23348	6.97615	6.882	6.87164	6.91624	6.71748	6.56452	6.56119	6.26354	6.18516	6.47696	7.0717	7.26243	6.75569	6.71571	6.65036	6.53893	6.21353	6.18504	6.09055	5.9355	6.2586	6.97419
GL50803_16732	5.15289	5.37986	5.07763	4.82752	4.65305	4.43143	4.29761	4.18149	4.29053	3.93822	3.58465	5.14672	5.19154	5.26643	5.26766	5.12037	5.11539	4.99014	4.90625	4.79061	4.62944	4.63959	4.09384	5.27948	5.6094	5.22763	5.11219	4.94023	4.90183	4.70385	4.73218	4.70868	4.43592	4.12545	5.31486
GL50803_16731	8.66535	8.71181	8.73087	8.71705	8.40418	8.30753	8.04012	7.68994	7.68374	7.47659	8.16586	8.63825	8.57094	8.56032	8.7525	8.22348	8.23099	7.93235	7.90221	7.9107	7.70177	7.60785	7.61412	8.0442	8.3208	8.35349	8.35408	8.1233	8.01814	7.76338	7.8587	7.58607	7.48725	7.7095	8.23175
GL50803_13475	5.52117	5.47628	5.29027	5.42507	5.51413	5.45566	5.42495	5.69764	5.77154	5.81281	6.94762	5.27401	5.19542	5.21147	5.13244	5.01591	4.99308	4.65245	4.86276	4.86755	5.02017	4.9361	7.68524	4.96388	5.10426	4.98753	4.8138	5.02407	5.17941	5.16379	5.48393	5.13737	5.04484	7.54937	5.20406
GL50803_137719	5.9345	5.82113	5.91193	5.83259	5.97583	5.90006	6.14437	6.14972	6.28029	6.30024	6.36175	5.81712	6.08677	5.96434	5.88141	6.02314	6.16194	6.31821	6.09441	6.37527	6.40406	6.47189	6.29994	6.10809	6.10815	5.81126	5.72773	5.81136	5.94842	5.98357	6.09004	6.21155	6.0404	6.18049	5.83263
GL50803_89887	7.74011	7.90691	7.86284	7.80578	7.4311	7.2758	7.0176	6.89206	6.79869	6.7533	7.27434	7.83492	7.67513	7.91141	7.84526	7.28033	7.1313	6.72358	6.71959	6.60818	6.52792	6.41011	6.28575	6.85466	7.51042	7.63542	7.10136	6.91038	6.78758	6.45629	6.5552	6.42592	6.20862	6.2756	7.26361
GL50803_17120	3.55554	4.35588	7.60913	8.64996	9.20886	9.53684	9.59947	9.52114	9.62926	9.37531	9.13342	3.71397	3.51897	3.97033	7.03648	7.95649	8.37685	8.75511	9.32693	9.34465	9.36545	9.20235	11.0015	4.0882	4.43725	6.60813	8.65576	9.24198	9.45498	9.47319	9.48126	9.49355	9.1362	12.9465	3.92998
GL50803_11099	6.25003	6.11225	6.17841	6.23268	6.22557	6.18328	6.19033	6.13893	6.26038	6.08599	6.20372	6.14989	6.48471	6.32677	6.44175	6.33293	6.45405	6.32446	6.33019	6.37362	6.40041	6.41371	6.32792	6.22728	6.39036	6.45144	6.38006	6.37551	6.25746	6.29091	6.23563	6.18276	6.22786	7.20828	6.42031
GL50803_11100	8.25125	8.44418	8.45005	8.43473	8.27009	8.14934	7.97368	7.63609	7.70667	7.56006	7.21699	8.34592	8.39792	8.46912	8.61678	8.10417	8.0071	7.9469	7.84714	7.84206	7.86584	7.68365	7.60938	7.92998	8.26625	8.481	8.31034	8.22297	8.11558	8.04339	8.0884	8.11008	7.9618	8.10529	8.16
GL50803_15338	6.48517	6.56164	6.52143	6.58441	6.62543	6.64657	6.58305	6.3332	6.41246	6.35759	5.27803	6.70754	6.61274	6.63347	6.62182	6.78704	6.72054	6.93267	6.7668	6.75716	6.74554	6.67391	6.00877	6.76204	6.69306	6.82581	6.95574	7.01302	6.99527	7.02525	6.92026	7.15921	7.13712	6.30535	6.80294
GL50803_15339	6.6046	6.8234	6.9249	7.1867	7.44667	7.61013	7.80412	8.02607	8.01771	8.07677	7.65787	6.77127	6.92213	6.92155	6.97852	7.05027	7.17591	7.19638	7.37689	7.4971	7.73871	7.83237	7.49989	6.64159	6.98548	7.02183	7.17701	7.41466	7.55922	7.72192	7.75259	8.02805	8.06407	7.51874	6.78576
GL50803_11105	7.73742	7.76328	7.63207	7.71949	7.52984	7.51139	7.624	7.67844	7.69929	7.68295	8.31621	7.9174	7.9873	7.86892	7.89311	7.89862	7.7806	7.6695	7.58897	7.30949	7.35969	7.34701	7.26201	7.92684	8.01587	7.956	7.86427	7.87308	7.70156	7.60388	7.54656	7.22221	7.40345	7.57478	8.15785
GL50803_15340	6.69207	6.6815	6.62413	6.64255	6.60191	6.63658	6.79059	6.88498	6.81677	6.96545	7.97595	6.83689	6.83657	6.68482	6.80038	6.45937	6.46703	6.38382	6.32719	6.49982	6.75128	6.86232	8.05594	6.32959	6.52944	6.63091	6.59976	6.5777	6.64525	6.63097	6.84952	7.13525	7.22638	8.01759	6.54677
GL50803_11107	7.17663	7.20741	7.27079	7.31765	7.06523	7.15396	6.99975	6.94877	6.96504	6.98833	6.63002	7.33368	7.48981	7.37446	7.46923	7.47793	7.51493	7.37563	7.40842	7.3936	7.29633	7.31895	6.93063	7.36124	7.50047	7.40374	7.48579	7.46309	7.46898	7.31473	7.37785	7.4325	7.2632	7.25476	7.59897
GL50803_17119	7.35454	7.35942	7.38834	7.52635	7.45575	7.49629	7.60125	7.68402	7.65976	7.6473	6.6623	7.41354	7.51873	7.55205	7.62069	7.42452	7.51631	7.45673	7.49552	7.5159	7.5973	7.64586	7.37136	7.30726	7.478	7.56383	7.49533	7.65676	7.7413	7.72943	7.76464	7.82076	7.88512	8.09999	7.40099
GL50803_11110	-0.0642346	-0.356752	0.197177	1.47245	2.64878	3.03931	3.73274	4.12574	3.99437	4.25568	3.61541	0.315923	0.828403	0.473444	0.744137	1.16828	1.61046	2.33727	2.70116	3.06947	3.96922	3.83213	4.08294	0.721864	-0.191881	0.535346	1.18595	2.73641	2.96195	3.80987	3.87861	4.48772	4.54729	4.96684	0.277912
GL50803_15342	6.07981	6.24054	6.08653	6.30425	6.40597	6.62485	6.86578	7.05304	7.00747	7.13951	6.71532	6.18013	6.39061	6.30724	6.28929	6.46405	6.48983	6.4917	6.67471	6.67057	6.91427	7.03189	6.76313	6.3613	6.50436	6.29859	6.44228	6.71737	6.68957	7.01913	6.92082	7.14967	7.57098	7.06021	6.5415
GL50803_11113	4.51728	4.46681	4.41989	4.5606	4.82267	5.00893	5.32817	5.45823	5.50085	5.63994	4.83081	4.22283	4.55832	4.50227	4.43597	4.79606	4.63498	5.00578	4.9354	5.21354	5.28836	5.46492	4.96432	4.22117	4.37489	4.38243	4.24204	4.61211	4.81337	5.16009	5.22067	5.46572	5.76953	4.8904	4.15385
GL50803_11114	4.22006	4.35985	4.3688	4.66441	4.97189	5.17101	5.30837	5.77076	5.69674	5.91505	4.30409	4.23877	4.22438	4.34335	4.14912	4.44803	4.41444	4.57667	4.83209	4.5867	5.02254	5.23991	4.14716	4.27974	4.39488	4.27854	4.26937	4.73093	4.80348	5.16379	4.91402	5.37409	5.58792	4.62149	4.00086
GL50803_15343	4.93695	5.05687	5.38073	5.6718	6.0169	6.1992	6.55201	6.74398	6.82172	7.00238	4.89072	5.0233	5.04881	5.20545	5.24856	5.50032	5.48371	5.77736	5.93295	6.18546	6.4077	6.57603	5.22952	5.00786	5.07978	5.28621	5.4912	6.07328	6.22168	6.57714	6.60002	6.90344	7.08323	6.06786	4.93716
GL50803_11116	6.97756	6.78627	6.84303	7.05787	7.36998	7.52069	7.85277	8.2167	8.18115	8.25106	8.5159	6.91957	7.07097	6.92826	6.94271	7.17773	7.20289	7.43708	7.50484	7.69611	7.87046	8.0023	8.71167	7.18474	6.94313	6.90271	6.97899	7.35578	7.70688	7.83915	8.07432	8.33048	8.23755	8.39493	7.11043
GL50803_11118	12.0007	11.9451	12.0822	12.1182	11.938	11.9171	11.6778	11.4761	11.3662	11.1748	10.0228	12.0607	11.0674	11.417	11.3881	11.2545	11.1776	11.1559	11.5932	10.7303	11.0257	11.0836	10.6638	11.2114	10.8063	11.2109	11.4603	11.2012	11.3262	11.3711	11.5436	11.2844	11.1426	9.77523	11.3642
GL50803_11120	2.93821	2.94902	3.22332	3.80798	4.63078	4.81602	5.70513	6.18686	5.98621	6.38544	8.51963	2.8395	3.13881	3.44562	3.11596	4.02264	3.85363	4.58264	4.7208	5.17811	5.61071	6.13693	7.86705	3.78372	3.62704	3.476	3.96475	4.71372	5.02829	5.65172	5.96819	6.8043	6.93837	7.23268	3.67935
GL50803_15344	6.13337	6.42335	6.50851	6.70096	6.89677	6.95445	7.10939	7.38984	7.39092	7.64634	7.67013	6.15829	6.1768	6.36325	6.49623	6.42459	6.38581	6.52543	6.59806	6.76409	7.07622	7.16502	7.98596	6.35535	6.70578	6.55115	6.67103	6.95866	6.9056	7.28274	7.0963	7.44986	7.80702	7.70113	6.43176
GL50803_17117	6.95195	7.14377	7.21475	7.43263	7.47061	7.64851	7.78959	8.11603	8.05207	8.29719	7.6103	6.92389	6.95224	7.03669	7.23545	7.10221	7.03385	7.04455	7.24073	7.15979	7.49069	7.63163	6.93972	6.6706	6.99696	7.20908	7.29855	7.46609	7.649	7.6049	7.77016	8.0719	8.04114	7.36569	6.84903
GL50803_17118	6.66484	6.75796	6.78381	6.83205	6.73316	6.75589	6.82012	7.05016	6.98834	7.02567	7.66278	6.81113	6.74958	6.76744	7.02978	6.8105	6.87355	6.67618	6.68333	6.58488	6.6846	6.80998	7.41004	6.70173	6.95327	6.9578	7.05836	6.9852	7.11462	6.90817	7.02259	7.12286	6.96096	7.63751	6.82915
GL50803_14651	5.91016	5.51952	5.37557	5.29726	5.30497	5.33739	5.57711	5.63911	5.60643	5.69041	6.90364	5.9245	6.03469	5.63348	5.5789	5.91339	5.83921	5.95362	5.89298	5.94705	5.93076	6.02716	6.0763	6.1934	5.4354	5.34065	5.31878	5.4484	5.67619	5.75475	5.90485	5.88758	5.9355	5.55795	5.83263
GL50803_8163	7.72352	8.00239	8.1495	8.3169	8.48357	8.56582	8.6176	8.57816	8.58366	8.43698	8.74385	7.84179	7.77762	7.88625	7.87951	7.82325	7.96603	7.99639	8.10068	8.21967	8.31317	8.27483	7.85348	7.71036	7.71702	7.84672	7.81046	7.94705	8.14086	8.32174	8.25771	8.23954	8.32745	7.73295	7.66321
GL50803_14650	7.06896	7.40529	7.37416	7.29886	7.2064	7.20439	7.17893	7.17055	7.26714	7.12031	7.34257	7.12437	7.15551	7.42365	7.28364	7.21012	7.17019	7.22721	7.25341	7.18772	7.13227	7.15913	7.42631	7.09788	7.50354	7.41734	7.22017	7.14833	7.26236	7.15276	7.16643	7.34378	7.16184	7.72678	7.0481
GL50803_8157	5.9088	6.20677	6.00856	5.92053	5.93616	5.92009	5.98344	6.0051	6.05717	6.00555	6.43687	5.82109	5.87945	6.00069	5.74218	5.95165	5.81346	5.81336	5.92637	5.86499	5.94586	5.82828	6.78852	5.68093	6.09701	5.90396	5.79779	5.74656	5.95402	5.94536	5.94014	6.12339	5.83747	6.96091	5.62766
GL50803_14649	7.74929	7.7501	7.7034	7.70822	7.68884	7.66988	7.72927	7.75003	7.78128	7.80423	8.21062	7.76784	7.64354	7.59678	7.61212	7.67138	7.60185	7.82654	7.82642	7.79144	7.84988	7.87677	7.25595	7.88382	7.72197	7.61652	7.60858	7.6172	7.78407	7.87827	7.74606	7.9472	7.90288	6.85175	7.65193
GL50803_14648	7.05854	6.98509	6.96071	6.90548	6.86441	6.91645	7.07837	7.22514	7.21119	7.31184	8.80128	6.98128	7.07044	7.03047	7.06461	7.11466	7.13311	7.24191	7.17725	7.31035	7.36204	7.41419	8.30028	7.14245	7.05097	6.98222	6.98783	7.0817	7.25194	7.20939	7.37825	7.63738	7.46554	7.85362	7.09115
GL50803_8152	7.86708	7.88055	7.84098	7.75803	7.90612	7.91049	8.08154	8.14652	8.10758	8.1751	8.98721	7.78829	7.84952	7.86128	7.82476	7.47407	7.34952	7.33905	7.41172	7.37889	7.52083	7.62504	7.84624	7.38478	7.57571	7.60199	7.37647	7.38869	7.47757	7.55184	7.67026	7.85993	7.80989	7.61245	7.47824
GL50803_17116	5.91289	5.95708	6.02185	5.9263	5.94263	6.00854	6.09164	6.13676	6.09956	6.24051	10.149	6.05291	6.32928	6.09589	6.13656	6.08215	6.25719	6.22773	6.15425	6.18076	6.07847	6.04817	9.27122	6.16066	6.1172	5.9139	5.93578	6.11866	6.01639	6.0167	6.14306	6.07608	6.04908	8.39147	6.01777
GL50803_8148	4.37828	4.46681	4.58121	4.66786	4.64989	4.86672	4.83922	4.82018	4.75371	4.81774	4.32905	4.37122	4.59987	4.63052	4.64622	4.60877	4.6477	4.65812	4.88467	4.92042	5.00343	4.8747	4.482	4.57696	4.75844	4.9638	4.73196	4.8926	4.70326	4.9141	4.56422	4.89265	5.23556	4.53625	4.5993
GL50803_14647	6.86315	6.96177	7.0007	7.10125	7.067	7.14078	7.24906	7.35623	7.36234	7.40282	7.14765	6.82901	6.93553	7.09208	7.13809	7.12307	7.13943	6.9274	7.02776	6.96456	7.05375	7.03773	6.90764	6.88268	7.10302	7.17021	7.17701	7.25479	7.28743	7.10204	7.31034	7.32414	7.24113	6.89885	7.05089
GL50803_8146	5.91289	6.14828	6.18433	6.31858	6.24141	6.185	6.19229	6.24437	6.33324	6.32121	6.42968	5.99425	6.13904	6.39002	6.39907	6.32695	6.34966	6.09613	6.14406	6.17982	6.13444	6.08026	5.71593	6.07333	6.38621	6.47009	6.42329	6.53996	6.32732	6.19737	6.11052	5.9278	6.32662	6.046	6.32377
GL50803_8145	5.26164	5.30563	5.48758	5.77137	6.2477	6.29592	6.4998	6.71376	6.76632	6.91593	5.0418	5.27787	5.36854	5.48082	5.72015	5.72224	5.86013	5.83729	5.99972	6.2069	6.53293	6.50012	5.33898	5.47545	5.49679	5.74041	5.98959	6.18988	5.92008	6.40715	6.17211	6.31183	6.78579	5.75136	5.53649
GL50803_17115	6.01153	6.04725	6.15297	6.19969	6.09916	5.94794	6.1565	6.18056	6.23557	6.41576	5.89448	5.99307	6.32132	6.27314	6.33439	6.59637	6.71148	6.66778	6.61618	6.7451	6.62255	6.65956	5.79155	6.61126	6.40357	6.4099	6.45254	6.56016	6.49579	6.54627	6.43124	6.4546	6.79742	5.84294	6.58764
GL50803_2217	5.54421	5.5922	5.52072	5.54247	5.67361	5.66575	5.86028	5.85493	5.96288	6.05743	7.79463	5.62276	5.7719	5.69774	5.70621	5.93826	5.9011	5.93507	5.88213	6.0046	6.03678	5.96959	7.27883	6.06918	6.02082	5.94574	6.01404	6.02177	6.06172	6.12133	6.12017	6.25666	6.20765	6.90494	6.10527
GL50803_89828	7.29416	7.33189	7.37091	7.45526	7.27879	7.22341	7.14737	7.1083	7.15642	7.06207	6.79138	7.41178	7.42771	7.38647	7.51712	7.41247	7.44811	7.29426	7.25551	7.17548	7.15193	7.13478	6.67693	7.33688	7.57096	7.50873	7.50973	7.37096	7.43774	7.30219	7.32334	7.44857	7.1513	6.76877	7.46785
GL50803_13196	7.09379	6.96046	6.99818	6.9515	6.832	6.78141	6.74512	6.65514	6.79366	6.69392	5.88399	7.06972	7.19961	7.00472	7.08953	7.01563	7.07022	6.89896	6.8118	6.84955	6.76624	6.87218	6.2545	7.00382	6.89307	6.93845	6.84526	6.93038	6.96729	6.75152	6.8326	6.78733	6.61733	6.57327	7.11753
GL50803_21133	6.20516	6.4328	6.43714	6.47642	6.45026	6.50788	6.48704	6.45391	6.49688	6.49102	5.72382	6.18116	6.11468	6.25384	6.3371	5.82765	5.77454	5.49969	5.5888	5.70123	5.59803	5.588	5.42784	5.46602	6.09599	6.22264	6.05948	5.83808	5.83884	5.76453	5.8007	5.75135	5.80454	5.22597	5.68139
GL50803_89845	6.12046	6.44313	6.6274	6.72103	6.69686	6.80982	6.70507	6.71448	6.61348	6.72573	5.38902	6.06525	6.30077	6.44721	6.56735	5.91339	5.83254	5.68599	5.88485	5.82093	5.90138	5.90579	5.17409	5.29198	6.04737	6.3635	6.14944	6.04833	5.8181	6.11656	5.91486	5.85797	6.22499	5.74594	5.56015
GL50803_114089	4.75453	4.89665	5.23997	5.2451	5.7641	5.87834	6.19327	6.50187	6.6312	6.62552	7.60903	4.57333	4.11808	4.59108	4.55273	4.54248	4.52616	4.66938	5.05373	4.8151	5.38567	5.5848	6.82006	4.32216	4.57208	4.79925	5.04374	4.99112	5.08454	5.61026	5.65564	5.6102	5.97588	7.37185	4.39808
GL50803_101496	6.24895	6.17669	6.10538	6.19969	6.50201	6.47044	6.68428	6.79985	6.74889	6.78907	6.57761	6.31782	5.80653	6.03388	5.96456	6.07095	6.01941	6.25417	6.3802	6.23349	6.53043	6.70658	7.03615	6.27665	6.13513	6.10608	6.32623	6.37825	6.4608	6.66664	6.88278	7.1926	7.04524	7.33176	6.33372
GL50803_6982	6.26823	6.04971	5.96794	6.04115	6.23615	6.18614	6.27158	6.4007	6.45529	6.41651	5.44717	6.25454	6.21837	5.93556	5.8876	6.17734	6.21677	6.39828	6.34902	6.69254	6.64815	6.66788	5.75767	6.44046	6.1548	5.86478	5.85174	6.00064	6.32213	6.44872	6.43666	6.72877	6.55244	5.63904	6.18099
GL50803_14333	5.14827	5.55112	5.43886	5.12725	4.93601	4.67846	4.61142	4.59552	4.71965	4.87342	4.59393	5.35851	5.50291	5.73023	5.56816	5.34666	5.20421	5.02345	4.8928	4.75562	4.74325	4.58951	4.50668	5.25231	5.66806	5.68053	5.244	5.05629	4.74004	4.64413	4.40283	4.41531	4.50377	4.77288	5.43064
GL50803_6980	6.76326	6.88325	6.82609	6.70012	6.60681	6.59681	6.63527	6.68215	6.82542	6.78384	7.74912	6.79909	6.99847	6.92155	6.89681	6.90586	6.84178	6.79412	6.76237	6.89964	6.68235	6.7414	6.86053	6.84802	6.98877	6.99515	6.79979	6.75781	6.70427	6.57853	6.75422	6.74434	6.50907	6.608	6.85063
GL50803_16049	5.87566	6.11225	6.20342	5.94491	5.96824	5.86344	6.01598	6.12368	6.09956	6.254	6.56978	5.9634	6.15207	6.29974	6.21248	6.22773	6.26051	6.17336	6.2364	6.27291	6.17023	6.17033	5.26854	6.22542	6.24747	6.23061	6.27225	6.25973	5.99916	6.15242	5.67803	5.83964	6.05016	5.30907	6.11684
GL50803_16050	7.83583	7.86875	7.99507	8.11878	8.02648	8.24306	8.34381	8.46996	8.4402	8.44104	8.52942	8.11063	8.10612	7.99951	8.30529	8.19866	8.13484	7.98178	8.01451	8.05029	8.27533	8.35196	8.3709	7.92941	8.30878	8.38309	8.49222	8.48841	8.50049	8.48603	8.67203	8.86884	8.77385	8.16126	8.46482
GL50803_92760	8.18092	8.11239	8.02136	8.02741	8.0019	7.98811	8.18238	8.33583	8.33423	8.47689	7.58138	8.339	7.672	7.69379	7.65121	7.58811	7.43753	7.44448	7.59397	7.48876	7.87376	8.12109	7.16194	7.63454	7.50047	7.61766	7.65336	7.71342	7.90874	8.13583	8.28435	8.61254	8.74209	6.89641	7.7515
GL50803_4764	0.0190635	-0.25609	0.454066	0.750312	1.59567	1.8193	2.3452	2.666	2.86199	3.10133	1.2814	-0.181584	0.245619	-0.473179	0.0932158	0.570687	0.51047	0.952421	1.47239	1.87065	2.77408	3.00424	1.41963	0.280497	-0.27364	0.187481	0.770979	1.81358	1.66854	2.58121	2.40508	3.02819	3.91579	2.64544	0.0591702
GL50803_23833	9.75295	9.92615	9.8711	9.76347	9.56177	9.42819	9.35438	9.1598	9.24031	9.09862	7.24267	9.78618	10.1214	10.3012	10.1307	9.56783	9.26119	8.84248	8.79353	8.66324	8.71009	8.57967	8.08833	8.8425	9.80059	10.0156	9.36385	9.0542	8.69753	8.71527	8.70574	8.72843	8.80956	7.98694	9.4141
GL50803_4767	7.43921	7.61043	7.77383	7.79715	7.76788	7.77657	7.72011	7.61444	7.78033	7.64282	6.81255	7.49627	7.81244	7.85265	7.83088	8.09816	8.25739	8.39335	8.4277	8.42353	8.15898	8.21053	7.3212	8.03201	7.92287	7.77933	7.92138	8.08812	8.19058	7.99484	8.15726	8.20851	7.9462	6.97486	7.5875
GL50803_4768	5.83313	5.61398	5.80644	6.10234	6.4719	6.64491	6.95646	7.27379	7.26623	7.32548	5.93569	5.71824	5.8637	5.7358	5.86017	6.0862	6.22868	6.35706	6.45348	6.56984	6.8865	6.94244	6.40437	5.84266	5.76594	5.9578	6.21416	6.55775	6.74233	6.78075	7.07661	7.36956	7.28035	7.02041	5.99866
GL50803_33672	5.28287	6.63883	8.06776	8.59914	9.06854	9.38413	9.40747	9.42448	9.47702	9.2308	8.46473	5.52051	5.3285	6.32307	7.38424	7.64964	7.92454	7.88178	8.38703	8.29777	8.44385	8.227	10.0978	5.57966	6.62348	7.75672	8.48787	8.75555	8.77173	8.77761	8.72452	8.66143	8.70517	11.5973	5.71106
GL50803_8074	8.06412	8.51132	8.6532	8.76233	9.05277	9.14534	9.34921	9.46932	9.56643	9.46522	8.01348	8.23481	8.35175	8.51848	8.49559	8.77508	9.0747	9.14833	9.26981	9.44652	9.45972	9.40133	7.95115	8.63924	8.81897	8.78221	8.91614	9.16189	9.53003	9.58573	9.4715	9.60635	9.60233	8.34836	8.60855
GL50803_8075	5.73491	6.01614	5.9645	5.88688	5.86842	5.76149	5.85036	5.91182	6.02963	5.94134	5.22915	5.90715	5.93617	6.10669	6.1846	6.37577	6.42847	6.4301	6.27527	6.34279	6.13992	6.09604	5.76109	6.34081	6.51885	6.43082	6.46272	6.4886	6.35044	6.27559	6.2681	6.12447	6.12491	6.5455	6.49928
GL50803_14627	5.05019	5.0322	4.91263	4.76125	4.69659	4.71212	4.78555	4.55388	4.6209	4.56797	4.53078	5.02789	5.02067	5.0214	4.89259	5.02438	5.01092	5.30029	5.1809	5.32856	5.2279	5.3073	4.66129	5.05892	4.82378	4.95661	4.61203	4.83009	4.92483	4.85578	5.10881	5.27429	4.93677	4.2377	4.77136
GL50803_8078	6.18951	6.38489	6.30476	6.16227	5.9733	5.81558	5.65328	5.42486	5.51772	5.38339	6.89217	6.27401	6.01946	6.24018	6.05532	5.73907	5.62683	5.53862	5.69799	5.62711	5.3671	5.14123	5.82793	5.72639	5.98061	5.88134	5.76387	5.59345	5.5867	5.1985	5.48393	5.03753	4.85501	5.12949	5.65843
GL50803_14628	8.09384	7.98771	8.12353	8.05402	7.65574	7.50866	7.16499	6.91565	6.73388	6.80519	6.28888	8.27787	7.66188	7.72426	7.84494	6.78891	6.45911	5.7391	5.79372	5.2117	5.37642	5.0539	5.36171	5.9704	6.84	7.27371	6.76524	6.35531	5.84005	5.44968	5.55679	5.1523	5.27863	4.70755	6.63669
GL50803_42676	7.05793	7.25242	7.11751	7.10508	6.90475	6.7727	6.63093	6.62992	6.63472	6.63393	6.61361	7.15462	7.13748	7.31703	7.31521	6.99476	7.05454	6.77599	6.67942	6.72327	6.75342	6.61488	6.32561	6.98909	7.23637	7.34157	7.07615	7.06427	6.91597	6.77167	6.60622	6.49028	6.6576	6.67362	7.17741
GL50803_16537	6.57565	6.72216	6.57651	6.54181	6.53323	6.48581	6.50455	6.44255	6.62485	6.67022	5.26192	6.59594	6.62501	6.83263	6.58574	6.53024	6.47277	6.4677	6.44152	6.49528	6.67407	6.70951	5.86976	6.55457	6.61072	6.52868	6.41545	6.4776	6.49349	6.68994	6.44896	6.65432	6.84117	5.77547	6.36017
GL50803_33674	6.51237	6.55213	6.5226	6.56419	6.35641	6.28478	6.27807	6.26039	6.26311	6.17111	5.73787	6.58585	6.78925	6.76812	6.82381	6.78953	6.80363	6.67618	6.53366	6.59056	6.56912	6.4378	5.77132	6.8738	7.05411	7.00391	6.9112	6.91666	6.72736	6.61347	6.59242	6.33819	6.51456	6.33269	7.06336
GL50803_2779	6.50336	6.44407	6.39945	6.39447	6.13239	6.03411	5.94082	5.75671	5.9011	5.82076	6.075	6.58507	6.70879	6.51768	6.73461	6.67111	6.7139	6.51532	6.43504	6.37197	6.24535	6.2551	6.14344	6.6706	6.87124	6.73621	6.73685	6.60207	6.37738	6.07194	6.27244	6.14487	5.98042	7.00463	6.88903
GL50803_13127	7.28262	7.35146	7.32876	7.33944	7.15046	7.18597	7.07944	6.96841	7.13272	6.91328	9.01271	7.40517	7.53488	7.40233	7.36574	7.62548	7.67702	7.78926	7.83453	8.06031	7.63504	7.64586	8.28371	7.69564	7.5581	7.4608	7.45381	7.5112	7.76412	7.6225	7.60854	7.37275	7.15532	7.57859	7.45913
GL50803_2777	5.05514	4.71017	5.01919	4.78368	4.63398	4.68332	4.72439	4.73962	4.76916	4.76925	4.17924	4.97415	5.20314	5.0305	5.06196	5.32796	5.39592	5.48701	5.41153	5.46789	5.31574	5.35305	4.4985	5.56796	5.11233	5.07652	4.9455	5.14027	5.18323	5.02412	5.20987	5.17127	4.9132	4.42549	5.37539
GL50803_16535	6.81079	6.97023	6.86809	6.71687	6.49057	6.40628	6.16853	5.97386	5.96512	5.74994	5.82599	7.00769	7.07991	7.05799	6.99981	7.10221	7.16179	7.07981	6.94417	7.06087	6.69283	6.67315	5.8082	7.27343	7.32973	7.02527	7.00535	6.9047	6.9871	6.58959	6.56936	6.46488	6.23643	6.01483	7.26201
GL50803_16534	6.97495	6.86171	6.8909	6.90402	6.54434	6.59552	6.37643	6.09382	6.15649	6.03904	8.77881	7.16769	7.37568	7.08664	7.3781	7.27767	7.375	7.13725	6.9132	6.77599	6.54454	6.4182	7.29782	7.24156	7.41171	7.34295	7.46399	7.22524	7.01577	6.69506	6.72921	6.25468	6.19402	7.18046	7.60151
GL50803_16533	6.87228	6.91935	7.01738	7.10952	7.05331	7.05406	6.91779	6.74327	6.71605	6.64932	6.5854	7.19092	7.15451	6.95061	7.06461	7.22352	7.14976	7.09661	7.04184	6.92742	6.83338	6.63817	6.18991	7.14738	6.86946	7.14721	7.28426	7.22068	6.93423	6.96975	6.70377	6.39039	6.79549	6.29426	7.22383
GL50803_16532	9.72056	9.62921	9.41374	9.64496	8.76261	8.60282	8.05802	7.59484	7.41814	7.13359	7.47776	10.0417	9.57782	9.27253	9.28983	9.01689	8.67728	8.31277	8.22126	7.8489	7.60049	7.4227	6.85092	8.62501	8.88361	9.19143	8.88003	8.66444	8.33711	7.77281	8.02278	7.52348	7.32524	6.65785	9.16746
GL50803_113319	5.93182	4.93973	5.52306	5.94775	6.37759	6.47185	6.24816	6.40971	6.0965	6.17377	5.63153	5.33646	5.4568	4.99374	5.31067	5.43985	5.40794	5.44008	5.98077	5.54311	5.97558	6.13802	6.38007	5.27228	4.44046	5.10717	5.68488	5.70216	5.91779	6.23657	6.26897	6.3213	6.43321	6.78338	5.46865
GL50803_6920	6.00516	6.1228	6.17989	6.08954	6.21919	6.19353	6.19131	6.21076	6.19895	6.14148	5.45286	6.13186	6.01508	6.24702	6.37812	6.47414	6.54665	6.50827	6.47981	6.61517	6.74841	6.71609	6.08725	6.66306	6.65421	6.45825	6.68052	6.76757	6.82536	6.86788	6.83143	6.70438	6.88847	6.87673	6.66364
GL50803_6919	5.15289	5.16294	5.38331	5.28383	5.29084	5.34865	5.35649	5.20659	5.2974	5.14178	5.26516	5.29893	5.20122	5.37939	5.47423	5.54074	5.7582	5.68182	5.67146	5.77673	5.76193	5.69844	5.37071	5.73688	5.7938	5.55751	5.6659	5.74232	6.01532	5.77547	5.70521	5.45544	5.47815	5.75944	5.77537
GL50803_6918	6.06028	6.03116	6.19464	6.34253	6.55621	6.63909	6.63888	6.66419	6.67356	6.50025	4.98796	6.14672	6.33983	6.19939	6.39038	6.57129	6.72295	6.7477	6.8589	7.08625	6.99751	7.01123	5.51561	6.62897	6.44889	6.4446	6.59205	6.74516	6.92228	7.02576	6.82966	6.95482	6.8921	6.1825	6.63174
GL50803_6917	7.74279	8.00683	8.06174	8.22241	8.12567	8.22832	8.13181	7.9905	8.14038	7.83793	7.95505	7.71682	7.9077	7.89967	7.92955	8.1803	8.29427	8.45508	8.60785	8.5993	8.3517	8.27309	9.78776	8.04447	8.07306	7.92837	8.17211	8.33952	8.53772	8.25214	8.35918	8.2057	7.799	11.0055	7.85424
GL50803_14322	5.81431	5.8168	5.88491	5.85092	5.62453	5.41633	5.12504	4.95917	4.9608	5.09196	3.42016	5.94043	6.29446	6.248	6.32621	6.30973	6.31178	5.98101	5.86708	5.69333	5.40764	5.10827	3.88372	6.09286	6.3259	6.34617	6.16823	6.10553	5.56783	5.25687	5.14896	4.82771	4.79952	4.42549	6.41166
GL50803_14321	9.28031	9.22445	9.23982	9.12559	8.88512	8.82493	8.66578	8.26985	8.4134	8.16308	7.7766	9.14699	9.43292	9.32664	9.2263	9.54041	9.5374	9.63738	9.55398	9.77557	9.46387	9.40541	8.58987	9.40882	9.04525	8.9931	8.86363	9.03542	9.1966	8.92166	9.27981	9.41614	8.86467	7.83844	9.08954
GL50803_17291	4.46625	4.65307	4.59461	4.53438	4.71486	4.86245	4.92682	4.86801	4.94274	4.86245	3.52109	4.38919	4.61732	4.72044	4.58964	4.78363	4.8725	5.0603	5.08718	5.14179	5.3426	5.29368	4.22857	5.00135	5.00806	4.80994	4.86588	4.92785	4.93393	5.20211	4.95557	5.1136	5.26006	4.73513	4.62196
GL50803_2509	4.67328	4.87739	4.99917	5.01797	4.95918	5.0256	5.10013	5.061	5.14186	4.99085	4.1929	4.98128	5.03373	5.15848	5.19566	5.40459	5.45359	5.48223	5.57033	5.75158	5.59803	5.49244	4.40529	5.35292	5.29712	5.14142	5.37379	5.38458	5.5722	5.4871	5.54967	5.51606	5.34531	4.3055	5.19905
GL50803_2508	6.33477	6.27669	6.21359	6.18532	6.23721	6.14448	6.06078	6.03683	5.995	5.95689	4.99967	6.25552	6.09509	6.1801	6.05532	6.25318	6.15483	6.32268	6.4544	6.1864	6.26052	6.33706	5.29713	6.39729	6.22066	6.22763	6.3141	6.21456	6.40464	6.33016	6.50748	6.42241	6.31677	5.54242	6.31452
GL50803_137718	6.81516	6.91666	7.00907	6.90621	6.80455	6.75627	6.63527	6.48748	6.57882	6.49812	4.56795	6.99835	7.24381	7.11098	7.22961	7.09116	7.1671	7.10285	6.97449	7.16979	7.00834	6.92425	5.06195	7.21413	7.18803	7.26208	7.31081	7.24034	7.11462	7.11835	6.82141	6.83965	6.97298	5.47531	7.29881
GL50803_32607	3.9968	3.91791	4.2886	4.2046	4.70271	4.46378	4.44665	4.45294	4.1984	4.47312	4.035	3.86026	4.34449	4.48582	4.60475	4.3604	4.28358	4.36079	4.39419	4.35584	4.79418	4.75768	4.52291	4.17947	3.93976	4.36079	4.47117	4.51279	4.22119	4.53971	4.1588	4.36493	4.84508	5.3054	4.06843
GL50803_137717	4.91265	5.09786	5.00587	5.30835	5.80589	5.77217	6.05647	6.24337	6.0189	6.2422	6.97753	4.87309	7.52567	6.19231	5.66357	5.67459	5.49502	5.62218	5.93689	5.76672	6.2372	6.27107	9.52845	4.83797	5.10021	5.20555	5.29618	5.48943	5.58237	5.75475	6.13832	6.35211	6.30414	7.39969	4.94916
GL50803_9718	5.20718	5.37986	5.24565	5.12725	5.26421	5.27226	5.39966	5.48404	5.46334	5.4683	5.44432	5.33831	5.29816	5.41284	5.26766	5.50487	5.46944	5.55238	5.49756	5.70123	5.69502	5.86427	5.8824	5.60135	5.51669	5.32584	5.21618	5.25575	5.38416	5.51636	5.50028	5.71877	5.63623	5.53302	5.23543
GL50803_9719	9.3933	10.3697	10.4092	10.4041	10.4271	10.4156	10.468	10.5608	10.6319	10.5274	9.37728	9.41024	9.28496	10.2943	10.2415	10.0328	9.94987	9.90063	9.99642	9.89976	10.029	9.97445	9.07057	9.20502	10.1033	10.2015	10.0383	9.92915	9.96305	9.99479	9.97787	10.1382	9.96214	8.31265	9.0244
GL50803_9720	9.1606	9.16612	9.12846	9.1006	8.69903	8.59961	8.34448	8.12781	8.11087	8.05189	10.5	9.371	9.2222	9.17226	9.35079	8.93851	8.90898	8.4638	8.36941	8.28883	8.09808	7.8849	8.1756	8.76084	9.10675	9.06052	9.05975	8.71666	8.6133	8.33453	8.42605	7.98849	7.99249	7.77408	9.06275
GL50803_17288	6.83613	6.82628	6.9676	6.75953	6.45841	6.34374	6.02593	5.56688	5.65437	5.4287	6.0676	6.93677	6.88959	6.81562	7.0281	6.56622	6.67029	6.27829	6.24912	6.26671	6.15299	5.97934	6.34855	6.49632	6.8278	6.92684	6.73964	6.58403	6.48112	6.17644	6.17489	5.84621	5.89396	6.46542	6.7393
GL50803_9722	6.39546	6.22647	6.27731	6.30203	6.37376	6.39547	6.4766	6.36596	6.45449	6.29209	7.52983	6.41134	6.6556	6.39178	6.40512	6.51153	6.60262	6.6887	6.58975	6.76346	6.6718	6.83236	6.97258	6.5434	6.45762	6.3851	6.27225	6.46566	6.46316	6.56879	6.58686	6.7116	6.58264	6.77543	6.56183
GL50803_93294	5.74259	5.83688	5.62891	5.84025	5.96824	6.00142	6.01042	6.09046	5.85115	6.04875	7.19169	5.55116	5.67107	5.87368	5.85133	5.80938	5.81007	5.74843	5.8449	6.10632	5.98048	5.90834	7.01336	5.66179	5.76466	5.58109	5.68343	5.79509	5.95849	5.905	6.11149	6.02254	5.84372	6.89397	5.56015
GL50803_15022	6.2107	6.27143	6.02515	5.97307	6.06278	6.00983	6.19719	6.14433	6.28657	6.24389	5.8499	6.27304	6.50516	6.25287	6.28648	6.32952	6.43729	6.47092	6.35884	6.38266	6.35024	6.38372	5.80489	6.55085	6.50666	6.27371	6.20206	6.29391	6.42414	6.38433	6.46646	6.55511	6.39032	5.72133	6.51012
GL50803_15023	7.10158	7.02001	6.96502	6.9444	7.36276	7.36617	7.70642	7.85662	7.96556	8.00579	6.50417	7.01696	7.34503	7.09805	6.98949	7.22811	7.24579	7.46968	7.51453	7.8025	8.00956	8.06864	7.65427	7.60227	7.41497	7.32676	7.27658	7.41466	7.59408	7.89535	7.8776	8.06177	8.11609	7.23268	7.34797
GL50803_17286	6.50065	6.44873	6.22799	6.20445	5.87385	5.80299	5.81636	5.85889	5.96959	5.93717	5.67111	6.45293	6.8842	6.55679	6.53932	6.61822	6.66779	6.55231	6.4753	6.60257	6.39309	6.32467	5.5945	6.72167	6.69843	6.43773	6.31691	6.16477	6.2383	6.11561	6.01962	5.90153	5.87089	5.45886	6.58956
GL50803_20472	3.19262	3.32711	3.01314	3.03175	3.37872	3.33514	3.60872	3.88351	4.05867	4.22519	2.77109	3.36033	3.67708	3.4388	3.38454	3.60362	3.67122	3.92133	3.64538	4.08087	4.0645	4.34354	3.2067	3.80382	3.58707	3.42129	3.43372	3.27138	3.25846	3.71211	3.20753	3.58204	3.92053	3.83043	3.63051
GL50803_17285	7.66046	7.45671	7.70546	7.72571	7.7488	7.74148	7.74643	7.69031	7.80865	7.95172	6.62373	7.68699	7.96901	7.82382	7.96335	7.91779	8.10355	8.14127	8.05039	8.28028	8.2525	8.35851	7.13712	8.11579	7.79648	7.99691	7.96293	8.07779	8.10026	8.11183	7.99918	8.14142	8.12817	7.17544	7.88424
GL50803_17284	7.30509	7.26359	7.1283	7.01923	6.86578	6.73265	6.68288	6.53352	6.61775	6.51573	6.33889	7.35714	7.38887	7.36594	7.3684	7.36656	7.39703	7.3592	7.16555	7.21925	6.94527	7.00766	6.3689	7.5078	7.52599	7.39844	7.32204	7.27057	7.30375	6.99075	7.17339	6.9615	6.83366	6.52983	7.5532
GL50803_14859	11.0489	10.9288	10.7726	10.8401	10.3517	10.0555	9.86774	9.60105	9.52711	9.39142	8.77171	11.4448	10.8969	10.7826	10.7341	10.1508	9.81174	9.38107	9.26578	8.7248	8.82714	8.48268	9.2372	9.63353	9.92706	10.3374	9.85334	9.62308	9.27814	8.94026	9.03759	8.44425	8.60372	8.6437	10.2925
GL50803_14858	5.44791	5.23389	5.23142	5.29503	5.68909	5.75612	5.91843	6.01929	5.96176	5.93088	5.67841	5.45037	5.48083	5.33783	5.33443	5.33479	5.47087	5.59141	5.76301	5.8755	6.05546	6.15534	5.46191	5.48326	5.34584	5.22164	5.30941	5.42392	5.67347	6.08762	5.90819	6.08611	6.12901	5.84294	5.43064
GL50803_9079	6.21292	6.0324	6.18581	6.23501	6.09684	6.06917	5.94082	5.60031	5.71548	5.50824	6.31254	6.33738	6.43063	6.20744	6.39299	6.58209	6.57757	6.72358	6.53019	6.54956	6.28447	6.0666	7.68073	6.50402	6.21505	6.36078	6.39786	6.53914	6.56038	6.14775	6.34664	6.09276	5.84746	8.02096	6.60101
GL50803_14857	6.54436	6.47826	6.32902	6.35863	6.21492	6.15209	6.06829	6.08934	6.2169	6.14601	6.5553	6.48169	6.50204	6.49485	6.42993	6.39223	6.42033	6.35095	6.18877	6.27645	6.10896	6.08817	6.11962	6.4316	6.5362	6.49348	6.29618	6.39724	6.38403	6.24008	6.34582	6.29752	6.0577	6.05478	6.51618
GL50803_9077	6.94264	7.01309	7.05019	7.04334	6.95748	6.87813	6.8559	6.827	6.89281	7.01135	5.92958	6.93982	7.07623	7.10237	7.28552	6.86104	6.75447	6.61557	6.52235	6.55247	6.60364	6.4693	5.84739	6.65409	6.99696	7.16813	6.92415	6.92727	6.68554	6.7198	6.53587	6.41624	6.82484	6.12527	6.97956
GL50803_14856	6.90139	7.09696	7.16844	7.16428	7.0237	7.13044	6.87683	6.70574	6.72466	6.4608	4.55214	6.99425	7.1972	7.21394	7.15973	7.35947	7.54822	7.52306	7.6482	7.7177	7.4476	7.45977	5.68381	7.32432	7.32453	7.16397	7.17495	7.22575	7.50949	7.19182	7.19638	7.13901	6.76487	5.90254	7.16632
GL50803_14855	8.00788	8.09225	8.01846	7.94486	7.9674	7.98056	8.08656	8.12125	8.18907	8.19075	7.18316	8.12383	8.29438	8.20918	8.30089	8.24062	8.2576	8.07873	7.95525	8.04176	7.98206	7.92237	7.22405	8.1586	8.43036	8.39844	8.29641	8.17531	7.96447	8.02315	7.824	7.70366	8.00397	7.51716	8.29834
GL50803_9073	4.7994	4.91835	4.83193	4.65401	4.56181	4.70259	4.69142	4.67535	4.71433	4.68711	6.91605	4.81313	4.97629	4.85461	4.78531	4.84709	4.82399	5.01022	4.88195	4.83918	4.78021	4.88252	6.23985	4.83797	5.07978	4.84673	4.84268	4.70213	4.78599	4.59835	4.82005	4.53079	4.61898	5.89278	4.8179
GL50803_9072	3.60356	3.86302	3.78746	3.73092	3.43857	3.08407	3.10692	2.666	2.57599	2.65952	1.55967	3.81844	3.68814	3.79982	3.71479	3.7436	3.56252	3.55282	3.20633	3.32953	3.09614	2.92568	2.55814	3.64579	3.5519	3.81526	3.50114	3.6366	3.40309	3.25127	3.17087	3.03741	2.86799	2.21503	3.75876
GL50803_17283	7.93569	8.13805	8.18833	8.25259	8.10994	8.11171	8.113	8.08769	8.17221	8.15277	8.24832	8.00972	7.77956	7.90957	8.1198	7.53017	7.44265	7.18759	7.32476	7.28076	7.46473	7.38924	7.27644	7.24569	7.79146	7.93449	7.85785	7.65263	7.67365	7.67922	7.63368	7.34424	7.62385	7.448	7.49436
GL50803_6483	5.82881	5.53891	5.55083	5.57591	5.67205	5.69089	5.91129	6.01103	6.13875	6.21487	6.34196	5.73801	5.97504	5.52818	5.64323	5.93938	6.10125	6.35445	6.26696	6.46929	6.41223	6.58164	6.3531	6.27665	5.74403	5.42127	5.51912	5.79373	6.20298	6.26011	6.47701	6.74856	6.32305	5.99443	5.9744
GL50803_21156	5.93718	5.64522	5.79874	5.81714	6.01444	6.07226	6.02041	6.01811	5.96624	6.13511	4.95627	5.81446	6.10027	5.6805	5.87769	6.18397	6.24887	6.52232	6.4816	6.58131	6.51701	6.64967	5.38853	6.40636	5.98501	5.96738	6.17547	6.37095	6.42172	6.43577	6.43511	6.67662	6.75098	5.90497	5.82396
GL50803_6485	6.50155	6.32014	6.16948	6.14381	6.13691	6.16488	6.03691	5.99914	6.15158	6.09726	5.66622	6.50412	6.62501	6.37848	6.36043	6.57346	6.64258	6.75102	6.64374	6.63937	6.58769	6.66788	5.76792	6.79755	6.59281	6.27371	6.30658	6.44321	6.4819	6.40089	6.5495	6.62175	6.50198	5.94568	6.66788
GL50803_14223	6.71176	6.58642	6.57313	6.45162	6.13465	5.9825	5.94781	5.63605	5.73266	5.80824	6.87639	6.7699	7.01831	6.7749	6.7353	7.04715	6.92359	6.99334	6.7931	6.7323	6.41856	6.34463	6.13554	7.18282	6.98218	6.77491	6.70575	6.77035	6.5699	6.22864	6.36786	6.22775	6.03057	5.74323	7.09431
GL50803_6490	6.88552	7.03064	6.91959	6.85644	6.67836	6.61429	6.64248	6.75956	6.88278	7.04229	6.9026	7.01349	6.85078	6.97674	6.90903	6.8233	6.66153	6.54926	6.43597	6.38184	6.46819	6.4191	6.66784	6.73482	6.90183	7.00681	6.97306	6.76618	6.48345	6.44569	6.29646	6.05921	6.28499	7.29331	6.86969
GL50803_6492	6.39935	6.28611	6.24792	6.23965	6.113	5.91253	5.71883	5.43724	5.63623	5.46395	4.67404	6.60211	6.68899	6.4163	6.49055	6.74793	6.80249	6.84097	6.66683	6.41985	6.15623	6.08366	5.07851	7.16884	6.78174	6.56383	6.90933	6.93224	6.79134	6.39382	6.43588	6.05126	5.82868	5.77281	7.15557
GL50803_27880	3.33759	3.14583	3.12821	3.36497	3.46758	3.39163	3.35166	3.62353	3.64383	3.77004	2.73419	3.19041	3.46217	3.12712	3.29798	3.33739	3.64099	3.69193	3.71428	4.04819	4.05525	4.11923	2.31889	3.79381	3.29968	3.19542	3.31132	3.51603	3.51647	3.7764	3.55354	3.54374	3.82776	2.52419	3.49521
GL50803_17280	6.2511	6.05951	6.15899	6.17687	6.13239	6.1214	5.93848	5.84435	5.94145	6.02239	7.4875	6.29513	6.54218	6.25481	6.34522	6.5384	6.62081	6.65366	6.55857	6.7952	6.58206	6.58164	6.49969	6.72431	6.4718	6.35075	6.49533	6.55211	6.5545	6.36997	6.45659	6.55431	6.23738	6.20239	6.68173
GL50803_17279	6.34086	6.33433	6.28973	6.24659	6.05921	6.00013	5.94898	5.63451	5.7048	5.6335	6.2205	6.50988	6.63075	6.60785	6.61885	6.62311	6.69992	6.66003	6.57803	6.52007	6.25549	6.21746	5.64727	6.78686	6.84303	6.7432	6.8038	6.74092	6.68621	6.36355	6.46192	6.33071	6.14123	5.75136	6.85116
GL50803_17278	7.23005	7.15524	7.0099	7.02328	6.6125	6.62611	6.51165	6.52111	6.50843	6.42622	8.17621	7.41617	7.40654	7.12857	7.15615	7.2504	7.15868	6.88815	6.94482	6.68658	6.43559	6.34934	6.87798	7.27208	7.48034	7.18465	7.2061	7.01711	6.88698	6.48099	6.5938	6.45803	6.17334	6.33629	7.5049
GL50803_13523	3.86792	3.65901	3.92114	3.93367	4.20057	4.19796	4.53294	4.73962	4.91985	5.06925	6.49317	4.25454	4.15837	4.02144	4.10306	4.38364	4.32537	4.37463	4.28312	4.57241	4.63255	4.68502	5.662	4.50513	4.07803	4.1244	4.18167	4.36997	4.3286	4.63882	4.10539	4.25858	4.71753	5.23759	4.51032
GL50803_17277	8.63225	8.85425	8.78741	8.64362	8.20401	7.98598	7.70951	7.42491	7.45523	7.27137	7.7217	8.82704	8.95933	9.01435	8.90581	8.79193	8.68161	8.44385	8.19136	7.93465	7.6296	7.53281	9.51811	8.62413	8.91003	8.88686	8.63471	8.49136	8.19745	7.70581	7.84713	7.63016	7.34652	9.88011	8.84939
GL50803_17276	5.21824	4.83237	5.06163	4.97126	5.13225	5.19388	5.13529	5.12583	5.08331	4.94793	3.57425	4.79437	5.04452	4.90002	4.77733	5.17466	5.20249	5.40343	5.65403	5.65992	5.56419	5.69549	4.78755	5.42119	4.98408	4.85191	4.9455	5.1658	5.36074	5.15638	5.45982	5.49446	5.30059	5.18655	5.00387
GL50803_13524	5.83025	5.90096	5.91371	5.96608	5.90335	5.87127	5.89086	5.76375	5.9139	5.75824	5.38307	5.9059	6.16696	5.8222	5.9528	6.28173	6.25137	6.32625	6.23959	6.2676	6.04732	5.99986	7.49578	6.29007	6.16356	6.05758	6.12186	6.2166	6.4201	6.06799	6.17951	6.00267	5.71605	8.28586	6.42819
GL50803_13525	4.42866	4.40666	4.55859	4.62945	4.51045	4.49542	4.72981	4.73962	4.81207	4.77627	3.4771	4.70252	4.80414	4.45235	4.55273	4.93059	5.05934	5.03874	5.01949	5.09055	4.91926	5.20499	4.60904	4.95492	4.86973	4.76396	4.81909	4.9574	4.86899	5.04233	4.74221	4.86184	4.85995	5.33454	4.99425
GL50803_103895	3.5625	2.83954	3.16462	3.13506	3.7592	3.49837	3.86183	3.67822	3.73584	3.99153	2.67701	3.82901	3.99445	2.97514	3.36338	3.41676	3.66622	3.76203	3.40129	3.57869	3.74595	3.78284	3.0135	4.20237	3.47263	3.56069	3.50772	3.69038	3.47343	3.6501	3.31898	3.37945	3.80745	3.79941	4.37455
GL50803_4059	6.53112	6.06317	6.27176	6.24889	5.90335	5.71164	5.50145	5.32557	5.21139	5.04617	4.42478	6.5749	6.74892	6.45399	6.38163	6.23322	6.02819	6.02005	5.79517	5.70255	5.51612	5.3846	5.05639	5.98147	5.92328	6.33604	5.83876	5.73238	5.61668	5.1967	5.48393	5.49613	5.11264	5.0614	6.32377
GL50803_137716	10.3987	10.4313	10.3987	10.3409	10.8849	10.7902	10.9819	11.1781	10.763	10.9245	10.4516	9.97557	6.5738	8.23795	7.98285	7.5831	7.02607	7.17973	9.45885	5.8871	8.07051	9.48707	10.4951	7.91158	7.78296	8.65352	9.06115	7.76376	8.41859	9.47431	9.75432	9.12907	9.66162	10.8306	8.69422
GL50803_60256	7.22896	7.43005	6.9249	6.99128	7.4163	7.42486	7.62291	7.78402	7.66562	7.75023	6.40201	7.09347	6.68692	7.1222	6.71107	6.76193	6.61693	6.97132	7.38123	7.03505	7.59331	7.93777	7.90159	7.08818	7.21732	6.88702	6.99428	6.80733	6.97006	7.51897	7.41399	7.70764	7.8245	6.89519	6.70197
GL50803_111906	5.76237	5.92528	5.67591	5.76655	5.94521	5.85844	6.0026	6.11159	6.10768	6.16309	5.25543	5.69098	5.36683	5.69631	5.44263	5.5259	5.40044	5.49495	5.77038	5.68538	6.0238	6.23284	6.61583	5.72902	5.79255	5.62412	5.74869	5.56335	5.66939	6.09927	6.01342	6.25764	6.30142	5.69909	5.57184
GL50803_33978	4.37828	4.08073	3.96308	3.85716	3.81106	3.79614	3.68329	3.33672	3.22533	3.20219	1.79285	4.119	2.53809	2.87763	2.66404	2.72905	2.65797	2.74133	3.82605	2.5333	3.14927	4.08349	3.37706	3.19153	2.82734	2.93727	2.78167	2.54211	3.09771	3.10487	3.7403	3.66171	3.34755	2.82045	3.13097
GL50803_3910	9.53059	8.98694	9.05864	9.10442	8.8228	8.79775	8.39484	8.11521	8.06125	7.77383	6.44117	9.4177	7.64603	8.03951	7.77154	7.90409	7.7369	7.99947	8.97902	6.89849	7.76909	8.48653	7.07381	8.36776	7.68458	7.9566	8.27851	7.81274	8.08681	8.15967	8.56641	8.00621	7.87051	6.61396	8.44906
GL50803_137715	7.09259	7.30691	7.71725	7.80539	8.0359	8.17615	8.16221	8.19941	8.15736	8.25316	6.97259	7.05797	6.7443	7.10291	7.22717	7.28077	7.27397	7.45998	7.75314	7.56509	7.82458	7.83573	8.05942	7.10549	7.12213	7.39799	7.71145	7.71594	7.85705	8.05863	8.12863	8.19106	8.31851	8.55013	7.04671
GL50803_137714	5.52474	5.07147	5.17007	5.32593	5.40399	5.62089	5.64756	5.62062	5.615	5.41526	6.4779	5.10602	4.47783	4.47586	4.44942	4.34696	4.33169	4.62955	4.51147	4.21205	5.0875	4.84832	7.5413	4.67022	4.78139	5.07652	4.65411	4.75916	4.76575	4.71902	5.05751	5.05352	5.07702	8.43669	5.00579
GL50803_11470	5.87006	5.48176	5.51603	5.62997	5.78298	5.90908	5.98457	6.05187	5.82181	5.7223	6.85399	5.49916	4.70153	4.74553	4.56205	4.38034	4.44684	4.56766	4.5869	4.19722	5.01779	4.80234	7.53632	4.83553	5.14809	5.43687	5.055	5.05856	5.08249	5.12823	5.50912	5.50779	5.60273	8.82084	5.51378
GL50803_15419	5.95712	6.02617	5.93845	6.30646	6.64779	6.94032	7.39657	7.63379	7.56112	7.60549	5.74947	6.19144	6.20015	6.17087	6.13656	6.45937	6.49477	6.56292	6.63407	6.77848	7.1931	7.1326	6.53212	6.34167	6.27019	6.37614	6.49202	6.84733	6.99473	7.35253	7.29594	7.39489	7.81212	7.1053	6.45578
GL50803_11449	5.71162	5.61564	5.58257	5.71246	6.13352	6.3012	6.62367	6.92636	6.84317	6.94792	4.99187	5.74639	5.92103	5.7783	5.74899	5.8564	6.01254	6.05484	6.18547	6.22255	6.63502	6.74068	5.65465	6.05981	5.7518	5.59352	5.73055	6.0856	6.07926	6.5944	6.41094	6.58135	7.06248	5.89523	5.90011
GL50803_11448	7.96421	8.18525	8.35414	8.55674	9.34703	9.44432	9.90814	9.86476	9.80807	9.52511	7.79071	8.27159	7.93462	8.24823	8.38707	8.46122	8.48893	8.5623	8.70915	8.74962	9.02297	8.93057	8.10527	7.8513	7.85295	8.25843	8.2761	8.50372	8.60638	9.10724	8.99431	8.82825	9.29555	8.32041	7.97872
GL50803_11446	6.91505	6.95128	7.09646	7.13716	7.51342	7.63875	7.89863	7.8645	7.82291	7.66002	9.44163	6.9245	6.91686	7.13702	7.20306	7.26298	7.27889	7.25599	7.40274	7.40049	7.49583	7.41013	9.01751	6.93886	7.17942	7.37704	7.32995	7.4708	7.65451	7.57393	7.82518	7.77808	7.69848	8.74044	7.19389
GL50803_15418	5.00238	5.15839	5.57583	5.68718	5.84096	6.09795	6.15549	6.27624	6.17787	6.30348	9.14971	5.17185	5.44708	5.40411	5.64907	5.77088	5.943	5.82096	6.06113	6.13384	6.40588	6.35871	7.78112	5.50797	5.82482	6.05534	6.0981	6.32162	6.28528	6.46532	6.08118	6.23578	6.78189	7.74927	5.52852
GL50803_11443	0.855341	0.598895	1.27061	2.03932	2.71077	3.16501	3.44033	3.89381	3.32628	3.84325	6.8785	0.637855	1.11712	0.888236	1.55685	1.80159	1.94335	2.47208	2.88628	2.74181	3.32888	3.63636	6.3823	1.02553	1.73786	1.28249	2.35576	3.01456	3.12974	3.64481	3.39725	3.7372	4.14758	6.39454	1.41267
GL50803_11442	6.3368	6.44594	6.44456	6.79072	6.93103	7.21505	7.3555	7.51821	7.41814	7.4574	9.22062	6.46484	6.68071	6.50304	6.74146	6.79635	6.91782	6.91088	7.0696	7.0578	7.3066	7.32947	8.19851	6.46984	6.78364	6.67688	7.06003	7.20023	7.46467	7.45996	7.4773	7.57226	7.73759	8.76172	6.71022
GL50803_112729	6.71176	6.79509	6.84022	6.77241	6.50901	6.43152	6.36602	6.37426	6.38431	6.49173	9.58517	6.87755	6.91686	6.91665	7.06625	6.81356	6.88649	6.57196	6.58139	6.52305	6.43826	6.56878	9.07367	6.778	6.9386	7.03156	6.94972	6.84074	6.73453	6.57158	6.55734	6.52593	6.7153	8.65782	6.87913
GL50803_11438	3.51307	3.67821	4.16825	4.04397	3.9716	3.87184	3.5969	3.69009	3.61561	3.80711	5.67841	4.07083	3.92608	4.03054	4.23706	4.1128	4.13966	4.01264	4.07022	4.07277	4.05525	4.08801	5.12709	4.10854	3.99754	4.28238	4.35205	4.14022	3.96124	4.05686	3.49541	3.56939	4.35775	4.78349	4.05368
GL50803_11436	7.55058	7.39371	7.35656	7.17281	7.04431	6.98722	7.11924	7.27724	7.52706	7.71134	6.81697	7.64312	7.83995	7.51322	7.35103	7.52384	7.59135	7.65115	7.5415	7.73897	7.45025	7.6324	6.17459	8.03148	7.58226	7.35395	7.14733	7.08561	7.19299	7.13778	7.16782	7.25123	7.08005	5.9504	7.54432
GL50803_11434	6.95261	7.08562	7.13443	7.11269	7.17376	7.19166	7.51122	7.76871	7.92819	8.07653	7.91027	7.09018	7.12686	7.09859	7.04149	7.1077	7.17635	7.21091	7.25078	7.31551	7.34173	7.38787	7.79036	7.03604	7.16008	6.98694	6.84526	6.93224	6.96618	6.98657	7.03845	7.00855	6.9172	6.89519	6.93148
GL50803_15416	6.30396	6.8162	6.32366	6.38506	6.72867	6.78668	6.91363	7.04497	7.09847	7.27592	8.14361	6.29894	6.53913	6.8743	6.52192	6.92578	7.09645	7.24332	7.2455	7.43329	7.49112	7.57846	7.97641	7.07325	7.6206	6.71647	6.90933	7.11212	7.25965	7.40275	7.34901	7.69677	7.6213	7.96789	6.91475
GL50803_33433	4.38222	4.37954	4.46438	4.55689	4.4608	4.31941	4.37232	4.33687	4.41691	4.66203	2.46818	4.42795	4.48735	4.53781	4.39832	4.51869	4.39947	4.33625	4.36332	4.37902	4.62319	4.65185	3.35909	4.25805	4.32369	4.31276	4.47117	4.57129	4.53704	4.69107	4.57267	5.30515	5.09598	3.82016	4.16418
GL50803_92729	6.55574	6.73292	7.67266	8.59076	9.00315	9.35119	9.44144	9.42847	9.47888	9.20369	7.67196	6.60903	6.69242	6.69916	7.53379	7.82628	7.92689	8.02025	8.41951	8.53017	8.65394	8.53551	10.3181	6.53966	6.85751	7.20199	8.01547	8.32637	8.52949	8.69558	8.86241	8.90344	8.9688	11.65	6.55137
GL50803_33434	5.41561	5.5266	5.7153	5.69058	6.04243	6.25137	6.28546	6.32465	6.29638	6.23116	6.16092	5.42272	5.41584	5.64834	5.60167	5.51091	5.64598	5.64234	5.97568	6.03202	6.17983	6.09492	5.51154	5.5049	5.89199	5.70935	5.84915	5.791	5.99155	6.14119	6.04212	6.12555	6.14529	5.56719	5.49071
GL50803_15936	5.31	5.39735	5.44628	5.3879	5.3832	5.30309	5.20314	5.09042	5.18283	5.23825	4.27869	5.46399	5.53692	5.51365	5.49869	5.4988	5.51043	5.29302	5.39254	5.45237	5.30602	5.23991	4.32427	5.5049	5.56746	5.44031	5.5671	5.45532	5.41211	5.34919	5.21528	5.17336	5.19117	4.5795	5.57958
GL50803_13428	5.70378	5.71972	5.72346	5.7373	5.63896	5.56321	5.39454	5.31985	5.38693	5.35395	4.51456	5.81579	5.93269	6.00184	5.82061	5.9594	5.90852	5.94437	5.93295	5.8685	5.66645	5.66256	4.8403	6.05143	6.0827	5.99574	5.95514	5.82345	5.78956	5.61433	5.73691	5.61482	5.44894	5.07441	6.03757
GL50803_3713	5.97549	5.85247	5.74766	5.71912	5.84235	5.8455	5.85285	5.76936	5.82304	5.85988	6.65614	5.84732	5.97616	5.84688	5.80107	5.90997	5.87103	6.18911	6.04541	6.30871	6.0887	6.16499	6.42178	6.2095	6.10411	5.69213	5.75146	5.74797	5.87118	5.86006	6.08118	6.23678	5.8249	5.69909	5.96162
GL50803_13427	3.46931	3.62641	3.60521	3.64251	3.54449	3.36366	3.59095	3.70187	3.79239	3.96307	3.69437	3.71966	3.89304	4.08834	4.00171	4.03108	4.1682	4.30046	3.9032	3.90952	4.03657	3.89017	3.26575	4.0882	4.16981	4.15825	4.17342	3.99106	3.76616	3.98751	3.59288	3.59459	3.95787	3.62166	4.09387
GL50803_92739	7.84799	7.79221	7.68681	7.56941	7.29911	7.15075	7.00031	6.73182	6.76697	6.66518	6.69507	7.91337	8.33009	8.29004	8.1722	7.99337	7.89442	7.72523	7.53458	7.53408	7.33219	7.32039	6.55005	7.84161	8.17361	8.13079	7.80146	7.63025	7.46742	7.29123	7.2719	7.08612	7.17577	6.70883	8.11655
GL50803_92741	7.32773	7.294	7.13825	7.05458	6.76565	6.72874	6.57855	6.34264	6.31229	6.14057	6.98147	7.42577	7.31994	7.30208	7.17246	7.182	7.20548	7.2056	7.1356	7.14827	6.97132	7.18202	6.923	7.3739	7.10908	6.9572	6.79039	6.73667	6.66382	6.55968	6.76471	6.78185	6.40138	6.52035	7.18165
GL50803_23235	7.2731	7.22765	7.21185	7.23866	7.10039	7.10713	7.12491	7.18321	7.13868	7.20304	8.27305	7.30794	7.41695	7.33229	7.5731	7.10571	7.0707	6.74304	6.85058	6.71744	6.85353	6.74855	7.29072	6.96196	7.40104	7.42649	7.24694	7.09284	6.89166	6.94898	6.92247	6.77911	6.99054	7.02153	7.33279
GL50803_112718	6.23704	6.31503	6.25638	6.23617	5.99713	5.92078	5.74048	5.82563	5.76385	5.90226	6.21046	6.3281	6.50751	6.40059	6.50108	6.17163	6.03305	5.88035	5.85048	5.90203	5.90782	5.98299	5.77132	5.92639	6.1655	6.37883	5.95994	5.8708	5.70305	5.81956	5.55821	5.78868	5.88186	5.52356	6.10079
GL50803_19364	3.6695	3.45883	3.56038	3.49495	3.51004	3.645	3.63208	3.52088	3.44008	3.35396	7.28235	3.45208	3.70999	3.51859	3.58065	3.72293	3.76297	4.03023	4.00672	4.27342	3.99847	4.20904	6.70565	3.87679	3.65493	3.49599	3.23416	3.33278	3.79641	3.88357	3.78466	3.84614	3.6623	5.99671	3.53821
GL50803_3847	4.00704	3.95513	3.85585	3.83892	4.45357	4.54785	4.65482	4.83095	4.47146	4.63908	2.85941	3.67934	3.76842	3.95128	4.02436	3.86177	4.17173	4.44844	4.72688	4.48964	4.72002	4.97075	3.9809	4.16789	4.11865	4.02242	4.34105	4.17417	4.3894	4.85807	4.59775	4.98131	5.08759	4.26823	4.05738
GL50803_16472	6.26717	6.20235	6.07382	6.13262	6.38711	6.41555	6.33434	6.48748	6.34961	6.3862	5.89239	6.18322	5.24677	5.66012	5.50031	5.65154	5.66614	6.06127	6.55602	5.69729	6.12452	6.58084	6.56384	5.97262	5.70455	5.87499	6.21617	5.97799	6.12765	6.28242	6.65083	6.73799	6.53941	6.97371	6.15187
GL50803_16471	6.81152	7.01309	6.89993	6.85417	6.67448	6.55015	6.46364	6.32275	6.4449	6.34662	6.597	7.12972	7.12686	7.16673	7.24464	7.27368	7.2678	7.0326	6.97449	6.7995	6.77189	6.61175	6.98289	7.31647	7.54362	7.38107	7.46314	7.31309	7.08225	6.82058	6.8137	6.59077	6.64192	7.62503	7.52608
GL50803_13464	4.97134	5.25109	5.05841	5.03943	5.22863	5.08308	5.21479	5.08143	5.18667	5.20565	5.04933	5.08853	5.19154	5.3776	5.41548	5.56853	5.55164	5.38133	5.32004	5.43351	5.39487	5.41726	5.38409	5.59271	5.70054	5.57797	5.65114	5.60283	5.44431	5.53935	5.18066	5.22269	5.59831	6.49799	5.66208
GL50803_137713	6.17028	5.85528	5.49474	5.41689	5.51934	5.48377	5.44487	5.52936	5.50701	5.67295	6.71177	5.63637	4.98079	4.94884	4.85518	4.88248	4.75979	4.83366	4.82927	4.8558	5.3407	5.5784	7.11721	4.89763	4.63784	4.31276	4.55288	4.62444	4.51901	4.73155	4.85745	5.15442	5.38869	7.49635	4.83955
GL50803_23808	5.3017	4.54213	4.38432	4.51536	4.74776	5.03323	5.10848	5.18157	5.25045	5.42424	6.65984	5.17185	2.88398	3.28757	3.41228	3.60362	3.33596	4.06904	5.24157	3.14868	4.83529	6.02481	6.61583	4.05084	3.06208	3.32027	4.0839	3.6786	4.11718	4.9163	5.52082	5.87221	5.91547	6.02827	4.38636
GL50803_33660	7.90214	7.94507	7.90872	7.89643	7.49987	7.35048	7.21176	7.1094	7.22666	7.10922	5.8194	8.15515	8.23369	8.20391	8.21245	8.29656	8.21825	8.03502	7.7709	7.63519	7.4498	7.37961	6.1329	8.30349	8.26941	8.41996	8.2511	8.25678	7.96114	7.59156	7.62014	7.18899	7.2604	6.38238	8.4965
GL50803_16468	9.63815	9.71163	9.83591	9.95768	9.95811	9.98893	9.85647	9.70375	9.71771	9.42526	10.8534	9.66927	9.43651	9.32803	9.38061	9.43979	9.51873	9.59211	9.65831	9.53624	9.39187	9.27829	12.4109	9.43744	9.33885	9.25367	9.36792	9.57027	9.70551	9.49999	9.67725	9.47161	8.95444	12.8655	9.24505
GL50803_3287	6.11218	5.47262	5.72752	5.73072	6.16486	6.16777	6.35203	6.34452	6.40671	6.30348	4.62953	6.1562	6.0519	5.57247	5.87395	6.04828	6.21421	6.56065	6.44797	6.56696	6.70323	6.9039	5.71593	6.42107	5.50448	5.80727	5.95994	6.11648	6.18213	6.4743	6.56583	6.59546	6.48848	5.15423	6.23834
GL50803_137712	9.33747	9.56714	9.68156	9.59657	9.35627	9.25272	8.97224	8.76661	8.66129	8.62941	8.03971	9.40009	8.79974	9.02307	9.22972	8.32791	8.29912	7.70997	7.95396	7.94467	8.12623	7.9211	7.98596	8.13103	8.64251	8.85465	8.65243	8.52587	8.0776	8.21782	7.98526	7.66812	8.26062	8.42658	8.29383
GL50803_7203	5.75479	5.71042	5.65473	5.70576	5.59361	5.57894	5.35824	5.3141	5.41994	5.22118	8.33096	5.92327	6.01288	5.75652	5.7945	5.83248	5.73573	5.83978	5.69179	5.66935	5.49746	5.26405	7.91164	5.63679	5.62359	5.53353	5.55922	5.56654	5.66393	5.47076	5.72936	5.55188	5.18725	6.68639	5.86465
GL50803_7204	8.76505	8.7009	8.5804	8.47393	8.04555	7.8215	7.63162	7.57255	7.55296	7.54231	7.3967	8.95196	8.82781	8.84267	8.77337	8.948	8.7843	8.84869	8.82839	8.62636	8.27234	8.21182	7.05998	9.09043	8.84008	8.73936	8.46884	8.48946	8.5614	8.17328	8.25728	7.73835	7.61255	6.4405	8.96544
GL50803_14391	7.69095	7.92343	7.76595	7.63565	7.64902	7.51344	7.71191	7.73864	7.79393	7.79648	6.98049	7.77469	7.71383	7.96432	7.89064	7.66395	7.54822	7.37262	7.19762	7.20172	7.36157	7.14511	6.9637	7.51924	7.96358	8.0435	7.80946	7.63521	7.43092	7.44749	7.33665	7.17287	7.50904	7.20335	7.76684
GL50803_14392	7.54004	7.40096	7.46149	7.4245	7.53713	7.50455	7.65069	7.59167	7.81238	7.74755	7.23361	7.46654	7.57896	7.53497	7.47458	7.58346	7.61649	7.7045	7.73517	7.55786	7.75702	7.73819	7.07519	7.5994	7.44803	7.46714	7.40404	7.53426	7.47873	7.53121	7.51546	7.56391	7.46635	6.87177	7.43836
GL50803_7207	8.85015	8.7332	8.73844	8.77518	8.5247	8.49714	8.38328	8.33252	8.29873	8.30672	11.1011	8.84716	8.78823	8.56405	8.7569	8.1511	8.06232	7.75132	7.74044	7.77624	7.80781	7.58326	8.72838	7.94561	8.28578	8.38889	8.36521	8.22246	8.13396	7.99977	8.06735	7.80363	7.86928	8.51237	8.33747
GL50803_16747	5.57722	5.69007	5.86661	5.8494	5.93356	5.89169	5.86891	5.73251	5.65576	5.7223	7.95204	5.66614	5.72304	5.71619	5.94214	5.51091	5.70684	5.44501	5.43399	5.56638	5.62641	5.62731	7.64596	5.51408	5.61793	5.8086	5.80847	5.87596	5.41536	5.71618	5.36886	5.22067	5.66192	7.38584	5.58984
GL50803_16746	4.66684	5.04459	5.27924	5.00711	5.05549	5.03069	4.83671	4.70492	4.60949	4.71907	4.9361	5.0233	5.04452	5.00302	5.11988	5.13021	5.21451	5.06671	5.03181	5.03326	5.08977	4.95105	4.16794	5.13029	5.3077	5.27082	5.3392	5.3102	4.92711	5.08201	4.58108	4.40822	5.13929	4.58557	5.03798
GL50803_14807	6.59868	6.5045	6.54579	6.48231	6.26846	6.24919	5.87014	5.58766	5.70346	5.47407	6.075	6.68445	6.8848	6.71194	6.68998	6.88914	6.79736	6.84408	6.76532	6.74255	6.46208	6.51697	5.92271	6.99018	7.01322	6.79387	6.7714	6.66162	6.6201	6.38591	6.60002	6.65432	6.22115	5.94568	6.9335
GL50803_8913	5.65252	5.76084	5.41388	5.61396	5.50366	5.48841	5.44157	5.38887	5.58621	5.4479	7.05625	5.72675	5.91985	5.74136	5.77993	5.92475	6.11415	6.21913	6.04541	6.24525	6.08644	6.07799	6.60253	6.17616	6.00465	5.69645	5.59206	5.58559	5.73724	5.58425	5.68194	5.79685	5.43411	6.41173	5.80978
GL50803_8914	5.16437	5.33013	5.28477	5.2543	5.41147	5.33636	5.49986	5.60502	5.77919	5.99955	5.58307	5.36397	5.26718	5.34697	5.3578	5.54957	5.68971	5.60908	5.52048	5.6034	5.5262	5.45447	4.97615	5.62414	5.70588	5.57171	5.60744	5.48774	5.48047	5.56897	5.46588	5.47424	5.57896	5.40836	5.5431
GL50803_28666	4.49926	4.76809	4.78593	4.62591	4.62756	4.36849	4.11488	4.0215	4.18694	4.1622	3.16686	4.84992	5.15815	5.28366	5.08584	5.22881	5.25167	5.08155	4.91957	4.72493	4.40389	4.46657	3.22665	5.05053	5.31296	5.28621	5.09702	5.02639	4.69525	4.55107	4.16999	4.0648	4.33309	3.89053	5.2338
GL50803_8916	7.44251	7.66119	7.57122	7.43364	7.26439	7.23586	7.1428	6.96719	7.17973	7.07019	6.13107	7.52336	7.54137	7.78468	7.61697	7.46242	7.41314	7.1871	7.09449	7.1171	6.95276	6.93055	6.3531	7.19619	7.53614	7.62865	7.25867	7.16162	7.08225	6.87241	6.90472	6.89332	6.7543	6.22397	7.33393
GL50803_8917	9.29305	9.27959	9.19414	9.09356	8.88998	8.71123	8.59902	8.52963	8.56976	8.49511	8.19331	9.45144	9.18818	9.22871	9.14649	8.96845	8.75034	8.60547	8.68361	8.18768	8.22904	8.21956	7.59698	8.81909	8.94941	9.08849	8.82138	8.67188	8.40597	8.22204	8.3258	8.176	8.03597	7.01367	9.07193
GL50803_16745	11.1675	10.9313	10.8631	10.9532	10.5625	10.3633	10.1698	9.92261	9.82673	9.72344	8.53446	11.3913	10.6539	10.549	10.5407	10.2364	9.90671	9.56068	9.50068	8.96544	9.08109	8.83976	9.21083	9.99408	10.0495	10.4086	10.2066	9.99236	9.60182	9.33911	9.46318	8.99516	9.09803	9.13613	10.4734
GL50803_8920	5.42518	5.53013	5.39613	5.38371	5.34657	5.35272	5.3477	5.11925	5.23198	5.06925	5.8238	5.49419	5.12601	5.34514	5.37023	5.12037	4.96285	5.05601	5.08481	4.82719	4.99136	5.09487	5.29713	4.92082	5.19444	5.38421	5.26742	5.13381	5.29163	5.22355	5.44454	5.30325	5.17144	5.33093	5.11278
GL50803_8921	5.83457	6.10753	6.15899	6.19969	6.14367	6.13447	6.10318	6.05072	6.10768	6.08882	5.26516	5.96699	5.88546	6.10884	6.18661	6.09226	6.11506	6.04838	5.86571	6.03202	6.11676	6.01298	5.30184	5.81693	6.1742	6.3071	6.31691	6.31973	6.23462	6.30774	6.18688	6.07048	6.2553	6.09366	5.91446
GL50803_8922	3.83955	4.20513	4.6513	4.65053	4.85597	4.84954	4.99371	4.86539	4.94501	4.90582	3.76924	4.34569	4.1464	4.08834	4.41555	4.50362	4.7024	4.62955	4.67753	4.90909	4.98162	4.88252	3.59227	4.35998	4.47529	4.54157	4.87099	5.01941	4.85947	5.13767	4.69393	4.76804	5.04701	4.19066	4.34155
GL50803_33663	7.05423	7.31665	7.11518	7.04731	6.97085	6.8413	6.80992	6.60034	6.7273	6.63328	5.75178	7.21681	7.41986	7.48577	7.46923	7.36323	7.39514	7.13369	6.8924	6.83406	6.77823	6.68065	5.84739	7.14541	7.68829	7.64329	7.46526	7.43405	6.95337	6.8311	6.63947	6.38588	6.55853	6.46871	7.50083
GL50803_13479	6.23921	6.19125	6.07542	6.05043	5.89001	5.8141	5.6375	5.51107	5.58476	5.53749	6.19357	6.27014	6.36587	6.36325	6.28179	6.31319	6.37207	6.19008	6.09205	6.10334	5.87796	5.68061	5.88867	6.23285	6.39119	6.19946	6.27611	6.21762	6.08642	5.81838	5.9281	5.83832	5.65767	5.90982	6.39275
GL50803_13478	6.76326	6.77367	6.58325	6.56974	6.57965	6.55767	6.5543	6.31414	6.41983	6.34347	8.21982	6.95317	6.96194	6.61996	6.54089	6.91329	7.00595	7.18612	7.15657	7.35529	7.16919	7.2701	7.90856	7.30109	6.91572	6.52057	6.64593	6.69269	6.93706	6.96126	6.9718	6.91848	6.70847	6.92783	6.81556
GL50803_3883	3.19262	3.14583	3.01314	3.11498	3.21725	3.26775	3.3304	3.14295	3.1798	3.22976	4.5415	3.39631	3.48769	3.23342	3.18994	3.2095	3.54085	3.38524	3.80897	3.49629	3.57527	3.55388	4.24822	3.52992	3.51585	3.16244	3.1858	3.36988	3.44188	3.57423	3.18565	3.53074	3.3685	4.05715	3.17931
GL50803_60275	2.10787	2.15351	1.78884	1.70513	2.13719	1.97529	1.99503	2.06265	1.635	1.85219	0.726892	1.94043	1.56362	1.82648	1.55685	1.78174	1.61046	1.79474	1.93815	1.306	1.23222	1.67202	1.61395	1.93463	1.69552	1.87761	1.77084	1.55474	1.57857	1.606	1.52889	1.71984	1.9545	1.90114	1.45817
GL50803_112696	4.71135	5.14003	6.03502	6.57984	7.11651	7.43594	7.54314	7.63032	7.48984	7.37917	5.34381	4.50247	3.88345	4.55368	5.14696	5.36512	5.43755	5.77606	6.62271	6.01943	6.63657	6.71755	6.54608	4.11257	4.72462	5.26695	5.99194	6.17843	6.64317	7.16482	7.2217	6.94506	7.28357	6.23753	4.50491
GL50803_112695	2.84997	2.81661	2.68585	2.56847	3.11092	2.93999	2.83231	2.51395	2.04361	2.23886	2.37537	2.69676	0.613377	1.96585	2.12476	1.49524	1.20479	1.4988	2.16989	0.311225	1.26468	1.7652	3.03629	1.71875	1.43742	2.13724	2.20215	1.47527	1.37981	1.91806	2.17263	1.67328	2.31259	3.33485	2.06951
GL50803_112693	3.39329	3.48087	2.84387	3.22211	3.15618	3.24603	3.02988	2.84663	2.81313	2.89297	3.44321	2.95014	2.14771	2.84705	2.68693	2.89531	2.21364	2.5473	3.00103	2.02976	2.65666	3.16676	4.61662	2.68504	2.75703	2.82585	3.1858	2.54211	2.88896	2.97601	3.58732	3.56939	3.46244	4.08315	3.15189
GL50803_30448	5.70063	5.62227	5.53933	5.48105	5.30497	5.20405	5.15154	4.92691	4.97864	4.79716	4.50911	5.85381	5.73906	5.58643	5.53226	5.74292	5.78264	5.74444	5.39827	5.4617	5.30797	5.21328	6.17201	5.93439	5.85519	5.66736	5.72068	5.65936	5.6096	5.23943	5.32281	5.20439	5.23936	6.96208	5.87097
GL50803_9283	7.02367	7.18632	7.2075	7.19629	7.09807	7.01253	6.99975	6.96475	7.01613	7.07162	7.43241	7.07971	7.06409	7.09696	7.37017	7.07749	7.15512	6.91207	6.81964	6.93526	7.00954	7.01894	7.10783	7.01464	7.15862	7.33048	7.25282	7.24484	6.95673	7.04947	6.78305	6.58056	7.03926	7.60947	7.13995
GL50803_14921	8.19973	8.19833	8.02673	8.07885	7.67336	7.58526	7.3712	7.12151	7.0571	6.95362	10.4345	8.46315	8.43959	8.20114	8.24968	8.27564	8.11573	7.91471	7.75946	7.53224	7.28103	7.0927	8.50306	8.17461	8.38382	8.37096	8.27297	8.08784	7.9248	7.40275	7.66566	7.33493	6.9667	7.76742	8.39745
GL50803_9287	6.63132	6.91666	7.00321	6.93656	6.76053	6.67773	6.57403	6.30065	6.24112	5.87414	6.05082	6.84602	6.81657	6.89376	7.01516	7.02463	6.97043	7.02329	6.91186	7.04647	6.73761	6.5712	5.56346	7.05503	7.44922	7.44031	7.50973	7.43755	7.30244	7.01504	7.10653	6.69203	6.57214	5.45223	7.02467
GL50803_9289	7.31954	7.3334	7.32742	7.32531	7.11765	7.04182	6.98452	6.84901	6.92881	6.93751	6.56978	7.38472	7.5823	7.48907	7.47787	7.64416	7.72344	7.76681	7.651	7.68652	7.27208	7.241	5.81481	7.84009	7.72065	7.59467	7.62416	7.58522	7.77998	7.35941	7.37584	7.10926	6.87938	5.83021	7.71595
GL50803_14922	5.65089	5.57352	5.53701	5.38371	5.28881	5.22085	4.87637	4.66636	4.7563	4.74795	5.05682	5.59207	5.7536	5.75652	5.72292	5.59294	5.57714	5.57652	5.48865	5.48173	5.25441	5.20499	4.8912	5.73164	5.84434	5.69213	5.54331	5.41507	5.58958	5.20031	5.4988	5.43291	5.00526	5.11277	5.80428
GL50803_17229	6.69365	6.73369	6.84491	6.73343	6.68146	6.64408	6.53584	6.49511	6.5545	6.54757	7.72699	6.70539	6.82786	6.96314	7.12663	6.84019	6.82171	6.69491	6.58474	6.73872	6.69655	6.66108	6.83638	6.82116	7.08519	7.0754	7.04486	6.99176	6.89632	6.83864	6.68764	6.56948	6.86102	6.81733	6.99024
GL50803_9293	6.11928	6.19792	6.25357	6.17202	6.20418	6.29961	6.48303	6.47895	6.60776	6.74377	8.22232	6.11252	6.40658	6.39002	6.40512	6.33378	6.34342	6.32891	6.24701	6.41426	6.49324	6.60152	7.42739	6.34767	6.32763	6.3851	6.37827	6.37369	6.30995	6.55405	6.20875	6.38769	6.62242	6.97486	6.29898
GL50803_9294	3.58317	3.63299	3.87794	3.62132	3.60451	3.45737	3.4337	3.67822	3.78734	3.82981	3.93286	3.47917	3.82958	3.83661	3.79072	3.76903	3.72984	3.71386	3.58645	3.68879	3.8672	3.86408	3.62271	3.49943	3.85574	3.88262	3.78163	3.71365	3.34287	3.92779	3.44102	3.32025	3.80232	3.78891	3.64534
GL50803_9296	6.90482	6.98316	6.94161	6.81114	6.72342	6.6181	6.41313	6.2159	6.2946	6.14329	6.38426	7.11306	7.25128	7.09913	7.0376	7.198	7.12084	7.12655	7.04367	6.7847	6.54454	6.40469	6.33253	7.19571	7.13604	7.04406	7.01288	7.02411	6.88522	6.51255	6.53875	6.35488	6.20085	5.90982	7.21268
GL50803_114230	5.60276	5.90504	5.83872	5.77137	5.76264	5.66412	5.73914	5.77774	5.87396	5.85988	5.75409	5.70396	5.72572	5.94401	6.01744	5.82037	5.72976	5.65515	5.50111	5.53134	5.53288	5.53109	5.87925	5.55911	5.93925	6.09192	5.88114	5.791	5.69638	5.63848	5.50028	5.37773	5.72013	6.35597	5.83047
GL50803_137711	7.57616	7.92979	7.92075	7.87345	7.87295	7.75923	7.72079	7.55967	7.65803	7.62962	7.65108	7.71931	7.70298	7.92124	8.08467	7.82507	7.83697	7.56816	7.5873	7.55168	7.61157	7.56718	7.82513	7.62115	8.09943	8.19895	8.15572	8.1446	7.75131	7.8524	7.62116	7.34052	7.83174	8.29005	7.80997
GL50803_137710	5.60613	5.59557	5.35208	5.46329	5.37939	5.27655	5.04028	4.76791	4.74592	4.56526	5.60367	4.2348	4.84667	5.26258	5.15109	5.10847	5.03437	4.98338	4.97678	4.62599	4.67242	4.57672	5.72297	5.19068	5.55123	5.40902	5.32252	5.4008	5.16982	4.93158	5.26135	4.87476	4.95766	6.34885	3.95002
GL50803_41472	12.5497	12.2451	12.0994	12.2334	12.4005	12.4579	12.4772	12.4968	12.418	12.4169	13.5497	10.6059	11.3094	11.3408	11.1879	11.0617	11.0681	11.0397	11.115	10.9566	11.1457	11.2235	13.6816	12.0567	11.964	11.8715	11.6999	11.7224	11.7694	11.7697	11.8737	12.0611	11.8084	14.6336	9.39238
GL50803_10659	5.10841	5.04212	5.07125	4.91141	5.15473	5.03449	5.15759	5.18367	5.23384	5.29318	6.33582	4.87309	4.57925	4.73999	4.74769	4.60877	4.62472	4.74589	4.74495	4.62599	4.90646	4.98293	5.7508	4.67296	4.62662	4.83108	4.90375	4.78959	4.79351	4.92941	4.96844	5.0444	5.21064	5.90011	4.77586
GL50803_10661	8.0549	8.21322	8.38275	8.39157	8.46996	8.51314	8.51062	8.42714	8.52836	8.36848	8.42368	8.06665	8.22636	8.35963	8.48604	7.84643	7.82273	7.55265	7.65896	7.73641	7.83543	7.74177	7.55912	7.26621	7.90382	8.19539	7.82106	7.68831	7.69823	7.82109	7.81452	7.90847	7.97295	8.07268	7.55221
GL50803_24425	7.36353	7.45114	7.69772	7.79123	7.8289	7.89382	7.79509	7.69437	7.72494	7.48555	6.43256	7.40385	7.39605	7.46116	7.48931	7.51447	7.60185	7.45347	7.74942	7.50126	7.46822	7.44003	6.4261	7.11104	7.39486	7.54596	7.5936	7.61063	7.65623	7.42645	7.50408	7.51896	7.20373	6.4555	7.31436
GL50803_15260	9.99391	10.0008	10.0108	9.83167	9.48801	9.28036	9.01964	8.67938	8.68219	8.51537	7.8571	9.9242	9.55574	10.0684	9.98616	9.67488	9.34679	9.40212	9.38284	8.53423	8.84302	8.93465	8.69833	9.28012	9.55916	10.0055	9.6318	9.23822	8.97413	8.82017	9.19607	9.14742	8.80988	7.91701	9.67701
GL50803_10666	6.16571	6.18119	6.35288	6.39134	6.49675	6.53992	6.39276	6.44518	6.45688	6.51292	5.11538	6.14672	6.2373	6.21644	6.27614	6.35912	6.3442	6.53007	6.65254	6.4854	6.55525	6.52031	5.60978	6.29451	6.21599	6.39755	6.46357	6.49449	6.54413	6.57992	6.517	6.69349	6.47406	6.25097	6.23916
GL50803_10667	4.04728	4.06136	4.51225	4.86708	5.18344	5.43373	5.39625	5.28503	5.56718	5.51246	4.8088	3.87564	4.18981	4.01687	4.30152	4.56878	4.91943	5.22018	5.46158	5.68538	5.55766	5.60543	5.47864	4.46468	4.2561	4.43515	4.88872	5.04027	5.4459	5.54077	5.5653	5.9426	5.54256	6.48829	4.34458
GL50803_16996	7.8487	7.76328	7.62392	7.67647	7.27981	7.27955	7.19666	7.25343	7.25118	7.36486	11.0419	7.98039	7.8353	7.6945	7.72184	7.6115	7.51145	7.33065	7.27327	6.90592	6.78384	6.65272	9.40692	7.5508	7.5877	7.5662	7.58546	7.45319	7.29274	6.86333	7.06916	6.74856	6.67102	8.72608	7.74807
GL50803_60288	3.56942	3.55894	3.68257	3.33056	3.30829	3.2591	3.25718	3.24309	3.17207	3.03256	5.62902	3.64387	3.6991	3.48588	3.70921	3.70196	3.72984	3.75146	3.81469	3.6728	3.58815	3.42416	5.4192	3.76334	3.75625	3.54798	3.41985	3.54226	3.59314	3.4463	3.42865	3.57573	3.46244	4.74602	3.89319
GL50803_24423	6.61216	6.63802	6.69533	6.7692	6.56965	6.60195	6.42069	6.26933	6.27308	6.13511	6.95064	6.71966	6.49025	6.46327	6.62257	6.3482	6.34888	6.19399	6.14633	6.07117	6.16808	5.92611	6.30699	6.26492	6.51657	6.53191	6.5843	6.35068	6.21142	6.158	6.09004	6.07496	6.01294	6.32181	6.48493
GL50803_6242	9.02737	9.31888	8.91977	8.77738	7.93302	7.70831	7.42651	6.95985	7.03436	6.73538	7.32717	9.26868	9.14898	9.30477	9.03952	9.36317	9.12357	9.09904	8.95398	8.76479	8.11542	8.06892	7.7182	9.22972	9.31806	9.05533	8.69498	8.60053	8.55183	7.97364	8.11735	7.8033	7.25479	6.66361	9.05155
GL50803_6245	5.84317	5.90911	5.89938	5.79207	5.82703	5.79404	5.85657	5.86806	5.77282	5.94965	3.87472	5.91709	5.83167	5.91112	5.92539	5.74035	5.65861	5.49337	5.32205	5.2043	5.26649	5.10158	4.40529	5.5782	5.8743	5.93846	5.59823	5.42038	5.16789	5.30796	5.04743	4.86443	5.44237	4.90018	5.70871
GL50803_16993	8.66798	8.88764	8.62708	8.45334	7.89013	7.62829	7.46482	7.27773	7.21637	7.30497	6.01858	8.82076	8.53964	8.91602	8.78751	7.99714	7.50866	7.16438	6.90518	6.65573	6.6846	6.47016	6.3644	7.31647	8.39689	8.59622	7.82632	7.36821	6.94158	6.64891	6.77452	6.60634	6.6961	6.57633	7.90697
GL50803_114242	7.061	7.33995	7.4188	7.3941	7.37094	7.28062	7.30961	7.15778	7.15151	7.26264	6.38277	7.16925	7.17724	7.36054	7.53023	6.98666	6.87409	6.62646	6.59971	6.6503	6.81911	6.69478	6.35989	6.61126	7.19897	7.49514	7.21867	7.13007	6.8484	6.8982	6.78366	6.56391	7.17775	6.98409	6.94702
GL50803_16992	6.63627	6.75268	6.82419	6.69675	6.59206	6.61726	6.53816	6.43463	6.46797	6.42548	6.27289	6.54316	6.51295	6.71829	6.84432	6.32009	6.31258	5.97762	5.95383	5.96794	6.16593	6.03771	6.55991	5.99464	6.51429	6.77149	6.60207	6.41775	6.30995	6.26873	6.32761	6.25072	6.34171	6.7268	6.2935
GL50803_5359	8.84178	8.94543	8.82107	8.61196	8.04405	7.72744	7.38416	6.99618	6.91614	6.79715	5.72852	8.98276	8.8849	9.00961	8.95128	8.35188	7.9435	7.50195	7.30813	6.91047	6.78594	6.51529	6.69315	7.96415	8.57568	8.67542	8.20281	7.81172	7.44968	6.95807	6.86968	6.20645	6.25811	7.14183	8.32831
GL50803_5358	5.89508	5.97272	6.06743	6.08568	6.22557	6.20709	6.45466	6.57654	6.724	6.81147	6.7619	5.92697	6.09198	6.0384	6.02645	6.05346	6.11415	6.19302	6.15762	6.32073	6.40223	6.38372	6.33023	6.00553	5.96398	5.91018	5.89374	5.9378	5.94054	6.15892	6.11921	6.26845	6.21345	6.05259	6.02535
GL50803_13904	7.27681	7.19357	7.25751	7.16061	7.0425	6.91128	6.91005	6.95432	7.03756	7.03107	6.92426	7.35166	7.29305	7.27983	7.26665	7.49289	7.45682	7.51879	7.48883	7.41578	7.24995	7.09551	6.59871	7.51162	7.32018	7.23953	7.16719	7.23029	7.40088	7.09478	7.21766	7.15498	6.91185	6.22397	7.31706
GL50803_13903	7.19073	7.09458	7.12137	7.04599	7.08409	6.98919	7.05426	6.94382	6.94534	6.94481	5.95986	7.24914	7.3226	7.23624	7.27753	6.9953	6.87787	6.71952	6.66288	6.66519	6.63657	6.53113	6.14867	6.76332	7.1015	7.20199	6.89311	6.808	6.61303	6.63164	6.65615	6.60789	6.63833	6.01932	7.09296
GL50803_33898	4.44004	4.55257	4.63409	4.6188	4.68119	4.66215	4.66618	4.44595	4.47146	4.54071	3.70395	4.68517	4.77074	4.61245	4.75854	4.75083	4.80367	4.83115	4.8955	4.98875	4.8025	4.83763	3.83256	4.8906	4.78392	4.90022	4.91368	4.92037	4.7985	4.98906	4.92507	4.95479	4.89406	4.21437	4.85876
GL50803_6709	7.38626	7.39323	7.32004	7.38783	7.09633	7.05812	6.86332	6.82093	6.85589	6.79888	8.87437	7.46907	7.56179	7.44933	7.54792	7.279	7.19901	6.873	6.85266	6.72133	6.61076	6.56716	7.27524	6.93488	7.34394	7.39178	7.14944	7.06483	6.78192	6.65287	6.79755	6.76183	6.51926	6.98294	7.28072
GL50803_114246	7.85615	7.84239	7.80971	7.77532	7.61903	7.51389	7.42985	7.34829	7.38592	7.30254	6.50554	7.88896	7.99204	7.92429	7.95129	7.74819	7.66016	7.50234	7.42018	7.32577	7.30513	7.21955	6.39558	7.57731	7.77408	7.85545	7.67396	7.51659	7.44611	7.31432	7.38267	7.53654	7.28861	5.95509	7.84142
GL50803_114247	5.74565	5.94524	5.82172	5.8615	6.03276	5.92215	5.9686	5.91436	6.00374	6.03514	4.72665	5.79167	5.78482	5.96553	5.92659	5.96381	5.98572	6.08776	6.09323	6.02574	6.16163	6.21849	5.08945	5.98367	6.1212	6.08424	6.24498	6.22877	6.18213	6.50015	6.18044	6.46146	6.59157	5.57637	6.01967
GL50803_6713	3.32127	3.56583	3.57848	3.59981	3.59139	3.67457	3.55475	3.57952	3.45926	3.62186	2.53406	3.33831	2.65534	3.42506	3.06445	3.371	3.40354	3.73547	3.9866	3.29513	3.75169	4.05148	2.79037	3.40392	3.25665	3.46252	3.66887	3.61822	3.6714	4.04084	4.00064	3.89261	4.32597	3.52383	3.4621
GL50803_24412	8.12091	9.18946	9.28203	9.23908	9.62783	9.64826	9.86597	10.1949	10.1761	10.2421	8.4895	8.25012	6.82034	8.13728	7.88385	7.7405	7.73661	7.71915	8.27641	7.75172	8.50585	8.59819	8.38706	7.07118	8.01721	8.15797	8.26887	8.1214	8.47305	8.98058	8.87401	8.90738	9.22957	7.97658	7.20018
GL50803_20081	6.84472	6.53467	6.70154	6.71103	7.01451	7.0603	7.26968	7.54257	7.68917	7.782	6.86042	6.69171	6.76858	6.65128	6.59938	6.87164	7.06359	7.32085	7.41266	7.50277	7.76661	7.91031	7.43919	7.24524	6.62207	6.52382	6.54809	6.73454	7.09549	7.32345	7.39186	7.83404	7.57173	6.39627	6.80899
GL50803_6724	7.78096	7.73298	7.74306	7.60853	7.31566	7.28222	7.19127	7.1248	7.08669	7.05149	9.60286	8.02071	7.90059	7.81528	7.68571	7.81655	7.88182	7.9633	7.91823	7.79821	7.63814	7.72411	8.6161	7.96916	7.69637	7.46376	7.33457	7.31595	7.4176	7.27292	7.28697	7.29176	6.97412	7.85551	7.60183
GL50803_6725	8.11086	8.07393	7.92606	7.8742	7.56928	7.44669	7.28312	7.12589	7.1965	7.18599	7.71283	8.20494	8.3511	8.19179	8.31313	8.16505	8.07909	7.93118	7.58479	7.48876	7.25804	7.12383	6.73381	8.15323	8.39255	8.25965	8.2976	7.98699	7.65623	7.31889	7.40534	7.2709	7.05011	6.70185	8.47782
GL50803_16130	6.01787	5.81391	5.94893	5.89574	5.82423	5.77217	5.66465	5.65586	5.73397	5.73077	5.03423	6.01291	6.0899	5.98906	6.01744	5.94385	5.9797	6.0602	5.94994	5.88479	5.82452	5.93742	5.31588	6.06294	5.97066	5.89896	5.77889	5.83145	5.76937	5.59663	5.66622	5.81706	5.62612	5.10433	6.07638
GL50803_12942	5.27442	5.08353	5.09031	5.04475	4.97442	4.98027	4.98919	5.20452	5.26142	5.49552	4.34749	5.26431	5.19542	5.12276	5.09014	5.12628	5.24163	5.33785	5.24581	5.2282	5.16049	5.32463	4.14716	5.44057	5.17915	4.89521	4.80848	4.8486	4.79101	4.8489	5.05952	4.9932	4.87954	3.89053	5.00003
GL50803_2226	4.53154	4.69454	4.55859	4.34912	4.43899	4.39043	4.5907	4.74816	4.76146	4.97261	3.39674	4.59826	4.84173	4.70347	4.65786	4.83028	4.80594	4.89013	4.8489	4.99733	4.81076	4.94609	3.57681	5.01649	4.84088	4.69646	4.4337	4.56491	4.46354	4.63882	4.49471	4.66771	4.58358	3.63343	4.78258
GL50803_12941	6.40226	6.31708	6.23942	6.37666	6.5663	6.74896	7.09054	7.50567	7.52819	7.7538	7.17716	6.27884	6.53913	6.45061	6.44343	6.64112	6.60784	6.75565	6.76458	6.86018	7.02857	7.13587	7.0916	6.51015	6.53845	6.52787	6.37468	6.63749	6.91827	6.98396	7.31287	7.42505	7.39327	6.84037	6.47804
GL50803_16129	6.80199	6.99214	7.01489	7.20225	7.39191	7.61098	8.02366	8.38575	8.37961	8.7047	7.20355	6.97237	7.14	7.16931	7.22571	7.27723	7.28256	7.32398	7.44804	7.61545	7.85155	7.82394	7.05021	7.01086	7.30574	7.33927	7.37333	7.59974	7.67907	7.92538	7.79387	7.8764	8.29499	7.05585	7.13164
GL50803_98054A	11.4222	11.9292	12.3424	12.1731	11.7275	11.4755	11.1646	11.0809	11.0041	10.7337	9.03303	12.0391	9.76754	10.9568	11.0876	10.6824	10.4625	10.4645	11.1288	9.84849	10.2798	10.4238	9.81849	9.88637	9.64145	11.0667	11.0668	10.6254	10.5711	10.6553	10.3483	9.60267	9.81338	8.01534	10.684
GL50803_16127	7.44675	7.28097	7.42068	7.53393	7.69461	7.79893	7.94104	8.21901	8.18211	8.33833	12.2327	7.47118	7.54366	7.34557	7.44551	7.65852	7.72554	7.96901	7.95364	8.00817	8.11375	8.20819	11.1094	7.84677	7.49585	7.69176	7.78024	8.02324	8.22366	8.1999	8.38562	8.78477	8.49082	10.5707	7.75635
GL50803_16126	4.99725	4.95556	5.01255	5.03409	5.34657	5.45661	5.70925	5.8914	5.72739	5.92351	7.74739	5.20671	5.22228	5.24313	5.13244	5.47427	5.45793	5.72432	5.68868	5.62572	5.78869	5.90066	7.23886	5.65212	5.32863	5.42649	5.5044	5.68166	5.70172	5.77909	5.86523	6.05808	6.03167	6.58999	5.48659
GL50803_26749	3.75095	3.83476	3.84093	4.25593	4.39057	4.65558	4.84423	5.38887	5.12395	5.42125	6.4973	4.01638	4.34449	4.04409	4.23706	4.52766	4.50953	4.78268	4.84611	4.86521	5.04608	5.43864	5.72648	4.41328	3.98441	4.20758	4.32625	4.60901	4.85947	5.01594	4.96844	5.51606	5.42747	5.56412	4.20479
GL50803_3475	7.07931	6.94733	7.19948	7.25595	7.4135	7.47614	7.48981	7.61911	7.63959	7.71805	9.08707	7.04613	6.95109	6.94159	7.21787	7.0341	7.06596	7.07187	7.19269	7.27283	7.33745	7.40426	8.75525	6.99347	6.76712	7.05084	7.15782	7.24734	7.34995	7.46109	7.26191	7.38273	7.61108	8.40699	6.9076
GL50803_16125	10.7696	10.2799	10.3847	10.3049	10.8635	10.8211	11.4248	11.5914	11.6614	11.6412	10.2894	10.4929	10.5236	10.1273	10.0342	9.46451	9.29039	9.26898	9.24912	9.59963	10.5867	10.509	10.1299	9.53177	9.21164	9.61871	9.25745	9.3394	9.43869	10.5528	10.1646	10.3102	10.9585	9.26495	9.60607
GL50803_14460	8.69435	8.81935	8.77103	8.68677	8.58139	8.54629	8.5487	8.48388	8.52324	8.46153	9.03422	8.745	8.99161	9.01191	9.01089	9.04825	9.13243	9.01389	8.9136	9.01503	8.93525	8.8112	8.25182	9.16321	9.24655	9.0941	9.05919	9.05178	9.07256	8.89587	8.83103	8.8309	8.82779	8.2765	9.22658
GL50803_16124	9.00424	9.07048	8.99351	8.73505	8.26416	8.05209	7.80701	7.50986	7.56629	7.36564	6.02623	9.06162	9.25763	9.35398	9.30239	8.71862	8.44696	7.93206	7.7524	7.41818	7.34363	7.07972	6.63648	8.13028	8.99908	9.09096	8.44185	8.22803	7.54482	7.21699	7.34613	7.19466	7.08797	6.06133	8.71662
GL50803_7474	6.1357	6.15057	6.1209	6.00069	5.8172	5.73834	5.73105	5.65889	5.78046	5.6425	4.40144	6.15304	6.33983	6.31192	6.21149	6.3658	6.3481	6.55459	6.31211	6.44361	6.16486	6.09604	4.78082	6.63599	6.56147	6.28237	6.21818	6.25478	6.21703	6.01773	6.14779	6.20133	5.94599	4.77288	6.40297
GL50803_137708	2.69394	1.80311	1.69239	2.23806	2.27489	2.55106	2.53061	2.666	2.24861	2.05073	3.69437	1.79706	1.27203	1.41852	1.50627	0.90021	1.28518	1.36658	1.25416	1.03292	1.86094	1.49289	3.8711	2.60713	2.49841	2.56072	2.57188	2.54211	2.5883	2.68792	2.93759	2.79804	2.82821	5.67935	1.68556
GL50803_137707	3.19262	2.68353	2.65206	2.682	2.86049	2.96148	2.92031	3.44581	2.92773	3.13817	4.23313	2.44522	2.01358	1.96585	1.48029	1.36788	1.69136	1.93207	1.95894	1.27809	2.0956	2.2891	4.04972	3.24395	2.83711	3.21966	3.16931	2.87704	3.5043	3.365	3.59288	3.83032	3.66794	6.5251	2.57188
GL50803_6619	3.65655	3.70343	3.9768	4.46866	4.7448	4.97895	5.49668	5.73395	5.72607	5.90011	5.88609	3.93065	4.08502	3.88759	3.89762	4.41619	4.61697	4.81348	4.98947	5.11639	5.31186	5.4597	6.58138	4.42954	4.09033	3.9662	4.13573	4.83275	5.3266	5.43749	5.50028	5.70002	5.71195	6.0305	4.32323
GL50803_16428	4.66361	4.80933	4.68511	5.5481	5.98087	6.23492	6.66034	7.06106	6.95494	7.39219	7.26062	4.71966	4.92583	4.90002	4.91215	5.50789	5.64217	5.70802	6.06593	6.18734	6.51026	6.70731	6.99748	5.29376	5.13824	4.93236	5.36476	6.04144	6.27547	6.59508	6.68569	7.12664	7.27666	7.10424	5.16516
GL50803_14259	2.00945	2.46502	4.11344	9.02039	9.748	10.0792	10.4705	10.7784	10.7379	10.7732	10.3658	2.49916	2.16364	2.62469	4.03778	8.62179	8.92462	9.45954	10.2685	10.1935	10.608	10.8019	10.9229	2.72774	2.68311	3.44891	7.8824	9.88154	10.4528	10.3776	10.7336	10.7986	10.6848	9.85958	2.44204
GL50803_6624	7.0714	7.10467	7.23272	8.17835	8.57056	8.70268	8.91671	9.08039	9.07101	9.11477	11.8295	7.19092	7.20827	7.25383	7.4107	7.93193	8.10239	8.12244	8.48394	8.58655	8.83764	8.86367	10.8897	7.37179	7.40063	7.36395	8.12158	8.69088	8.9675	9.03238	8.9905	8.91287	9.21217	10.5997	7.37972
GL50803_6625	5.69747	5.64847	5.66536	5.82024	6.04965	6.18785	6.34762	6.76097	6.66188	6.94896	10.7479	5.67496	6.01727	5.86608	5.805	6.21206	6.40092	6.53316	6.7173	6.76094	6.6973	6.78933	10.1749	6.40718	6.20188	6.05758	6.23015	6.46394	6.70294	6.66337	6.69541	6.98432	6.82421	9.47829	6.06632
GL50803_6626	5.85313	5.79057	5.89578	5.92342	6.18575	6.47278	6.6127	6.97085	6.95325	7.06924	10.0156	5.74779	6.06574	5.99488	5.87769	6.29405	6.56956	6.7283	6.8118	7.10821	6.99207	7.26013	9.61709	6.39812	6.06098	6.04067	6.24005	6.50454	6.8278	6.8473	7.04302	7.31989	6.93603	9.2435	6.02156
GL50803_16427	5.95712	5.98048	6.38795	6.44158	6.6737	6.83913	7.14229	7.42757	7.393	7.56548	9.83609	5.97772	6.04332	6.00531	6.25523	6.14371	6.26795	6.35095	6.5241	6.74127	7.20413	7.45759	10.0314	6.03133	5.78878	6.16969	6.28091	6.58719	6.57355	7.11357	6.97765	7.37684	7.72985	9.30323	5.89081
GL50803_6672	5.60107	5.63706	5.73964	5.80935	5.92574	5.96997	6.24153	6.35481	6.3818	6.44619	6.48069	5.52539	5.64862	5.56466	5.79844	5.74292	5.85575	5.91153	5.89838	6.07219	6.2331	6.33326	6.2666	5.68229	5.45774	5.66442	5.63921	5.83808	5.84005	6.12514	6.00823	6.3558	6.47728	6.72542	5.66087
GL50803_6671	8.16043	8.14267	8.16493	8.21801	8.18502	8.26577	8.32714	8.55156	8.56534	8.6273	11.8113	8.22908	8.31212	8.23943	8.32001	8.32083	8.26339	8.28305	8.20856	8.27323	8.29683	8.26987	10.2257	8.1198	8.28689	8.42518	8.37378	8.39658	8.40944	8.32567	8.44307	8.68123	8.52854	9.76339	8.32217
GL50803_23930	5.18931	5.0931	4.93739	5.20054	5.13903	5.31357	5.27908	5.07917	5.08743	5.13086	5.81056	5.31594	5.33202	5.06191	5.06196	5.40622	5.31686	5.42686	5.47608	5.16674	5.18614	4.9974	5.73695	5.36988	5.40616	5.44375	5.41807	5.45532	5.35905	5.16379	5.21167	5.3668	4.93677	4.9945	5.43491
GL50803_14270	5.78486	5.58034	5.66747	5.68207	5.5969	5.65673	5.6703	5.73251	5.78046	5.69289	10.1847	5.8551	5.95802	5.67325	5.70761	5.77716	6.05805	6.06341	6.15762	6.37032	6.16271	6.20192	9.47106	6.02171	5.49525	4.99457	4.96474	5.32916	5.5982	5.67785	5.74691	5.78595	5.34355	8.56788	5.63139
GL50803_6666	8.30072	8.31745	8.41112	8.46082	8.85472	8.94422	9.20615	9.49778	9.47966	9.54265	8.56531	8.30605	7.41612	7.75684	7.73494	7.90523	8.00636	8.35373	8.78773	8.45289	8.92354	9.10057	8.93691	8.07554	7.83326	7.89237	8.14074	8.3009	8.66818	9.07246	9.13789	9.31493	9.38544	8.3322	7.98796
GL50803_6664	8.92883	8.18161	8.2907	8.38136	8.45465	8.62224	8.54178	8.68254	8.68168	8.7277	7.94298	9.00346	8.56702	8.24774	8.26117	8.34977	8.4026	8.65945	8.65482	8.64663	8.72475	8.84077	10.0158	8.83459	7.89332	8.21386	8.1952	8.24335	8.40985	8.53385	8.8455	8.87897	8.89236	10.4685	8.81073
GL50803_14269	4.77863	4.82377	5.01919	4.86407	5.25384	5.31253	5.68852	5.67988	5.78173	5.99755	5.6465	4.95257	4.93514	4.94162	5.03767	5.10847	5.11905	5.17346	5.12218	5.41601	5.68156	5.63967	5.37518	5.09607	5.05905	5.1393	5.03921	5.13165	5.00689	5.46025	5.14896	5.3335	5.84994	5.06575	5.11456
GL50803_92095	7.37395	7.43899	7.19215	7.09806	7.07528	6.95612	6.96339	6.91185	6.91556	6.97465	10.2668	7.63071	7.59923	7.66339	7.61697	7.94343	7.71228	7.72658	7.40463	7.30474	7.35546	7.44356	9.25765	7.82696	7.83904	7.93997	7.73929	7.74588	7.48803	7.54512	7.51546	7.66812	7.79932	9.12418	8.04986
GL50803_16426	7.23387	7.39226	7.06711	7.02798	7.00774	6.855	6.91184	6.77707	6.78164	6.8514	9.05377	7.47623	7.47394	7.61392	7.46178	7.75553	7.62745	7.55986	7.27119	7.26441	7.20518	7.27803	7.88442	7.7213	7.86554	7.81789	7.6541	7.62259	7.40129	7.43643	7.4226	7.51112	7.53899	7.62724	7.85345
GL50803_112550	6.5936	6.47826	6.54118	6.59623	6.5621	6.62569	6.67938	6.76659	6.60776	6.67962	10.198	6.74081	6.9303	6.7337	6.72081	6.94376	7.07494	7.13064	7.08801	7.20681	7.11902	7.23643	10.0086	7.19428	6.83574	6.69933	6.6725	6.76827	7.02112	6.97766	7.01743	7.23529	7.13407	9.30553	7.05274
GL50803_137705	6.14616	6.18007	6.07542	6.1805	6.0805	6.13742	6.28914	6.2584	6.30524	6.40748	8.71337	6.21177	6.47358	6.36595	6.37812	6.42938	6.58222	6.51297	6.55687	6.65302	6.63812	6.80519	8.70146	6.417	6.46079	6.32304	6.28187	6.32352	6.58298	6.52196	6.72163	7.10214	6.82294	8.43963	6.45087
GL50803_15196	6.90823	6.76696	6.75126	6.73918	6.60354	6.65029	6.79447	6.98538	6.98006	7.04859	11.1221	6.98246	6.99179	6.84816	6.78654	6.95986	6.90463	7.11011	7.20689	7.14151	7.00714	7.19097	9.94939	7.23694	7.04254	6.72989	6.69427	6.85193	6.99364	6.90153	7.02721	7.28983	6.87206	9.26377	7.18462
GL50803_17069	7.1681	7.06327	7.07988	6.96838	6.71965	6.66469	6.60461	6.50271	6.66395	6.60066	6.27771	7.27836	7.43223	7.29407	7.35014	7.44557	7.57178	7.50706	7.35007	7.34985	7.01312	7.0482	5.68381	7.66884	7.41416	7.32909	7.32948	7.32116	7.34655	6.94145	7.03079	6.94015	6.58934	5.48184	7.61914
GL50803_17068	5.54596	5.68057	5.63972	5.40867	5.20513	5.14894	5.02933	4.96406	4.98967	4.86245	6.33428	5.42272	5.75754	5.66889	5.64469	5.71047	5.83365	5.76033	5.71031	5.73371	5.43286	5.57679	5.97672	5.73295	5.83339	5.55115	5.49947	5.40974	5.39574	5.15452	5.29241	5.29366	5.02519	5.71303	5.68618
GL50803_10400	5.92374	5.94392	5.74966	5.7373	5.65481	5.49395	5.40305	5.34072	5.49621	5.5621	5.67111	5.94894	6.25227	5.98555	5.92419	6.13396	6.27453	6.32357	6.36177	6.48464	6.10896	6.16178	5.38853	6.56932	6.20942	5.82713	5.73195	5.93532	6.21796	6.06898	6.06728	6.06373	5.73095	5.54865	6.24403
GL50803_112553	3.35372	4.32371	4.21529	5.00711	5.55019	5.88328	6.05754	6.34452	6.24573	6.288	3.57425	3.14883	2.77418	3.83661	3.52456	3.86177	3.87544	4.12331	4.80362	4.34579	5.19248	5.26405	4.54692	3.14502	4.14249	3.40023	4.4678	4.73945	4.97859	5.6504	5.58633	5.64379	5.66897	4.5795	3.30912
GL50803_10410	6.08948	5.93463	6.15448	6.35006	6.4941	6.61429	6.62294	6.70427	6.74304	6.75923	6.2502	6.14566	5.6041	5.65865	5.72983	5.81061	5.84253	5.9651	6.40409	5.7117	6.18726	6.42179	6.05692	5.91026	5.7518	5.91266	6.14839	6.04833	6.15612	6.40637	6.49121	6.41359	6.32036	5.58852	5.9547
GL50803_29181	6.65511	6.36922	6.48231	6.44057	6.66041	6.74082	6.90885	7.05419	7.02688	6.98429	8.94973	6.54476	5.97278	5.92339	5.90112	5.94162	5.92952	6.15344	6.35099	6.00034	6.28744	6.73277	7.8284	6.21608	5.85038	6.00971	6.07394	5.89135	6.08744	6.40324	6.72036	6.77704	6.66115	7.53767	6.23671
GL50803_92132	8.17043	8.3425	8.41143	8.31828	8.09404	7.9285	7.89652	7.79747	7.73054	7.85767	7.38485	8.19731	8.11383	8.15741	8.3575	7.55706	7.43643	7.2138	7.04974	7.15692	7.2362	6.98786	6.62901	7.18042	7.64271	7.87371	7.61392	7.37233	7.18587	7.26	7.20593	7.08	7.3627	6.95741	7.44084
GL50803_92134	7.1282	7.00804	7.21836	7.16977	7.02736	6.95411	6.83025	6.7525	6.9144	6.99337	6.07868	7.37168	7.21497	7.10937	7.40984	7.26253	7.27027	7.02494	6.91984	6.80989	6.89495	6.76415	5.87925	7.14245	7.2506	7.37838	7.40272	7.37917	7.11062	6.94898	6.88956	6.61945	6.77993	6.55791	7.53739
GL50803_40369	8.26224	8.48543	8.49034	8.4413	8.39854	8.36395	8.34955	8.25068	8.14038	8.09023	7.67013	8.25968	7.76136	8.10856	8.06624	7.5092	7.41277	7.21236	7.31016	7.41818	7.54167	7.32565	7.22653	7.06391	7.56656	7.70613	7.70396	7.47761	7.59588	7.81286	7.69662	7.73941	7.93044	7.55479	7.20935
GL50803_112557	7.71183	7.85475	7.6573	7.71533	7.42649	7.3737	7.36903	7.33889	7.20505	7.26139	10.0833	7.7271	7.38548	7.61013	7.49581	7.31441	7.10617	6.90136	6.90719	6.73679	6.94527	6.79555	8.98273	7.11758	7.38031	7.61918	7.47451	7.2632	6.97833	7.06292	6.87767	6.64153	7.05443	8.43164	7.46715
GL50803_3957	7.2047	7.19023	7.56782	7.70822	7.96898	8.24744	8.30165	8.48857	8.34092	8.33575	10.6741	7.29703	7.43961	7.22934	7.47869	7.26566	7.42834	7.29426	7.66055	7.73641	7.99844	7.90935	9.29592	6.90902	7.18946	7.36032	7.4945	7.67836	7.82684	8.03102	7.9728	8.05582	8.36941	9.08372	7.25397
GL50803_3958	6.22173	6.34338	6.37376	6.74572	7.22404	7.48729	7.68808	7.77429	7.72329	7.77207	9.36827	6.24471	6.32752	6.32215	6.37284	6.69783	6.76968	7.01283	7.32275	7.31765	7.71395	7.68589	8.51578	6.55531	6.52944	6.70792	6.93577	7.24184	7.537	7.80369	7.88214	7.97416	8.14598	8.3322	6.61363
GL50803_26917	4.55615	4.82664	4.95482	5.40247	6.10495	6.51199	6.97656	7.15242	7.09745	7.20608	6.35113	4.8395	4.80414	4.93921	4.82712	5.13021	5.16757	5.34841	5.72101	5.93033	6.4077	6.49333	6.2472	4.30816	4.85297	5.06764	5.36657	5.77725	5.9959	6.78616	6.43897	6.70076	7.27712	6.23367	4.55811
GL50803_17065	7.35504	7.43382	7.55474	7.84859	8.42444	8.78444	9.21439	9.49504	9.41574	9.47596	8.28585	7.33923	7.37226	7.41542	7.47376	7.56071	7.60316	7.73163	7.98977	8.23722	8.61788	8.6898	8.82603	7.08408	7.45994	7.56895	7.81212	8.16901	8.45992	8.97585	8.91782	9.11022	9.39728	8.74146	7.20519
GL50803_17064	3.23679	3.03099	3.24615	3.59981	3.8989	4.11651	4.38269	4.73389	4.65179	4.89725	5.28443	3.49916	3.42962	3.11861	3.34191	3.371	3.49088	3.64132	3.86514	4.14021	4.53943	4.82686	4.8596	3.58321	2.85646	3.18724	3.44746	3.95734	4.04762	4.59561	4.68875	5.35024	5.36976	5.01264	3.4565
GL50803_17063	11.9407	12.53	12.7049	12.7152	12.8065	12.9034	12.8078	12.818	12.6911	12.532	10.5913	12.1887	9.93417	11.3746	11.3361	10.747	10.4802	10.4441	10.9776	10.3977	11.416	11.4088	11.2045	10.0523	10.6277	11.2034	11.3074	10.9739	11.1273	11.8684	11.7452	11.8656	12.2853	10.8129	10.1523
GL50803_13504	6.33883	6.1957	6.38152	6.49499	6.73316	6.83949	6.8811	7.01223	7.03915	6.99888	7.29665	6.36488	6.46477	6.33322	6.32985	6.42059	6.47277	6.56217	6.81108	6.7995	6.95401	7.01123	7.29546	6.20478	6.22811	6.2425	6.36113	6.62833	6.86098	7.01247	6.93181	7.20134	7.21726	7.29238	6.18522
GL50803_17062	6.80346	6.67035	6.71898	6.6364	6.50201	6.40236	6.20598	5.91941	5.98401	5.8071	6.71887	6.95257	6.54218	6.50875	6.51314	6.59637	6.53299	6.53239	6.37827	6.41265	6.25952	6.13366	5.662	6.61553	6.57321	6.48434	6.66737	6.58245	6.61939	6.40715	6.41644	6.42505	6.2028	6.05915	6.60355
GL50803_137704	5.7487	5.9333	6.05939	6.09596	6.098	6.08699	5.86522	5.84035	5.69134	5.60747	5.08273	5.8382	5.83416	5.99953	5.96339	6.02102	6.09011	6.10653	6.12118	6.32329	6.18726	6.18516	4.86597	6.01202	6.01545	6.11795	6.29142	6.28714	6.27009	6.36837	6.17118	6.34377	6.347	5.45886	5.98221
GL50803_11178	6.76627	6.63474	6.67023	6.68998	6.64462	6.65359	6.4766	6.29288	6.29193	6.114	6.06575	6.85897	7.0497	6.84623	6.88138	6.92521	7.03627	7.06282	6.99478	7.08423	6.84551	6.80929	6.46231	7.0371	6.74653	6.63917	6.6422	6.80936	6.87699	6.73668	6.82082	6.89775	6.67102	6.20634	6.93902
GL50803_11177	5.67517	5.72435	6.60107	6.97118	7.28032	7.55312	7.42192	7.51321	7.46475	7.1598	8.39626	5.60596	5.45357	5.37403	6.06737	5.87877	5.9987	5.98101	6.49857	6.28173	6.57803	6.46062	9.51482	5.2413	5.4609	5.88892	6.35932	6.40976	6.65215	6.67444	7.08599	7.04042	6.86286	10.4043	5.42062
GL50803_40376	7.5223	8.14956	9.89195	10.3577	10.7415	11.0746	10.9261	10.8963	10.8837	10.7314	10.8546	7.5874	7.44857	7.89407	9.07697	8.70978	8.79592	8.82291	9.42175	9.32964	9.71873	9.52233	11.5481	7.28017	7.83326	8.98929	9.50182	9.57514	9.67149	9.90445	9.8898	9.80499	10.1492	12.421	7.45703
GL50803_11174	5.08202	5.33417	5.5254	5.85848	6.08869	6.22885	6.30102	6.23021	6.25032	6.15771	7.08858	5.21278	4.67401	4.97265	5.31435	5.36345	5.31367	5.60174	6.07786	5.98639	6.30022	6.27206	6.5261	4.74748	5.13231	5.39312	5.91368	5.94764	6.21049	6.42963	6.37996	6.43467	6.37487	5.85556	4.99618
GL50803_32041	4.26767	4.52101	4.48372	4.49996	4.41312	4.44865	4.30489	4.39244	4.14016	4.10008	7.05251	4.27787	3.32022	3.98445	3.796	3.63162	3.40953	3.62405	3.82605	3.5672	3.81335	3.96573	6.65685	3.41049	3.56959	3.7108	3.62117	3.56803	3.6272	3.77155	3.8603	4.13089	3.89187	6.38063	3.29665
GL50803_11170	7.23169	7.076	7.13749	7.23285	7.37094	7.44192	7.57663	7.75145	7.81611	7.79849	9.28202	7.14883	6.80837	6.74757	6.5735	6.44525	6.31178	6.36834	6.39839	6.56696	6.85952	6.70217	9.6389	6.22821	6.372	6.24052	6.29428	6.26072	6.41929	6.80703	6.71909	6.7116	6.91423	9.84272	6.24647
GL50803_29436	7.77123	7.87847	7.75256	7.70487	7.54013	7.47591	7.39187	7.36551	7.30562	7.29032	6.79026	7.69604	7.59336	7.66777	7.62514	7.21244	7.13718	7.09817	7.19762	7.33384	7.37278	7.29033	6.63835	7.37137	7.47878	7.44417	7.28235	7.16742	7.33758	7.40783	7.38587	7.48103	7.45129	6.81216	7.35626
GL50803_33721	6.05288	5.79644	5.791	5.75362	5.73008	5.64267	5.62154	5.53924	5.49776	5.68171	6.90779	6.05178	6.10955	5.78503	5.8063	5.96381	5.92534	6.01233	5.99846	5.98423	6.01905	6.08253	5.65833	6.19054	5.7621	5.86606	5.72632	5.80596	5.91089	5.87933	5.95207	6.07608	5.99284	5.51722	6.02156
GL50803_11165	8.81526	8.68852	8.53882	8.60388	7.96771	7.84463	7.43567	7.49047	7.40501	7.55394	8.78502	8.97147	8.55726	8.37177	8.36329	7.99391	7.71953	7.37003	7.19544	6.77287	6.89495	6.7592	7.34307	7.74	7.88422	8.18747	7.97336	7.62872	7.29583	6.95487	7.12053	7.00444	6.87877	6.77809	8.1181
GL50803_11164	8.8553	8.53324	8.62925	8.54319	8.27267	8.063	7.97111	8.01165	8.01825	8.12689	6.72945	9.08867	8.34282	8.40692	8.44361	8.10442	7.84057	7.7691	7.56331	7.04802	7.22077	7.17937	6.65869	8.00758	7.74421	8.17796	8.01201	7.89488	7.56911	7.538	7.42765	7.13418	7.40641	6.35597	8.39379
GL50803_17060	10.7384	10.3833	10.4524	10.3767	9.84544	9.51839	9.25198	8.92779	8.90562	8.81461	8.45165	10.9776	9.39116	9.73169	9.70273	9.17541	8.72924	8.55795	8.67636	7.61406	8.07137	7.99601	7.93229	9.01795	8.50178	9.38297	9.18434	8.7552	8.37331	8.27072	8.42255	8.09471	8.20006	6.77144	9.4514
GL50803_112572	5.01765	4.93707	5.07125	5.02067	5.06739	4.82777	4.74863	4.72814	4.56296	4.80175	3.99657	5.10167	5.04236	4.81302	4.99474	4.69355	4.74329	4.63243	4.74196	4.73523	4.76611	4.77739	3.3409	5.04421	4.92346	4.87245	4.91862	4.79778	4.59556	4.74891	4.57829	4.79002	5.05133	3.92926	4.92506
GL50803_13223	4.3664	4.00162	4.10097	3.96204	4.17	4.01485	3.91992	4.26326	4.05026	4.19054	3.76924	4.44865	4.18592	4.33969	4.31994	3.99274	3.99976	4.23371	4.03638	3.78614	4.0506	4.21731	3.42965	4.27615	4.19282	4.26695	4.09267	4.01468	3.71956	4.11921	3.89669	4.1982	4.47508	3.7677	4.2572
GL50803_16973	7.31851	7.16832	7.0878	7.09037	6.96259	6.93964	6.87499	6.93262	6.9459	6.93437	8.69758	7.38696	7.3825	7.22538	7.24512	7.04247	7.01088	6.87908	6.81323	6.82685	6.77471	6.74926	7.06137	7.10194	7.17701	7.0654	7.08002	6.91728	6.92399	6.845	6.95086	6.89649	6.81151	6.90858	7.24832
GL50803_31978	7.75157	8.03938	8.11232	8.05171	7.91733	7.8926	7.6514	7.49132	7.38299	7.25553	6.28729	7.69134	7.1674	7.46787	7.51352	6.68587	6.58354	6.0825	6.31615	6.35787	6.40406	6.2154	6.36215	6.26944	6.87362	7.13345	6.79778	6.66386	6.51563	6.53416	6.43743	6.30898	6.48129	6.98868	6.46835
GL50803_7696	5.58749	5.54764	5.73964	5.84483	6.1084	6.31064	6.44315	6.68512	6.62909	6.6307	10.0666	5.72392	5.56567	5.23725	5.41719	5.35003	5.43168	5.56902	5.70263	5.80635	5.95708	5.86427	8.28431	5.14218	5.27212	5.15824	5.27515	5.27347	5.70836	5.95607	5.96712	6.02021	6.00516	7.69693	5.13221
GL50803_115572	6.39644	6.86381	6.8644	6.92435	6.86305	6.83913	6.63744	6.43639	6.3641	6.29291	6.17303	6.57254	6.34158	6.70982	6.78389	6.23687	6.17782	5.85467	6.10377	6.15701	6.36996	6.20816	5.89804	5.86196	6.59281	6.67103	6.61202	6.45102	6.24746	6.37876	6.14212	5.95238	6.53478	6.80306	6.00442
GL50803_135886	0.899976	1.13209	1.72526	1.34033	1.64731	1.8193	1.25907	1.51342	1.25069	0.728879	-0.687716	0.940421	0.659023	0.888236	0.984834	1.16828	1.1486	1.22101	1.47239	0.467687	1.65593	0.973854	0.334422	0.542122	1.18539	1.48278	1.58445	1.74746	1.77365	1.44491	1.91326	1.60051	1.02814	0.278938	0.712701
GL50803_16981	5.24227	5.35421	5.38588	5.29948	5.43921	5.25931	5.21091	5.26135	5.09766	5.18291	5.74484	5.3874	4.97629	5.22342	5.16949	5.12628	5.12088	5.15353	5.05855	4.81024	5.02491	5.16066	5.24428	5.24865	5.34926	5.24151	5.41108	5.39721	5.13473	5.26206	5.13189	5.14379	5.39381	5.22985	5.2074
GL50803_10912	4.25484	4.49597	4.46924	4.24673	4.43165	4.43143	4.56666	4.43541	4.44284	4.61053	6.24365	4.38919	4.29113	4.54418	4.31628	4.59177	4.43807	4.6439	4.59024	4.63427	4.5261	4.58632	5.50747	4.71336	4.61246	4.44547	4.73756	4.61829	4.396	4.65206	4.36438	4.36127	4.66487	5.20245	4.73486
GL50803_10911	8.76938	8.70851	8.70459	8.66557	8.30769	8.25589	8.01063	7.78437	7.71167	7.65208	9.29217	8.81263	8.59132	8.64554	8.81	8.3358	8.20109	8.03665	7.89683	7.72934	7.76413	7.62232	8.17624	8.19139	8.3101	8.51609	8.5465	8.27718	8.03937	7.93787	8.07258	7.82775	7.8188	7.98637	8.50432
GL50803_10908	6.51148	6.71676	6.7691	6.65129	6.44023	6.33554	6.19719	6.10827	6.15845	6.11493	5.97773	6.61668	6.82598	6.79173	6.83666	6.7524	6.76794	6.55611	6.54144	6.42304	6.26454	6.13148	5.28767	6.71307	6.86529	6.79387	6.77344	6.71232	6.44418	6.25491	6.12593	5.9141	6.13105	5.8096	6.75818
GL50803_15313	4.21565	4.30736	4.45951	4.24211	4.26397	3.99154	4.10657	3.75372	3.86131	3.64763	3.1389	4.27787	4.35839	4.44896	4.49877	4.41297	4.26718	4.17957	4.13105	4.05231	4.02714	4.17548	3.79296	4.19857	4.5001	4.55116	4.40229	4.28707	4.19872	4.01647	3.77492	3.69121	3.98525	3.54892	4.1981
GL50803_16980	7.57573	7.66561	7.72235	7.69053	7.67841	7.64312	7.48821	7.34782	7.33361	7.32228	6.5841	7.48754	7.38123	7.60366	7.84048	7.35191	7.34835	7.13267	7.15714	7.27195	7.33935	7.22057	7.19143	7.31122	7.63433	7.76978	7.71216	7.63597	7.47834	7.5437	7.39265	7.16342	7.56909	7.87362	7.46123
GL50803_10901	6.05041	5.78615	5.77735	5.77937	5.68292	5.71718	5.72155	5.70058	5.85959	5.84881	8.0345	5.98955	6.24386	5.9572	5.95634	6.15822	6.19179	6.34832	6.19974	6.35035	6.13224	6.16071	7.89615	6.42756	6.1232	5.82845	5.79645	6.01359	6.16774	5.88607	6.02271	5.9861	5.68854	7.56405	6.11506
GL50803_20066	3.98131	3.88523	4.06931	4.1114	4.09295	4.11651	4.09821	4.1301	4.02044	4.12964	6.56847	3.93065	4.11399	3.93198	4.10731	3.99705	4.32853	4.22991	4.3117	4.14409	4.0691	4.28181	4.8273	4.05923	4.03622	3.85192	4.10138	4.35154	4.13307	4.00826	4.09368	4.10042	4.00323	4.26066	3.91374
GL50803_10898	4.07187	4.19182	4.27201	4.38729	4.40189	4.41205	4.40659	4.3519	4.29053	4.32122	6.75616	4.07527	4.32692	4.06639	4.26395	4.37041	4.58027	4.54643	4.61666	4.55216	4.53611	4.49745	5.20459	4.34976	4.12265	4.06765	4.41982	4.45182	4.46039	4.40228	4.23537	4.31274	4.19526	4.45896	4.25075
GL50803_16979	7.6637	7.39806	7.31263	7.27869	7.1566	7.14166	6.98509	6.80464	6.83463	6.77627	6.92631	7.74883	7.69991	7.26833	7.29951	7.48562	7.51354	7.63147	7.6478	7.59651	7.44095	7.50353	6.65685	7.83735	7.37822	7.13345	7.2708	7.29537	7.44412	7.19137	7.49891	7.5169	7.04957	6.34885	7.62352
GL50803_10893	6.725	6.44126	6.40453	6.42231	6.33295	6.19863	6.1854	6.07016	6.18941	6.10007	5.81056	6.76371	6.47597	6.29691	6.26667	6.21206	6.13599	6.09404	5.94343	6.01415	5.96451	5.95606	5.89804	6.18768	5.86239	5.959	5.91985	5.90784	5.91204	5.86348	5.95099	6.01088	5.91903	5.29432	6.19029
GL50803_10892	7.04183	7.03809	7.07031	7.05392	6.85483	6.76851	6.71536	6.72173	6.67014	6.68524	6.25347	7.04216	6.69242	6.84816	6.92054	6.53766	6.43142	6.30653	6.30096	6.25154	6.32159	6.24401	5.89804	6.4847	6.58848	6.75776	6.65187	6.59504	6.37571	6.37637	6.36624	6.38679	6.52004	5.87553	6.65023
GL50803_15311	4.62091	4.71947	4.52631	4.57169	4.42427	4.3705	4.24556	4.22295	4.35339	4.31158	4.97616	4.59516	4.87838	4.63351	4.77999	4.8327	4.80367	4.79302	4.66493	4.71716	4.56898	4.56704	4.9343	4.84769	4.71406	4.71648	4.43714	4.54882	4.29721	4.29832	4.23537	4.37224	4.29712	4.44566	4.87981
GL50803_60307	3.74485	3.5998	3.71566	3.69079	3.95632	4.01998	4.58174	5.26334	5.42645	5.63994	6.09697	3.79167	3.5313	3.62458	3.25266	3.44228	3.45658	3.63558	3.76831	3.83005	4.07826	4.24588	4.8596	3.61768	3.47263	3.29005	3.30379	2.91769	3.21433	3.95796	3.71506	3.73153	4.20306	4.26066	3.37583
GL50803_10889	5.86021	5.82831	5.68429	5.74712	5.69063	5.79404	6.11669	6.57254	6.73781	6.94792	7.2911	5.78626	5.89742	5.69774	5.63148	5.72873	5.71653	5.87793	5.81384	5.99927	5.99264	6.04237	6.55991	5.95025	5.68709	5.42996	5.41283	5.53096	5.49898	5.72498	5.81622	5.84227	5.77999	5.81219	5.53251
GL50803_15310	7.98021	7.85686	7.95925	8.01494	7.77515	7.75942	7.56189	7.47425	7.41936	7.40169	6.72711	7.95257	7.776	7.59103	7.73322	7.27679	7.19424	6.9168	6.89847	6.87888	6.83271	6.70584	5.97967	6.96642	7.14	7.2616	7.33504	7.21202	7.16428	6.97186	7.11572	7.01673	6.78124	5.74323	7.2471
GL50803_16978	6.29563	6.07771	6.04644	6.08051	6.0364	6.15034	6.10109	6.13784	5.99061	5.96818	7.37365	6.26528	6.41326	6.11954	6.20754	6.14274	6.28353	6.3527	6.33815	6.47006	6.39767	6.46062	7.39579	6.44526	6.30228	6.11688	6.05948	6.16372	6.30908	6.45554	6.45812	6.62022	6.49723	7.02041	6.42461
GL50803_88556	7.12937	7.00488	6.89903	6.9515	6.66041	6.77838	6.67517	6.54092	6.4656	6.29291	7.96504	7.22233	7.10073	7.05966	7.1282	7.03095	7.02314	6.92564	6.98022	6.52972	6.58528	6.69552	7.15805	7.07118	7.05673	6.9108	6.88051	6.85455	6.83146	6.70081	6.97659	6.89712	6.66327	7.0069	7.19515
GL50803_34126	5.7487	5.88176	6.06261	6.04778	6.16153	6.0124	5.80613	5.78052	5.62353	5.47982	4.23313	6.08963	5.91751	5.93798	6.0242	5.65017	5.61132	5.51851	5.46885	5.4508	5.62172	5.51944	5.78484	5.60565	5.81744	5.92868	5.78702	5.76756	5.55314	5.80422	5.40246	5.39217	5.77477	6.43883	5.85406
GL50803_25011	4.55266	4.24001	4.2886	4.35769	4.60162	4.50277	4.46628	4.49077	4.65457	4.51293	5.83255	4.54796	4.94898	4.29507	4.31994	4.63113	4.69751	5.008	4.78044	4.94282	4.92942	4.77459	5.62489	4.97056	4.43081	4.50587	4.64221	4.61211	4.50991	4.67819	4.41543	4.52752	4.84757	5.24911	4.71625
GL50803_25013	7.58686	7.00804	6.83835	6.67463	6.62785	6.50697	6.61563	6.4133	6.77401	6.62941	8.79793	7.59671	7.6058	7.02649	6.84177	7.16773	7.12404	7.418	7.16778	7.27548	7.01014	7.11223	8.21421	7.76936	6.97887	6.47765	6.48953	6.61449	6.59235	6.61483	6.78123	6.69931	6.64835	7.83271	7.43516
GL50803_16975	8.61646	8.50349	8.56686	8.59121	8.48556	8.44769	8.32378	8.15565	8.09486	7.90653	6.66597	8.67459	8.62442	8.56072	8.81245	8.36632	8.35043	8.06733	8.11783	8.13953	8.16545	8.01984	7.07106	8.21902	8.46858	8.6635	8.53287	8.54566	8.39921	8.25778	8.27185	8.0889	8.13634	7.3044	8.55034
GL50803_7706	7.43495	7.39081	7.40111	7.39514	7.32758	7.37945	7.20788	7.12807	7.11972	7.06351	6.20709	7.62086	7.5345	7.51362	7.53379	7.5387	7.52875	7.50706	7.45675	7.42058	7.38714	7.23846	7.67982	7.46978	7.58734	7.54396	7.53729	7.42791	7.44492	7.26432	7.34408	7.34285	7.17874	8.27744	7.66442
GL50803_135885	1.47281	1.46262	2.01835	2.08132	1.96474	2.19979	1.84319	2.71333	2.06045	1.64256	0.999867	1.08852	1.21205	1.74035	1.92743	1.36788	1.63111	2.30872	2.28967	1.463	1.81784	1.64775	0.334422	1.27626	1.87697	1.97578	2.10146	2.08743	2.70983	2.15972	2.54918	2.45696	2.20799	1.44698	1.52382
GL50803_115571	0.661559	0.933263	0.602987	0.330206	0.718643	0.826379	0.675362	0.342171	0.283834	0.429347	0.291768	0.900892	0.746197	0.9662	0.65407	0.744836	-0.0889253	0.312846	0.282946	0.00558218	0.859667	0.348333	-1.03081	0.493455	0.632957	0.585965	0.370528	-0.447096	0.756493	0.376551	0.787858	1.13468	1.02814	1.86164	0.375984
GL50803_1695	8.04126	7.9157	7.80875	7.84135	7.604	7.54291	7.50372	7.53601	7.50068	7.41563	8.75137	8.04613	7.70502	7.76675	7.62366	7.82416	7.7369	7.85118	8.15097	7.39887	7.58007	7.9119	8.70768	7.90025	7.65795	7.70506	7.57729	7.5793	7.55886	7.40354	7.80318	7.74926	7.55355	7.70323	7.87011
GL50803_16021	5.58065	5.59051	5.6717	5.65626	5.73904	5.65673	5.46777	5.24333	5.28491	5.13997	5.20575	5.68372	5.82417	5.78503	5.9669	5.89387	5.89897	5.92335	5.71185	5.88247	5.87534	5.86163	4.88493	5.9626	5.96621	6.0224	6.00709	6.03106	5.96294	5.97516	5.87553	6.10048	6.06628	5.20245	6.02156
GL50803_3934	7.54619	7.16151	7.0347	7.069	6.75097	6.89323	6.84782	7.01223	6.9442	7.06351	11.4156	7.62428	7.6407	7.12485	7.1505	7.36698	7.32873	7.37305	7.31924	7.17642	7.13995	7.18254	9.93884	7.68146	7.20275	6.94089	6.98253	7.02702	7.25648	7.03185	7.32167	7.31658	7.02284	9.21831	7.52775
GL50803_13495	6.08586	5.71353	5.68638	5.73401	5.65007	5.68445	5.54824	5.48914	5.28491	5.26181	6.20372	6.16769	6.18657	5.83913	5.99009	6.11326	6.2696	6.39744	6.16659	6.36203	6.13224	6.10832	5.95596	6.35109	5.88494	5.86478	5.93456	5.95132	6.16966	5.99192	6.19694	6.29943	5.86967	5.3054	6.23426
GL50803_137703	9.50316	9.71076	9.79077	9.7565	10.051	10.143	10.4599	10.7434	10.8325	10.835	8.88388	9.6449	9.67032	9.89819	9.83584	9.83635	9.80905	9.70362	9.81126	9.50976	9.80248	9.5978	8.52437	9.56849	10.1202	10.0305	9.84874	9.95272	9.76663	9.76058	9.68677	9.4178	9.69889	8.18745	9.82128
GL50803_137702	6.04172	5.82831	6.01522	5.93635	5.93745	5.87481	5.76973	5.5244	5.53891	5.37416	4.64948	6.09183	5.52926	5.24117	5.30514	5.48506	5.45503	5.67625	6.08734	5.62295	5.62953	5.92106	5.40175	5.99027	5.62076	5.53675	5.79107	5.73238	5.91204	5.90721	6.07821	5.96693	5.67739	4.65075	5.88666
GL50803_60315	2.99075	2.6708	2.93098	2.90886	2.8822	2.65362	2.70594	2.13394	1.99186	2.06611	0.999867	3.04386	1.61084	2.03983	2.1742	2.26901	2.18599	2.39271	3.27428	1.24963	2.52884	3.12342	2.03191	2.94238	2.62789	2.45576	3.10141	2.40587	2.66681	2.9158	3.28507	3.05567	3.04326	2.33526	3.17251
GL50803_137701	6.63545	7.99475	8.34193	8.45733	8.61582	8.74104	8.6626	8.76538	8.72657	8.71997	7.20776	6.69388	6.27626	7.33689	7.42438	7.51372	7.74403	7.88722	8.46929	7.89414	8.13064	8.0986	7.76841	6.52838	7.66139	7.79824	8.07753	8.22449	8.44866	8.43044	8.41591	8.27943	8.24724	7.49635	6.54809
GL50803_111987	8.38631	8.39931	8.55004	8.59348	8.77753	8.78067	8.76882	8.86582	8.97015	9.04568	7.65725	8.43942	7.47832	8.01736	8.05088	8.15013	8.05827	8.35939	8.98932	7.90073	8.46758	8.8521	8.02351	8.22368	8.17674	8.32583	8.55485	8.3493	8.51364	8.64299	8.81463	8.81959	8.72324	7.53453	8.43473
GL50803_4313	4.52799	4.29497	4.33725	4.32747	4.31276	4.29211	4.13954	4.3815	4.24704	4.30835	4.26582	4.50247	1.86569	2.86751	2.85806	2.84836	2.50972	2.51018	4.02162	1.92566	2.75135	3.97063	3.75224	2.93329	2.85646	3.33514	3.63924	2.60569	3.46089	3.66062	3.97959	3.88752	3.77119	4.59765	3.61553
GL50803_34713	5.91152	6.16426	6.33302	6.25004	6.2777	6.14624	6.21083	6.15401	5.97848	6.09445	4.10892	6.14037	5.84531	6.21943	6.28835	6.19808	6.16549	6.29294	6.17883	6.18921	6.32159	6.29763	4.92212	6.201	6.34229	6.33696	6.55684	6.49617	6.25201	6.46682	6.13547	6.09718	6.52859	5.47531	6.18438
GL50803_14897	6.81516	6.79509	6.81849	6.72186	6.76273	6.64946	6.53429	6.52691	6.50228	6.48817	5.90904	6.82901	6.76401	6.72181	6.7799	6.35996	6.35743	6.29657	6.24701	6.39164	6.40315	6.2581	6.18991	6.44206	6.59857	6.61272	6.50522	6.3395	6.39231	6.34001	6.36461	6.49698	6.28315	6.1085	6.56443
GL50803_23492	8.2585	8.18608	8.08487	8.20916	7.7646	7.635	7.46685	7.27182	7.31486	7.2374	6.3435	8.3836	8.32147	8.04317	8.11506	7.46748	7.11993	6.87787	6.79237	6.63731	6.70175	6.55253	6.17971	6.82731	7.28581	7.74215	7.27514	7.07554	6.98819	6.82585	6.92962	6.93646	6.86286	6.13566	7.34722
GL50803_9198	4.60752	5.08832	5.23428	5.23117	5.23708	5.17791	5.11056	5.02159	4.88481	5.02272	6.33889	4.75888	4.68783	5.0418	5.14076	4.901	4.78074	4.62377	4.57685	4.7807	5.02491	4.77459	5.40175	4.46468	4.90034	5.12653	5.14418	5.15734	4.84024	5.06627	4.60876	4.75412	5.28782	5.51085	4.70214
GL50803_9196	8.00501	7.96508	7.93267	7.79083	7.82646	7.75135	8.08947	8.48004	8.6861	8.93254	9.03753	7.95408	8.09631	8.12272	7.96832	7.78325	7.79526	7.66739	7.69854	7.64785	7.76661	7.8917	8.05314	7.81122	7.89332	7.75638	7.40844	7.37324	7.35885	7.52942	7.45078	7.55271	7.59747	7.87238	7.7862
GL50803_14895	8.17724	8.30103	8.26193	8.13445	7.87464	7.76057	7.67303	7.64069	7.59512	7.61074	7.57095	8.13665	8.24262	8.37936	8.32936	7.92375	7.77394	7.49246	7.39989	7.35153	7.35546	7.28247	6.84286	7.63032	8.06295	8.20655	7.85914	7.65413	7.52538	7.33211	7.42727	7.50656	7.38258	6.79784	7.88606
GL50803_9194	5.97939	6.24161	6.13473	6.17081	6.22345	6.16662	6.03363	6.0994	6.01134	6.13966	6.86256	6.17185	5.90217	6.07405	5.96807	5.83369	5.85575	5.75108	5.7995	5.75917	5.86214	5.84971	5.74042	5.85113	5.89783	6.03726	5.99077	5.93409	5.75788	5.9061	5.72051	5.82773	6.23643	5.79657	5.89805
GL50803_17536	6.41482	6.34639	6.31559	6.22098	5.98087	5.9317	5.96975	6.1335	6.03497	6.14691	9.64696	6.50988	6.62214	6.45315	6.40857	6.3608	6.26712	6.20177	6.13152	6.03931	5.88712	6.2308	8.48246	6.18193	6.52037	6.43169	6.13146	6.12844	6.09861	5.87256	6.07226	6.43555	6.28315	7.75669	6.39641
GL50803_23496	7.69095	7.97806	7.82116	7.65446	7.12848	6.82821	6.59424	6.36688	6.38431	6.29617	5.01128	7.72851	7.58156	7.96284	7.88044	6.98177	6.68456	6.36575	6.21926	6.18452	6.17023	6.14779	5.36622	6.6747	7.41823	7.6563	6.95514	6.7634	6.38818	6.25751	6.19785	6.11905	6.2987	6.18849	6.92896
GL50803_17538	7.40912	7.43523	7.37416	7.24733	7.01574	6.94504	6.94077	6.82228	6.78037	6.71053	7.21196	7.38248	7.20009	7.30161	7.25137	6.89146	6.78416	6.47895	6.45714	6.3301	6.33789	6.27998	6.06526	6.78749	6.93063	7.10445	6.90747	6.72598	6.61869	6.59577	6.51481	6.39577	6.36187	5.99215	7.02183
GL50803_14874	6.76928	6.54168	6.43466	6.45562	6.12785	5.98513	5.80356	5.65586	5.56718	5.57693	7.99897	6.83492	7.0888	6.80836	6.81474	7.04507	7.07777	7.18612	6.96102	7.0807	6.6389	6.74997	7.21159	7.35018	6.8093	6.74668	6.74382	6.7388	6.75906	6.38512	6.5938	6.4268	6.15838	6.67504	7.09386
GL50803_9121	8.38115	8.24443	8.11154	8.09175	7.73283	7.66272	7.46075	7.32705	7.31749	7.19607	8.30682	8.50226	8.44204	8.13015	8.1727	8.36215	8.41345	8.38739	8.25765	8.25478	7.9534	7.9409	7.31772	8.61296	8.29134	8.12839	8.22242	8.19197	8.23152	7.89424	8.05709	8.00062	7.53127	6.98639	8.51445
GL50803_9119	5.59938	5.68849	5.68429	5.38161	5.26834	5.09163	5.00045	5.07238	5.1693	5.3382	5.72382	5.70826	5.39408	5.63647	5.51957	5.42553	5.17286	5.471	5.2689	4.89996	5.11447	5.25002	4.74668	5.53677	5.44182	5.63918	5.47284	5.23579	5.1426	5.06627	5.04945	5.18585	5.26006	4.96684	5.60887
GL50803_9118	6.31328	6.26403	6.22512	6.10234	6.14815	6.05675	6.08425	5.91941	6.12079	5.96818	7.58202	6.2894	6.43884	6.40846	6.26287	6.31059	6.30457	6.4042	6.35492	6.45612	6.23105	6.41371	7.13712	6.38651	6.30052	6.16137	5.98959	5.97679	6.06068	6.11561	6.19694	6.42241	6.18814	6.50601	6.26258
GL50803_9117	8.0275	7.89601	7.90155	7.80147	7.55118	7.5707	7.48541	7.4452	7.42547	7.44606	10.2367	7.95799	7.59336	7.62635	7.55766	7.21568	7.03482	7.07823	6.9815	6.83465	6.87341	6.95856	8.72269	7.22768	7.28269	7.37119	7.1599	7.13977	7.10861	7.04847	7.20093	7.31564	7.03654	8.17693	7.36412
GL50803_9116	7.40671	7.48925	7.53227	7.51251	7.50163	7.5082	7.53465	7.63571	7.76532	7.77471	8.89541	7.53026	7.5448	7.57595	7.57118	7.49212	7.42465	7.42259	7.44896	7.41057	7.43606	7.45365	7.96235	7.31429	7.49005	7.48684	7.45424	7.31547	7.41354	7.39568	7.51106	7.61523	7.35398	7.4287	7.44825
GL50803_9115	9.82471	10.4762	10.8875	11.004	11.1275	11.2475	11.0755	11.1153	10.9879	10.8673	9.435	9.92881	9.01223	9.77099	9.8364	9.48461	9.50403	9.4387	9.85967	9.41402	9.76255	9.65037	9.08498	8.58819	9.07188	9.61871	9.73684	9.60462	9.77765	9.96652	9.96769	10.0228	10.0679	8.55091	8.75001
GL50803_14872	8.64808	8.74426	8.64624	8.65973	8.42444	8.38012	8.32356	8.32373	8.29962	8.34976	9.44467	8.7359	8.489	8.54353	8.67483	8.28095	8.11459	7.9936	7.90389	7.97024	8.02118	7.94961	8.05454	8.08917	8.3501	8.46608	8.40514	8.20461	8.14404	8.16707	8.18281	8.21817	8.30385	7.82503	8.26972
GL50803_111973	7.27681	7.60292	7.77726	7.51347	7.39993	7.29364	7.30689	7.1535	7.28023	7.13769	8.19543	7.36715	7.42482	7.85841	7.88663	7.78574	7.71893	7.72726	7.73178	7.48533	7.52292	7.53446	10.1301	7.5181	7.46703	7.90769	7.74138	7.55293	7.49342	7.37107	7.30696	7.32461	7.35047	10.496	7.53307
GL50803_17539	3.02138	3.31898	3.50466	3.33924	3.6304	3.56305	3.46655	3.57312	3.44008	3.67797	4.30409	2.67349	2.77418	3.03967	2.99277	3.11747	3.14094	3.24164	3.17999	3.17161	3.55572	3.4664	4.53896	2.94238	3.3754	3.12869	3.0751	3.34774	3.09771	3.47042	3.05492	2.87205	3.76067	4.85563	2.77428
GL50803_14869	7.2905	7.37373	7.2922	7.12529	6.8854	6.75358	6.63888	6.43021	6.5069	6.51082	6.39907	7.47455	7.49218	7.55087	7.43794	7.65545	7.61972	7.68033	7.60967	7.59404	7.20831	7.16875	6.19245	7.78113	7.6441	7.48183	7.29285	7.25826	7.29274	6.94199	7.05111	6.85276	6.6455	5.62731	7.39734
GL50803_14868	7.52765	7.39226	7.37674	7.36941	7.23779	7.20945	7.14737	7.13406	7.17491	7.09289	6.28251	7.57882	7.79306	7.46326	7.50831	7.50012	7.59562	7.54961	7.45538	7.60952	7.43606	7.47277	6.40437	7.60942	7.44843	7.33372	7.22067	7.19145	7.24693	7.28953	7.24525	7.1261	6.98094	5.90497	7.49265
GL50803_17540	5.55122	5.64196	5.84059	5.78255	5.79305	5.62173	5.51878	5.32176	5.35315	5.25512	4.89908	5.66024	5.65003	5.79308	5.8727	5.80447	5.84474	5.89842	5.67775	5.99927	5.8218	5.70581	5.02255	5.74599	5.82114	6.0155	6.00593	6.10663	5.82668	5.84284	5.62208	5.65131	5.83371	5.32368	5.68379
GL50803_17541	7.42066	7.64257	7.59253	7.5569	7.4334	7.39631	7.2334	7.00571	7.00475	6.92702	5.79721	7.44394	7.53718	7.65348	7.72668	7.55195	7.41798	7.36744	7.30458	7.44589	7.39265	7.33185	6.36215	7.38353	7.68897	7.77252	7.7118	7.68684	7.60907	7.49125	7.46977	7.43031	7.53436	7.11163	7.50761
GL50803_11191	4.78757	4.72256	4.78982	4.62236	4.65305	4.39636	4.51106	4.68429	5.12194	5.07875	5.42129	4.97891	5.13815	5.05524	4.93145	5.20105	5.1227	5.12517	5.12678	5.00587	5.00823	5.22768	5.86341	5.42768	5.13231	5.15195	5.14839	5.19503	5.13473	4.66257	4.81055	4.7029	4.59252	4.66229	5.43775
GL50803_11190	5.12496	5.05687	5.11532	5.05269	5.09322	4.99467	5.01385	4.86015	5.09358	5.09758	4.40731	5.18836	5.23552	5.31193	5.41376	5.55689	5.69585	5.74843	5.59712	5.78914	5.62485	5.70728	4.50668	5.62837	5.49987	5.49927	5.51586	5.47418	5.63633	5.46176	5.5382	5.66178	5.17937	4.96218	5.46029
GL50803_15364	7.52186	7.28828	7.44986	7.44575	7.37142	7.31779	7.13363	6.97994	6.91498	6.91062	6.57761	7.48795	7.42317	7.33964	7.51352	7.08713	7.09599	6.96904	6.99792	6.97275	7.06819	7.07859	6.40218	7.10801	7.14541	7.27997	7.32855	7.3021	7.11462	7.12881	7.10361	7.285	7.2013	6.63607	7.13733
GL50803_111967	7.10337	7.04858	7.07829	7.0172	6.86782	6.77687	6.68358	6.6672	6.83463	6.82453	6.35569	7.04669	7.09296	7.15117	7.22864	6.99099	7.13311	7.03423	6.91386	7.07311	7.06877	7.01598	6.95923	7.03922	7.18038	7.20554	7.06728	6.91415	6.99799	6.82175	7.03946	7.14061	6.87634	7.10001	7.04391
GL50803_11186	8.11174	8.03659	7.98195	7.88721	7.74325	7.62367	7.58114	7.52237	7.58278	7.5121	8.82176	8.0605	8.22352	8.19002	8.12688	8.00117	7.87453	7.71371	7.60184	7.55568	7.40363	7.25763	7.8062	7.85009	7.96803	8.0042	7.7473	7.58325	7.49918	7.2522	7.33623	7.22977	7.0927	7.31266	7.96155
GL50803_34701	7.17379	7.52107	7.59753	7.43921	7.22829	7.09017	7.0176	6.81485	6.89692	6.90315	6.35417	7.39765	7.42853	7.66668	7.77255	7.26253	7.16666	6.80182	6.74301	6.75336	6.88976	6.71463	6.41961	6.95916	7.40269	7.69537	7.43928	7.30689	6.89923	7.06688	6.6069	6.39308	7.04361	7.06999	7.24101
GL50803_17543	7.28156	7.08682	7.10663	7.03133	7.0413	7.08375	7.07091	7.01341	7.0091	7.00188	8.07195	7.18579	7.58821	7.24799	7.1901	7.40438	7.55499	7.6159	7.53675	7.76372	7.58851	7.63819	7.97862	7.73608	7.40022	7.14194	7.20357	7.26812	7.5411	7.46935	7.54513	7.57899	7.44637	7.60649	7.46681
GL50803_11676	5.55471	5.55805	5.6947	5.9952	6.27258	6.37109	6.40976	6.50187	6.5237	6.51922	4.75916	5.53672	5.67524	5.58334	5.7132	5.92475	6.17343	6.29202	6.44981	6.54077	6.68385	6.71317	5.18433	5.86435	5.93584	5.8826	6.12293	6.35531	6.64108	6.74288	6.66409	6.95178	6.92429	6.13566	5.79766
GL50803_11677	6.24463	6.34439	6.40707	6.41103	6.24036	6.2194	6.08001	5.99316	5.9961	5.94446	4.17924	6.37574	6.58419	6.50223	6.48321	6.63768	6.75035	6.76224	6.87198	6.96948	6.75842	6.69552	4.96432	6.82178	6.74134	6.61576	6.67906	6.75781	6.93706	6.65682	6.61375	6.66997	6.4357	4.98534	6.70315
GL50803_15469	5.96765	6.0921	6.41338	6.84201	7.06996	7.26288	7.3383	7.29824	7.24934	7.05823	4.41898	6.13186	6.19918	6.25578	6.44679	6.42059	6.29084	6.24101	6.47711	6.49453	6.78174	6.57362	5.18942	5.68093	5.96175	6.42822	6.7714	6.95133	6.89166	7.07918	6.89744	6.83238	7.35835	5.52673	6.04691
GL50803_40390	8.2445	8.37671	8.26333	8.36737	8.12539	8.12218	8.10572	8.01224	7.93506	7.78084	6.25672	8.42773	8.26816	8.35352	8.39274	8.03955	7.78867	7.63471	7.65459	7.51851	7.70879	7.51111	7.06691	7.69699	7.99529	8.34846	8.11998	8.08171	7.95612	7.87347	8.05885	7.79686	7.98318	7.18747	8.10699
GL50803_11683	9.38375	9.73685	9.80585	9.82299	10.2169	10.2241	10.3532	10.272	10.4415	10.1712	8.6792	9.55673	9.37394	9.56903	9.54027	9.71779	9.89255	10.081	10.3949	10.2354	10.6574	10.531	9.68672	9.82754	9.95992	9.78357	9.91938	10.2025	10.4292	10.7202	10.6934	10.452	10.6095	8.29515	9.60354
GL50803_11684	8.2989	8.7858	8.92862	8.87089	8.78889	8.67338	8.42796	8.06507	8.08614	7.80738	8.94343	8.52438	8.20248	8.3286	8.5095	7.52085	7.49675	7.24191	7.18333	7.26218	7.28153	7.11223	10.2949	6.97198	7.59959	7.71255	7.43583	7.37552	7.32984	7.28656	7.20774	7.13149	6.96841	10.2016	7.14474
GL50803_15472	6.95393	6.74284	6.60439	6.64255	6.64064	6.68097	6.85093	7.00571	7.03596	7.16873	10.8438	6.94104	6.28902	6.29597	6.29953	6.49562	6.41364	6.60388	6.92975	6.42464	6.61391	7.14511	10.0184	6.64785	6.26114	6.14141	6.12186	6.24083	6.5471	6.73419	6.96056	7.01906	6.81151	9.37972	6.58316
GL50803_15473	5.68477	5.71972	5.9799	6.41	6.63745	6.89323	7.20837	7.38665	7.38842	7.53921	5.9214	5.74081	5.33026	5.49239	5.67935	5.78591	5.69463	5.81463	6.24172	6.36618	6.99812	7.23388	7.18761	4.99917	5.00806	5.386	5.65114	6.45015	6.97006	7.09721	7.32334	7.80262	7.71391	7.60125	5.29305
GL50803_15474	5.22921	4.96862	5.13686	5.13973	4.94119	4.73101	4.90301	4.86539	4.83428	4.94793	2.90991	5.342	5.2727	5.32309	5.09228	5.22514	5.03048	5.39497	5.39636	5.06831	5.17764	5.41726	3.60757	5.16372	5.00156	4.97572	4.72351	4.98873	5.16982	4.99115	5.41819	5.71734	5.51307	4.49167	5.00579
GL50803_11690	-1.16873	-0.161996	-0.86091	1.83355	2.73484	2.91819	3.68329	4.07229	3.84682	4.32122	1.71923	-0.36216	-1.0083	-0.695257	-0.836786	1.82117	1.47992	2.51018	2.73772	2.99426	3.96428	4.45962	3.18647	-0.450842	-0.0410732	0.0500045	1.4544	3.1315	3.693	3.90142	4.18845	5.1136	5.28047	4.67374	-0.513086
GL50803_11692	7.37741	7.66601	7.53401	7.49076	7.54779	7.57963	7.71943	7.66759	7.69188	7.73107	7.43529	7.57882	7.82188	7.90771	7.91053	7.97327	8.0272	8.08427	7.93276	8.14364	8.1692	8.24075	8.27116	8.08583	8.21541	8.12599	8.14812	8.15367	8.02959	8.10342	7.87987	8.12475	8.32142	8.92182	8.12186
GL50803_15475	7.01418	6.97412	6.75425	6.84277	6.77511	6.72364	6.74445	6.73756	6.80057	6.71967	6.95866	6.93065	7.12177	7.20392	7.14534	7.22857	7.25414	7.28421	7.17391	7.34271	7.20935	7.1962	8.18583	7.38561	7.44084	7.2713	7.22367	7.23281	7.38977	7.13542	7.38867	7.56431	7.18318	8.74588	7.46993
GL50803_15476	6.57909	6.68704	6.73016	6.7692	6.8327	6.84528	6.91838	6.89592	6.96951	6.93228	6.46529	6.70468	6.78346	6.77761	6.79315	6.85274	6.86975	7.00895	6.92183	7.06547	7.15356	7.34842	6.95475	6.69637	6.84121	6.79252	6.70717	6.83744	7.04441	7.0943	7.15849	7.73446	7.43442	7.05585	6.74102
GL50803_15477	2.4456	3.155	3.5141	3.74406	3.86112	3.73195	3.66075	3.30618	3.3193	3.41527	2.65744	2.99776	2.95889	2.79459	3.41228	3.33058	3.08963	3.34364	3.20633	3.25988	3.66921	3.68487	2.16195	2.90566	2.79763	3.52871	3.72635	3.5996	3.1218	3.80987	3.1256	3.49102	4.07296	3.4983	2.6227
GL50803_11696	5.14364	5.12611	5.31747	5.29726	5.09322	5.14894	4.85171	4.88877	4.7407	4.64165	5.65393	5.15515	5.05522	4.97971	5.11567	5.14583	5.27646	5.1892	5.26264	5.26599	5.23406	5.17346	5.87293	5.27408	5.07978	5.04067	5.24793	5.34228	5.40558	5.20929	5.22961	5.31467	4.9737	6.12736	5.24032
GL50803_15478	7.36602	7.58225	7.67476	7.69898	7.84661	7.755	7.64029	7.416	7.4017	7.52503	7.11124	7.4867	7.32791	7.45314	7.67466	7.21336	7.2132	7.01504	7.04974	7.13277	7.23927	7.12273	7.57574	6.75367	7.36224	7.56738	7.61087	7.47973	7.34442	7.36867	7.35801	7.48525	7.57586	8.04154	7.14474
GL50803_11700	6.83828	7.03375	7.27357	7.33185	7.57762	7.62913	7.59829	7.6082	7.6834	7.64889	6.50143	6.81977	6.99291	7.09913	7.30183	7.35486	7.55938	7.64009	7.76094	7.76874	7.7242	7.69221	6.30933	7.26802	7.39651	7.52057	7.60437	7.67095	7.75228	7.68342	7.62048	7.67257	7.52545	6.62874	7.20602
GL50803_11701	3.88467	3.98114	4.01717	4.03331	4.32073	4.27506	4.39298	4.62365	4.55407	4.64933	3.63556	3.93555	3.82958	4.11853	4.10731	4.22363	4.04278	4.17562	4.2707	4.21205	4.48191	4.5638	3.73841	4.11257	4.20796	4.38243	4.34472	4.39177	4.31124	4.59561	4.32821	4.76249	4.89406	3.94824	4.1573
GL50803_17546	6.57135	6.59739	6.53772	6.52764	6.56881	6.50331	6.63888	6.54991	6.5388	6.47886	5.4754	6.50741	6.74826	6.692	6.57887	6.65687	6.67153	6.62501	6.65732	6.82444	6.76624	6.73205	5.99138	6.70774	6.82657	6.70864	6.63771	6.69123	6.72342	6.79215	6.76656	6.98611	6.82294	6.23174	6.66061
GL50803_15479	5.75934	5.64196	5.56679	5.50053	5.66111	5.67797	5.72155	5.65889	5.60356	5.61924	4.2265	5.63335	5.83042	5.81168	5.65634	5.75188	5.80098	5.95592	5.88757	5.96794	6.03325	6.05972	5.23938	5.95924	5.89199	5.80993	5.73615	5.82612	5.81687	5.91602	6.00407	6.13846	6.04366	5.04386	5.9073
GL50803_17547	10.5002	10.3229	10.3904	10.4209	10.4325	10.396	10.2516	10.414	10.2991	10.2269	8.82505	10.6236	8.10406	9.37467	9.26211	9.05214	8.67401	9.01085	10.0579	8.08015	9.37953	10.1451	9.60714	9.26491	8.66617	9.52057	9.87654	9.10087	9.39539	9.91163	10.2169	10.123	10.111	8.21612	9.6845
GL50803_39483	7.85827	7.6344	7.67002	7.58272	7.24042	7.1621	6.91124	6.80327	6.73781	6.57738	7.63428	7.57529	8.19014	8.02022	7.87422	8.14698	8.21953	8.25059	8.18392	8.1785	8.11792	8.04706	7.59218	8.15787	7.76003	7.58031	7.38676	7.4393	7.51063	7.20086	7.65109	7.63548	7.31494	7.57859	7.7674
GL50803_111950	9.25396	9.47839	9.54568	9.51405	9.43883	9.37958	9.25762	9.18099	9.09739	9.13211	8.48673	9.25258	8.53161	8.86335	8.984	8.23744	8.12327	7.72354	7.93046	7.86599	8.301	8.19124	8.63022	8.05499	8.49717	8.77661	8.64425	8.51183	8.26481	8.5867	8.36953	8.21258	8.74092	8.86052	8.17413
GL50803_17549	7.69333	7.99379	7.78361	7.57677	7.57221	7.52092	7.3738	7.19888	7.04973	6.99788	6.77898	7.67129	7.05238	7.29926	7.20999	7.17298	6.98304	7.12195	7.32826	7.00184	7.17347	7.39745	6.85092	7.24432	7.53539	7.39844	7.45509	7.17425	7.25239	7.39765	7.47955	7.58647	7.49719	6.82633	7.1312
GL50803_9237	7.11525	7.27257	7.16095	7.18188	7.26749	7.20467	7.20301	6.9751	7.08721	7.06207	8.3981	7.18836	7.28897	7.47414	7.44173	7.13925	7.03385	6.99894	6.92646	6.83286	7.09326	6.95053	7.40348	7.17609	7.45677	7.58498	7.3155	7.32069	7.1066	7.16897	7.29253	7.13041	7.16982	7.33086	7.2006
GL50803_9238	7.01482	6.98894	6.96071	6.96698	6.99658	6.87919	6.95473	6.85694	6.99985	6.97312	6.5619	7.06246	7.28078	7.19129	7.26475	7.18908	7.16754	7.08087	6.95327	7.11069	6.81979	6.953	6.39338	7.0892	7.2474	7.19437	7.05724	7.02644	6.96563	6.91258	6.86911	6.86705	6.79999	6.45384	7.15255
GL50803_9239	4.73618	4.80642	5.06485	4.8306	4.96173	4.8977	5.02492	5.00029	5.1379	5.18291	4.56795	4.91337	5.13815	5.07517	4.98092	5.04535	5.19036	5.16552	5.01701	5.09855	4.96196	4.95353	3.84552	4.96834	5.05068	5.027	5.03694	5.12516	4.86424	5.08005	4.60602	4.69709	4.89647	4.24539	5.0658
GL50803_115742	5.72254	5.73509	5.62891	5.64929	5.84096	5.83244	5.91962	5.82966	5.74573	5.81736	5.46699	6.30178	5.24677	5.69345	5.53068	5.55543	5.50344	5.65657	5.76153	5.62849	5.93203	6.17988	6.40655	6.1091	5.95392	5.81126	6.05275	6.00418	6.04187	6.18831	6.39434	6.66552	6.62823	6.93617	5.82505
GL50803_50100	3.27118	3.46621	2.93098	3.25917	3.37872	3.47988	3.68329	3.73091	3.71471	3.84771	3.74162	3.82901	3.27696	3.13558	3.02905	3.10952	2.91537	3.1878	3.0406	3.56142	3.49544	3.43129	4.19857	3.32962	3.2926	3.0316	3.13576	3.39888	3.62158	3.38417	3.71506	4.18996	3.77119	4.28325	3.24568
GL50803_15013	4.02226	4.42951	4.58569	4.73846	5.04109	5.07325	5.41488	5.58608	5.2596	5.58629	5.30973	4.15304	4.21677	4.33235	4.52759	4.50665	4.56156	4.50614	4.59689	4.80046	5.21342	5.20914	5.54768	4.32564	4.39818	4.57014	4.81114	4.96711	4.72963	5.3877	4.9404	5.19824	5.7323	5.46547	4.33547
GL50803_9668	4.75149	5.00203	5.07125	5.33897	5.58866	5.82147	5.87504	6.02984	5.96959	5.90333	6.2502	4.63787	4.64026	4.74553	4.72575	4.91928	5.06315	5.22782	5.72101	5.46015	5.59962	5.77606	6.12761	4.71601	4.91194	4.97096	5.20813	5.18049	5.73854	5.72998	5.95639	6.11252	5.88429	5.61548	4.62944
GL50803_23630	4.22445	4.44828	5.14599	5.73072	6.18575	6.4821	6.62585	6.77079	6.78418	6.72694	5.14027	4.47917	4.59401	4.34335	4.97628	5.12037	5.16934	5.30752	5.78792	5.84966	6.1713	6.0666	5.49929	4.24709	4.64898	4.95179	5.55605	5.78963	6.04292	6.36676	6.36218	6.52265	6.70642	5.53616	4.52909
GL50803_9665	3.92302	4.43329	4.99243	5.44531	6.04123	6.29698	6.55047	6.63608	6.59481	6.55644	4.95226	3.95498	4.23572	4.3615	4.86274	4.93509	5.0839	5.09623	5.49756	5.59777	6.01189	5.94615	4.83381	4.18331	4.50317	4.8699	5.50276	5.65335	5.74243	6.16725	5.96069	6.21562	6.5789	5.3164	4.07939
GL50803_137706	6.60964	6.59655	6.69947	6.8519	6.97969	7.073	7.06824	6.95862	7.02635	7.14087	5.50582	6.74151	6.71082	6.67976	6.79117	6.84737	6.78301	6.81393	6.81822	6.8962	7.17614	7.18992	6.24964	6.60698	6.62419	6.92377	7.02724	7.09782	7.08327	7.28444	7.25842	7.51566	7.67974	6.86305	6.79244
GL50803_101994	7.50886	7.61127	7.64715	7.70319	7.72309	7.76325	7.70711	7.69658	7.66837	7.60187	6.38277	7.73695	7.52798	7.60595	7.65411	7.6534	7.66236	7.56703	7.58186	7.64683	7.7563	7.75426	7.21159	7.64084	7.62202	7.77183	7.93912	7.86011	7.91536	7.95506	7.93585	8.08945	8.06701	7.46045	7.7247
GL50803_9662	6.31018	6.00351	6.25638	6.32843	6.22876	6.39152	6.33611	6.50187	6.4239	6.42249	6.21716	6.29322	6.03685	6.20845	6.13448	6.54577	6.53162	7.09504	6.98403	6.27645	6.78034	7.06433	7.12255	6.38066	6.20377	6.45825	6.3094	6.5318	6.67676	6.54201	6.94653	7.17234	6.91482	6.65352	6.35867
GL50803_15011	7.75765	7.84664	7.83063	7.69349	7.54055	7.42655	7.36163	7.07698	7.19173	6.9531	6.52592	7.82473	7.76398	7.96343	7.75674	7.79072	7.60675	7.61007	7.68143	7.30949	7.25147	7.26562	7.68163	7.75878	7.85235	7.79387	7.61278	7.56217	7.50492	7.45393	7.4818	7.41625	7.2416	7.56328	7.90441
GL50803_9659	5.24444	5.29115	5.42642	5.48301	5.32096	5.28723	5.10639	5.061	4.93819	5.09758	4.01975	5.34385	5.59385	5.55681	5.64615	5.6057	5.71291	5.60027	5.63477	5.59353	5.61387	5.60227	4.4985	5.45653	5.56746	5.56856	5.53368	5.66683	5.61809	5.55776	5.32614	5.73018	5.74571	6.08082	5.44906
GL50803_9658	6.99051	6.77887	6.70463	6.75629	6.86646	7.01253	7.35199	7.61054	7.81611	7.91717	8.57643	6.81246	7.10641	6.90184	6.81344	6.87633	6.96942	7.17529	7.15094	7.39644	7.50393	7.62232	7.92773	7.25895	6.88603	6.73901	6.72421	6.89392	7.25829	7.32138	7.47843	7.55391	7.49957	7.53767	7.04018
GL50803_23634	6.20849	6.39073	6.52727	6.63023	6.77873	6.98493	7.58376	7.8769	7.92962	8.12918	8.59391	6.15094	6.28448	6.44381	6.53932	6.3708	6.36977	6.43341	6.68411	7.0029	7.53337	7.88133	8.5533	5.99792	6.29698	6.4608	6.41107	6.79919	7.09802	7.51825	7.43463	8.04872	8.29317	8.46785	6.10348
GL50803_93601	6.18501	6.27669	6.37506	6.60435	6.80313	6.9521	7.22478	7.36273	7.44725	7.45412	5.59598	6.40694	6.47278	6.2741	6.38514	6.75495	6.87463	7.02329	7.11895	7.22246	7.37789	7.48909	6.39998	6.78181	6.64797	6.7193	6.88745	7.07217	7.25057	7.37147	7.34613	7.63776	7.52156	6.55945	6.70669
GL50803_4558	7.03622	6.89766	6.39435	6.85568	6.70221	7.05062	7.30689	7.75817	7.52857	7.60088	8.89515	7.12222	7.46874	6.77896	6.42057	7.2418	7.09831	7.27271	7.30052	7.2965	7.3899	7.5357	9.31089	7.50051	7.06766	6.90271	6.69858	7.17215	7.51822	7.28274	7.63368	7.86026	7.69018	8.15566	7.33126
GL50803_13653	4.95821	4.9503	4.99917	5.08916	5.25384	5.35678	5.77892	6.10827	6.09343	6.37544	7.46515	5.14037	5.21465	5.00533	4.96461	5.38005	5.48371	5.55542	5.64603	5.82335	5.93329	6.21023	7.28835	5.44378	5.30418	5.1158	5.27322	5.64278	5.75916	5.96034	5.9873	6.45029	6.45867	6.89519	5.32103
GL50803_13652	4.35443	4.04665	4.0238	4.39147	4.27632	4.4101	4.90541	5.11925	5.2095	5.4479	5.9214	4.28557	4.5062	4.0927	4.17769	4.5336	4.56156	4.67778	4.69313	4.86521	5.03436	5.25404	5.17922	4.55933	4.19282	4.14986	4.09267	4.56491	4.45724	4.7415	4.93166	5.41534	5.2145	4.61557	4.42124
GL50803_4554	5.07474	5.13077	5.16409	5.24971	5.07919	5.07817	5.25483	5.37054	5.34458	5.43612	6.21548	5.12544	5.3373	5.33232	5.42572	5.46497	5.57448	5.50127	5.29367	5.42717	5.48374	5.58321	6.45387	5.39989	5.4078	5.52382	5.37738	5.52275	5.37584	5.44968	5.29922	5.47424	5.55022	6.41002	5.41342
GL50803_50101	6.43676	6.25766	6.22369	6.30425	6.65017	6.69025	6.78604	6.88562	6.71671	6.96186	6.3219	5.9646	4.79138	5.21746	5.13661	5.18603	4.82847	5.32187	5.48507	5.16102	5.70244	6.1249	6.23247	6.21138	6.10815	6.10174	6.20206	6.19092	6.20486	6.53631	6.55236	6.77911	6.85855	7.61245	5.55624
GL50803_50102	3.68233	3.67821	3.71566	3.80798	3.84463	3.6615	3.69996	3.66022	3.88041	3.8872	3.1389	3.75335	3.94923	3.63655	3.64636	3.86177	3.87544	4.03023	4.06063	4.38558	4.22572	4.21318	4.10466	4.14444	3.75625	3.64667	3.82438	3.96705	4.08077	4.01237	4.32153	4.56944	4.14758	3.98547	3.85968
GL50803_4263	5.78188	6.03365	6.07701	6.12511	6.02546	5.93714	5.92554	5.76656	5.71548	5.81281	4.59907	5.745	6.03901	6.22241	6.18259	6.24505	6.31018	6.32	6.16099	6.35202	6.23822	6.21952	5.08399	6.18768	6.44968	6.41341	6.32809	6.38641	6.1187	6.17461	5.91042	5.91535	6.16438	5.64195	6.16821
GL50803_4264	5.55297	5.60397	5.54854	5.54247	5.22863	5.17905	5.13937	4.72526	4.88953	4.87996	4.85249	5.59051	5.68631	5.88752	5.70621	5.95165	5.88399	5.96738	5.6588	5.71821	5.48028	5.46144	5.28291	5.93097	6.0176	6.01434	5.82172	5.71375	5.80204	5.51491	5.58911	5.56469	5.23746	5.14191	5.9226
GL50803_4266	8.18375	8.48293	8.36949	8.25747	8.017	7.89015	7.79768	7.60506	7.58606	7.43648	6.05644	8.3288	8.43201	8.73561	8.74826	8.28691	8.20174	7.9798	7.85201	7.84028	7.74196	7.67617	6.47696	8.05026	8.66959	8.71291	8.32204	8.11786	7.94801	7.6672	7.61128	7.50739	7.52234	6.68639	8.35016
GL50803_15944	5.11079	4.90754	4.94787	4.89384	4.93341	5.00117	5.23399	5.17736	5.2974	5.28006	3.74162	5.09292	5.33026	4.92951	4.93384	5.31248	5.45359	5.55997	5.61197	6.04346	5.7859	5.79414	4.42269	5.70784	5.13627	4.99925	5.00478	5.15096	5.53531	5.54077	5.43375	5.54058	5.47654	4.09171	5.1287
GL50803_24321	8.77445	8.61546	8.45862	8.2799	8.13418	7.86561	8.02752	8.10054	8.20691	8.15367	7.31941	8.99557	8.97563	8.96728	8.76045	9.00074	8.79678	8.85688	8.59856	8.40912	8.37116	8.32805	8.00918	9.33002	8.91811	8.92975	8.68704	8.58424	8.36556	8.19267	8.29674	8.20186	8.04738	7.09256	9.2804
GL50803_41467	6.11928	6.4186	6.35156	6.37138	6.33098	6.26601	6.31552	6.08147	6.13279	6.19491	5.30029	6.27208	6.22502	6.34877	6.39125	6.39713	6.32373	6.14033	6.19207	6.17699	6.18302	6.07458	5.32978	6.18768	6.42964	6.5764	6.67761	6.55292	6.41035	6.45176	6.18504	6.33071	6.48129	5.91707	6.2935
GL50803_33862	9.59828	9.5595	9.60387	9.48293	9.17943	9.02615	8.89183	8.7194	8.8041	8.65569	9.1396	9.60394	9.64945	9.78283	9.7187	9.85465	9.82972	9.95877	9.80157	9.75428	9.43986	9.52525	8.88057	9.70724	9.53835	9.52311	9.22716	9.36845	9.38516	9.17818	9.42301	9.53787	9.10182	8.1382	9.58195
GL50803_16791	6.18501	6.32928	6.42968	6.34684	6.38616	6.34681	6.29005	6.36132	6.47034	6.48317	5.5516	6.21882	6.38298	6.35693	6.40598	6.478	6.6221	6.54926	6.59971	6.62767	6.4347	6.34274	5.23446	6.44686	6.74653	6.59352	6.62265	6.65562	6.70028	6.54981	6.52065	6.50032	6.38861	5.43215	6.50606
GL50803_14768	7.0468	7.2063	7.19068	7.1933	7.36372	7.39359	7.382	7.45697	7.61343	7.59493	6.96166	7.17081	7.35849	7.25432	7.31107	7.3536	7.53527	7.59056	7.54623	7.58481	7.60683	7.65958	6.8921	7.45198	7.71503	7.54356	7.57181	7.61604	7.69187	7.64386	7.60476	7.75801	7.6526	6.85427	7.52441
GL50803_8722	8.87255	10.9797	11.3263	11.4648	11.816	11.8898	11.8494	11.7705	11.7195	11.5042	9.71289	8.88342	8.34958	10.2367	10.3693	10.0549	10.0743	9.99203	10.3646	10.1008	10.4159	10.1004	9.19952	8.16687	10.1776	10.6395	10.5896	10.5665	10.5391	10.7036	10.7295	10.6639	10.7503	8.87113	8.19086
GL50803_8725	7.42972	7.31409	7.52995	7.62104	7.79246	7.81377	7.93254	7.88628	7.87711	7.74606	8.56892	7.77844	7.56217	7.38025	7.62626	8.00063	8.17055	8.28671	8.18723	8.2708	8.05057	8.02338	8.07395	7.88057	7.43039	7.48392	7.74069	7.89552	8.04016	8.15224	8.11807	8.08557	7.94184	7.9134	7.7515
GL50803_8726	9.73853	9.66245	9.64431	9.56766	8.98398	8.89159	8.50153	8.22055	8.11238	7.9068	10.1667	9.90239	9.63086	9.47611	9.60189	9.00637	8.89424	8.52944	8.33353	8.16166	8.05174	7.80177	8.15362	8.97289	9.04262	9.18516	9.15873	8.69417	8.48529	8.23574	8.36	7.8764	7.9433	8.03767	9.31674
GL50803_8727	8.49077	8.4355	8.39301	8.31525	8.08792	8.04094	7.83181	7.66722	7.59439	7.54814	9.07283	8.63373	8.46872	8.30489	8.43624	7.90552	7.78464	7.55607	7.36573	7.4017	7.43651	7.26463	7.48547	7.65819	7.93002	7.99134	7.89217	7.68573	7.54185	7.50335	7.57104	7.40738	7.50431	7.22783	8.04428
GL50803_33863	5.63282	5.5615	5.56679	5.59778	5.75971	5.69971	5.76446	5.67092	5.72475	5.74994	7.32485	5.4892	5.51692	5.55208	5.61516	5.55543	5.61002	5.55238	5.52223	5.68139	5.65578	5.60069	7.48857	5.23576	5.46878	5.5075	5.57807	5.59502	5.68968	5.65699	5.75808	5.76944	5.6927	7.62356	5.59748
GL50803_8731	6.38863	6.41478	6.30476	6.49693	6.88808	6.98591	7.60531	8.07869	8.15663	8.30915	9.9067	6.49585	6.49261	6.42581	6.40426	6.74281	6.79106	6.89297	6.96937	6.87772	7.24894	7.26512	8.76764	6.89679	6.63473	6.5222	6.68342	6.85324	6.97392	7.28487	7.21496	7.37229	7.48446	8.22198	6.82861
GL50803_8733	7.23659	7.32378	7.34471	7.37153	7.58963	7.69334	8.03985	8.35344	8.45142	8.59901	9.71348	7.342	7.32304	7.43911	7.44047	7.49289	7.53184	7.56439	7.58061	7.67319	7.76661	7.65617	8.72926	7.58568	7.56583	7.46883	7.55683	7.5058	7.63581	7.74094	7.74076	7.84097	7.86007	8.66931	7.53838
GL50803_28620	5.31206	4.96602	5.09031	5.07364	4.79431	4.86672	4.76984	4.60182	4.50261	4.48746	6.0527	5.342	5.24116	4.85205	5.0175	5.1632	5.08577	5.08365	5.0777	5.18939	5.0414	4.84565	6.2151	5.29376	4.78645	4.86734	4.94065	4.74511	5.21531	4.86718	5.14707	5.04897	4.65921	5.86808	5.19905
GL50803_16792	6.21181	6.15857	6.05939	6.19013	6.54604	6.45963	6.79059	6.98357	7.19602	7.39447	6.37978	6.50659	6.14908	6.17498	6.14382	6.3708	6.38733	6.55079	6.40694	6.69914	6.76127	6.81612	5.82793	6.39481	6.4718	6.00041	6.29713	6.46051	6.58442	6.76803	6.8131	6.96814	7.01123	5.63025	6.47459
GL50803_8738	5.14132	5.23821	5.38073	5.36683	5.41892	5.44331	5.5297	5.50099	5.59635	5.66413	4.97616	5.30273	5.28549	5.34514	5.46267	5.36678	5.23152	5.31651	5.32605	5.36385	5.50767	5.25203	4.19857	5.40648	5.49679	5.38242	5.43713	5.51283	5.39409	5.60482	5.29241	5.30897	5.72148	4.59765	5.39453
GL50803_16793	7.37296	7.37176	7.41943	7.38574	7.06345	6.92297	6.69194	6.39799	6.36325	6.19578	6.79362	7.45037	7.06515	7.05298	7.17246	6.66163	6.56956	6.24572	6.25334	6.17699	6.13004	5.99986	5.80156	6.48314	6.82657	6.86861	6.83615	6.57055	6.32386	6.23569	6.12209	5.96693	6.05878	5.71857	6.70728
GL50803_1649	6.49338	6.19236	6.26898	6.10234	6.03518	6.04296	5.84912	6.01221	6.04453	6.08694	11.6892	6.39543	6.4863	6.42668	6.42908	6.55018	6.60914	6.93909	6.60054	6.62698	6.26955	6.42357	10.486	6.693	6.32155	6.19844	5.92845	6.12952	6.40136	6.08274	6.51115	6.32977	6.14529	9.76172	6.46487
GL50803_12741	6.41385	6.27564	6.1605	6.25693	6.72567	7.0077	7.13414	7.51154	7.48361	7.56345	12.109	6.44351	6.50673	6.14281	6.14071	6.50625	6.81665	6.90315	7.05156	7.11956	7.11569	7.17831	11.4469	6.92974	6.51201	6.30521	6.30752	6.73098	7.14678	7.05845	7.16409	7.01265	6.97583	10.7907	6.53023
GL50803_16794	5.40209	5.6614	5.63757	5.65452	6.03518	6.14095	6.45302	6.93199	6.92191	7.12352	10.6737	5.59051	5.69181	5.47249	5.70201	5.85284	5.94197	6.03101	6.20953	6.32585	6.36248	6.42714	9.22857	6.00553	5.86836	5.7022	5.77889	6.07553	6.13556	6.19103	6.18504	6.1838	6.29779	8.48298	5.81852
GL50803_16795	8.13877	8.29637	8.12546	8.06551	7.97499	7.92952	7.892	7.94414	7.99735	8.06677	11.6658	8.11279	7.38633	7.60023	7.38424	7.3213	7.21192	7.37992	7.41031	7.2537	7.36016	7.57645	9.78398	7.38186	7.39651	7.3544	7.30091	7.22017	7.33199	7.4577	7.54727	7.71412	7.59673	9.46826	7.26881
GL50803_3706	7.30665	7.42152	7.42943	7.59001	7.59622	7.77087	7.86021	7.87722	7.90885	7.89635	9.38436	7.42968	7.65485	7.48038	7.57233	7.83624	7.90745	7.96072	8.01327	8.1254	8.06936	8.05458	8.42964	7.87286	7.85054	7.73305	7.90156	8.02963	8.13001	8.09254	8.08471	8.21665	8.01619	8.07646	7.8764
GL50803_3705	6.33376	6.5036	6.56974	6.66516	6.77656	6.88553	6.92076	6.98658	6.94647	6.91699	5.9111	6.42534	6.44455	6.47748	6.60013	6.71036	6.79564	6.82971	7.09213	7.15979	7.18518	7.17937	6.0927	6.68015	6.75622	6.72001	6.96293	7.06766	7.14922	7.10156	7.19547	7.27529	7.211	5.9074	6.69723
GL50803_16796	5.61117	5.3896	5.40122	5.57591	5.71806	5.81115	5.85905	6.10717	6.04347	6.15412	6.73413	5.34936	5.60118	5.45062	5.40688	5.63088	5.73692	6.00345	6.05992	6.12309	6.31676	6.44925	6.27141	5.83291	5.59939	5.55909	5.59669	5.88111	6.08335	6.24795	6.2594	6.4399	6.67383	6.37363	5.61767
GL50803_112295	6.3307	6.5728	6.57989	7.80539	8.33255	8.60805	8.84996	9.07544	9.05323	9.22	8.00576	6.47833	5.99742	6.37402	6.41458	7.15235	7.12813	7.32041	8.04614	8.04849	8.69342	8.89413	8.28669	5.92065	6.16162	6.35532	7.33319	8.29151	8.56451	9.01763	8.97344	9.19441	9.67526	8.75163	6.03664
GL50803_92892	5.11553	5.22955	5.20544	5.91619	6.31311	6.55767	6.65749	7.03103	7.00312	7.03156	5.43573	5.03932	4.10165	4.57561	4.51805	4.82302	4.87683	5.04956	5.91975	5.24272	5.90138	6.26809	5.92576	4.56229	4.58083	4.71078	5.32065	5.70362	6.1127	6.37956	6.78729	6.62251	6.67663	6.00126	4.72791
GL50803_7685	6.70313	6.48008	6.65004	6.71187	7.11708	7.19393	7.5061	7.7105	7.88096	7.97023	6.9365	6.64761	6.6062	6.32307	6.39038	6.73315	6.77085	6.9315	7.10444	7.20496	7.46473	7.55744	6.95625	6.84802	6.46394	6.31368	6.58508	6.86822	7.1404	7.27591	7.41713	7.69021	7.49402	6.68215	6.70728
GL50803_41451	6.68092	6.65104	6.81944	7.01856	7.24933	7.42969	7.6134	7.73757	7.76884	7.76473	8.31348	6.7345	6.87456	6.91542	6.99466	7.19049	7.35535	7.3683	7.49863	7.58907	7.82798	7.84544	8.11199	7.33817	6.88308	7.10878	7.26935	7.62796	7.7497	7.94595	7.86933	7.80734	8.18709	8.65998	7.15298
GL50803_24584	5.61117	5.73203	5.4995	5.5667	5.63256	5.5676	5.78674	5.8012	6.19609	6.00455	7.43959	5.61515	5.7109	5.86226	5.87145	5.74164	5.77802	5.8197	5.81527	5.83297	6.23822	6.45974	7.60843	5.71316	5.83461	5.93235	5.61507	5.74656	5.78705	5.6504	5.87894	5.9166	5.85366	7.50839	5.74701
GL50803_114535	5.95316	6.05094	6.2005	6.41103	6.41996	6.50652	6.33077	6.23123	6.3968	6.172	6.43831	5.94772	6.30077	6.17292	6.39386	6.47491	6.60197	6.35967	6.5839	6.62004	6.58608	6.50857	5.9972	6.25583	6.35254	6.40197	6.47954	6.69708	6.75136	6.68092	6.58338	6.60866	6.58264	6.39281	6.34889
GL50803_101877	5.42327	5.61065	5.69677	5.74058	5.65639	5.60988	5.57409	5.44952	5.49621	5.59956	4.53078	5.5874	5.70819	5.80241	5.85891	5.73003	5.78495	5.49178	5.4228	5.3869	5.3727	5.38276	4.71171	5.54277	5.82114	5.91761	5.85947	5.9635	5.64605	5.54645	5.29582	5.19412	5.33471	5.50125	5.84231
GL50803_25713	3.83955	3.85741	3.77181	3.48716	3.94089	3.79614	4.08557	4.58919	4.46198	4.93752	3.27357	3.81844	3.93539	3.93683	4.05107	4.17119	3.99578	4.13961	4.02162	3.88197	4.08737	3.89017	3.76594	3.90961	4.06976	4.17074	3.99781	4.09662	3.68763	3.68659	3.77003	3.55019	4.00323	4.01277	4.07574
GL50803_32419	8.21913	8.11504	8.29652	8.15272	7.89848	7.83593	8.01563	8.49281	8.73479	9.21849	9.89917	8.15436	8.57783	8.35466	8.36861	8.33729	8.35257	8.34673	8.18088	8.19958	8.21561	8.28642	10.3537	8.24083	7.91712	8.05758	8.09945	8.22626	8.09672	7.87347	7.87047	7.85407	7.63397	10.2144	8.33899
GL50803_17524	5.03776	5.06905	5.2513	5.21711	5.49312	5.62678	5.86522	6.08934	6.17304	6.274	6.27128	4.99777	5.27453	5.18726	5.23308	5.4143	5.58642	5.80189	5.89433	6.10135	6.10896	6.02363	6.22505	5.48481	5.28824	5.32398	5.34655	5.62141	5.9473	5.99296	5.88913	6.00737	5.94367	5.63025	5.28361
GL50803_21498	7.14453	7.13685	7.2104	7.21055	7.26025	7.25475	7.33029	7.4151	7.44805	7.40169	6.93853	7.19501	7.36022	7.25529	7.37414	6.93816	6.90833	6.86934	6.97449	7.02773	7.16382	7.13805	6.8315	6.67675	6.8629	7.0654	6.87098	6.98758	6.94045	7.16574	6.99348	7.25568	7.13509	6.15212	6.83401
GL50803_32686	6.91164	7.02502	7.10273	7.16367	7.23621	7.26396	7.22574	7.09719	7.22946	7.01976	7.39449	6.99542	7.08043	7.07294	7.04813	7.24134	7.43789	7.62135	7.61008	7.86159	7.5981	7.73279	6.92147	7.5253	7.22618	7.14194	7.19342	7.4588	7.67873	7.66231	7.63166	7.85179	7.49918	6.82889	7.01946
GL50803_6679	8.24747	7.64989	7.63315	7.63344	7.46522	7.30603	7.04505	6.85496	6.87566	6.59471	7.06277	8.20519	8.46651	7.70236	7.49012	7.90179	8.0162	8.17181	7.99482	7.96861	7.54292	7.48994	8.65021	8.67104	7.77726	7.44374	7.6143	7.58956	7.7869	7.45393	7.56928	7.48693	7.08005	9.1643	8.35148
GL50803_6680	7.1868	7.25402	7.23058	7.15878	7.1499	7.04214	7.19666	7.24641	7.39881	7.32308	6.82248	7.33136	7.42399	7.41846	7.3175	7.51146	7.44957	7.58165	7.35351	7.33299	7.16972	7.19411	6.3689	7.52152	7.3903	7.24397	7.19086	7.16426	7.26417	7.1968	7.22662	6.98074	6.98772	5.93621	7.43552
GL50803_14275	6.93797	6.81475	6.60328	6.64955	6.80526	6.85069	7.06234	7.19368	7.29142	7.33978	9.19114	6.86669	6.97328	6.83003	6.77189	6.78455	6.83011	6.92858	6.91984	7.18678	7.18358	7.3699	9.20267	6.93658	6.75493	6.54156	6.44143	6.54402	6.70693	6.9586	6.95895	7.0643	6.95808	9.44172	6.79021
GL50803_17527	7.37692	7.60417	7.71009	7.59228	7.46522	7.41029	7.30825	7.07075	7.15544	7.02813	6.4793	7.5339	7.59153	7.65753	7.7842	7.33413	7.31763	7.17034	7.07854	7.10772	7.16489	7.18254	6.41961	7.12908	7.478	7.64553	7.42806	7.29199	6.98436	7.17998	6.8651	6.75835	7.16982	6.83273	7.31744
GL50803_6685	5.89783	5.66942	5.82741	5.81403	5.82002	5.76072	5.63172	5.49762	5.59346	5.56751	4.18609	6.00361	6.1768	5.92949	5.95516	5.91567	5.96858	5.99452	5.96415	6.02048	5.91806	5.89294	4.8912	6.11916	5.87074	5.89896	5.80314	5.92414	5.9529	5.90942	5.87439	6.18068	6.00961	4.98073	6.16564
GL50803_6686	6.32048	6.34238	6.21359	6.17081	6.59288	6.74354	7.3467	7.74043	7.84039	7.75735	7.15726	6.12865	5.15617	5.57247	5.55733	5.60428	5.42873	5.62508	6.25123	5.43825	6.10673	6.82696	7.41548	5.64239	5.48907	5.77627	5.9112	5.65486	5.85809	6.43806	6.50232	6.41004	6.83554	6.26618	5.81087
GL50803_6687	12.9593	12.7586	12.8962	12.9848	13.1251	13.1354	13.1418	13.1414	13.2101	12.9979	11.4404	12.8921	12.0328	12.1709	12.2165	12.1059	12.1236	12.3132	12.8623	11.9749	12.5335	12.7239	12.5373	12.1781	11.8882	12.1059	12.2524	12.0909	12.2335	12.4503	12.5733	12.3316	12.2914	10.6932	12.1209
GL50803_6691	5.12731	5.17426	5.00921	5.03409	5.20298	5.17676	5.13733	5.03795	5.04996	4.7669	4.44204	5.34569	5.20507	5.05969	4.95522	5.30901	5.51182	5.68876	5.57708	5.86264	5.65578	5.82152	5.06195	5.61421	5.3077	5.00158	5.02095	5.13812	5.3214	5.29789	5.55963	5.6942	5.35409	4.84048	5.39453
GL50803_21502	5.77889	5.89002	5.80259	5.79838	5.45015	5.38686	5.12091	4.94932	5.12795	4.99488	5.51943	5.89085	6.07313	6.10991	5.96339	6.08924	6.09011	5.99115	5.97185	6.01732	5.74334	5.63813	4.90364	6.21326	6.19714	6.07208	6.02782	5.97679	5.96959	5.61838	5.61254	5.53733	5.30603	4.59765	6.06907
GL50803_17529	6.52668	6.63883	6.62304	6.58624	6.29905	6.25192	6.08531	5.78467	6.02963	5.73197	7.0995	6.55832	6.71556	6.75925	6.74419	6.84079	6.85611	6.81457	6.75941	6.72003	6.47601	6.50097	6.2374	6.86187	6.87717	6.74041	6.6993	6.75711	6.72539	6.28327	6.56866	6.44856	6.14326	5.95978	6.73872
GL50803_3158	6.19288	6.00731	6.34232	6.27061	6.29096	6.47418	6.35554	6.33604	6.31141	6.04778	5.9797	6.33275	6.28266	5.99488	6.1572	6.25138	6.3481	6.47895	6.59889	6.5806	6.45154	6.43426	5.57906	6.13213	5.88376	5.92991	6.13253	6.15205	6.4819	6.36274	6.49344	6.50282	6.23548	5.04386	6.07273
GL50803_3157	5.06252	5.17651	5.17899	5.16436	4.85322	4.72945	4.55143	4.50092	4.59511	4.51293	6.6733	5.22483	5.3143	5.45232	5.50837	5.30206	5.47516	5.29484	5.14958	5.12033	5.13876	5.09487	6.09541	5.51256	5.70321	5.75015	5.46611	5.37367	5.23753	4.84198	5.03524	4.92281	4.79179	7.01592	5.67056
GL50803_3154	5.21162	5.13077	5.0966	4.89384	4.87504	4.68816	4.60848	4.31786	4.58059	4.49316	5.4557	5.30083	5.51226	5.31007	5.29958	5.52292	5.54485	5.68599	5.60703	5.80757	5.43999	5.41007	5.56346	5.60851	5.16758	5.09411	4.90624	5.02639	5.03042	4.88748	5.17511	5.1523	4.84009	4.75143	5.45188
GL50803_17530	5.53539	5.67899	5.63757	5.59234	5.4718	5.49579	5.623	5.64064	5.68321	5.86648	6.16439	5.95257	5.33554	5.6275	5.49383	5.17085	4.95468	4.79044	4.75391	4.78814	4.91159	4.54422	6.06249	5.32364	5.2649	5.481	5.18781	5.14455	4.98736	5.08005	4.8894	4.67067	5.02958	6.65641	5.54968
GL50803_17531	6.64203	6.48099	6.49428	6.56881	6.31111	6.23547	6.18244	6.28409	6.25307	6.23542	7.92057	6.80913	6.52841	6.38913	6.57504	6.17829	6.10125	5.85096	5.85465	5.58073	5.73901	5.47874	7.28598	6.30248	6.2438	6.27468	6.18678	6.07553	6.22168	6.0054	6.01135	5.68397	5.52244	7.15924	6.53156
GL50803_7896	6.31431	6.44219	6.44085	6.38821	6.33492	6.28637	6.28085	6.26933	6.37002	6.22946	6.76647	6.40958	6.65771	6.61921	6.45348	6.81539	6.92724	7.08666	7.07794	7.18349	6.82796	6.86101	6.81017	6.79504	6.55112	6.47765	6.35112	6.58561	6.85261	6.63964	6.68829	6.73233	6.51769	6.01032	6.45087
GL50803_7893	4.58378	4.77703	4.61229	4.46866	4.58185	4.5046	4.63762	4.58601	4.60949	4.69702	7.8141	4.80779	4.78882	4.65132	4.67227	4.67752	4.58027	4.73521	4.55993	4.75815	4.66027	4.62413	7.32583	4.94138	5.11634	4.83631	4.8138	4.78959	4.74522	4.77578	4.60876	4.56307	4.70934	6.78865	4.84812
GL50803_17532	6.6873	6.68467	6.51087	6.45662	6.2633	6.26925	6.15549	6.10273	6.16916	6.14148	6.63127	6.77674	6.5437	6.60176	6.42142	6.41415	6.30537	6.24007	6.18326	5.99713	6.05777	6.03537	6.08725	6.45483	6.57102	6.50504	6.46779	6.25775	6.25927	6.17644	6.25852	6.27041	6.00961	6.24906	6.61677
GL50803_7891	6.18951	6.28611	6.24226	6.14752	5.92705	5.88046	5.60982	5.38157	5.60643	5.62574	8.65287	6.32063	6.57603	6.40672	6.47254	6.6872	6.79793	6.71884	6.59723	6.5532	6.21245	6.2551	7.85748	6.69569	6.61782	6.51813	6.5465	6.60207	6.59665	6.20007	6.26202	6.05694	5.77215	7.71644	6.72716
GL50803_7890	6.30396	6.30064	6.43838	6.42537	6.2351	6.17813	5.93848	5.73395	5.8094	5.7089	5.97575	6.37303	6.50204	6.47997	6.59862	6.26664	6.28271	6.04946	6.03075	6.07827	6.01667	6.13693	6.14867	5.94008	6.16841	6.28141	6.17237	6.13384	6.05131	6.10602	5.90708	5.99559	6.01626	6.56561	6.12567
GL50803_14578	6.04172	5.83403	5.79874	5.78255	5.80162	5.84478	5.75252	5.72532	5.72078	5.66034	6.72828	6.00244	6.1768	6.02821	6.07498	5.83248	5.85685	5.87793	5.82663	5.97557	5.92823	6.10052	6.64021	5.9091	5.88494	5.92868	5.77889	5.81809	5.95849	5.90389	6.12113	6.31847	6.01294	6.53298	6.03664
GL50803_21505	9.17628	9.28234	9.27718	9.21304	9.33465	9.30447	9.46113	9.64003	9.56846	9.8096	8.93329	9.00419	8.70873	9.07705	8.98457	8.3634	8.12008	7.85304	8.00016	7.72418	8.33913	8.26688	8.31957	7.95323	8.49813	8.8051	8.40448	8.25381	8.05536	8.33473	8.2194	8.12394	8.51255	7.88043	8.17242
GL50803_15918	8.7849	8.75032	8.44574	8.72597	8.22407	8.10599	8.00561	7.89913	7.86996	7.6524	8.11025	9.01161	7.77471	7.9071	7.80004	7.99768	7.70803	7.96101	8.54776	7.09976	7.51409	8.1337	8.20921	8.16031	7.78548	8.02326	8.06171	7.70654	7.86866	7.85641	8.02587	7.6618	7.50234	8.3932	8.41287
GL50803_94003	7.47974	7.37667	7.4313	8.64099	9.10838	9.4925	10.0091	10.4774	10.3601	10.5829	10.7	7.63185	7.64603	7.39045	7.53339	8.42088	8.45964	8.66016	8.98916	9.08529	9.56122	9.86531	11.1928	7.71202	7.55699	7.57914	8.12158	9.19831	9.45725	9.60705	9.89241	10.2418	10.1738	11.7136	7.80942
GL50803_4414	5.5755	5.63706	5.61143	5.74712	5.8967	6.06297	6.16253	6.51194	6.27669	6.62292	9.51858	5.62276	5.77579	5.4891	5.71598	5.79954	5.97263	5.93507	6.12579	6.23983	6.36809	6.44574	8.8845	5.75376	5.70854	5.80727	6.01404	6.09227	6.20204	6.28582	6.2374	6.56471	6.61587	7.98522	5.84873
GL50803_4415	5.89921	5.91452	5.92967	6.14009	6.08167	6.21102	6.24437	6.44079	6.36748	6.54002	9.37428	5.73941	6.24667	6.09046	6.26572	6.26037	6.38125	6.32268	6.40788	6.44753	6.45242	6.34934	8.12733	6.11212	6.23366	6.26306	6.58275	6.58719	6.61374	6.52196	6.64081	6.86447	6.68012	7.78138	6.11684
GL50803_4416	5.20274	5.12378	5.0291	5.12976	5.35242	5.38289	5.51407	5.82832	5.77026	6.0135	7.98186	4.69098	5.35647	5.18726	5.30143	5.38499	5.339	5.35191	5.58043	5.32686	5.5478	5.67912	7.4144	5.39659	5.23565	5.25331	5.44229	5.5326	5.72681	5.69587	5.82568	6.05581	5.76031	7.39365	4.95512
GL50803_4420	5.3806	5.45045	5.20835	5.39832	5.62614	5.76607	6.07149	6.31318	6.27399	6.42324	6.5854	5.08192	5.62868	5.6805	5.6403	5.67594	5.74168	5.99675	6.02952	6.35704	6.5748	6.76486	6.55203	5.52017	5.56305	5.50422	5.47787	5.78826	6.07618	6.23745	6.55164	7.05014	6.82799	6.56099	5.22395
GL50803_15988	7.6072	7.68592	7.56442	7.36358	7.13867	7.07731	7.03139	6.89527	6.92995	6.95	7.43601	7.75196	7.82125	7.89904	7.7928	7.09921	6.85939	6.58615	6.43319	6.37362	6.56994	6.4667	8.60567	6.66855	7.37235	7.71788	7.05499	6.81811	6.46473	6.50308	6.6192	6.61098	6.68639	8.7965	7.37157
GL50803_15987	7.04494	6.85188	6.8099	6.72103	6.63745	6.58128	6.73302	6.72535	6.73715	6.76865	7.51223	7.06469	7.2564	6.94038	6.93735	7.12602	7.2416	7.28513	7.30763	7.50352	7.21559	7.23184	8.23529	7.39558	6.95832	6.70506	6.63546	6.83876	7.01094	6.88817	7.03079	7.30279	6.91601	8.69095	7.08799
GL50803_101904	5.26804	5.42224	5.58033	5.35404	5.15696	5.0794	4.79593	4.73389	4.75371	4.88213	6.24365	5.15934	5.28002	5.41284	5.50515	5.05572	5.14082	4.93518	4.95106	4.91363	4.69642	4.77179	4.64655	4.84284	5.10628	5.22564	5.07506	4.94516	4.87845	4.70892	4.50653	4.72304	4.53808	4.73513	4.83093
GL50803_21512	6.22173	6.40905	6.17246	6.06881	5.73158	5.43949	5.35649	5.00979	5.02872	4.94585	5.89865	6.21781	6.26892	6.50957	6.21937	6.00292	5.85795	5.84352	5.58379	5.62572	5.26248	5.29368	5.16378	5.78948	6.18667	6.11365	5.61202	5.54724	5.45225	5.11681	5.2907	5.45027	5.10433	4.91472	5.83478
GL50803_101906	7.50209	7.53034	7.32474	7.23982	6.83061	6.64491	6.42237	6.13676	6.19036	6.02338	5.00355	7.50247	6.98285	6.95838	6.85193	6.6098	6.46847	6.35619	6.63164	6.27203	6.12784	6.39925	5.31588	6.7459	6.64797	6.64142	6.40932	6.27252	6.1127	6.1012	6.17951	6.11034	5.9355	4.52365	6.77175
GL50803_137699	4.80234	4.83523	4.61229	4.42039	4.19624	3.96254	3.67206	3.70187	3.68243	3.57426	3.26066	4.74221	4.44563	4.47252	4.27909	4.35033	4.15756	3.94934	4.07022	3.76115	3.98392	3.82673	3.63769	4.20615	4.18519	3.99458	4.03012	3.97189	3.66595	3.82865	3.77003	3.98127	3.74473	3.18289	4.34458
GL50803_103946	3.94981	3.84613	3.92114	4.03865	4.01647	3.97315	3.92465	3.72515	3.52141	3.70768	2.19705	4.10602	3.63773	3.74005	3.83751	3.30299	3.6049	3.42568	3.39367	3.58439	3.82971	3.62398	3.54538	3.27308	3.50363	3.51571	3.57184	3.47576	3.51647	3.79084	3.46545	3.78725	4.07296	4.17463	3.3935
GL50803_114497	5.77291	5.62392	5.66112	5.68378	6.01812	5.91391	5.80098	6.03799	5.11792	5.59692	4.96823	5.20874	3.04737	4.52499	4.21754	3.71772	3.26505	2.92178	4.66809	1.87065	3.52924	4.28181	5.17409	3.59479	3.71446	4.34618	4.57808	3.40604	3.693	4.22224	4.4617	3.56302	4.16365	5.0614	4.38047
GL50803_60376	2.81543	2.46502	2.32753	2.47704	2.48814	2.19979	1.9769	1.88806	1.86335	2.18354	0.186441	2.4034	2.11533	2.5507	2.14143	2.32494	2.22727	2.12449	2.47436	1.81346	2.2816	2.24124	1.98583	2.41145	2.49841	2.25141	2.4129	2.13991	2.16231	2.21787	2.39239	2.48418	2.32693	1.49939	2.33637
GL50803_42657	6.10386	6.08372	6.33835	6.62757	6.89744	7.07546	7.10052	7.22921	7.12973	7.2323	5.4893	5.80646	5.40584	5.88251	5.84371	5.86822	5.91485	6.22868	6.86442	6.18264	6.79569	6.98483	6.4832	5.79451	5.75825	6.03726	6.27899	6.46308	6.79571	7.10493	7.16829	7.30422	7.30002	6.02157	5.70281
GL50803_103094	7.05423	6.78035	7.14206	7.2235	7.27469	7.22202	7.22622	7.3525	7.32187	7.4313	6.62373	7.14461	6.53684	6.6623	6.91328	6.81356	6.69625	6.75301	7.12068	6.22163	6.61627	6.5623	6.10622	6.67265	6.5892	6.72143	6.83092	6.8493	6.78318	6.64296	6.79815	6.54221	6.48848	5.4152	6.91322
GL50803_4789	8.42237	8.36638	8.31114	8.31498	8.18802	8.1639	8.08524	8.0846	8.04362	8.05767	9.73129	8.39964	8.2318	8.22513	8.17776	8.06954	8.07462	8.03693	8.13278	7.87621	7.8875	7.95333	8.2997	8.12155	8.22055	8.17124	8.23238	8.12249	8.09063	7.9852	8.17935	8.14088	7.86652	7.96031	8.24336
GL50803_16162	5.96633	5.81536	5.78516	5.77297	5.75971	5.75996	5.72699	5.69027	5.55683	5.56751	8.30956	5.93065	5.72169	5.72182	5.70621	5.81305	5.7861	5.99452	6.02336	5.87667	6.07046	6.25208	7.05859	5.9704	5.58931	5.64516	5.58586	5.74515	5.82668	5.87143	5.96177	6.17129	6.04149	6.62432	5.77649
GL50803_16161	6.75948	6.84835	6.79643	6.69675	6.4826	6.41312	6.3101	6.35947	6.43363	6.59868	9.29178	7.05628	7.10641	6.98613	7.06024	6.83117	6.87246	6.62646	6.44706	6.37938	6.17983	6.17245	7.01479	6.78054	7.08365	7.00158	6.97839	6.81003	6.56112	6.50381	6.37835	6.27431	6.24022	6.70604	6.94901
GL50803_4365	7.97761	8.03969	8.04921	8.03478	8.11511	8.14495	8.39463	8.52404	8.6954	8.71982	8.74327	7.97475	8.24402	8.20366	8.1058	8.0639	8.12304	8.12269	8.17895	8.30232	8.30002	8.35851	7.77011	8.07864	8.11959	7.98958	7.95484	8.01975	8.20428	8.2735	8.19792	8.21741	8.20516	7.37624	7.90003
GL50803_4364	3.43938	4.07108	4.37917	4.19028	4.42796	4.5655	4.62894	4.59552	4.68476	4.65188	5.86705	3.48586	3.7788	4.00768	4.01986	4.19764	4.36289	4.75386	4.88738	5.13985	4.92181	4.9805	5.14293	3.84804	3.8315	3.83109	3.84009	4.17417	4.48846	4.54824	4.69909	4.67659	4.72025	5.05703	3.23265
GL50803_41304	7.08958	7.32581	7.34471	7.35129	7.4121	7.37895	7.3725	7.39574	7.56001	7.63511	7.56768	7.12812	7.10898	7.33643	7.54009	6.99799	7.0848	6.81774	7.03574	7.17926	7.41407	7.4285	7.3362	6.81065	7.40228	7.58148	7.42242	7.36546	7.223	7.39095	7.19135	7.18899	7.59377	7.4505	7.03831
GL50803_13948	6.05165	6.26827	6.15297	6.15982	6.74135	6.80351	7.49101	7.74968	7.95968	7.97634	9.22789	6.03248	5.52001	5.98672	6.0476	6.39059	6.30135	6.73368	6.70812	6.59693	7.20046	7.36433	8.29616	6.24484	6.12719	6.37164	6.5256	6.59269	6.8278	7.28061	7.33375	7.45245	7.59895	7.8359	6.0244
GL50803_5522	6.64203	6.92873	6.90352	6.8481	7.04912	6.90506	6.98679	6.92133	7.04921	6.99688	7.44888	6.77674	6.9233	7.12113	7.12453	7.28474	7.35652	7.35876	7.29132	7.46767	7.43517	7.45802	7.02907	7.16981	7.32973	7.25379	7.26742	7.3493	7.37731	7.39844	7.37705	7.50822	7.46148	7.05475	7.16632
GL50803_13947	7.25657	7.22438	7.28188	7.14275	7.31116	7.27741	7.62872	7.92794	8.05154	8.29433	8.03118	7.37844	7.46834	7.42235	7.42012	7.61079	7.58574	7.64723	7.4604	7.54912	7.55855	7.43782	7.91702	7.69026	7.50545	7.50873	7.55366	7.51989	7.49111	7.61744	7.51363	7.39802	7.59488	7.80109	7.64488
GL50803_5517	9.4255	9.20541	9.23804	9.10903	9.04512	9.00868	8.828	8.61523	8.71514	8.62341	8.91383	9.20316	7.82595	8.42127	8.25902	8.31394	8.27287	8.68622	9.58442	7.89557	8.51473	9.32675	8.07532	8.48559	8.05381	8.4044	8.20509	7.83546	7.85376	7.93841	8.65537	8.22171	8.22636	7.95622	8.43846
GL50803_5515	5.28076	5.69164	5.51838	5.43927	5.95421	6.07596	6.44974	6.78124	6.76825	6.863	6.90364	5.30841	4.85895	5.50877	5.46101	5.83007	5.82022	6.15644	6.19864	5.65992	6.43737	6.72119	7.60938	5.81693	5.57916	5.66	5.85432	5.76478	5.94505	6.2251	6.72543	6.86382	6.64263	7.08186	5.57184
GL50803_5514	2.62914	2.86211	2.58201	2.77451	3.36336	3.37171	3.87168	4.30633	4.1831	4.0737	3.84906	2.57647	1.9959	2.68357	2.51849	2.93179	3.02867	3.08215	3.43137	3.14868	3.84052	4.02817	5.06195	3.17619	2.6391	2.76125	3.13576	2.91769	3.52251	3.81929	3.9496	4.25858	3.90149	4.26066	2.74704
GL50803_5513	5.10841	5.13772	5.04546	4.95441	5.44833	5.46885	5.91248	6.23021	6.33237	6.20796	5.87342	4.97415	3.42962	4.20549	4.15324	4.41941	4.04663	4.67778	5.53267	3.73058	5.0414	6.0342	6.4581	4.52039	4.09848	4.60737	4.85045	4.42387	4.54894	5.41592	5.83274	5.74855	5.77346	6.25097	4.80696
GL50803_60379	9.97562	10.1686	10.1463	9.89963	10.1528	10.2619	10.1974	10.1573	10.1394	9.91451	11.7925	9.63533	4.49366	6.66523	6.32073	5.90309	5.23995	6.00233	8.26053	3.7561	6.71503	8.25513	8.35286	5.73557	6.39863	7.45995	7.29617	5.93285	6.80876	7.59431	8.48306	7.72236	8.10469	8.83971	6.83401
GL50803_18559	3.83381	3.93398	3.9768	3.88707	4.40939	4.48989	4.65482	4.50429	4.46515	4.40824	4.17924	3.66762	3.59139	3.84179	3.92676	3.62048	3.86675	4.17166	4.15829	3.9004	4.37816	4.44912	3.9691	3.7164	4.02772	3.98989	4.03923	4.10104	4.06843	4.57907	4.39649	4.52752	4.77096	3.94824	3.79467
GL50803_96580	5.44979	5.64847	5.73359	5.72907	6.09916	6.14272	6.25945	6.21385	6.1437	6.09726	5.78599	5.43661	5.33378	5.53778	5.70901	5.53927	5.51182	5.55238	5.70571	5.82455	6.0403	5.94863	5.71593	5.26867	5.62217	5.55274	5.54969	5.72525	5.76937	6.09733	6.16747	6.23978	6.2553	5.57026	5.52585
GL50803_2863	3.35372	3.45883	3.32333	3.18407	3.16506	3.31024	3.24965	3.38866	3.21031	3.13817	2.77109	3.04386	3.48135	3.6125	3.43274	3.64266	3.84923	3.88795	4.02162	4.01475	3.8672	3.71438	3.79296	3.84804	3.79687	3.58579	3.50114	3.48931	3.64394	3.46442	3.7453	3.825	3.24554	3.63343	3.53821
GL50803_2864	7.72041	7.72608	7.74256	7.67604	7.55245	7.44836	7.42777	7.50525	7.55519	7.56751	7.34563	7.78863	7.7323	7.81265	7.80102	7.79196	7.71167	7.72692	7.68456	7.38463	7.4782	7.50479	6.99457	7.75652	7.71966	7.82713	7.80813	7.7098	7.649	7.56625	7.62218	7.67441	7.52584	6.77011	7.84678
GL50803_15939	4.47734	4.49597	4.74644	4.7709	4.90452	4.98552	5.06623	5.42663	5.46808	5.4683	8.63953	4.64686	4.69333	4.62151	4.75854	4.94851	5.05362	5.24675	5.03426	5.43825	5.50767	5.55249	7.85508	4.77064	4.77632	4.77491	4.70361	4.88237	4.96534	5.17851	5.27004	5.61174	5.54102	7.29979	4.85876
GL50803_33629	7.5223	7.58818	7.45047	7.40499	7.35986	7.4268	7.46848	7.58095	7.68815	7.68014	10.7741	7.54716	7.84829	7.8349	7.69774	7.82809	7.87507	8.00198	7.9012	7.99457	7.89141	7.81238	9.94563	8.06126	7.88539	7.77388	7.72103	7.76862	7.89831	7.64453	7.7326	7.78767	7.64081	9.37293	7.94267
GL50803_13413	6.04917	6.21336	6.19464	6.09083	6.0279	6.05112	6.28546	6.50018	6.59046	6.67712	7.87734	6.16352	6.22692	6.33138	6.19262	6.41173	6.43656	6.40166	6.50123	6.50811	6.49324	6.38004	7.38695	6.51702	6.48662	6.33048	6.27032	6.33482	6.47256	6.34573	6.31926	6.48608	6.32394	7.09256	6.37655
GL50803_13412	6.94531	7.07539	6.85143	6.60345	6.01444	5.6804	5.36697	5.15182	5.15565	5.25008	5.1578	7.08192	6.25877	6.733	6.39993	6.31492	5.77454	5.75108	5.77479	5.43193	5.20717	5.33796	5.27335	6.06294	6.36779	6.42127	6.13359	5.72238	5.47112	5.26206	5.24909	5.30133	5.17739	4.56728	6.28721
GL50803_96570	8.67341	8.89124	8.86621	8.81695	8.54993	8.44805	8.25939	8.0891	8.02765	7.98976	9.77665	8.78762	8.0638	8.35986	8.3546	7.80369	7.59759	7.32398	7.2831	7.27416	7.45948	7.30301	8.85556	7.35231	7.85536	8.19488	7.92415	7.77693	7.60089	7.51137	7.53073	7.41094	7.60998	8.72986	7.71478
GL50803_41311	3.96038	4.32371	4.6513	4.60086	4.68737	4.76501	4.89338	4.9394	4.73021	5.04811	7.47217	4.19858	3.97653	4.26454	4.26395	4.14423	3.96357	3.98134	4.13105	4.17847	4.43988	4.43855	6.44112	3.77866	4.14642	4.33882	4.33367	4.43091	4.00075	4.56793	3.76019	3.99553	4.80466	6.1684	3.87653
GL50803_6650	5.71943	6.03861	6.25779	6.19731	6.23404	6.24207	6.1403	6.15615	5.8799	6.04682	9.13673	5.9622	5.88786	6.02821	6.28366	5.9704	5.83254	5.68738	5.70878	5.76043	5.96327	5.76058	8.13988	5.54873	6.02724	6.32862	6.2857	6.20843	5.77317	6.00023	5.67017	5.6825	6.2987	7.71089	5.78656
GL50803_23389	7.97924	8.16837	8.0967	8.14687	8.20751	8.34236	8.56092	8.7997	8.76321	8.94818	9.91368	8.08247	8.10972	8.25674	8.32367	8.05772	7.89522	7.75364	7.86206	8.08293	8.4204	8.44335	9.77575	7.61441	8.13477	8.29407	8.10624	8.29874	8.34481	8.60247	8.68979	8.81809	9.15441	9.9584	8.04358
GL50803_96562	4.01213	4.35588	4.58121	4.96567	5.36789	5.60732	5.93848	6.35388	6.25124	6.61118	5.8039	4.42795	4.65442	4.65721	4.78795	4.86135	4.81273	4.83115	5.21155	5.5105	6.0921	6.15426	5.87925	4.29757	4.54252	4.77218	5.06618	5.64732	5.38582	6.24708	5.6649	5.9426	7.07209	6.30166	4.37751
GL50803_16630	6.487	6.75419	6.77892	7.79044	8.36375	8.67947	8.97937	9.31225	9.25285	9.51131	8.29657	6.63411	6.34333	6.48825	6.57734	7.13241	7.06502	7.25786	7.95913	7.99215	8.62786	8.78362	7.92009	6.16746	6.32242	6.45995	7.26548	8.11895	8.35183	8.84474	8.68069	9.03885	9.61252	8.50318	6.33296
GL50803_8118	10.7844	10.7358	10.779	10.6758	10.4705	10.3446	10.2608	10.1417	10.1263	10.0533	8.78361	10.7768	9.88106	10.3719	10.3047	10.3718	10.184	10.3922	10.654	9.88038	10.3422	10.6682	9.6088	10.5047	10.0668	10.4248	10.4601	10.1909	10.3486	10.3584	10.6245	10.7255	10.4872	8.95914	10.5133
GL50803_14641	8.83137	8.74653	8.6572	8.85206	8.94066	9.10338	9.25139	9.51843	9.49417	9.55998	8.55212	8.67807	8.44509	8.50385	8.42522	8.34703	8.2739	8.40687	8.5117	8.5821	8.82884	8.76506	8.39038	8.25002	8.2391	8.21763	8.31198	8.55394	8.87042	8.92275	9.14003	9.27371	9.29464	8.33175	8.23869
GL50803_28433	6.2841	6.38001	6.23942	6.13636	5.90335	5.73912	5.54209	5.50772	5.35827	5.2751	4.60419	6.35942	6.43146	6.45145	6.22426	6.34988	6.31578	6.39913	6.27941	6.41985	5.99022	5.91979	5.11644	6.60626	6.58775	6.33696	6.2361	6.23983	6.18308	5.85434	5.93905	5.9141	5.71468	4.42549	6.41527
GL50803_8122	4.99211	4.91835	4.78982	4.86708	5.00195	5.18249	5.50777	5.86676	5.59491	5.68046	5.33459	4.80779	4.97403	4.77019	4.9024	5.14971	5.14441	5.09414	5.3538	5.30455	5.28243	5.26605	5.52772	4.89997	4.93942	4.70507	4.78703	5.08557	5.40885	5.25687	5.49287	5.46059	5.36456	5.04386	4.8819
GL50803_8123	5.49413	5.59894	5.59151	5.54997	5.54339	5.5482	5.60097	5.65435	5.62353	5.76179	4.31662	5.52214	5.67385	5.66889	5.79844	5.68131	5.59302	5.57203	5.45976	5.616	5.7054	5.68509	4.9343	5.56796	5.77613	5.80993	5.76387	5.73238	5.63633	5.53077	5.70905	5.75275	5.63335	5.0614	5.57829
GL50803_8125	6.86737	7.04489	7.07908	7.12467	7.16714	7.2523	7.54122	7.66984	7.66218	7.80108	6.33582	7.02732	7.15202	7.16983	7.26141	7.18719	7.20246	7.08718	7.15882	7.28997	7.59531	7.71684	6.78516	7.01679	7.32757	7.27757	7.2919	7.32447	7.37606	7.59225	7.63939	7.91036	8.04277	7.08615	7.20519
GL50803_14642	3.85096	3.97079	3.68257	3.93939	4.39057	4.32771	4.64338	4.99072	4.71965	5.10131	4.62953	4.00244	3.6991	4.24903	3.9694	4.21994	4.13605	4.38492	4.52199	4.61766	4.86735	5.06997	5.32978	4.48349	4.12265	4.10717	4.30754	4.3663	4.49769	4.92505	4.63053	5.03982	5.28599	5.03944	3.97371
GL50803_102662	6.37288	6.21007	6.07063	6.08954	6.52117	6.50697	6.7677	7.08824	6.79931	7.19213	7.14502	6.77264	5.43892	6.03952	5.91088	5.8904	5.7861	6.23912	6.32919	6.03723	6.50092	6.84975	7.53231	6.39149	6.06826	6.0952	6.29618	6.17843	6.32386	6.68672	6.93783	7.09939	7.14473	7.67716	6.10973
GL50803_8135	5.01003	4.89665	4.90906	5.02336	4.84771	4.81307	4.8088	4.75383	4.80209	4.73358	4.90739	5.31406	5.172	4.99839	4.99015	5.16128	5.19557	5.0752	5.10595	5.13012	4.93951	4.80783	4.63167	5.34437	5.08388	4.89521	4.9455	4.97676	4.84748	4.76607	4.70423	4.55987	4.66487	4.59765	5.16858
GL50803_96537	7.37692	7.52151	7.27704	7.1939	7.09401	7.06805	7.35506	7.58652	7.7312	7.90332	7.62801	7.43488	7.50199	7.70022	7.57195	7.37942	7.17459	7.0211	6.96745	6.87714	7.08533	7.15429	6.85733	7.02109	7.47174	7.5307	7.14628	7.13115	6.99799	7.10204	7.18998	7.20442	7.24727	6.94801	7.35588
GL50803_16629	5.04772	5.01468	5.30121	5.58688	6.18575	6.33297	6.73369	7.17108	7.28651	7.73046	7.84201	5.2798	5.25423	5.17294	5.46929	5.66379	5.7393	5.91745	6.09441	6.37114	6.62724	6.61097	6.69673	5.44538	5.34413	5.481	5.75285	6.05859	6.09354	6.56249	6.33923	6.49112	6.95981	6.82248	5.34695
GL50803_8140	7.45003	7.20354	6.94946	7.06312	6.87325	6.90921	6.88839	6.95678	6.92364	6.98024	8.60737	7.50947	7.46754	7.18162	7.12767	7.17821	7.09552	7.05747	7.17558	7.00184	7.01789	7.16555	7.8235	7.39185	7.27192	7.01203	7.06617	7.1494	7.25239	7.07869	7.4183	7.57345	7.21775	7.64916	7.49777
GL50803_8141	4.52799	4.74702	4.63409	4.76125	4.6114	4.59329	4.64911	4.68429	4.58351	4.63908	7.5095	4.63787	4.34449	4.55684	4.60475	4.68822	4.71455	4.67778	4.99955	4.65883	4.70827	4.94857	6.67693	4.64259	4.59529	4.49598	4.50441	4.58713	4.50687	4.63616	4.76207	4.98608	4.81487	6.10427	4.37158
GL50803_24330	6.09068	6.12163	6.10069	6.30314	6.32108	6.39053	6.42321	6.43551	6.46006	6.52549	6.84103	6.23182	6.45105	6.24116	6.23012	6.42539	6.51157	6.68245	6.67471	6.89792	6.87341	6.99809	6.63835	6.64507	6.31283	6.21663	6.3253	6.5424	6.67404	6.7116	6.83612	7.25568	7.0927	6.91221	6.30599
GL50803_6226	10.7628	11.1271	11.2746	11.3196	11.2216	11.2058	11.0382	10.8377	10.7635	10.5685	8.85033	10.809	9.79822	10.6169	10.6403	10.2125	10.1722	9.92691	9.96937	9.89976	10.0445	9.86433	9.01357	9.46265	9.89226	10.2054	10.354	10.1465	10.1711	10.2764	10.2322	10.2903	10.3086	8.89425	9.53984
GL50803_6227	0.608754	0.301457	0.861385	2.31047	2.77021	3.35151	4.26062	4.77071	4.71167	4.96032	5.75409	0.538318	0.613377	0.242288	0.45508	1.85955	2.12905	2.30872	2.84217	2.7621	3.61987	4.35483	5.51965	0.80398	0.491636	0.187481	1.42693	2.87704	2.97082	3.70704	3.73529	4.69418	4.94609	5.81478	0.712701
GL50803_102654	6.91437	7.23685	7.47363	7.58637	7.73693	7.80005	7.90284	8.01991	8.00417	8.11631	7.87998	7.18322	7.15948	7.30349	7.63106	7.24043	7.27027	7.13471	7.40653	7.43684	7.8023	7.82698	8.26454	6.81684	7.31757	7.56265	7.58857	7.807	7.65176	7.90782	7.70562	7.7904	8.19176	8.72367	6.99845
GL50803_16623	4.66361	4.75609	4.52164	4.74174	4.87233	4.8481	5.05979	5.14321	5.09358	5.09196	4.81764	4.47917	4.74716	4.64837	4.70628	4.87547	5.01289	5.14346	5.23732	5.18376	5.4167	5.45096	5.53574	4.95042	4.89801	4.89018	4.7789	5.17631	5.46172	5.36697	5.53964	5.6707	5.4208	6.78602	4.77586
GL50803_16622	6.21181	6.2373	6.07063	7.47755	7.77878	7.97232	8.21682	8.53848	8.55014	8.5006	7.50266	6.12544	6.16992	6.20242	6.12298	7.4169	7.54278	7.9673	8.46475	8.63962	8.82612	9.10823	9.05356	6.45721	6.39202	6.26306	6.87352	8.25505	9.03249	8.80869	9.10182	9.57118	9.04804	10.329	6.3721
GL50803_30354	6.2305	6.95391	7.1602	7.15632	7.47419	7.60096	7.76768	7.94321	7.90826	8.00355	7.25085	6.22483	5.87945	6.57324	6.54403	6.09125	6.24887	6.14033	6.50919	6.45456	6.91363	6.82087	6.8315	5.53527	6.42964	6.69789	6.52803	6.51782	6.70958	6.8848	6.81667	6.93029	7.13814	7.24424	5.49207
GL50803_14331	1.94701	1.27351	1.17866	1.80877	2.00489	1.8193	2.1324	2.666	1.99186	2.39311	3.45459	5.78626	1.24235	1.17761	0.908978	0.570687	1.05999	1.25132	1.50104	0.652966	1.88202	2.10528	3.2067	2.48797	1.67387	2.25141	2.06628	2.17387	2.95303	2.9158	3.14085	3.32025	3.3823	5.69348	5.87622
GL50803_50110	2.14543	1.97863	1.90815	2.14211	1.79198	2.13509	1.45515	1.37313	1.02899	1.34774	1.11915	1.9208	-0.089699	1.36196	0.947405	0.475037	0.418418	0.667789	1.95894	0.516285	1.199	2.03217	1.93822	1.41338	1.3308	0.937393	1.50784	1.23909	1.4062	1.96974	1.94835	1.85112	1.7568	1.15187	1.04635
GL50803_114773	5.30378	5.34422	5.03566	5.12474	5.45197	5.47913	5.40983	5.61906	5.05207	5.14178	5.26516	4.75612	3.75272	4.31756	3.96003	4.00134	3.80901	3.97681	4.88195	3.85388	4.37816	4.79959	5.88554	4.24709	4.28137	4.23955	4.55288	4.15304	4.31473	4.71146	4.86436	4.75412	4.76833	5.95275	4.28587
GL50803_137690	4.37038	4.42573	4.26084	4.41219	4.468	4.50825	4.26809	4.42479	4.13222	4.04682	4.44204	3.9646	2.74273	3.53787	3.46621	3.26774	2.98922	3.32238	4.29544	2.62479	3.66921	4.17972	5.50747	3.64579	3.46004	3.75017	3.99781	3.52263	3.65498	3.99585	4.29792	4.05121	4.15965	5.5393	3.65025
GL50803_16323	2.56128	3.021	2.56395	2.46122	2.98612	2.87355	2.89157	2.28253	2.15759	2.71909	2.05466	2.08853	2.76378	2.84705	2.61713	2.83879	2.7924	3.09056	2.97063	2.9683	2.98362	2.82105	3.6961	2.88694	2.98507	2.64669	3.05729	3.12283	2.7922	2.90699	3.13324	3.16907	2.85815	3.18289	2.55103
GL50803_16322	11.7229	11.4296	11.6487	11.6118	11.4689	11.2996	11.1662	11.0923	11.1507	11.0879	12.3227	11.5692	11.9644	11.6221	11.4791	11.4602	11.3532	11.0886	11.0083	10.6186	10.5432	10.4747	13.9715	11.4201	11.2449	11.3318	11.3105	11.0402	10.6612	10.4261	10.4445	10.4375	10.3054	14.3891	11.4446
GL50803_16321	8.15468	8.14956	8.2099	8.21801	8.12681	8.12143	8.04421	7.93388	8.02389	7.95224	7.55649	8.23182	8.28577	8.16518	8.38467	8.05048	8.09265	7.9064	7.95072	8.09197	8.1065	8.11501	7.74006	8.01082	8.20931	8.30521	8.23906	8.17058	8.02214	8.11016	8.10453	8.19338	8.30928	7.94208	8.12979
GL50803_25715	5.08202	5.23389	5.11842	5.02605	4.82547	5.00634	4.99596	4.92188	4.99187	5.20738	5.80168	5.20671	4.7178	5.06856	5.00844	4.83991	4.85065	4.82864	5.25425	4.71975	5.12335	5.48902	5.89804	4.93456	5.0274	5.08314	5.08388	4.96953	5.1367	5.17851	5.36074	5.63166	5.53485	5.69348	4.95711
GL50803_940	5.51939	5.60062	5.4561	5.42099	5.37557	5.32708	5.3791	5.27915	5.23755	5.11801	5.01897	5.47581	5.65567	5.52335	5.52752	5.53631	5.62168	5.68599	5.66356	5.79038	5.68756	5.77886	5.57906	5.43575	5.55123	5.56699	5.38275	5.52439	5.66393	5.49741	5.888	6.14487	5.73634	5.50446	5.49617
GL50803_93856	6.25433	6.67673	6.84491	7.01923	7.31416	7.63207	7.7561	7.81723	7.8049	7.67106	6.60597	6.45208	6.43474	6.82022	6.85762	7.10371	7.16931	7.30152	7.48928	7.58552	7.81434	7.84743	7.30839	6.52612	6.96502	7.11956	7.31831	7.48693	7.70156	7.96385	7.86072	8.10214	8.15756	8.45049	6.62303
GL50803_5820	6.49429	6.517	6.66706	7.05919	7.49151	7.75904	8.10572	8.43444	8.40642	8.46135	6.84212	6.59207	6.63075	6.56856	6.66282	6.99907	7.1569	7.32843	7.61254	7.87505	8.07337	8.16476	7.73223	6.72892	6.74199	6.80926	7.03636	7.46009	7.8922	8.14827	8.07853	8.38905	8.35592	7.52666	6.6996
GL50803_5821	5.5582	5.88452	5.91014	6.23151	6.45479	6.57563	6.97485	7.22972	7.18262	7.45266	6.07315	5.95619	5.86856	5.88502	6.03093	6.15437	6.23797	6.48694	6.63891	6.80928	6.99389	7.24555	6.02879	5.81446	5.85399	5.90645	6.21617	6.67946	6.83995	7.13589	7.05262	7.63282	7.70158	6.37187	5.81525
GL50803_5822	6.36494	6.59907	6.58213	6.53615	6.47993	6.47652	6.44067	6.32179	6.4489	6.49812	5.24235	6.52051	6.49969	6.61846	6.75371	6.3766	6.38505	6.29385	6.35492	6.27556	6.42934	6.38831	5.25404	6.31479	6.61357	6.68343	6.64593	6.5012	6.35553	6.40403	6.2524	6.45546	6.67172	6.13359	6.38246
GL50803_5823	6.36494	6.517	6.3034	6.17566	5.80447	5.70609	5.77236	5.68286	5.65991	5.64762	5.92754	6.38024	6.37445	6.51687	6.40166	6.33208	6.12602	6.09926	5.90241	5.8685	5.55273	5.74351	5.71945	6.16261	6.3787	6.32397	6.07284	5.91915	5.90858	5.56057	5.9015	5.80766	5.64055	5.92906	6.19869
GL50803_21474	8.03971	8.20166	8.42024	8.46553	8.43825	8.41497	8.33049	8.1827	8.18042	8.10379	7.12823	8.11711	7.67929	7.91203	8.12058	7.61114	7.60805	7.38463	7.44666	7.53629	7.6988	7.56839	7.00327	7.2553	7.62131	7.96499	7.94881	7.87695	7.71548	7.90561	7.74326	7.72629	8.0646	7.599	7.53772
GL50803_7046	6.40904	6.48917	6.26199	6.24428	6.38806	6.48535	6.859	7.14219	7.41814	7.42012	10.2122	6.36307	6.47038	6.41369	6.37724	6.56114	6.54801	6.68939	6.67157	7.00663	6.97009	7.01953	9.55557	6.47768	6.42883	6.09192	6.01288	6.31783	6.6686	6.73232	6.86625	6.83238	6.63256	8.68495	6.3299
GL50803_32676	7.87898	7.92343	7.91719	7.93201	8.04344	8.11874	8.32692	8.42203	8.39152	8.45862	9.50649	8.05122	7.94416	7.91909	8.01317	7.85476	7.79125	7.77727	7.74044	7.71315	8.02059	8.08878	8.87189	7.58713	7.85506	7.90364	7.93181	7.84141	7.92936	8.03482	8.1429	8.39489	8.4238	8.45754	7.91081
GL50803_7236	5.46286	5.61564	5.54394	5.59234	5.95549	5.84261	6.08319	5.99436	5.93461	5.75231	6.45683	5.78626	5.66409	5.73302	5.75171	5.8904	5.7582	5.9651	5.67461	5.74522	5.93707	5.87737	6.75629	5.7447	5.61225	5.80326	5.87861	5.84073	5.6502	6.06602	5.77772	5.72163	6.1392	6.76476	5.74472
GL50803_7234	6.88829	6.64698	6.77892	6.84962	7.09401	6.9598	6.90106	6.58293	6.52142	6.29698	7.54255	7.02273	6.82285	6.66596	6.7971	6.60133	6.50669	6.30473	6.32017	6.12211	6.3559	6.10498	6.923	6.389	6.45762	6.9421	6.71642	6.71449	6.5179	6.40246	6.48226	6.4056	6.34963	6.53769	6.8517
GL50803_7233	6.39254	6.02116	6.24368	6.14257	6.07108	6.00789	5.9823	5.89397	5.9539	5.95379	5.40084	6.38562	6.50829	6.2244	6.37812	6.05553	6.14319	5.88761	5.85742	5.74395	5.8177	5.65953	4.99954	5.948	6.0176	6.02011	5.8098	5.84468	5.73203	5.72373	5.76793	5.59467	5.54256	4.66803	6.10705
GL50803_7231	5.2094	5.45787	5.46586	5.28158	5.18125	5.00634	5.0854	5.05642	5.17124	5.1917	4.5836	5.24668	5.41085	5.64834	5.47094	5.63088	5.65861	5.6998	5.70417	5.79654	5.60755	5.6335	4.50668	5.54575	5.74143	5.34617	5.16927	5.22975	5.20783	5.2075	5.19351	5.17962	4.95305	4.21437	5.34695
GL50803_7230	7.36652	7.08861	7.19655	7.10698	6.93103	6.78141	6.60608	6.28017	6.47584	6.33238	6.40201	7.52255	7.44857	7.34831	7.52071	7.58704	7.61098	7.51606	7.41125	7.2537	6.99932	7.07233	6.3823	7.57109	7.28224	7.39489	7.35795	7.35671	7.23179	6.91643	7.0415	6.8508	6.6961	6.12527	7.64611
GL50803_17192	7.79321	8.01787	8.10959	8.0956	8.09375	8.0392	8.03766	7.90424	7.9717	7.77325	6.93548	7.78219	7.82876	8.09289	8.20453	7.82142	7.86257	7.70826	7.69389	7.8337	7.92417	7.87383	7.05161	7.69833	8.12832	8.23755	8.05219	8.02499	7.93049	7.9899	7.79236	7.70294	8.01895	7.71436	7.76712
GL50803_3256	8.68242	8.75692	8.74472	8.66255	8.48955	8.44876	8.41812	8.51989	8.54585	8.55712	7.1494	8.8638	8.46471	8.67396	8.45574	8.30157	8.07132	8.10413	8.22368	7.79113	7.96116	7.97299	7.16582	8.21902	8.22638	8.49493	8.2555	8.13763	8.07914	8.00288	8.06536	7.95026	7.93542	6.93379	8.35053
GL50803_3255	4.42866	4.30736	4.35836	4.35769	4.54489	4.38249	4.65197	4.89648	4.98306	5.1272	4.78645	4.0973	4.05546	4.27224	4.20173	4.21625	4.2439	4.31847	4.25396	4.37902	4.60111	4.83226	5.32978	4.0634	3.9888	4.29385	4.35205	4.21958	4.32514	4.47859	4.79135	4.96207	4.80466	5.28688	4.17103
GL50803_17193	6.93931	6.97994	6.96244	7.02798	7.12393	7.10231	7.17347	7.24389	7.24658	7.33859	8.52234	6.87818	6.6814	6.88124	6.97096	6.61962	6.66717	6.68939	6.78001	6.88814	7.09552	7.15214	8.21733	6.60769	6.7684	6.96798	6.8697	6.92541	7.10559	7.05646	7.26583	7.51608	7.49323	7.86678	6.76724
GL50803_32681	8.51877	8.53697	8.68331	8.67696	8.62248	8.58054	8.50074	8.39666	8.37141	8.35564	8.38403	8.54376	8.40086	8.36256	8.66927	7.93923	7.90692	7.72624	7.86275	7.95957	8.16867	8.03483	8.04263	7.80032	8.25536	8.39556	8.26475	8.26073	8.15916	8.25323	8.14408	8.14249	8.40787	8.15719	8.02599
GL50803_13945	6.19847	6.07046	6.27176	6.15246	5.97204	6.02202	5.90531	5.88237	5.96512	6.04778	6.58151	6.31312	6.46798	6.34056	6.51953	6.37742	6.42108	6.42096	6.31312	6.23983	6.22281	6.14346	5.16894	6.49941	6.42317	6.29384	6.29238	6.18781	6.09049	6.11561	5.74566	5.66178	6.06414	5.12949	6.46696
GL50803_21485	6.82532	6.80968	7.24552	8.05336	8.50537	8.8415	9.07528	9.10762	9.16333	8.84082	8.04772	6.90028	6.99068	6.79574	7.25089	7.6592	7.88961	8.12269	8.66296	8.88257	9.06232	8.99481	7.70582	6.86963	6.85931	6.91761	7.88713	8.26738	8.70702	8.96169	9.02904	8.87448	8.98642	7.95152	7.00995
GL50803_13943	7.66976	7.70711	7.68837	7.63961	7.56005	7.50089	7.44806	7.30357	7.3474	7.21257	6.86256	7.70252	7.93839	7.75169	7.77589	7.97546	8.00091	8.10231	8.03455	8.06108	7.77191	7.82495	6.97258	8.11428	7.84208	7.71398	7.68994	7.81442	7.97718	7.81227	7.84393	7.85603	7.52117	6.73638	7.91643
GL50803_13942	6.53289	6.38781	6.26898	6.30092	6.78235	6.9618	7.28358	7.54011	7.541	7.60483	10.831	6.47581	6.63218	6.54969	6.44427	6.8233	6.90091	7.25225	7.18885	7.47538	7.5565	7.67805	10.1143	6.97642	6.68226	6.54636	6.55842	6.8268	7.0663	7.36465	7.36452	7.57107	7.55279	9.46928	6.82536
GL50803_13941	4.9262	4.70394	4.96861	5.00439	5.28677	5.39872	5.47908	5.55394	5.54491	5.53611	7.08492	5.04386	5.14618	4.79977	4.90485	5.28101	5.49783	5.50599	5.69954	5.98423	5.87928	6.01179	6.72506	5.56501	5.00806	4.87499	4.93822	5.3216	5.5233	5.74489	5.6248	5.84621	5.6605	6.27935	5.25005
GL50803_13940	4.36242	4.18289	4.37917	4.29661	4.22626	4.35231	4.23415	3.99781	3.85649	4.10008	5.36508	4.37844	4.5733	4.22544	4.34174	4.45431	4.53715	4.56766	4.6426	4.65069	4.51939	4.29749	4.95239	4.61442	4.03198	4.18723	4.3113	4.45528	4.46668	4.38017	4.34805	4.49778	4.35775	4.80447	4.46647
GL50803_17195	7.74585	7.55523	7.62392	7.67003	7.73991	7.62997	7.87985	7.9878	8.04706	7.93009	8.49365	7.76337	7.68067	7.71969	7.61436	7.78854	7.62359	7.86626	7.86412	7.65024	7.87704	7.83069	8.08833	7.89352	7.71834	7.7334	7.66332	7.66723	7.7526	7.75666	7.87133	7.76635	7.81531	7.28026	7.82822
GL50803_1995	7.30094	7.30845	7.44247	7.52683	7.50688	7.57004	7.48861	7.38117	7.38967	7.16115	6.33274	7.28796	7.18066	7.36549	7.41584	7.58561	7.5864	7.83689	7.93309	7.68054	7.76129	7.74678	6.85733	7.49704	7.37025	7.42301	7.45933	7.66238	7.81056	7.64188	7.81214	7.92223	7.55735	6.09579	7.37491
GL50803_103676	12.0446	11.8361	11.8584	11.9315	11.6387	11.4926	10.9783	10.8166	10.233	10.0992	10.3556	12.2732	7.86755	9.39464	9.20577	8.85162	8.1398	8.23313	10.4414	6.15221	8.00956	9.33306	9.15856	9.16345	8.76817	9.91211	10.486	8.84026	9.14928	9.58762	10.0604	8.8562	9.04086	8.40269	10.3806
GL50803_114751	7.56537	7.66961	7.73552	7.77492	7.8282	7.85937	7.89833	8.00454	7.88747	8.15592	8.23641	7.55116	7.16839	7.36234	7.46675	7.01881	6.92933	6.71816	6.77195	6.91388	7.19258	7.09831	7.47508	6.91826	7.19849	7.26645	7.37288	7.32258	7.02698	7.41988	7.13774	7.19208	7.76352	7.40314	7.00517
GL50803_15377	6.9252	6.80532	6.84303	6.82434	6.72267	6.72795	6.70301	6.61909	6.6953	6.69268	6.9716	6.94894	7.06462	6.88061	7.00153	6.85511	6.82787	6.75697	6.74076	6.69386	6.79639	6.66411	6.17715	7.02431	7.02982	7.02928	7.06728	7.01711	6.90965	6.87015	6.74239	6.73375	6.86348	6.39281	7.11886
GL50803_15376	8.65867	8.95678	8.95072	8.87444	8.88445	8.81178	8.89304	8.77744	8.71431	8.65521	8.1062	8.6908	8.59353	8.75049	8.7399	8.13628	8.0386	7.79538	7.83172	7.8765	8.21327	8.06492	8.13395	7.94787	8.4368	8.54876	8.39032	8.30354	8.0758	8.41732	8.18511	8.16973	8.73287	8.26991	8.11721
GL50803_11220	6.10981	6.07529	6.08178	6.29089	6.55028	6.67163	7.19764	7.51446	7.56813	7.69227	7.69194	6.15724	6.23259	6.17907	6.24755	6.50473	6.5514	6.76422	6.81679	6.92405	7.23416	7.40109	7.51923	6.50095	6.27917	6.18105	6.31971	6.73738	7.04231	7.28784	7.4077	7.7594	7.61584	7.01367	6.33219
GL50803_39587	7.0437	7.30537	7.28464	7.21114	7.0304	6.93354	6.81248	6.67917	6.75149	6.77977	6.92119	7.05009	6.9233	7.15013	7.25712	6.59423	6.52474	6.38039	6.36469	6.57344	6.47688	6.51445	7.06829	6.32352	6.89131	6.95359	6.71997	6.60285	6.62502	6.58269	6.57428	6.73445	6.67663	7.30071	6.55791
GL50803_11218	1.81338	1.73137	2.21632	2.16182	2.17287	2.44065	2.27275	2.38837	2.37519	2.56529	0.869826	1.25453	1.65657	1.76237	2.12476	1.63456	1.85832	2.05745	2.16989	2.0464	1.92328	2.06919	0.334422	1.67577	1.98639	2.17079	2.15268	2.20704	2.16231	2.37945	1.50552	2.00942	2.31259	2.15094	1.50227
GL50803_17198	7.94404	8.03255	7.99549	7.98136	7.78779	7.60182	7.09265	6.59719	6.66808	6.32761	7.76178	8.01059	8.24916	7.9661	7.89095	7.64141	7.51631	6.86934	6.6802	6.15509	5.94836	5.62731	8.71653	7.31253	8.08387	7.87116	7.71855	7.48608	6.70759	6.28072	6.04009	5.72734	5.74036	9.04952	7.89021
GL50803_17199	7.21633	7.294	7.32675	7.2235	7.08818	6.95512	6.91838	6.96597	6.91556	7.02911	6.94963	7.26041	6.74628	7.08227	6.97678	6.72602	6.50879	6.41428	6.30908	6.22346	6.44359	6.42089	7.0248	6.59261	6.72498	6.94089	6.84266	6.7522	6.51638	6.62963	6.49418	6.64078	6.7153	7.40914	6.74848
GL50803_11214	7.54926	7.63726	7.54786	7.47558	7.35259	7.14195	7.11665	6.99797	7.10609	7.09242	7.8952	7.56189	7.52413	7.556	7.44005	7.20873	7.01678	6.82153	6.695	6.73423	6.64276	6.60704	7.0319	6.84621	7.23498	7.26888	6.96651	6.87533	6.8069	6.6303	6.76901	6.88632	6.65192	6.95154	7.08754
GL50803_17200	4.94229	4.9264	4.80527	4.79319	4.86417	4.85816	4.83671	4.92942	5.00716	5.13815	3.99657	4.95015	5.0075	4.81302	4.81418	4.65587	4.89829	4.89013	4.82361	5.02489	4.99136	4.95105	4.07195	4.92541	4.91425	4.56068	4.65411	4.58082	4.62956	4.8466	4.86206	4.86443	4.90127	4.10022	4.87772
GL50803_93938	9.3776	9.27907	9.39183	9.43464	9.17641	9.15616	8.93985	8.76906	8.73856	8.55388	7.54455	9.53289	8.9149	9.0076	9.10353	8.94005	8.87678	8.84869	9.22732	8.508	8.69006	8.74035	8.02351	8.89935	8.64355	8.93006	8.97662	8.83031	8.84245	8.71306	8.93691	8.72772	8.44183	7.25571	8.95171
GL50803_92645	8.00533	7.17791	7.49642	7.75641	7.54226	7.35606	7.19176	6.92886	6.92766	6.80462	7.02222	7.97058	8.23133	7.47913	7.78851	7.78916	7.80665	7.64295	7.39274	7.16837	7.03975	7.00408	9.56147	7.71766	7.12811	7.59814	7.41369	7.59073	7.25603	7.03539	7.08254	7.00855	6.88545	9.89562	8.15935
GL50803_11209	5.82881	6.33332	6.14691	6.0662	6.50377	6.54171	7.13311	7.6082	7.82384	7.98648	7.78282	5.77127	5.9292	6.33138	6.30417	6.53692	6.60327	6.71816	6.63649	6.71939	6.98539	7.03071	8.04122	6.15968	6.44729	6.36712	6.30092	6.34975	6.4346	6.82993	6.74863	6.92284	7.05658	8.334	5.99384
GL50803_11207	6.55748	6.75646	6.66494	6.48623	6.44753	6.35748	6.22434	6.07243	6.24296	6.20883	5.58825	6.68808	6.71353	6.84944	6.82381	6.90986	7.02461	6.98773	6.71042	6.67793	6.40315	6.4667	5.66566	6.87736	6.9499	6.9566	6.96949	6.87081	6.68486	6.46382	6.58059	6.57503	6.44887	6.09791	6.87127
GL50803_60401	5.91696	5.83973	5.83307	5.80622	5.72107	5.63349	5.5467	5.3779	5.39857	5.38952	4.87385	5.85897	5.9222	5.91972	5.92419	6.00613	6.05901	6.01454	5.92769	5.80757	5.74765	5.62109	5.06195	6.05248	6.02937	6.11795	6.06283	5.9635	5.89467	5.80777	5.80549	5.83964	5.5639	5.38765	6.06999
GL50803_15369	2.88369	2.34195	2.71887	2.56847	3.0159	2.9721	3.39326	3.50752	3.68786	3.80711	2.97462	2.77537	2.87434	2.86751	2.96494	2.79984	2.9972	3.1878	3.22362	3.17161	3.87247	3.64865	3.32248	3.27308	2.9222	2.93727	2.90629	2.88731	2.77205	3.365	3.28507	3.27419	3.63374	3.4983	2.9754
GL50803_11204	4.53861	4.49235	4.52164	4.64354	4.83106	4.84232	5.07904	5.07917	5.36676	5.27841	5.10458	4.51888	4.65442	4.81566	4.81158	4.88248	4.98708	5.15152	5.04646	5.26422	5.19669	5.32463	4.76726	4.71601	4.84331	4.80994	4.86332	4.81671	4.95643	5.12633	5.07548	5.13308	5.10849	5.55486	4.72558
GL50803_15368	7.09859	6.93939	7.06069	6.98438	7.06819	7.09686	7.21997	7.41957	7.5187	7.5621	6.90883	7.00943	7.0029	6.96195	7.00096	7.02357	7.04784	6.96733	6.99541	6.91275	7.00053	6.92362	6.79188	7.14442	7.11913	7.06429	7.06673	7.04662	7.11062	7.103	7.17802	7.04614	6.98659	6.96907	7.13995
GL50803_15367	4.35443	4.36381	4.41487	4.54568	4.23894	4.37651	4.37232	4.49417	4.49333	4.56256	4.10892	4.45549	4.61443	4.51205	4.56514	4.59461	4.69751	4.65528	4.5701	4.63976	4.54274	4.48381	4.14716	4.76809	4.81886	4.51896	4.48789	4.59028	4.58404	4.65995	4.59222	4.53079	4.48151	4.45896	4.62695
GL50803_11201	2.79194	2.78151	3.02639	2.87344	3.20006	3.14167	3.26467	3.21047	3.30524	3.49696	3.48822	2.69676	2.60958	2.66031	3.02905	2.6546	2.94041	2.9405	2.93957	2.93293	3.1921	3.14092	3.42965	2.80953	2.62789	2.86737	3.161	3.01456	2.84139	3.17992	2.98904	2.95223	3.22271	3.71327	2.76525
GL50803_11200	5.68636	5.53189	5.81791	5.97027	6.06634	6.21158	6.12906	6.10051	6.19323	6.02239	7.08217	5.4572	5.65567	5.63049	5.5697	5.61133	5.52567	5.52317	5.70108	5.71561	5.66797	5.50431	7.31189	5.18877	5.37296	5.4523	5.54331	5.60439	5.79331	5.53363	5.83039	5.76529	5.48136	7.99438	5.24032
GL50803_17202	6.90892	6.9915	7.297	7.73766	7.98663	8.1147	8.23003	8.20847	8.20478	8.19687	9.32434	7.0279	6.94419	6.98262	7.293	6.87691	6.86921	6.76619	6.90518	6.94472	7.35404	7.07632	8.29734	6.3613	6.78174	7.03726	7.2857	7.40173	7.06216	7.42837	7.13774	7.03353	7.64975	9.01787	6.57802
GL50803_11196	4.30963	4.13271	4.13806	4.33617	4.49995	4.62056	4.76457	4.57645	4.45563	4.60528	5.14731	4.30463	4.52789	4.15228	4.2057	4.51268	4.48137	4.55557	4.40939	4.89996	4.64494	4.77459	4.4484	4.57987	4.59817	4.40375	4.39522	4.52271	4.37276	4.57351	4.28425	4.4011	4.6277	4.66229	4.27955
GL50803_17203	6.19959	5.95314	5.9782	5.97307	6.47815	6.53187	6.82962	6.99259	7.09131	7.17849	9.23245	6.2894	6.3442	5.98672	6.08471	6.40283	6.44606	6.60608	6.48967	6.71939	6.78174	6.8337	8.86395	6.67675	6.29964	6.13611	6.40492	6.36177	6.31518	6.57714	6.49492	6.75695	6.73493	8.20482	6.44805
GL50803_92618	2.33616	2.61873	2.79825	2.83713	4.1567	4.72474	5.13733	6.1774	5.45699	5.95792	11.32	2.43141	2.52582	2.67199	2.76431	3.13322	3.36707	3.83889	4.22849	4.30488	4.94202	5.41367	10.8084	2.7794	2.8076	3.05873	3.28861	3.84063	4.27589	4.29495	4.86436	5.81438	5.9736	9.99237	2.82725
GL50803_17205	6.9007	7.30021	7.32541	7.33294	7.66634	7.81137	8.02283	8.04729	8.12945	8.07985	10.7468	7.0786	7.26103	7.30114	7.29113	7.69744	7.89682	8.03883	8.04827	8.30427	8.30466	8.34537	10.5033	7.73739	7.72526	7.56895	7.73999	7.95684	8.17963	8.28757	8.1874	8.37321	8.419	10.7557	7.38893
GL50803_14901	6.7219	7.08142	7.0751	7.03535	7.35889	7.30472	7.4701	7.40478	7.47225	7.57961	8.72016	6.69748	6.77442	7.10345	7.12663	7.00977	7.00348	7.02439	7.00231	7.22154	7.66348	7.68552	7.68434	6.8962	7.19375	7.15457	7.22117	7.27693	7.16959	7.661	7.38907	7.66217	8.13481	7.83207	6.65634
GL50803_9210	4.9262	5.27231	5.34945	5.39832	5.68447	5.59191	5.9709	6.06561	6.2018	6.27068	7.25818	4.9453	5.08479	5.36866	5.33805	5.40622	5.31047	5.471	5.25635	5.64497	6.06816	6.0938	6.36665	5.31492	5.39628	5.35714	5.33551	5.53586	5.61385	6.06106	5.77161	6.147	6.51221	6.29612	5.02859
GL50803_23699	6.9847	6.95981	6.7149	6.88414	6.99347	7.01317	7.08474	7.10109	7.19173	7.25176	9.67795	6.78423	6.61347	6.74411	6.72289	6.6356	6.53573	6.75763	6.76754	6.88294	7.08363	7.12052	8.45577	6.64019	6.70977	6.65556	6.71501	6.83478	7.13942	7.11022	7.41242	7.74575	7.50904	8.46538	6.65878
GL50803_9213	5.0723	5.14694	5.03893	5.00439	5.06976	5.07078	4.92682	4.88619	4.99406	4.97057	4.74994	5.05741	5.06797	5.00071	4.96227	4.69355	4.67779	4.89734	4.95882	5.00161	4.95203	4.78576	4.31498	4.88354	4.86735	4.82845	4.85304	4.68162	4.88316	4.92068	4.97058	5.13951	5.10017	4.49812	4.76684
GL50803_16460	6.71645	7.03375	7.12753	7.1278	6.90873	6.95712	6.76176	6.58611	6.60058	6.48888	7.11214	6.74221	6.78989	6.88501	7.08684	6.41657	6.44022	6.03972	6.25649	6.28699	6.35024	6.38464	6.15129	6.13412	6.68564	6.7851	6.74452	6.51036	6.3665	6.34491	6.11921	6.29271	6.35139	6.2831	6.32223
GL50803_14903	6.36891	6.41478	6.4058	6.37982	6.3091	6.20877	6.2118	6.07583	6.11879	6.06988	6.12218	6.28653	6.46316	6.45315	6.48157	6.29229	6.32055	6.18911	6.12808	6.13189	6.0739	6.04933	6.08998	6.04617	6.50742	6.48767	6.22018	6.20022	6.18404	5.97622	6.12497	6.20236	5.98608	6.2831	6.34208
GL50803_92602	7.3936	7.54655	7.65517	7.63829	7.59046	7.53577	7.44188	7.40838	7.49489	7.56582	7.12199	7.37213	7.17429	7.25771	7.54988	7.0513	6.98454	6.78444	6.8175	6.88526	7.19152	7.08086	6.96666	6.89913	7.12362	7.33419	7.35841	7.20074	7.01041	7.2522	7.07413	7.07217	7.48246	7.66215	7.02609
GL50803_14905	6.49156	6.44126	6.42343	6.42231	5.99838	6.03474	5.87014	5.91436	5.82181	5.85436	9.89356	6.50741	6.60475	6.39178	6.46014	6.55603	6.55815	6.52077	6.37537	6.3957	6.04965	5.88128	8.3085	6.56785	6.43608	6.1509	6.35386	6.19196	6.42172	6.05609	6.14212	6.00149	5.68437	7.49393	6.47666
GL50803_9219	5.15749	5.06905	5.12767	5.11719	4.85871	4.69779	4.61728	4.64211	4.47146	4.55713	8.91512	5.26236	5.44708	5.08394	5.22333	5.32282	5.30083	5.28205	5.25214	5.26777	4.89354	4.64573	7.35218	5.32016	5.10021	4.91266	5.21417	5.14241	5.18323	4.81162	4.82478	4.61941	4.28248	6.57785	5.30555
GL50803_14906	7.33435	7.1751	7.10195	7.01314	6.83688	6.80128	6.6653	6.70208	6.56855	6.73478	8.68766	7.29465	7.01612	6.9972	6.99581	6.63422	6.43068	6.35183	6.4753	6.08029	6.12784	6.15857	7.06829	6.60769	6.65628	6.77081	6.82698	6.53833	6.34704	6.24883	6.44896	6.31563	6.28774	6.81604	6.88955
GL50803_23694	5.23576	5.07872	4.99243	4.85502	4.85322	4.79374	4.69142	4.73676	4.70633	4.90369	4.32905	5.33275	5.34255	5.07737	5.05317	5.32282	5.15693	5.07732	4.81222	4.54924	4.66636	4.65794	4.10466	5.41793	5.23565	5.20959	5.28857	5.16158	4.9362	4.83271	4.84354	4.84093	4.73377	4.10868	5.48385
GL50803_137689	9.04036	9.24338	9.1978	9.1182	9.05321	8.95413	8.80523	8.69235	8.59274	8.641	8.31972	9.0369	8.80054	9.12112	9.09433	8.87493	8.81353	8.74399	8.75893	8.77575	8.87294	8.87596	8.76807	8.8715	9.11468	9.15575	9.1084	9.00125	8.85703	8.94404	8.93172	9.08404	9.27593	8.9406	8.84712
GL50803_5593	10.333	10.2479	10.2903	10.1425	9.83582	9.6541	9.43305	9.23101	9.25753	9.13655	7.97792	10.261	9.14422	9.60413	9.57826	9.45073	9.13729	9.31545	10.003	8.43838	8.99013	9.55583	8.96131	9.50757	9.30525	9.81557	9.83794	9.28861	9.38641	9.36498	9.59824	9.33785	9.19822	7.46786	9.87841
GL50803_16701	7.90932	7.96443	8.11426	8.04708	8.16302	8.17256	8.30302	8.51656	8.48397	8.61265	7.06556	7.95408	7.87634	8.00356	8.08198	7.88909	7.89496	7.87541	7.87921	8.01849	8.07738	8.07434	7.24865	7.89674	7.92115	7.96469	8.02123	8.02615	7.94182	8.13654	7.95161	7.94414	8.2557	7.89517	7.81653
GL50803_16700	5.15519	5.13309	5.14902	5.08142	5.16584	5.17791	5.25295	5.30448	5.51619	5.59294	4.98796	5.1233	5.32319	5.27028	5.20561	5.25244	5.30887	5.18724	5.15184	5.36882	5.38936	5.2819	4.8403	5.18303	5.20956	5.21362	5.28857	5.28517	5.22646	5.26551	5.29241	5.39755	5.4208	5.28315	5.22724
GL50803_5171	6.57823	6.43468	6.33169	6.26493	6.30207	6.23216	6.31913	6.26635	6.35559	6.3529	7.24922	6.6075	6.59083	6.63496	6.3982	6.64731	6.60458	6.68176	6.67314	6.5648	6.51364	6.59202	6.5441	6.95355	6.73612	6.54716	6.51259	6.54888	6.52092	6.36435	6.57709	6.56311	6.35577	6.30166	6.79521
GL50803_121046	1.53073	1.73137	1.72526	1.62221	1.48649	1.4903	1.58049	1.80312	1.72228	1.92145	5.79273	1.45889	-0.0161104	0.888236	0.744137	0.570687	0.158762	0.475756	1.55668	0.196616	1.199	1.31939	4.4484	0.542122	0.334952	0.975863	0.93601	0.834454	0.714864	1.71096	0.666677	0.649026	1.73546	3.72432	1.4356
GL50803_16699	8.38778	8.42749	8.4635	8.54342	8.43779	8.41436	8.31592	8.25394	8.13094	8.18526	7.68168	8.28461	7.79434	8.15481	8.15357	7.84074	7.70894	7.67055	7.6783	7.63793	7.85122	7.86727	7.54429	7.6661	8.07254	8.04321	8.15389	7.99087	7.99468	8.02493	8.08026	8.21969	8.22444	7.58542	7.8374
GL50803_102978	4.0273	3.84613	4.11963	4.15138	4.17	4.20473	3.9984	3.99781	3.76696	3.85215	4.45344	4.16977	3.67708	3.91734	3.88282	3.93549	3.89264	3.99931	4.02162	3.70984	3.99847	3.97552	3.76594	3.88624	3.81182	3.81526	4.03468	3.95734	4.13701	4.06083	4.16627	4.16914	4.28248	3.91003	3.94204
GL50803_5180	4.89346	4.69139	4.89106	4.85199	4.78858	4.80715	4.70525	4.59867	4.62656	4.54894	3.37293	4.8395	4.8318	4.82615	4.83483	4.85661	4.64008	4.92581	4.84332	4.45578	4.71709	4.77459	4.26761	4.80096	4.65175	4.68199	4.60898	4.59968	4.62956	4.78061	4.79618	4.91783	4.85253	3.75698	4.73947
GL50803_92673	4.18892	4.37169	4.55402	4.83981	5.07448	5.16407	4.93857	4.78185	4.68204	4.62098	3.64553	4.54155	4.26554	4.43532	4.27154	4.38364	4.45265	4.44844	4.75688	4.70411	4.89354	4.70867	3.73841	4.25805	4.41785	4.13719	4.70361	4.81671	4.75809	5.3246	4.81293	5.13308	5.64341	4.3055	4.30778
GL50803_5183	7.03809	6.95325	6.77402	6.96348	6.60354	6.57954	6.2176	6.09046	5.95502	5.82641	6.4426	7.29131	6.20785	6.53777	6.5781	6.30799	6.11323	6.02992	6.30299	5.86146	6.10673	6.4191	6.72857	6.22728	6.20188	6.27564	6.50522	6.16054	6.40136	6.23921	6.48151	6.65357	6.41738	6.61692	6.35642
GL50803_4447	7.64456	7.68789	7.74406	7.56248	7.51037	7.53039	7.46726	7.29679	7.37038	7.29725	7.05157	7.64947	7.47114	7.60823	7.44467	7.35275	7.29677	7.48131	7.42813	7.19986	7.29535	7.21542	7.23271	7.37011	7.42877	7.5807	7.38587	7.33389	7.31729	7.16759	7.31329	7.3659	7.19496	6.55327	7.3236
GL50803_15906	5.91152	5.64033	5.77342	5.78255	5.74793	5.61158	5.49986	5.3779	5.28311	5.21602	4.40144	5.9009	5.08688	5.3138	5.35244	5.22146	5.19036	5.22018	5.47788	4.96924	5.25643	5.29759	5.37071	5.18686	5.03378	5.3535	5.39344	5.30062	5.21157	5.30125	5.39294	5.39576	5.15746	4.45896	5.38573
GL50803_86676	10.3962	10.2105	10.146	10.2131	9.63484	9.30046	9.02075	8.64756	8.62672	8.42529	7.96056	10.9068	9.89238	9.91702	9.88229	10.0765	9.83828	9.94217	10.1233	9.01886	9.04796	9.19988	8.32652	10.3287	9.72391	10.1003	10.0002	9.91125	9.68561	9.41758	9.5633	8.99959	8.69898	6.92184	10.5973
GL50803_86680	8.06718	8.13429	8.10336	8.00747	7.58633	7.38293	7.0661	6.71811	6.56117	6.47383	5.34381	8.3218	8.18722	8.16104	8.27987	7.91523	7.64088	7.36917	7.20417	7.05985	6.84215	6.7029	5.93489	7.60513	7.9177	8.16163	7.90871	7.76932	7.44173	7.07771	7.14011	6.84557	6.8147	6.1825	7.99906
GL50803_86681	8.54864	8.65599	8.55033	8.54506	8.14993	8.0076	7.83966	7.76309	7.79015	7.82838	6.58798	8.64928	7.56928	7.96581	7.74554	7.51635	7.28582	7.11217	7.24708	6.83046	7.00113	7.10166	6.63648	7.28554	7.35885	7.5717	7.37423	7.27106	7.18967	7.12501	7.18677	7.2537	6.98772	6.16232	7.36113
GL50803_86683	7.85474	8.28127	8.4108	8.37662	8.45646	8.5087	8.46927	8.48899	8.50432	8.50007	7.18402	7.86026	7.27576	7.81627	7.77087	7.40032	7.3311	7.32175	7.60555	7.33892	7.60841	7.66828	6.85413	6.93942	7.54735	7.76567	7.64332	7.46052	7.64033	7.88473	7.80139	7.9609	7.84893	6.65641	7.08482
GL50803_16307	6.50878	6.78848	6.78478	6.67205	6.65884	6.5466	6.41397	6.31797	6.29104	6.23627	5.20912	6.60596	5.98515	6.35331	6.3253	5.88692	5.75703	5.61054	5.74216	5.58359	5.89621	5.79276	5.61357	5.69982	6.07343	6.19233	6.31316	6.07553	5.86048	6.19284	5.81977	5.97654	6.15134	6.36129	5.85512
GL50803_9173	7.34347	7.21619	7.28464	7.34646	7.47374	7.44216	7.6031	7.7645	7.83978	7.90573	6.66964	7.1945	6.61202	6.7013	6.83666	6.34988	6.35433	6.28563	6.55174	6.49073	7.03858	7.21077	7.13051	6.40882	6.35509	6.57092	6.54889	6.4371	6.56625	7.13448	6.94164	7.13472	7.17874	6.80306	6.60607
GL50803_9174	7.23876	6.90651	7.07749	7.11901	7.03465	6.94032	6.80415	6.85232	6.8703	6.89348	6.72593	7.11522	6.90979	6.83588	6.80627	6.67515	6.56488	6.44083	6.33715	6.31987	6.30413	6.07799	8.23468	6.41944	6.20188	6.40109	6.42416	6.38279	6.35299	6.25578	6.37674	6.4886	6.17334	8.35682	6.50944
GL50803_9175	5.44037	5.35222	5.39357	5.48692	5.69217	5.81484	5.79711	6.07696	5.96736	6.14781	4.35965	5.36397	5.33378	5.26258	5.29026	5.19356	5.0517	5.18724	5.38103	5.49391	5.56907	5.58161	4.9343	5.16566	5.28468	5.179	5.046	5.34415	5.50663	5.598	5.53243	5.59467	5.65909	4.71865	5.10028
GL50803_101955	7.63593	7.453	7.46332	7.35236	7.26852	7.30551	7.17546	7.19002	7.152	7.2357	6.40641	7.67606	7.66398	7.48742	7.5215	7.1077	6.97498	6.79541	6.76974	6.60608	6.63269	6.45974	8.02494	6.97697	7.18946	7.31556	7.14733	7.01067	6.82841	6.90872	6.93619	6.94567	6.75959	8.50998	7.39039
GL50803_14891	6.24246	6.06439	6.11161	6.04646	5.90202	5.92078	5.77499	5.66792	5.7677	5.82302	6.01858	6.30463	6.47597	6.15118	6.11457	6.31923	6.2346	6.23154	6.19207	6.26494	6.03443	5.90707	5.88554	6.33565	6.28275	6.11795	6.09155	6.14029	6.10768	5.84053	6.04111	6.13417	5.70648	5.68219	6.55203
GL50803_9180	4.21123	4.42194	4.27201	4.39564	4.51393	4.44674	4.26809	4.14312	4.34997	4.21143	3.74162	4.54155	4.39931	4.36869	4.39832	4.2273	4.22024	4.42203	4.39419	4.18224	4.1711	4.12364	3.68172	4.1246	4.48775	4.50587	4.49452	4.5585	4.43498	4.32832	4.26698	4.43637	4.13541	3.90031	4.401
GL50803_9181	6.08465	5.70419	5.70297	5.79365	5.83123	5.83535	6.00036	5.90292	5.85959	5.87086	5.57266	5.93065	5.70138	5.61696	5.6359	5.42873	5.31526	5.34665	5.39254	5.31145	5.54449	5.62731	5.22457	5.47388	5.56746	5.63016	5.49947	5.55048	5.6789	5.63715	5.69362	5.7639	5.8071	4.9575	5.58344
GL50803_9183	11.3994	11.3342	11.2615	11.2005	11.421	11.3226	11.1761	10.8442	10.6192	10.3663	8.89567	11.2548	9.78847	10.2059	9.99757	9.35983	9.21768	9.2349	9.57466	9.4589	10.056	9.91143	9.41347	9.502	9.61072	9.78797	9.66617	9.62192	9.77299	10.4163	10.2818	10.0535	10.6805	9.38277	9.50114
GL50803_9184	5.99619	6.22321	6.33302	6.52669	6.96513	7.05967	7.36512	7.51613	7.50876	7.66413	8.18479	6.09949	5.80018	6.003	6.02308	6.02314	6.02429	6.13729	6.25123	6.43573	6.97316	7.02543	6.85092	5.8095	5.88494	6.06094	6.24694	6.53098	6.65834	7.12549	6.92082	7.37457	7.55925	6.86305	5.80428
GL50803_16318	9.27503	10.8048	10.8227	10.8443	10.8843	10.8879	10.9331	11.0492	10.8966	10.8316	11.3567	9.31206	8.02619	9.99857	9.74152	9.12792	8.79878	8.59665	8.92603	8.86186	9.75292	9.7749	12.0964	7.63839	9.19927	9.48715	9.23411	8.99874	9.02039	9.73778	9.51265	9.61792	10.3323	12.2063	7.79924
GL50803_27652	4.66684	4.62365	4.86917	5.53494	6.04965	6.3746	6.42488	6.55072	6.47348	6.41501	5.54895	4.36397	4.22438	4.30636	4.59571	4.94851	5.07073	5.54322	5.97185	6.02048	6.29237	6.42447	5.55559	3.70041	4.14642	4.38243	5.29238	5.94642	6.40136	6.43347	6.80176	7.06486	6.83366	5.51085	3.93803
GL50803_16317	7.78468	8.14065	8.28864	8.22593	8.14067	7.9961	7.83401	7.66233	7.72395	7.62541	6.57108	7.85316	7.84304	8.07238	8.24896	7.66191	7.58309	7.28833	7.37447	7.38585	7.47039	7.39336	6.48734	7.18042	7.84813	8.11741	7.95153	7.93101	7.66138	7.80606	7.49409	7.38499	7.79643	7.05256	7.45318
GL50803_101948	5.99876	6.27354	6.35551	6.50274	6.47993	6.3247	6.31913	6.13567	6.11879	6.10473	5.44432	6.12758	6.31331	6.30349	6.53302	6.06583	6.01352	5.7471	5.69954	5.87317	6.0403	5.78721	5.66566	5.75118	6.05157	6.41691	6.25575	6.28617	5.83155	6.07686	5.77161	5.5422	6.16538	6.24523	5.90935
GL50803_13886	4.76059	5.08832	4.58121	4.49996	4.55844	4.53537	4.40997	4.24727	4.39383	4.23202	4.7999	4.56387	4.44563	4.89005	4.58964	4.70149	4.69751	4.60335	4.63293	4.63702	4.62006	4.43501	5.1057	4.45835	5.26852	4.4317	4.55606	4.64577	4.68989	4.62007	4.69134	4.87733	4.51947	5.01714	4.69978
GL50803_16315	5.44603	5.49084	5.80067	5.74222	5.65639	5.60732	5.60393	5.4284	5.44742	5.34294	3.66527	5.76027	5.97954	5.90495	6.0197	6.09528	6.39036	6.3718	6.17772	6.48005	6.19465	6.2154	4.74668	6.26129	6.13513	6.08863	6.10245	6.11757	6.1157	6.1012	5.94014	5.68836	5.90236	5.30907	6.10884
GL50803_137617	10.5469	10.1457	9.94065	10.0821	10.3497	10.5047	10.553	10.7375	10.3737	10.5055	11.2402	11.5636	8.61196	9.0289	8.66495	8.5225	8.42292	8.52866	8.9483	8.54653	9.02045	9.33354	11.2826	9.36288	9.08321	9.09437	9.1284	8.98864	9.25393	9.58891	9.72656	10.0591	10.0571	12.107	10.5625
GL50803_115158	5.86303	5.72281	5.791	5.8735	6.06397	6.19297	6.18343	6.06447	6.07282	5.93298	5.70964	5.52377	5.76539	5.70771	5.60016	5.91908	6.12146	6.41093	6.44152	6.55029	6.54702	6.55335	6.46861	6.2347	6.04947	6.00855	6.02896	6.18573	6.4545	6.50162	6.6069	6.63091	6.49088	7.52271	5.76749
GL50803_14478	3.83955	4.24432	4.33193	4.55689	4.90717	4.90465	4.88125	4.70784	4.82691	4.77861	2.82473	4.19041	4.21295	4.26068	4.31994	4.70413	4.75039	5.008	5.03915	5.20244	5.20717	5.0768	3.49691	4.55933	4.85056	4.55116	4.94065	5.13812	5.01977	5.23943	4.74969	5.09385	5.28599	4.349	4.32323
GL50803_137685	7.78728	8.07785	7.97642	7.81864	7.60808	7.45215	7.12645	6.80805	6.82973	6.63779	6.74461	7.95287	8.21471	8.30019	8.23713	7.82264	7.63514	7.29107	7.08446	6.94971	6.85287	6.6799	8.86275	7.25986	7.98681	8.13956	7.75664	7.61488	7.24556	6.97028	6.99243	7.00032	6.84304	9.17768	7.74004
GL50803_115159	7.97501	8.07	8.10959	7.95584	7.64902	7.48868	7.31458	7.18688	7.26123	7.11754	8.9855	8.13984	8.3812	8.38225	8.35348	8.41847	8.48255	8.47509	8.23278	8.32658	7.91589	7.92553	9.88865	8.52433	8.36727	8.32374	8.12158	8.11486	8.02268	7.67857	7.71297	7.55752	7.36575	10.7009	8.47782
GL50803_7552	5.68318	5.74727	5.86107	5.92486	5.75383	5.73132	5.66889	5.78744	5.73397	5.791	6.36175	5.85251	5.70002	5.72603	5.94926	5.41268	5.45068	5.31651	5.35968	5.17622	5.15184	5.29759	5.20459	5.44698	5.67761	5.79791	5.88493	5.63213	5.48202	5.51346	5.41819	5.39037	5.56542	5.14603	5.62267
GL50803_14480	5.98588	6.02742	6.13931	6.13012	6.10725	6.00789	6.00931	5.93696	5.93575	6.01845	8.16326	6.05178	6.19628	6.09481	6.26857	5.99	5.97365	5.86451	5.84211	5.97122	5.93581	5.90962	7.07656	6.01741	5.99159	6.28812	6.28952	6.2852	5.90627	6.09345	5.70135	5.6825	6.10736	6.87301	6.1397
GL50803_7555	6.34893	6.38294	6.42843	6.42128	6.54008	6.6028	6.5451	6.49257	6.49145	6.56593	7.45314	6.43402	6.36501	6.36505	6.35776	6.57274	6.62853	6.78379	6.68333	6.93638	6.94402	7.03364	6.86053	6.61979	6.51048	6.54557	6.56395	6.69635	6.74814	6.92409	6.88674	7.04329	7.02778	6.79784	6.57027
GL50803_7556	7.83116	7.88262	7.88346	7.81086	7.59991	7.52926	7.25565	7.09552	7.11469	7.04131	8.26741	7.97117	7.9873	7.93402	7.92354	7.85536	7.88773	7.65576	7.58354	7.21328	7.05723	6.8168	9.52644	7.83278	8.12334	7.83336	7.71642	7.63254	7.32769	6.94306	7.0496	6.69203	6.59009	9.83429	8.05125
GL50803_14481	7.51962	7.43664	7.47363	7.40292	7.3521	7.3034	7.30235	7.1994	7.30606	7.21946	9.96098	7.53833	7.67929	7.41325	7.4684	7.60127	7.66048	7.76779	7.70085	7.84147	7.59929	7.51153	9.60523	7.71567	7.46978	7.37883	7.38587	7.36729	7.49073	7.29419	7.48441	7.38137	7.09637	9.20086	7.62601
GL50803_7559	6.49156	6.48463	6.63174	6.85719	6.89677	6.96546	6.9355	6.86939	6.9408	6.78559	5.54629	6.5343	6.6011	6.43698	6.52033	6.70444	6.86376	6.94606	7.10269	7.13374	7.05897	6.99389	5.62865	6.61908	6.69037	6.64291	6.86267	6.95256	7.04231	7.05147	7.00967	7.14114	6.79871	5.99443	6.77793
GL50803_14482	7.0781	7.17171	7.05342	7.0253	7.10212	7.04999	7.07198	7.11106	7.12423	7.03449	8.94948	7.01869	7.17626	7.30255	7.25616	7.20314	7.2132	7.3842	7.29439	7.31422	7.28697	7.34323	8.89778	7.1785	7.44084	7.32583	7.15834	7.16795	7.19725	7.16205	7.41556	7.58882	7.2259	8.56519	7.20018
GL50803_7562	6.08465	6.10871	6.15297	6.12134	6.47726	6.45727	6.63527	6.70793	6.71139	6.70256	7.45739	5.96699	6.00075	5.95242	6.03316	6.07503	5.97869	6.31821	6.41166	6.3318	6.64122	6.87218	6.65317	6.04406	6.0755	5.9542	5.80714	5.96593	6.27009	6.51834	6.57077	6.92222	6.62024	6.29612	5.79212
GL50803_16342	7.20858	7.6764	7.73501	7.66917	7.39001	7.3144	7.21321	7.22361	7.09234	7.13815	9.86224	7.4842	7.63358	7.69236	7.94655	7.45069	7.38149	7.03041	6.99352	6.96675	7.10452	7.20714	9.37264	7.07273	7.75424	7.8169	7.5769	7.38914	7.00556	7.21163	6.78729	6.89332	7.31583	8.72951	7.33432
GL50803_16343	10.5603	10.6034	10.5636	10.4987	9.93905	9.82975	9.4079	9.19134	9.02495	8.91898	10.9736	10.7379	9.95654	10.2096	10.3927	9.89281	9.70917	9.37495	9.38067	8.7928	8.86849	8.62194	8.84067	9.70005	9.93575	10.0853	10.139	9.64952	9.41532	9.10808	9.23932	8.78426	8.66921	8.22101	10.1863
GL50803_95023	6.48425	6.36922	6.3828	6.46457	6.55621	6.49044	6.44974	6.27624	6.32018	6.26902	5.82599	6.34477	6.49419	6.29313	6.46677	6.24596	6.35433	6.28746	6.24807	6.33857	6.32448	6.16285	5.79823	6.17616	6.23366	6.36622	6.30469	6.27154	6.29502	6.28242	6.29476	6.10158	6.20474	6.35241	6.35191
GL50803_19189	4.52086	4.67873	4.50281	4.64003	4.83106	4.77414	4.99821	5.20245	5.34114	5.2143	5.24563	4.69676	4.72587	4.71763	4.70628	4.99882	5.02659	5.15554	5.10828	5.22455	5.27249	5.3208	5.01109	4.96834	4.90963	4.66148	4.79511	4.73377	4.74004	4.90307	5.04945	5.14165	4.96456	4.63327	4.80255
GL50803_2616	4.2332	4.23137	4.26644	4.16609	3.98169	4.07276	4.1994	4.0215	4.12423	4.16934	6.94359	4.36033	4.39931	3.95128	4.01534	4.32997	4.43807	4.43199	4.48662	4.59521	4.422	4.5735	6.68956	4.53549	3.92609	3.80995	3.75426	3.91279	3.95679	3.89698	3.93655	4.10042	3.71232	5.86808	4.16761
GL50803_13075	7.35704	7.78927	7.5071	7.53865	7.58261	7.56303	7.39742	7.28117	7.33793	7.19869	6.50964	7.35897	7.48229	7.58525	7.44719	7.60762	7.61843	7.56703	7.7363	7.55095	7.42354	7.38787	6.55991	7.46663	7.92859	7.57445	7.62832	7.75782	7.72534	7.45657	7.59718	7.5523	7.17676	6.43041	7.50997
GL50803_25816	6.35395	9.34791	7.40998	6.75142	7.16104	7.25447	7.17893	7.09886	7.14363	6.96135	5.65146	6.50494	6.36156	8.22364	6.38863	6.65141	6.66278	6.84781	6.97001	7.00237	7.0927	7.05283	6.56971	6.61979	8.52652	7.25379	6.71642	7.136	7.12708	7.27206	7.05363	7.16658	7.44719	7.41683	6.59211
GL50803_101278	10.6322	10.7004	10.9914	11.1224	11.3875	11.4708	11.4277	11.3757	11.2509	11.1321	9.04037	10.5377	9.48652	9.86923	9.96246	9.59954	9.57361	9.53425	9.66139	9.67297	10.0716	9.79584	9.06018	9.19993	9.27984	9.6327	9.83173	9.88066	9.95895	10.4265	10.2677	10.2512	10.6314	8.93822	9.25293
GL50803_16279	7.66046	7.59998	7.59141	7.49998	7.41676	7.22063	7.21466	7.09663	7.15348	7.17938	6.40054	7.82835	7.9456	7.87303	7.82186	7.75011	7.64183	7.4869	7.22041	7.10623	6.93459	6.79969	6.27141	7.58205	7.8939	8.01029	7.76043	7.62374	7.37648	7.16205	7.20547	7.02371	6.99672	6.26239	7.88189
GL50803_4018	7.31182	7.29607	7.22556	7.1933	6.75539	6.71655	6.48303	6.25341	6.20559	6.15412	9.51076	7.50906	7.34852	7.09805	7.24174	6.97305	6.78416	6.42844	6.39649	6.21613	6.14647	6.14671	7.32236	6.72233	6.78616	6.83761	6.68777	6.52688	6.35469	6.13931	6.14779	6.09497	5.88186	7.02153	6.97076
GL50803_4017	6.02922	6.22538	6.15297	6.15369	5.87926	5.9283	5.79453	5.62681	5.56423	5.63736	5.06798	6.13718	6.06256	5.97734	6.14588	5.8057	5.75703	5.60615	5.5482	5.70123	5.75052	5.68807	4.53096	5.72902	5.8743	5.92746	5.84267	5.73096	5.61668	5.67396	5.4583	5.40647	5.60715	5.05265	5.89598
GL50803_4016	7.01925	6.98059	6.99818	6.96137	6.92712	6.90124	6.83781	6.80532	6.85408	6.81147	6.81366	6.98719	6.9021	6.87998	6.98026	6.81233	6.69869	6.75367	6.57382	6.76786	6.73689	6.73781	6.49764	6.65824	6.8521	6.87689	6.71642	6.68388	6.72997	6.65023	6.80953	6.83965	6.62895	6.45384	6.79299
GL50803_95003	6.57048	6.61328	6.73823	6.71103	6.90939	6.85249	7.01815	7.14812	7.21496	7.2323	5.97378	6.5796	6.3982	6.65054	6.83218	6.64936	6.68764	6.70522	6.72035	6.69848	6.97868	7.07916	6.34855	6.458	6.72696	6.90021	6.86267	6.86433	6.94383	7.04295	7.0029	7.09	7.15683	6.47363	6.58508
GL50803_95001	6.46023	6.5915	6.60328	6.47839	6.56714	6.44969	6.52263	6.58452	6.67219	6.66833	5.93366	6.50412	6.64216	6.67251	6.66426	6.53543	6.46775	6.44657	6.31615	6.40622	6.53543	6.42268	6.05692	6.45403	6.62277	6.65334	6.57181	6.56416	6.51411	6.59096	6.56371	6.58214	6.63617	6.23174	6.50064
GL50803_14101	4.62091	4.86067	4.8618	4.81824	5.05549	5.04962	5.27352	5.50436	5.4134	5.6578	7.67926	4.47245	4.73921	4.84174	4.88766	4.8848	4.89188	4.82864	4.94064	5.07035	5.27249	5.1499	6.93518	4.96388	4.97082	5.09629	4.95995	5.01707	4.84507	5.23943	4.89616	4.81704	5.44894	6.61396	4.79814
GL50803_6048	5.65415	5.8955	6.09598	5.95906	6.07815	6.10882	6.16953	6.10051	6.03816	6.10566	4.94824	5.78083	6.00407	5.93919	6.02645	5.85877	5.88399	5.93973	5.96415	6.03097	6.20096	6.11054	5.18433	5.89746	5.91639	6.06317	6.055	6.23983	5.97511	6.32769	5.9215	6.00031	6.36969	5.62436	5.75501
GL50803_14100	7.00782	7.21016	7.20459	7.1939	7.25089	7.20664	7.17198	7.23023	7.2475	7.22504	6.54336	7.05291	7.14401	7.27073	7.26997	7.17345	7.19641	7.15339	7.18444	7.1386	7.32644	7.23388	7.15545	7.16302	7.28938	7.29859	7.22865	7.3367	7.35631	7.44445	7.38187	7.47892	7.41944	7.22686	7.08392
GL50803_16283	7.09319	7.76178	7.67266	7.64268	7.81133	7.77163	7.75709	7.68402	7.77172	7.66917	7.63428	7.23331	6.8836	7.4973	7.36085	7.26611	7.13628	7.20463	7.23221	7.21466	7.47257	7.33898	8.33689	7.07584	7.40269	7.37838	7.42979	7.40977	7.46663	7.64453	7.59338	7.60131	7.65153	8.66465	6.88279
GL50803_14098	6.6721	6.88325	6.81372	6.70936	6.55789	6.51062	6.65251	6.68289	6.70805	6.66771	5.72382	6.84146	6.94362	7.17753	7.10926	7.03305	6.91939	6.8133	6.6381	6.74191	6.64969	6.53692	6.05414	6.93544	7.16833	7.25526	7.03693	6.91289	6.81061	6.7472	6.77513	6.70727	6.80128	6.37012	7.10909
GL50803_40496	9.69763	9.85479	9.85448	9.80166	9.6765	9.6423	9.7142	9.75668	9.71862	9.82577	8.99113	9.69857	9.35803	9.51686	9.67661	8.89022	8.89771	8.41191	8.62584	8.64184	9.00462	8.8602	8.85836	8.83489	9.28632	9.4476	9.29237	9.1538	8.8627	9.20931	8.94766	8.68564	9.43749	9.00942	8.95791
GL50803_101291	7.05854	6.85047	7.07271	7.03267	6.93234	6.80722	6.75977	6.93574	6.55375	6.67962	7.63365	7.16665	5.3143	6.39795	6.41029	6.07809	5.62039	5.73642	6.58975	4.49874	5.62953	6.0412	7.43384	6.1499	5.67489	6.50504	6.79577	6.0956	6.24289	6.38035	6.8137	6.16499	6.24401	6.48017	6.74676
GL50803_16766	9.36136	9.34816	9.15942	9.03365	8.73397	8.54685	8.62835	8.6313	8.73512	8.73508	9.54312	9.4572	9.53275	9.58012	9.46705	9.42267	9.24075	9.16907	8.95463	8.96489	8.86204	8.90504	8.86832	9.52233	9.45791	9.50503	9.20357	9.08325	8.90394	8.85222	8.88381	8.97251	8.79125	8.33491	9.60069
GL50803_137684	8.33491	8.32991	8.40543	8.3468	8.12795	8.04723	7.95673	7.88531	7.84981	7.85047	7.29981	8.40848	8.43098	8.45905	8.58875	8.11635	7.89148	7.66704	7.58688	7.47576	7.56671	7.39654	7.3465	7.70769	8.21213	8.51282	8.10651	7.91635	7.64554	7.52942	7.49224	7.31942	7.48366	7.10424	8.16601
GL50803_16765	7.20692	6.95653	6.90442	6.88265	6.97464	6.88271	6.94602	6.80669	6.88219	6.81489	5.4698	7.23132	7.30297	7.05855	7.04813	7.04715	7.05741	7.14433	6.90384	7.19053	7.19099	7.18781	6.13818	7.20424	6.98877	6.97096	6.86459	6.90596	6.88464	7.01913	7.02875	7.19002	7.06783	5.78606	7.2696
GL50803_6212	5.42518	5.66782	5.76357	5.54997	5.34266	5.00505	4.88854	4.61122	4.73547	4.75271	3.66527	5.70396	5.93964	5.99953	6.09972	5.9583	5.96655	5.8864	5.60539	5.42558	5.13218	5.12154	4.02714	5.957	6.21318	6.20756	6.01864	5.94026	5.45699	5.19489	4.91402	4.68541	5.10225	4.7622	6.11861
GL50803_6211	6.70706	6.83057	6.66176	6.50563	6.35835	6.17526	6.2992	6.54909	6.62555	6.65378	7.8069	6.74291	6.91627	7.05744	6.99179	6.9725	6.87679	6.8391	6.62189	6.75336	6.51026	6.6258	6.86212	7.00274	7.18564	7.02298	6.74452	6.5785	6.59737	6.38274	6.46722	6.43729	6.31767	6.78734	7.03737
GL50803_137672	6.16686	6.35835	6.23229	6.21746	6.39752	6.39892	6.5451	6.72823	6.70135	6.84918	7.06091	5.99777	5.21847	5.45232	5.41548	5.4509	5.24331	5.46131	5.67931	5.47866	5.83807	6.07458	6.7818	5.61563	5.59795	5.51078	5.78161	5.63671	5.68295	5.972	6.11632	6.24078	6.37746	6.85553	5.76749
GL50803_136020	1.81338	2.05898	1.90815	1.70513	2.00489	1.8193	1.73948	1.73596	1.7433	1.83435	2.42252	2.0529	1.0155	1.60067	1.55685	1.13738	0.597	1.19004	1.31995	0.467687	1.23222	1.69589	2.16195	1.27626	1.3582	1.89779	1.68066	1.1395	1.6016	1.84614	1.96558	1.69675	2.04403	1.97703	1.6468
GL50803_15832	10.9049	11.051	11.0653	10.917	10.7548	10.5257	10.5468	10.4419	10.556	10.401	9.95861	11.0438	10.8708	11.2377	11.0774	10.8718	10.6638	10.6008	10.5416	10.1464	10.2714	10.2307	9.86359	10.7289	10.7588	10.8952	10.7663	10.6139	10.4468	10.4381	10.3678	10.2375	10.205	8.52507	10.8308
GL50803_95233	6.29876	6.07046	5.95414	6.01023	6.0604	6.15326	6.22626	6.20663	6.31317	6.13329	6.58281	6.23976	6.48788	6.29691	6.23983	6.45546	6.5412	6.75763	6.58808	6.7666	6.60918	6.632	6.61394	6.61411	6.27469	6.1276	6.1272	6.20125	6.31083	6.16078	6.35157	6.36955	6.26184	6.01483	6.38982
GL50803_136021	1.6661	1.16876	1.43859	1.65039	1.42864	0.704258	1.31786	0.927928	1.06283	0.840378	1.42723	1.9009	0.0539061	0.242288	0.828911	0.785276	-0.307317	0.475756	1.28743	-1.36595	-0.647523	0.718229	0.827951	0.44309	0.441275	1.12024	1.01195	0.956527	0.43619	0.922572	1.24831	-0.258574	0.840953	-0.304332	1.29224
GL50803_16768	8.57254	8.82941	8.7913	8.78772	8.42236	8.30726	8.08047	7.7816	7.82291	7.69165	7.61981	8.73502	8.59939	8.69861	8.98818	8.43127	8.35509	7.95757	7.89211	7.86277	7.80471	7.62154	7.57574	8.14266	8.6264	8.76721	8.66111	8.47825	8.11908	7.96518	7.87304	7.50781	7.82891	7.82053	8.49104
GL50803_114651	4.48469	4.70706	4.78203	4.69854	4.60162	4.41595	4.14361	4.0948	4.20977	4.10381	3.00591	4.81579	4.95357	5.07297	5.10933	5.20851	5.01092	4.92346	4.7055	4.68031	4.58834	4.28574	3.26575	4.8906	5.20202	5.454	5.3281	5.30254	4.69525	4.67559	4.04993	4.04208	4.51007	3.78891	5.26133
GL50803_26955	3.06122	2.89532	3.22332	3.20322	3.12008	3.17883	3.17211	3.28284	3.1798	3.30296	5.59341	2.93065	3.08129	3.11861	3.20588	3.56929	3.62048	3.76203	3.63895	3.54395	3.41818	3.7318	5.21462	3.43646	3.42807	3.56701	3.64522	3.71365	3.40963	3.62346	3.26433	3.42231	3.74473	4.62149	3.70788
GL50803_21082	6.79905	7.03685	7.07829	6.9954	6.89143	6.78706	6.65465	6.4738	6.67219	6.62552	5.7001	6.97831	6.70947	7.25965	7.4107	7.267	7.43459	7.07717	7.13503	7.03921	7.10844	7.21439	6.24231	7.2411	7.65484	7.60698	7.57259	7.49618	7.21882	7.10107	6.90527	6.51277	6.81597	6.9944	7.29998
GL50803_50116	5.92643	5.77727	5.70091	5.60859	6.05444	6.11063	6.40891	6.63991	6.67082	6.80576	6.2761	5.77127	4.76814	4.91974	4.86023	5.0286	5.04402	5.30391	5.91444	5.2391	5.83672	6.33801	6.8315	5.67548	5.2338	5.34984	5.48121	5.28323	5.6096	5.91052	6.29646	6.48608	6.4157	7.21319	5.31486
GL50803_137682	0.311151	0.598895	0.373414	1.07527	0.76613	0.802768	0.533732	1.04353	0.394262	0.380989	0.0728152	1.01637	-0.747866	0.111153	-0.210892	-0.289309	-0.564769	-0.51935	1.18522	-2.33299	0.0923436	0.808564	1.55204	0.0305684	0.0288035	0.2516	0.311649	-0.447096	-0.119394	0.736195	1.24831	0.829693	1.06283	0.500847	0.855544
GL50803_1908	5.19604	5.10498	5.17602	5.14221	5.08856	5.05837	4.93388	4.63905	4.89658	4.58941	4.62953	5.10602	5.40249	5.34149	5.25623	5.52441	5.64217	5.85837	5.85604	6.15317	5.75195	5.75775	6.85413	5.72375	5.23934	5.12225	5.08608	5.32727	5.65433	5.32955	5.45677	5.6071	5.15143	7.44633	5.37835
GL50803_1909	5.30378	5.20769	5.19375	5.05795	5.07212	4.90326	4.67183	4.59235	4.50876	4.39308	4.17924	5.37122	5.51537	5.07297	5.13661	4.80592	4.8307	4.79559	4.82361	4.84156	4.72002	4.56704	4.35178	4.65371	4.72988	4.76121	4.49783	4.53909	4.77591	4.60925	4.70423	4.82771	4.40921	3.84062	4.81354
GL50803_26129	3.66304	3.5998	3.33402	3.54833	3.28402	3.33102	3.10692	3.24309	3.02534	2.95209	6.10602	3.3676	3.51897	3.4042	3.17383	3.16421	3.36707	3.48428	3.65178	3.30207	3.69921	3.53416	5.84416	3.33654	3.2926	2.79391	2.99316	3.23162	3.76616	3.272	3.58732	3.41525	2.92567	5.83532	3.2195
GL50803_31617	5.06986	4.95293	5.08715	5.02874	4.7329	4.70895	4.65482	4.41408	4.52706	4.42623	3.36088	5.07749	5.33026	5.11208	5.04434	5.20851	5.2781	5.45969	5.38872	5.61739	5.3196	5.26006	3.59227	5.3665	5.07565	4.85707	4.74592	4.80322	5.34206	5.18399	5.27524	5.41711	5.00971	3.63343	5.17881
GL50803_13809	6.3788	6.43091	6.4883	6.29981	6.17809	6.10762	6.14741	6.17106	6.24757	6.31801	4.83952	6.5796	6.49183	6.49977	6.65703	6.56767	6.49969	6.21625	6.19317	5.84729	5.92696	5.73634	5.15859	6.43402	6.69239	6.66589	6.5401	6.31593	5.96738	5.91162	5.90261	5.5111	5.66333	5.25675	6.67994
GL50803_5013	4.24189	4.35985	4.31583	4.29661	3.87743	3.93836	3.98938	3.63586	3.77209	3.70277	3.03654	4.37483	4.41603	4.47252	4.46936	4.45431	4.29657	4.10268	4.09393	4.02318	3.92927	3.56688	3.3409	4.41328	4.62943	4.57954	4.55923	4.41325	4.16046	3.99169	3.77492	3.51762	3.71777	4.13376	4.49676
GL50803_5012	7.80573	7.67121	7.59642	7.50529	7.18253	7.12569	6.98396	6.80259	6.89809	6.77977	8.07149	7.7225	7.91771	7.67323	7.70756	7.89603	7.95634	7.93323	7.7775	7.73481	7.45992	7.23235	7.27644	8.07606	7.93401	7.73165	7.81444	7.79546	7.85226	7.34318	7.59199	7.26503	6.92075	6.89519	8.113
GL50803_60466	5.92238	5.78171	5.79874	5.53494	5.46462	5.44997	5.47908	5.36685	5.54191	5.57425	7.80523	5.95619	5.43072	5.63944	5.58957	5.79336	5.72616	5.95592	6.03688	5.5577	5.67553	5.78582	6.81183	6.12516	5.9083	5.83107	5.77753	5.6787	5.8688	5.65699	5.78986	5.50447	5.49413	6.39627	6.04877
GL50803_5010	9.07194	8.9708	8.93148	8.88763	8.83119	8.79906	8.79006	8.81113	8.8951	8.82622	11.2878	9.19131	9.21708	8.9171	8.91629	9.11633	9.21555	9.29661	9.25885	9.34033	9.07953	9.12371	9.854	9.4317	9.0442	8.78306	8.76489	8.81308	8.98608	8.83882	8.94426	8.85163	8.52018	9.14874	9.23742
GL50803_16479	6.20627	6.5373	6.57539	6.44761	6.38045	6.32522	6.42069	6.49596	6.4727	6.60921	6.17476	6.30652	6.26339	6.62898	6.55962	6.32781	6.27535	6.13119	6.00598	5.97448	6.04264	5.91471	5.62489	6.10708	6.63823	6.67249	6.63396	6.4742	6.25474	6.32604	6.15156	6.11688	6.27762	6.17446	6.35417
GL50803_21444	8.56671	8.53478	8.54344	8.46082	8.00962	7.83393	7.5916	7.39438	7.43276	7.35394	9.01054	8.77452	8.74903	8.75392	8.83936	8.7547	8.69792	8.49482	8.47945	8.08419	7.87507	7.84043	7.98449	8.7849	8.74613	8.64235	8.6807	8.52566	8.42505	8.04414	8.13792	7.79074	7.51414	7.77209	8.89934
GL50803_2419	6.11455	5.90504	5.9279	5.96888	5.98087	6.17239	6.19719	6.04956	6.06345	5.82867	4.83081	6.13612	6.13703	5.81695	5.78392	6.02736	6.13327	6.336	6.27008	6.44282	6.3474	6.25107	5.54371	6.22728	5.88494	5.72214	5.76112	6.01242	6.20955	6.29091	6.43897	6.50863	6.22499	5.14191	5.98609
GL50803_32668	6.39644	6.8133	6.83553	6.7692	6.63186	6.52287	6.337	6.05875	6.15942	5.91929	5.96186	6.54235	6.79437	7.03613	7.05859	7.06625	7.08105	7.07505	7.03635	7.14586	6.84752	6.79279	6.64763	6.81189	7.1775	7.17951	7.19799	7.02353	7.15117	6.91643	6.79635	6.88632	6.81406	7.74045	6.80349
GL50803_2421	6.08102	7.44508	8.52547	8.79168	9.17545	9.51015	9.50043	9.62416	9.7163	9.51456	9.49016	5.93677	6.15407	7.10883	7.71872	8.2438	8.80504	9.26272	9.75912	10.1596	9.99498	10.0383	11.1298	6.44366	7.53877	8.34662	8.63565	9.03542	9.61249	9.57186	9.65219	9.86949	9.61261	12.9806	6.30755
GL50803_16482	5.85597	6.00731	6.05293	6.12887	6.50201	6.75474	7.09895	7.46001	7.45284	7.53645	8.57545	6.06749	6.16102	6.02934	5.98549	6.36497	6.5412	6.77925	6.78729	7.02196	7.27008	7.39381	8.04965	6.54415	6.30052	6.15405	6.24202	6.46566	6.8069	7.20311	7.07711	7.38092	7.46554	7.64553	6.29193
GL50803_16483	5.71162	5.74727	5.6526	5.54247	5.54168	5.52133	5.51093	5.44602	5.5464	5.39866	5.54363	5.7575	5.91868	5.90247	5.79844	6.0242	6.20735	6.23154	6.1361	6.29049	5.91806	6.11387	5.47864	6.14794	6.03998	5.85061	5.6659	5.83012	5.87826	5.89723	5.83391	6.085	5.91191	5.70747	5.90833
GL50803_4954	2.69394	2.52283	2.4701	2.44523	2.48814	2.35396	2.9108	3.14295	3.06762	3.18116	3.61541	2.62579	2.94052	2.85731	2.67553	2.87671	3.11184	3.21881	3.09798	3.13318	3.23369	3.22533	3.22665	3.38403	3.11122	3.0316	2.72639	2.84578	2.92592	2.80636	2.77119	2.99071	3.28281	3.21459	3.11686
GL50803_27293	5.96765	5.92796	5.85922	5.7968	5.8172	5.66902	5.93731	6.14864	6.17304	6.35133	6.7835	6.07083	6.20111	6.21545	6.08471	6.26306	6.32848	6.33777	6.24066	6.18264	6.22694	6.2561	6.42826	6.53065	6.28007	6.24052	6.15364	6.24483	6.18975	6.11465	6.03194	6.12447	6.21731	6.01258	6.34133
GL50803_16484	6.93997	7.11234	7.20167	7.2571	7.0563	6.94504	6.95993	6.9207	6.9196	7.0943	9.78513	7.22233	7.23159	7.31377	7.45388	7.22765	7.13537	6.97643	6.8422	6.87306	7.02146	7.04588	9.28585	6.96809	7.35333	7.57209	7.33642	7.46438	7.25965	7.16112	7.10215	7.09663	7.46473	9.13793	7.28625
GL50803_16485	5.5892	5.5124	5.43638	5.35831	5.40211	5.36889	5.44981	5.46688	5.54491	5.37724	7.84849	5.52702	5.67663	5.56309	5.61963	5.50184	5.55839	5.54933	5.47608	5.39829	5.38936	5.42977	6.66418	5.56207	5.63343	5.5075	5.36476	5.27543	5.34377	5.2324	5.35258	5.29558	5.25819	6.2831	5.43633
GL50803_4950	6.24787	6.20897	6.08019	6.13636	6.07697	5.98185	6.11669	6.1149	6.26675	6.1342	7.48819	6.30463	6.37701	6.248	6.18561	6.30278	6.16283	6.20855	6.12233	6.22529	5.95832	5.99386	6.52004	6.22075	6.37451	6.2766	6.09483	6.20536	6.06068	5.92368	6.09299	5.99322	5.84247	6.13773	6.39055
GL50803_16486	6.26504	6.4746	6.38666	6.36926	6.38426	6.43248	6.3773	6.27919	6.34446	6.29045	5.90282	6.33923	5.70275	5.98204	5.79054	5.49576	5.34838	5.2009	5.32205	5.46635	5.43107	5.33606	6.04011	5.28127	5.64738	5.65408	5.68922	5.6106	5.69905	5.65304	5.78865	5.6468	5.63335	5.96445	5.47696
GL50803_4946	5.91561	5.58544	5.60703	5.6211	5.70897	5.76531	5.89569	5.98595	6.18173	6.12046	5.06055	5.77127	5.7719	5.53299	5.3965	5.55835	5.43315	5.58547	5.44509	5.65043	5.76761	5.72043	5.96786	5.58112	5.21519	5.24151	5.26549	5.23378	5.26483	5.39717	5.51937	5.48101	5.51776	5.26812	5.56796
GL50803_39117	4.35443	4.47415	4.37917	4.54568	4.59835	4.44102	4.34431	4.36677	4.25803	4.34977	4.6934	4.67056	4.73655	4.71481	4.70628	4.88248	4.90678	4.85355	4.68379	4.59521	4.63876	4.35108	4.31498	4.76296	4.55442	4.59816	4.7487	4.77584	4.6872	4.65732	4.54429	4.60398	4.39906	4.49812	4.83093
GL50803_111732	5.20051	5.04705	4.94089	5.00439	5.07684	5.15361	5.02272	5.32747	4.85615	5.11985	4.6934	5.07749	3.23236	3.81043	3.37047	3.35765	3.02087	3.46501	4.8955	2.73155	3.8619	4.73194	5.07301	3.78372	3.6877	3.89772	4.29619	3.51603	4.14095	4.53114	4.99386	4.53731	4.78661	5.16643	4.13996
GL50803_113531	8.18825	8.61795	8.75072	8.8664	9.2448	9.32514	9.23873	9.35543	8.88833	8.97235	9.35428	8.09265	7.31638	8.29004	8.08951	7.65783	7.40417	7.27548	7.77457	7.24742	7.94716	8.02131	10.4547	7.07118	7.72625	8.03527	7.99544	7.71125	7.77176	8.2053	8.16637	8.01965	8.51627	10.8674	7.31706
GL50803_5144	1.94701	2.70866	1.96431	2.36249	2.24168	2.44828	2.70594	2.61708	2.79311	2.94379	5.09733	2.4034	2.93125	3.20154	2.64078	3.30993	2.94041	3.14	3.14412	3.06947	3.14927	3.14092	4.77405	2.9604	3.44733	2.62265	2.58437	2.79213	2.59978	2.9158	2.47893	2.60072	2.89712	4.3055	2.18225
GL50803_5142	7.12174	7.38741	7.27149	7.33619	7.66712	7.79164	8.00057	8.01579	8.17439	8.09117	6.67086	7.34339	8.01362	8.02848	7.90688	8.1629	8.09869	8.19001	8.2072	8.22972	8.27284	8.34608	7.10514	7.63594	7.95098	7.7154	7.82895	7.93751	8.15454	8.33309	8.22656	8.20186	8.39686	7.6005	7.67047
GL50803_7760	6.59105	6.55559	6.56861	6.72765	6.8445	6.93422	6.94835	6.87656	6.92421	6.81261	7.22864	6.57647	6.8216	6.69415	6.62553	7.10121	7.29029	7.52345	7.54966	7.69446	7.4586	7.49845	6.923	6.89034	6.8124	6.65704	6.55446	6.82346	6.96674	6.94091	7.26713	7.24278	7.05927	6.82761	6.46696
GL50803_90665	7.58899	7.52637	7.60638	7.59455	7.60604	7.61966	7.6769	7.80295	7.74299	7.81451	6.43112	7.63524	7.59557	7.49196	7.63621	7.14363	7.10847	7.03586	7.12356	7.15068	7.47257	7.47795	6.68597	6.98689	7.24969	7.46629	7.26257	7.23432	7.22717	7.42876	7.41085	7.26699	7.71425	7.19444	7.17868
GL50803_14534	2.87254	2.93844	3.24615	3.12506	3.92004	3.65822	4.16378	4.25928	4.27257	4.51853	1.96196	3.34569	3.11444	3.09277	3.49244	3.18703	3.26505	3.14	3.11661	3.45325	3.8619	3.92593	2.16195	3.31569	3.32073	3.42129	3.4406	3.59334	3.16108	3.94511	3.07093	2.89252	4.33309	3.48537	3.31531
GL50803_16713	4.57692	4.2357	4.54023	4.42039	4.28042	4.28999	4.2265	4.13446	4.23966	4.21143	3.77833	4.39276	4.51864	4.37585	4.5866	4.57456	4.59085	4.64961	4.41316	4.44954	4.49906	4.36603	3.85836	4.61726	4.58953	4.75016	4.67762	4.86428	4.64903	4.66257	4.54429	4.49443	4.58059	4.14203	4.77136
GL50803_90659	5.3427	5.8052	5.82741	5.95341	6.22345	6.26007	6.40722	6.39346	6.55078	6.5834	6.89427	5.49087	5.78096	5.83134	5.85386	6.29229	6.31018	6.53239	6.30197	6.60538	6.62333	6.71098	6.92758	6.06502	6.04631	6.06094	6.32995	6.43185	6.58731	6.86845	6.70056	6.96392	6.88181	6.88538	5.69095
GL50803_7765	6.47137	6.53467	6.6099	6.81348	6.97843	7.04999	7.05318	7.07585	7.17973	7.0539	5.71911	6.4842	6.59744	6.59103	6.65631	6.84259	6.95362	7.12246	7.10327	7.21466	7.24792	7.14836	5.93792	6.88387	6.70244	6.81856	6.94911	7.16479	7.30419	7.40001	7.38787	7.53247	7.36921	6.5748	6.6895
GL50803_7766	11.4583	11.4371	11.4636	11.4065	11.1601	11.0694	10.8669	10.7732	10.6843	10.594	9.32976	11.4949	11.2048	11.4242	11.3988	11.4495	11.4277	11.4707	11.6016	11.1923	11.2014	11.4161	10.0355	11.5611	11.2209	11.3647	11.3247	11.2181	11.337	11.1924	11.3654	11.3637	10.9475	9.02905	11.4262
GL50803_16715	6.47874	6.71133	6.61867	6.62846	6.75392	6.79979	6.84969	6.79092	6.78291	6.83579	5.85635	6.54956	6.49183	6.67033	6.56812	6.55384	6.6221	6.6494	6.67157	6.85664	6.78174	6.71755	6.01738	6.60125	6.86648	6.85964	6.78296	6.7515	6.89283	6.94737	6.94436	6.89014	6.94303	6.49799	6.55268
GL50803_14539	7.13988	7.17453	7.1413	7.09358	6.7809	6.66633	6.39532	6.12587	6.00591	5.83092	5.90904	7.1562	6.78475	6.97321	7.09167	6.70839	6.64004	6.43671	6.34112	6.44361	6.18726	6.04933	6.46231	6.54639	6.79245	6.90831	6.8204	6.67131	6.6038	6.37796	6.51115	6.30898	6.20668	6.69063	6.74791
GL50803_16716	8.75958	8.18608	8.26438	8.3103	8.39666	8.22263	8.29389	7.9887	8.11011	7.81536	9.72543	8.93952	8.83342	8.28696	8.3129	8.18998	8.09451	7.94863	7.68026	7.44667	7.38944	7.20662	10.8558	8.27902	7.85235	8.01751	8.09782	8.12031	7.75228	7.61271	7.77536	7.3895	7.38601	10.4859	8.63835
GL50803_16717	8.58924	8.17119	8.43584	8.43169	8.28571	8.25792	7.9754	7.68142	7.63748	7.45485	5.79721	8.60577	6.74032	7.3533	7.32162	7.3823	7.18161	7.6257	8.53461	6.52007	7.53004	8.31174	7.28241	7.70569	6.93234	7.60583	7.89687	7.47336	7.72272	7.94353	8.26968	7.86964	7.81785	6.22007	8.12781
GL50803_16718	6.03798	5.93596	5.9402	5.89132	5.69983	5.79404	5.89328	6.01457	6.02856	6.25902	4.87385	5.97891	5.70002	5.85971	5.81931	5.66785	5.53803	5.64805	5.77038	5.40153	5.61229	5.79276	4.84676	5.69848	5.45139	5.68343	5.40757	5.52275	5.39903	5.47821	5.60981	5.64379	5.51933	4.56728	5.6351
GL50803_98056	10.3505	10.3359	10.4004	10.2687	9.9298	9.75372	9.52003	9.28731	9.275	9.13712	7.95003	10.3861	9.62979	10.0685	10.0457	9.84571	9.5228	9.62992	9.82433	8.92101	9.19234	9.47063	8.5409	9.51377	9.59073	10.0785	9.79173	9.3761	9.26524	9.15964	9.44822	9.38781	9.14811	7.48259	9.89492
GL50803_15026	6.33477	6.69649	6.7691	6.7708	6.88942	7.0923	7.15847	7.3156	7.27302	7.29236	6.63628	6.52945	6.69173	6.98554	6.98546	6.85214	6.85885	6.9449	7.10093	7.22383	7.34553	7.39745	6.61394	6.36384	6.753	7.10553	6.918	6.975	7.12658	7.28699	7.33292	7.58017	7.38	6.5012	6.47251
GL50803_25235	6.96317	7.08682	7.26522	7.40602	7.37573	7.55245	7.42526	7.24087	7.31003	6.95826	5.99538	6.95136	7.0625	7.18926	7.31659	7.30357	7.35147	7.49721	7.6522	7.86071	7.60049	7.51405	6.02879	6.90088	7.08673	7.26208	7.32111	7.40977	7.63057	7.38977	7.52311	7.47807	7.0906	6.47363	6.95448
GL50803_88922	5.18706	5.19663	5.21415	5.03142	4.76831	4.7802	4.74328	4.66034	4.75888	4.63651	5.40084	5.17599	5.59091	5.24704	5.16134	5.51693	5.56243	5.62218	5.64282	5.67338	5.25239	5.18616	4.78082	5.84872	5.51364	5.34065	5.34104	5.3102	5.28985	5.12253	5.1825	5.13951	4.92504	5.20245	5.66451
GL50803_9741	7.11938	7.20796	7.15116	7.18249	7.08233	7.14899	7.06288	7.10664	7.04921	6.95207	6.35873	7.20062	7.15551	7.14385	7.21885	6.89204	6.74147	6.73368	6.85474	6.91388	6.97562	6.89684	6.17715	6.51168	6.90821	7.0435	6.73825	6.77934	6.90792	6.92299	7.01743	7.06317	6.8096	6.28123	6.80459
GL50803_25238	8.53986	8.65679	8.90438	8.9171	8.72743	8.77177	8.56851	8.45198	8.39546	8.3047	7.88787	8.49958	8.12454	8.34169	8.29532	8.06518	7.9759	8.04046	8.23144	8.01479	8.17855	8.25588	9.27422	7.68247	7.75746	8.10037	8.24423	8.24385	8.14918	8.17603	8.19221	8.44857	8.31941	9.4166	7.75947
GL50803_16720	9.14039	9.16371	9.08914	9.10283	8.70571	8.64627	8.34779	8.15136	8.12219	8.03196	9.33362	9.20469	8.66536	8.783	8.81715	8.34956	8.18525	8.01639	7.94226	7.76372	7.75166	7.65083	8.16852	8.09631	8.3245	8.46524	8.481	8.22878	8.17244	8.02085	8.12671	8.13954	7.83676	7.88413	8.38112
GL50803_9746	5.66712	5.85528	5.83872	5.74058	5.57706	5.67228	5.49031	5.17525	5.17318	5.07875	5.11538	5.74221	5.9603	5.81695	5.98202	5.6719	5.66739	5.3449	5.40586	5.21722	5.18402	4.82686	4.97025	5.56354	6.06098	5.92254	5.88746	5.69048	5.37584	5.07809	5.05147	4.99557	4.89165	5.07009	5.94474
GL50803_15030	5.20051	4.9608	5.0258	4.86708	4.93601	4.92393	4.67183	4.58601	4.71965	4.55167	5.11896	5.08413	5.21656	5.28557	5.35601	5.15357	4.97502	4.87561	4.81222	4.61208	4.45402	4.23371	5.04519	4.97278	5.44022	5.36984	5.33735	4.96226	4.8232	4.56233	4.80338	4.56307	4.44909	5.21817	5.33938
GL50803_9750	7.09259	7.15296	7.13825	7.13965	6.85689	6.75819	6.67306	6.46778	6.60345	6.39992	6.21213	7.33043	7.30431	7.29737	7.26427	7.33796	7.26986	7.01614	6.91386	6.50284	6.37275	6.21023	5.92271	7.17513	7.45994	7.38555	7.28952	7.16795	6.96285	6.57923	6.60278	6.20645	6.0896	6.2586	7.51906
GL50803_9751	7.49982	7.48743	7.35722	7.26737	7.18089	7.15862	7.16649	7.05074	7.15495	6.99788	8.55742	7.53511	7.72996	7.50671	7.47828	7.60021	7.67888	7.71371	7.58939	7.78371	7.48123	7.50268	8.34204	7.91418	7.79898	7.44503	7.39387	7.47165	7.60516	7.3945	7.44388	7.49741	7.08005	8.37271	7.78759
GL50803_9752	6.91573	7.02814	7.08859	7.07226	7.01021	7.00188	6.96339	6.82093	6.88692	6.90849	6.09878	6.8839	6.95795	6.9908	7.10235	6.78704	6.83956	6.70932	6.65414	6.82444	6.85686	6.76415	6.10891	6.73154	6.97168	7.10119	7.0981	6.95133	6.84298	6.92026	6.60553	6.59546	6.93017	6.81216	6.77961
GL50803_16721	8.54799	8.55462	8.71817	8.55674	8.19915	7.9804	7.72961	7.4151	7.55407	7.40585	8.30524	8.5749	9.12808	8.98085	8.86609	9.02641	9.01063	8.95439	8.82095	8.69707	8.18599	7.93151	10.0642	9.02692	8.73899	8.82136	8.91042	8.82348	8.51174	8.09278	8.03227	7.83702	7.57961	10.6916	9.0117
GL50803_9755	4.98176	4.82951	4.7937	4.68158	4.83941	4.9253	4.98012	4.86539	5.02013	5.02075	4.88231	4.92327	5.00529	4.88253	4.78795	5.10448	5.14441	5.2009	5.30793	5.45393	5.51949	5.62576	5.39736	5.34609	5.02526	4.92255	4.94792	4.94516	5.18895	5.36375	5.48841	5.68397	5.31865	5.52988	5.18559
GL50803_42000	8.45242	8.67144	8.75818	8.75363	8.57098	8.54373	8.4503	8.24918	8.26461	8.19643	7.8344	8.54536	8.07357	8.23673	8.3886	8.02537	7.95583	7.81073	7.86481	7.91014	8.093	8.07178	7.41657	7.87998	8.11282	8.21788	8.24152	8.13466	8.00417	8.11948	7.94294	7.82941	8.11325	7.84352	7.96475
GL50803_31743	2.0693	1.82626	2.07045	2.27472	2.51619	2.69268	2.54299	2.28253	1.97418	2.05073	3.46589	2.31594	2.16364	2.39026	2.56866	2.31116	2.4644	2.57153	2.41539	2.41011	2.78531	2.52054	2.16195	2.46291	2.65023	2.15411	2.60903	2.58059	2.49301	2.6776	2.30034	2.32765	2.59923	2.52419	2.18225
GL50803_6731	5.82881	5.78762	5.83496	6.04513	5.93356	6.01562	6.00819	5.99436	5.9829	6.01845	7.43744	5.81579	5.97504	5.89003	6.07064	5.8385	5.7044	5.74043	5.59047	5.62987	5.65578	5.62886	5.17409	5.43091	5.73099	5.78983	5.88493	5.80054	5.63633	5.89278	5.54824	5.71446	5.7826	5.08302	5.83263
GL50803_6733	6.61635	6.61826	6.56861	6.65477	6.43656	6.36304	6.11047	6.05302	5.97626	5.96716	7.23443	6.4166	5.97391	6.35059	6.30971	6.11326	5.96655	5.92805	5.959	5.75411	5.75195	5.72623	6.74941	5.72639	6.1838	6.08313	6.03466	5.846	5.92693	5.79947	5.88348	6.03755	5.71605	6.81216	5.96261
GL50803_6735	7.4491	7.62824	7.54614	7.50866	7.53671	7.53084	7.6338	7.7638	7.83428	7.95534	6.99713	7.47581	7.38887	7.59602	7.48931	7.52608	7.52358	7.56703	7.57556	7.78309	7.89724	8.06692	7.57087	7.59291	7.82131	7.61233	7.60015	7.50496	7.49688	7.65739	7.64742	8.05298	7.93337	7.03491	7.41187
GL50803_6736	6.30707	6.25553	6.19757	6.1226	6.43931	6.58949	6.81758	6.87915	6.99657	7.05679	8.6389	6.27884	6.4372	6.14909	6.08686	6.46949	6.5789	6.77208	6.76311	6.96565	6.94777	6.96164	8.12134	6.65617	6.56442	6.23657	6.33919	6.46308	6.70958	6.74844	6.84662	6.93646	6.79871	7.80109	6.47666
GL50803_16647	5.72874	5.64359	5.43886	5.58506	5.4337	5.48656	5.74585	6.03915	6.22813	6.39155	5.91729	5.89589	5.80018	5.73023	5.51957	5.87526	5.85466	6.0001	5.86983	5.87084	5.84614	6.04004	6.32792	6.04089	5.67625	5.67907	5.59823	5.50785	5.50205	5.63047	5.66622	5.69857	5.55022	6.62284	5.89702
GL50803_14284	6.59784	6.57451	6.47266	6.52574	6.55958	6.54527	6.6432	6.56046	6.66188	6.74795	6.03004	6.81446	6.85201	6.57402	6.5735	6.951	6.88273	7.03641	6.85474	6.88757	6.81979	6.8761	6.49764	6.93488	6.68834	6.63091	6.5385	6.66386	6.73323	6.66272	6.71017	6.74434	6.67733	6.92663	6.75988
GL50803_14285	11.0232	10.5971	10.7053	10.9009	11.1663	11.2948	11.3566	11.417	11.4217	11.3693	9.23534	10.8514	11.0709	10.3984	10.4776	10.4485	10.5195	10.4291	10.574	10.4043	10.6241	10.5269	9.35462	10.536	10.3286	10.3242	10.3958	10.4407	10.3674	10.5074	10.5337	10.5278	10.5077	8.53216	10.5276
GL50803_88888	7.98831	7.64501	7.82969	7.88425	8.23413	8.30333	8.60567	8.78887	8.96106	9.03888	8.87966	8.03019	6.87576	7.03726	7.12715	6.7858	6.59673	6.81266	7.10502	7.06853	7.71578	7.88035	7.99253	6.82178	6.59281	6.80526	7.03523	7.0136	7.31686	7.77099	7.80169	8.17991	8.21291	7.18046	7.11265
GL50803_6744	7.58345	7.3752	7.28464	7.34214	7.18089	7.23062	7.29505	7.31512	7.29898	7.33503	11.0034	7.73027	7.67548	7.36998	7.47417	7.71063	7.6466	7.65717	7.66135	7.5396	7.46429	7.3151	9.9919	7.82634	7.4031	7.24348	7.49905	7.52689	7.65313	7.37267	7.55654	7.4211	7.08428	8.90885	7.71273
GL50803_16648	9.43667	9.38113	9.1248	9.2726	8.75858	8.66563	8.51396	8.4247	8.25137	8.31439	10.8148	9.58419	8.47889	8.60822	8.46922	8.3031	8.05398	7.98854	8.11378	7.61685	7.87408	8.0017	9.09655	8.28059	8.30856	8.31133	8.29118	8.04949	8.12679	8.03987	8.20315	8.25543	8.12458	8.70077	8.44005
GL50803_1345	11.0326	11.0395	11.1151	11.0177	10.8575	10.7372	10.6041	10.5186	10.5067	10.4466	9.84517	11.1492	10.3241	10.8549	10.769	10.5913	10.3522	10.4606	10.5646	9.93055	10.251	10.272	10.1972	10.4694	10.4502	10.689	10.6751	10.4267	10.4371	10.3628	10.4946	10.5945	10.3514	9.07969	10.7025
GL50803_32531	5.31413	5.08353	5.29301	5.41279	5.54168	5.58414	5.68573	5.94566	5.85839	6.03417	8.95525	5.33646	5.16608	5.10132	5.13244	5.10047	5.10435	5.21057	5.33801	5.21538	5.40946	5.41367	8.07257	5.17534	4.95296	4.99925	5.20409	5.20328	5.22461	5.45271	5.11654	5.39037	5.33471	7.30716	5.04545
GL50803_42008	7.18961	7.04981	7.14889	7.1353	7.27006	7.21337	7.33697	7.40388	7.44965	7.41526	7.75949	7.14037	7.09088	7.04008	7.14224	7.07188	7.01825	7.12246	7.03879	7.14827	7.228	7.13968	7.31072	7.05607	6.95271	7.09246	7.03238	7.11376	7.07558	7.1891	7.13393	7.1926	7.23733	7.0613	7.06566
GL50803_6524	5.90606	5.74878	5.72142	5.74058	5.64373	5.67797	5.51093	5.33883	5.38191	5.22974	7.57617	5.95498	6.02818	5.68483	5.85006	6.06685	6.19179	6.29111	6.29176	6.48769	6.07733	6.02599	6.93821	6.34938	5.85399	5.69213	5.81511	5.9501	6.28971	6.11561	6.21416	6.0341	5.6477	6.45384	6.0654
GL50803_16650	6.55661	6.63392	6.69014	6.6408	6.52463	6.4435	6.3695	6.33887	6.30701	6.43365	6.28091	6.61515	6.60693	6.66084	6.7571	6.55018	6.52405	6.41428	6.33517	6.42543	6.33503	6.30832	6.2786	6.3016	6.50666	6.62714	6.53609	6.45793	6.3832	6.30774	6.248	6.31278	6.31498	6.66361	6.41959
GL50803_6530	6.22503	6.08852	6.39307	6.19731	6.26743	6.1924	6.08213	6.01811	6.08316	6.04196	5.65639	6.10927	6.0668	6.21644	6.28366	6.14663	6.21421	6.22773	6.37634	6.35202	6.27952	6.40831	5.8761	6.11112	6.03362	6.14774	6.16615	6.2328	6.29767	6.26529	6.22672	6.36131	6.24211	5.87801	6.03006
GL50803_6531	5.61285	5.59051	5.70915	5.6335	5.44651	5.28297	5.3174	5.24735	5.30801	5.30457	5.19221	5.42621	5.75623	5.68627	5.7746	5.71179	5.69952	5.59732	5.49044	5.42876	5.11001	4.98777	4.68312	5.38496	5.77232	5.76258	5.48121	5.4008	5.37584	5.02412	4.96416	4.96691	4.61607	4.60364	5.62766
GL50803_14235	5.96371	5.85388	6.04644	5.96888	5.6983	5.46321	5.3353	5.24534	5.38191	5.50824	4.81764	5.97772	6.32309	6.30349	6.24273	6.24051	6.23037	6.13119	5.89703	5.82817	5.52954	5.53275	6.69852	6.20195	6.22066	6.28907	6.23709	6.10112	5.81194	5.59389	5.4674	5.31845	5.38869	7.23461	6.37877
GL50803_14236	5.90606	5.92528	5.94195	6.05702	6.19337	6.22274	6.20792	6.30162	6.33929	6.23627	5.72852	6.00244	6.00185	6.12486	6.05422	6.34735	6.31737	6.44247	6.59308	6.55974	6.59489	6.62657	7.21159	6.2095	6.23459	6.21059	6.2361	6.56416	6.62993	6.48839	6.77146	6.91035	6.58934	7.21515	6.29507
GL50803_6535	5.48134	5.19885	5.35733	5.74222	5.79448	5.83753	5.75119	5.67092	5.70748	5.53611	4.97616	5.31029	5.62294	5.40935	5.38255	5.64468	5.9222	6.15243	6.31917	6.42384	6.28051	6.3484	6.28575	5.72639	5.38633	5.19743	5.35568	5.82478	6.12169	6.01568	6.25327	6.40203	5.98721	5.95744	5.52317
GL50803_14238	6.24787	6.27354	6.38538	6.33929	6.24141	6.18328	6.14538	6.05761	5.97737	5.9108	3.66527	6.3883	6.5207	6.54414	6.56272	6.50398	6.60393	6.56141	6.50035	6.5481	6.50941	6.55008	5.12177	6.52763	6.50359	6.6089	6.61049	6.60596	6.49426	6.37157	6.1288	6.13094	6.3284	5.25294	6.53023
GL50803_27896	8.20029	8.14296	8.17053	8.19099	7.84039	7.70712	7.71499	7.69842	7.73449	7.78375	6.48625	8.43942	8.3345	8.07486	8.26569	7.8296	7.73153	7.52771	7.4572	7.48151	7.56712	7.44224	7.04741	7.74162	7.88009	8.20047	7.84688	7.78451	7.59265	7.5476	7.51838	7.38815	7.55545	7.28773	7.99497
GL50803_21063	5.82881	5.79644	5.9402	6.00069	5.97077	5.97196	5.92672	5.92947	5.8656	5.81849	4.85249	6.08963	5.21083	5.60177	5.70341	5.55835	5.44923	5.37962	5.50819	5.63813	5.72011	5.72333	5.09489	5.5156	5.37799	5.54477	5.72632	5.65786	5.78956	6.00643	5.88008	5.94505	6.03057	5.03056	5.38426
GL50803_16652	9.96096	9.83585	9.89048	9.82386	9.47277	9.40712	9.14987	8.97754	9.06254	8.81759	7.76578	9.993	6.83781	8.27935	8.0844	7.88677	7.31044	7.738	8.87769	6.17509	7.62336	8.44489	7.90856	7.67295	7.49931	8.51894	8.6865	7.67503	7.86659	8.248	8.71803	8.26233	8.3958	7.28026	8.615
GL50803_13897	7.95333	7.63317	7.56272	7.68202	7.45485	7.51094	7.39614	7.45132	7.57877	7.557	6.4108	7.97237	5.73774	6.567	6.4008	6.4085	6.08263	6.47414	7.41643	5.67605	6.83068	7.54477	7.29782	6.72233	6.41748	6.75845	7.06115	6.56256	6.8484	7.16019	7.47166	7.37911	7.4517	6.26239	7.07664
GL50803_16653	9.69763	9.77154	9.77736	9.88396	9.93792	9.87719	9.87709	9.99792	9.62334	9.70037	8.39293	9.65681	8.73894	9.46115	9.30725	9.17458	8.93478	8.90846	9.02428	8.73269	9.24337	9.19348	8.80586	8.99846	8.81156	9.24692	9.3609	9.19172	9.20755	9.49154	9.5855	9.46959	9.68999	8.32632	9.22575
GL50803_5345	5.95844	6.1028	6.02185	5.97167	5.50366	5.54465	5.30292	5.25537	5.09358	5.17761	5.00742	6.19348	6.07313	5.78906	5.90357	5.41591	5.25832	4.96521	4.75688	4.8487	4.67242	4.5735	6.36665	5.15592	5.383	5.6089	5.28092	5.13597	5.03677	4.81162	4.48279	4.54055	4.68449	6.64628	5.55231
GL50803_5346	8.62873	8.66303	8.54804	8.39599	8.23123	8.1168	8.01647	7.99918	8.09562	8.06055	7.23113	8.60134	8.74722	8.72338	8.57444	8.63413	8.61724	8.48449	8.41223	8.27478	8.0913	8.09272	7.54925	8.71283	8.8182	8.50215	8.35499	8.33296	8.21458	8.00236	7.94022	7.91693	7.77501	7.52902	8.61547
GL50803_5347	7.50344	7.68829	7.68472	7.63697	7.65061	7.62746	7.53852	7.42402	7.52971	7.557	6.64003	7.61209	6.90684	7.31424	7.2576	7.26968	7.12495	7.28787	7.36719	6.92292	7.31097	7.48781	7.24009	7.35188	7.33534	7.35805	7.51952	7.33951	7.39595	7.47718	7.54548	7.78597	7.5908	7.3227	7.41548
GL50803_16810	6.49793	6.69335	6.82419	6.84201	7.28746	7.3792	7.59309	7.72211	7.64727	7.71104	6.20372	6.49336	6.27076	6.46662	6.5495	6.46171	6.48203	6.61703	6.78729	6.9291	7.20883	7.21646	6.42394	6.20384	6.43125	6.56146	6.66443	6.70218	6.91253	7.37107	7.0195	7.24428	7.56494	6.608	6.21037
GL50803_2527	5.12261	5.3562	5.53933	5.57591	5.99713	6.13328	6.33878	6.43727	6.41246	6.30672	5.11538	5.16561	5.06797	5.09916	5.47751	5.30206	5.36543	5.3779	5.61032	5.80023	5.99264	6.02127	5.35719	5.05053	5.25765	5.25331	5.58275	5.54724	5.69772	6.12798	5.77161	6.11579	6.30686	5.34174	4.97482
GL50803_26379	2.84997	3.07029	3.52348	3.58529	3.79398	3.96785	3.92937	3.80377	3.73059	3.82077	3.31164	3.21479	3.29875	3.2491	3.58674	3.44859	3.64607	3.86363	3.88701	3.75103	3.92927	3.94098	2.81694	3.14502	3.44733	3.7722	3.99313	3.87716	3.85027	3.9707	3.8324	3.68536	4.17162	3.59782	3.09543
GL50803_16811	8.08481	8.24336	8.23115	8.28777	8.21822	8.22249	8.28816	8.32015	8.33596	8.32581	7.67379	8.23605	8.20368	8.34876	8.39078	8.26696	8.20626	8.05153	8.09951	7.97894	8.03771	8.07035	7.61412	8.01001	8.38487	8.49161	8.40975	8.28059	8.21528	8.20328	8.18258	8.08307	8.08742	7.64043	8.30594
GL50803_16812	6.41289	6.40905	6.34232	6.33495	6.13012	6.12438	5.84537	5.85493	5.82304	5.74875	6.6733	6.47749	6.10337	6.16881	6.24562	6.15726	5.99472	5.93623	5.92505	5.6477	5.74908	5.5864	5.83769	6.12815	6.1548	6.16449	6.31971	6.21456	6.2058	5.98252	6.04618	6.08611	5.73768	5.88787	6.35867
GL50803_12657	4.58035	4.69139	4.60348	4.77411	4.70576	4.65722	4.75396	4.81205	4.75371	4.96238	3.94098	4.77264	4.73389	4.69777	4.70628	4.74058	4.77611	4.76965	4.86827	5.02068	4.99378	5.0768	3.8711	4.89997	4.74553	4.52545	4.77346	4.64577	4.71386	4.82571	4.7347	4.73725	4.77096	3.83043	4.72558
GL50803_16813	6.50697	6.55213	6.59219	6.55211	6.57049	6.5647	6.59498	6.55397	6.63823	6.66329	5.77694	6.63185	6.46638	6.32307	6.41458	6.478	6.50249	6.4917	6.55942	6.74701	6.76411	6.85506	5.91965	6.62332	6.44729	6.44546	6.51341	6.39993	6.57936	6.66664	6.56795	6.67957	6.57815	5.8096	6.52088
GL50803_16814	4.52443	4.75609	4.76237	4.63651	4.86144	4.75428	5.12914	5.53101	5.67092	5.97635	4.10892	4.4892	4.59107	4.81566	4.78795	4.83511	4.57761	4.81855	4.76281	4.6534	4.9865	4.8747	4.09384	4.82574	4.84573	4.99457	4.84007	4.84069	4.72177	4.9141	4.71191	4.72018	5.19704	4.41188	4.57369
GL50803_16815	7.08536	7.24975	7.25188	7.30607	7.37478	7.53353	7.6811	7.79644	7.83336	7.81991	6.76533	7.10439	7.14652	7.18315	7.16331	7.2679	7.23487	7.37992	7.37447	7.39968	7.53379	7.52825	7.17226	7.09023	7.1799	7.08423	7.20205	7.26762	7.49842	7.62384	7.68821	7.74223	7.7701	7.37886	6.89007
GL50803_88960	7.74011	8.30721	8.17649	8.24713	8.34775	8.46307	8.94846	9.33122	9.52787	9.45594	9.39807	7.76715	7.13597	7.60442	7.4107	7.51673	7.3792	7.55607	7.88872	7.43842	8.01583	8.38628	9.56906	6.84802	7.50622	7.54396	7.31691	7.09062	7.31468	7.96066	8.0581	8.00239	8.17896	8.87516	6.85489
GL50803_21053	7.57916	7.80283	7.86191	7.79478	7.73134	7.75212	7.62181	7.43553	7.4364	7.33225	7.23443	7.63373	7.15152	7.41107	7.36174	6.7613	6.48061	6.44165	6.38309	6.17225	6.42126	6.24198	8.36247	6.34767	6.78301	7.08038	6.96651	6.66311	6.61939	6.61686	6.54807	6.55109	6.65334	8.96933	6.65817
GL50803_16817	7.83799	7.68473	7.74256	7.64049	8.1812	8.17586	8.80041	9.04787	9.31339	9.36009	8.39071	7.92574	7.99955	7.98963	7.902	7.48408	7.45175	7.5591	7.50572	7.67319	8.32188	8.42405	8.24877	7.27073	7.26153	7.46249	7.10407	7.08672	7.19109	7.93489	7.69694	7.98134	8.23755	7.20335	7.30388
GL50803_60483	5.08444	4.95556	4.80142	4.87007	5.25592	5.28935	5.52035	5.64064	5.6927	5.73679	6.79026	4.8395	4.95814	4.75105	4.89751	4.96841	5.06125	5.27469	5.39636	5.49845	5.53621	5.67762	5.97672	5.16372	4.94846	4.70793	4.53369	4.77584	4.92026	5.16009	5.26657	5.32411	5.23176	5.39804	4.96697
GL50803_16818	7.2555	7.45995	7.57967	7.61748	7.61579	7.63979	7.43276	7.25942	7.18262	7.01432	6.85721	7.35714	7.14702	7.36459	7.53418	7.14509	7.1511	7.16388	7.14811	7.27724	7.30171	7.28493	6.60253	6.85165	7.27417	7.4446	7.51463	7.39994	7.49612	7.44445	7.56151	7.6487	7.46513	6.78997	6.98831
GL50803_6288	4.18892	4.80642	5.20253	5.5667	5.90202	6.12973	6.06614	6.05302	6.00047	5.90973	3.49926	4.59826	4.08919	4.73722	4.82712	4.94628	5.14441	5.42354	5.56695	5.77174	6.02024	6.02009	4.27721	4.55341	4.86257	5.11796	5.50276	5.66981	5.70704	6.20097	5.81503	6.08278	6.41066	4.71311	4.34458
GL50803_6289	8.18741	8.19584	8.38049	8.34492	8.29939	8.46048	8.25798	8.15832	8.16127	7.98875	7.26062	8.36534	7.98897	8.04738	8.04895	8.2794	8.36764	8.54673	8.90575	8.53718	8.67523	8.73783	7.49373	8.54351	8.03483	8.1104	8.2773	8.34768	8.63805	8.4912	8.72894	8.90989	8.43357	7.14286	8.31098
GL50803_88945	5.08444	4.9608	5.18786	5.34975	5.69063	5.636	5.88601	5.95799	6.01674	5.90653	5.13321	5.021	5.2505	5.19739	5.35958	5.42873	5.61262	5.59585	5.73916	5.91342	6.07961	5.95111	5.22457	5.50337	5.3696	5.27468	5.32065	5.59659	5.58381	5.98566	5.75684	6.02948	6.12388	5.02163	5.46865
GL50803_6291	5.807	5.87761	5.72954	5.7601	6.2277	6.34118	6.71673	6.9055	7.03276	6.98934	6.15918	5.96938	6.46798	6.33414	6.18057	6.33549	6.32769	6.51062	6.42293	6.55538	6.64353	6.76908	6.46231	6.05248	6.08578	5.91761	5.69499	5.82478	6.08438	6.45855	6.45507	6.76807	6.80513	6.16638	6.05711
GL50803_6292	4.96348	4.93441	5.00587	5.10706	5.40399	5.50953	5.58161	5.64064	5.59924	5.5729	4.23313	5.00943	5.27453	5.3506	5.39477	5.62532	5.68355	5.77083	5.80812	5.80145	5.79704	5.762	4.80092	5.30438	5.31646	5.13506	5.26936	5.3216	5.55018	5.60346	5.60844	5.69129	5.64628	4.43224	5.2741
GL50803_6294	5.06497	5.13772	5.15808	5.09174	5.0241	4.83506	4.59368	4.33309	4.49333	4.39003	3.63556	5.22283	5.25237	5.59412	5.4857	5.42553	5.36697	5.271	5.00205	4.97794	4.95948	5.03998	4.36084	5.20775	5.59795	5.7432	5.52399	5.46906	5.27203	5.07613	5.09126	5.06934	5.10433	4.58557	5.37687
GL50803_14161	4.69877	4.72256	4.54944	4.54192	4.38678	4.40619	4.38956	4.18569	4.07948	3.95484	3.39674	4.67642	4.75506	4.81302	4.83994	4.94182	4.76681	4.85108	4.77459	4.69622	4.53943	4.65794	4.15759	4.67296	4.95521	4.94211	4.89626	4.89769	4.84507	4.77336	4.95987	4.9932	4.61607	4.49812	4.8819
GL50803_16819	7.17719	7.36536	7.43813	7.32313	7.29051	7.156	7.14331	7.04439	7.16472	7.00138	6.39316	7.31406	7.25268	7.43312	7.4497	7.10221	7.03336	6.89177	6.75421	6.88757	6.89884	6.92298	6.20256	6.86247	7.30442	7.4204	7.27947	7.10938	7.03228	6.99127	6.94978	6.90217	7.00622	6.58999	7.16289
GL50803_16820	7.25764	7.14722	7.2104	7.1891	6.99783	7.04842	6.91957	6.94877	6.97674	7.06159	6.72711	7.45379	7.28716	7.085	7.38599	7.05596	6.98905	6.69008	6.71883	6.41345	6.53543	6.48736	5.8181	6.9962	7.08006	7.23953	7.30752	7.12791	6.8764	6.82643	6.88561	6.69057	6.77602	5.96445	7.38009
GL50803_13210	6.71254	6.70432	6.67444	6.73343	6.73912	6.86963	6.79447	6.70939	6.71339	6.54277	7.43601	6.91089	6.91979	6.719	6.73324	7.02779	7.20289	7.28054	7.3481	7.36858	7.35546	7.30882	6.98874	7.28644	6.92492	6.64739	6.83876	7.0449	7.37021	7.33581	7.33499	7.40561	7.10315	6.64045	7.04345
GL50803_16821	6.03798	6.19681	5.9524	5.84025	5.64849	5.54998	5.64182	5.58925	5.61072	5.83989	8.0935	6.3103	6.34595	6.34877	6.08579	6.11326	6.02527	5.93623	5.82096	5.83776	5.65883	5.84572	8.19218	6.27845	6.39285	6.20655	6.13253	6.03222	5.86405	5.7803	5.61664	5.43814	5.76427	8.23605	6.46278
GL50803_3062	7.97109	7.99826	7.80779	7.72653	7.55414	7.39581	7.22286	7.13461	7.22993	7.19082	8.6473	8.11765	8.28304	8.08336	8.02837	7.99499	7.9937	7.90133	7.75686	7.63312	7.3765	7.28444	9.51025	8.31119	8.34026	8.15692	8.04712	7.96413	7.66001	7.31223	7.28826	7.04157	6.89931	10.0008	8.29403
GL50803_3063	6.43297	6.30168	7.48387	8.15549	8.53288	8.81371	8.79766	8.70722	8.80972	8.53	8.31308	6.44522	6.63218	6.2846	7.14947	7.81411	8.08308	8.53156	8.91576	9.15433	8.99513	8.92111	9.69032	7.0482	6.8124	7.24348	8.41697	8.77279	9.13184	9.10243	9.15688	9.13082	8.92984	11.599	6.72541
GL50803_21048	8.28424	8.63136	8.82534	8.97968	8.81664	8.91199	8.71856	8.53169	8.46136	8.39155	8.42729	8.43855	8.04135	8.19812	8.55668	7.89545	7.90612	7.4865	7.7602	7.80403	8.05261	7.89073	7.44878	7.28554	8.0433	8.28021	8.44464	8.39882	8.07014	8.40622	7.98764	7.66923	8.48963	8.24135	7.60467
GL50803_13616	6.93596	6.88876	6.75325	6.78755	6.38616	6.33039	6.1403	6.04263	5.99061	5.78868	6.35417	6.80445	6.79756	6.86416	6.82896	6.5384	6.44824	6.23628	6.28148	6.21152	6.0083	5.81199	6.36215	6.51092	6.85871	6.74459	6.48787	6.30735	6.46552	6.03502	6.45888	6.34656	5.79167	6.60352	6.73237
GL50803_113038	8.64296	8.3772	8.52955	8.56301	8.42027	8.41473	8.11818	7.96262	7.78699	7.69413	8.43414	8.48816	6.93784	7.37803	7.209	7.09066	6.9765	7.00506	7.38219	6.37197	6.89884	7.13041	9.86935	7.3278	7.12362	7.23012	7.49822	7.151	7.14727	7.37547	7.47955	7.47595	7.32613	9.99765	7.47409
GL50803_16042	6.282	6.3058	6.21503	6.2151	6.08636	6.03664	6.02041	6.0051	5.88818	5.95069	6.51236	6.38203	6.40909	6.37759	6.30879	6.22956	6.10863	5.97194	5.89568	6.00779	5.98535	5.79828	5.84416	6.16649	6.3887	6.44031	6.16199	6.13814	6.03976	6.05409	5.96498	6.03179	5.96446	5.80179	6.26978
GL50803_90236	6.33579	6.82556	6.86993	6.89962	6.92516	6.9511	6.9396	6.80396	6.91324	6.82904	8.64171	6.42272	6.5261	6.92826	7.05034	6.8563	6.84565	6.72222	6.7996	6.82444	6.91299	6.84175	8.70146	6.59981	6.96167	7.21963	7.12239	7.05005	6.82719	6.95219	6.75669	6.60789	6.88424	9.3488	6.6305
GL50803_37620	6.74349	6.80532	6.83835	6.8587	6.83131	6.73694	6.57779	6.4124	6.4449	6.34819	6.3281	6.70468	6.58567	6.77693	6.9791	6.46015	6.5199	6.08986	6.29279	6.22985	6.52792	6.47448	6.48527	6.37564	6.83086	6.98281	6.88304	6.82547	6.6102	6.64825	6.45125	6.16078	6.59454	6.94683	6.64471
GL50803_14994	7.48616	7.75915	7.74356	7.65924	7.58053	7.46819	7.258	6.98055	7.07119	7.05052	7.22864	7.67679	7.54137	7.57128	7.75166	7.27501	7.23191	6.84222	6.89577	6.79766	6.96516	6.93932	6.9291	7.12359	7.56178	7.7612	7.64555	7.45492	7.11812	7.22055	7.06367	6.76738	7.24538	7.39365	7.3385
GL50803_9598	5.05514	4.99439	4.76237	4.94307	4.59506	4.54607	4.72981	4.94932	4.89893	5.13086	8.55642	5.44006	5.25237	4.83656	4.89751	5.10647	5.27973	5.13333	5.34	5.27661	5.22584	5.0022	7.24865	5.43414	4.99503	4.45571	4.85045	4.8798	4.99607	5.02004	4.97271	4.86961	4.5319	6.40488	5.29305
GL50803_14993	9.87894	10.1366	10.2581	10.233	10.3863	10.542	10.5659	10.6144	10.5853	10.4796	9.66698	9.90247	9.72172	9.99878	9.84501	9.77672	9.82259	9.92574	9.97799	10.0413	10.1917	10.1796	9.27272	9.40512	9.57604	9.73235	9.70521	9.72035	9.92041	10.045	10.0999	10.3199	10.2429	8.77773	9.45219
GL50803_28888	3.48404	3.06057	3.8997	4.48439	5.24548	5.63934	5.74451	5.99914	5.9707	5.66034	6.16092	3.47917	3.67153	3.01237	3.28303	4.27068	4.48137	5.1475	5.61361	5.89171	6.14429	6.00823	6.23247	3.80382	2.885	3.1372	3.97901	4.90529	5.6502	5.87256	6.16187	6.22372	6.17433	6.1085	3.25859
GL50803_9594	6.35194	6.09687	6.25075	6.13636	6.19228	6.19694	6.12803	6.07469	6.19323	6.13966	4.58877	6.25062	6.5437	6.324	6.30602	6.53543	6.68888	6.85584	6.81251	6.89964	6.795	6.70805	5.39736	6.81127	6.4433	6.29003	6.26839	6.38732	6.66177	6.60328	6.69088	6.72093	6.51926	4.71865	6.56118
GL50803_9593	7.57616	7.54087	7.66791	7.76247	7.90876	8.01629	8.33517	8.59721	8.76047	8.94883	7.41576	7.50123	7.85566	7.76811	7.83697	7.61044	7.55668	7.3592	7.45125	7.53887	7.75986	7.69997	6.80022	7.28017	7.65173	7.79454	7.57142	7.59896	7.44531	7.71688	7.53037	7.44814	7.78543	6.71438	7.60689
GL50803_121061	0.899976	1.05581	1.7574	1.65039	1.17081	1.42993	0.719642	0.967499	0.766931	0.279121	-1.46483	1.25453	-0.527332	0.576469	-0.210892	0.570687	-0.230787	0.193029	1.03661	-1.0507	0.0181142	1.46539	-0.421627	0.5892	0.441275	0.727965	1.15279	0.653747	0.874623	1.39538	0.899644	1.06427	0.625803	1.01455	0.554144
GL50803_137681	5.78337	5.51596	5.53005	5.44129	5.5969	5.61836	5.67171	5.72098	5.4869	5.68046	5.17854	5.80779	4.57925	4.96792	4.94576	4.8447	4.62986	4.68335	5.20721	4.34579	4.67846	4.97075	5.91042	4.94364	4.79148	5.17694	5.36114	4.83805	4.88081	4.82805	5.43529	5.25269	5.1474	6.39799	5.29775
GL50803_121062	1.02615	1.52053	1.02873	1.50367	1.33727	1.02311	1.28876	0.802253	0.994347	1.29652	-1.15694	0.818429	-0.089699	0.762772	-0.390941	1.19855	0.638393	1.3101	1.35176	-0.678388	0.816521	1.67202	0.334422	0.390902	0.540297	0.727965	1.18595	0.834454	1.11762	1.46906	1.38264	1.3274	1.55227	0.600189	0.635599
GL50803_16064	5.56341	5.77578	5.82551	5.78255	5.7743	5.71876	5.72155	5.85493	6.06554	6.04196	7.00296	5.70683	5.72572	5.97969	6.03316	6.16781	6.20821	6.10238	6.13038	6.15988	6.02617	6.03771	6.15129	6.12616	6.14892	6.04858	6.15364	6.0241	6.18117	6.12893	5.88461	5.58841	5.65909	5.83532	6.13533
GL50803_6942	5.66551	5.67899	5.61582	5.59958	5.48959	5.34661	5.21285	5.16677	5.19623	5.1436	4.25283	5.9208	6.08781	5.79575	5.84498	6.01891	5.98472	6.00456	5.82805	5.86381	5.61701	5.54265	4.55483	6.19245	6.11318	5.90894	6.10678	5.99709	5.87354	5.67656	5.67933	5.41003	5.27863	4.91472	6.25777
GL50803_21110	5.50501	5.80811	5.61582	5.57039	5.43002	5.42796	5.41825	5.28699	5.21891	5.25847	7.06742	5.63787	5.768	5.78772	5.6822	5.88692	5.88076	5.72432	5.63153	5.64224	5.49404	5.44921	6.01738	5.82187	5.94152	5.68779	5.7951	5.73665	5.72942	5.56057	5.51791	5.43117	5.22603	5.3054	5.94773
GL50803_14329	10.4431	10.5288	10.4497	10.32	9.93646	9.77435	9.59929	9.35822	9.35974	9.17772	10.0868	10.4774	10.6591	10.747	10.6568	10.6612	10.593	10.5498	10.2827	10.1707	9.81914	9.7992	9.58823	10.3599	10.4954	10.4736	10.2222	10.1348	9.93656	9.55803	9.78482	9.74206	9.38352	8.89088	10.3361
GL50803_6939	7.92594	8.0703	8.09356	8.01019	7.82506	7.75192	7.62509	7.62105	7.63573	7.71805	7.6835	8.17133	8.0622	8.07568	8.07792	7.65067	7.48687	7.24285	7.07437	7.06087	7.06877	7.01598	6.55597	7.20802	7.66859	7.92745	7.52641	7.33764	7.21928	7.13495	7.1041	7.15762	7.10627	6.58393	7.60909
GL50803_16065	4.97656	4.80933	4.78982	4.84591	4.98449	5.08797	5.31018	5.26731	5.35827	5.40472	4.6934	5.14672	5.37197	4.90497	5.16746	5.19168	5.28137	5.49653	5.43027	5.61739	5.73757	5.69844	5.01683	5.3665	4.89567	5.05197	5.11003	5.21556	5.25215	5.61026	5.26483	5.58684	5.68854	4.78349	5.31486
GL50803_14328	5.12965	5.04459	5.06806	5.00165	5.05549	4.85816	5.1475	5.09266	5.22266	5.1917	3.76009	5.19858	5.38562	5.12701	5.23697	5.24521	5.339	5.46131	5.47066	5.43982	5.38198	5.36798	4.19857	5.52017	5.16176	4.94211	4.97426	5.15734	5.15822	5.28774	5.05147	5.22673	5.18528	4.08315	5.33328
GL50803_14327	6.91369	6.8963	6.83176	6.78755	6.70906	6.70226	6.76308	6.705	6.78672	6.76395	6.09333	6.89526	7.18603	6.97262	6.92657	7.14557	7.27848	7.33949	7.27897	7.44275	7.22954	7.32374	6.40218	7.28376	7.04149	6.92807	6.83746	6.88818	7.09295	7.03892	7.16129	7.4158	6.99784	6.16435	7.01233
GL50803_14326	4.81405	4.85224	4.75044	4.86708	4.88583	4.76195	4.68026	4.73102	4.66011	4.62358	4.9801	4.79437	4.93049	4.91238	4.89996	4.91928	5.06315	5.008	5.12218	5.25351	5.02491	5.03765	4.80756	5.23391	5.00156	5.18517	5.01404	5.02174	5.18132	4.9119	5.1714	5.19412	4.84009	5.3054	5.09309
GL50803_6933	6.87787	7.20244	7.26242	7.15263	7.14654	7.05124	7.07784	7.05304	7.02795	7.1055	6.0583	7.04159	7.08984	7.32538	7.44005	7.0683	7.10755	6.87605	6.94221	7.05008	6.94902	6.90005	6.44751	6.96475	7.22059	7.33557	7.22267	7.10169	7.04231	7.01452	6.94436	6.9047	6.93017	7.284	7.11265
GL50803_18713	5.55994	5.55977	5.58705	5.57039	5.77139	5.85126	5.85161	5.91182	6.01458	5.87633	8.63609	5.2565	5.60556	5.48248	5.5789	5.66514	5.87644	6.08776	6.14065	6.41345	6.40951	6.32467	8.18964	5.56796	5.55568	5.44031	5.41632	5.62448	5.90048	5.92913	6.04111	6.08166	5.8173	7.30164	5.31486
GL50803_21116	5.48501	5.47628	5.62891	5.66146	5.58866	5.62846	5.39795	5.40518	5.41012	5.24671	4.92387	5.57804	5.64153	5.6805	5.61068	5.76331	5.7987	5.90678	6.02213	6.11226	5.94084	5.97325	5.49107	5.77809	5.67216	5.67907	5.62114	5.69925	5.7566	5.71492	5.76054	5.98491	5.49889	5.01264	5.62017
GL50803_9355	7.86884	8.34476	8.76041	9.00632	9.17064	9.40657	9.31331	9.1744	9.22696	8.88606	7.72287	8.02531	7.56704	7.91817	7.9814	8.07541	7.95173	8.17724	8.59108	8.2467	8.53713	8.32184	8.01636	7.18426	7.78895	7.97393	8.26838	8.35371	8.58956	8.5095	8.78825	8.85733	8.5102	7.56789	7.42015
GL50803_9354	6.94464	7.00234	7.28946	7.41734	7.66477	7.71445	7.8277	7.83305	7.9767	8.0422	7.83549	7.08963	7.16592	7.19737	7.46468	7.64553	7.71319	7.88632	7.70047	7.87854	7.94529	7.9036	7.04881	7.32953	7.1296	7.59545	7.83973	7.93565	7.907	8.08986	7.8416	7.80633	8.08109	7.25476	7.50558
GL50803_9353	6.74731	6.8963	6.93108	6.94937	6.94529	6.97836	6.94194	6.91691	7.02795	6.92122	7.20355	6.79707	7.05024	6.99836	6.99581	7.24769	7.44484	7.55569	7.47039	7.67319	7.37603	7.36665	6.75285	7.28956	7.16688	7.08863	7.15573	7.31547	7.64658	7.37547	7.52457	7.46061	7.08797	6.92064	7.12195
GL50803_9352	4.35041	4.78591	5.80259	6.44057	7.06404	7.46819	7.77228	7.93419	7.96444	7.98673	7.76921	4.58273	4.64877	4.69491	5.4857	5.81915	6.18395	6.46609	6.97385	7.24966	7.54292	7.57484	7.34536	4.62293	4.74293	5.46757	6.30375	6.83876	7.26822	7.6776	7.5347	7.80363	7.86161	7.19841	4.66625
GL50803_21118	10.1011	9.77694	9.82161	9.75173	9.92858	9.8496	10.1461	10.1928	10.2901	10.2846	9.07329	9.84244	9.3864	9.38502	9.09847	9.06066	9.00236	9.04775	9.08792	8.90541	9.37953	9.53696	9.19541	9.31817	8.83947	8.98929	9.18087	9.13669	9.10415	9.47739	9.41764	9.57247	9.56709	8.45173	9.22329
GL50803_9349	6.46952	6.21227	6.23229	6.26151	6.16707	6.14565	6.16653	5.90929	6.05507	5.8785	5.25543	6.53672	6.6814	6.37044	6.31339	6.58782	6.66717	6.76027	6.82177	6.91047	6.70914	6.75353	5.93792	6.80878	6.25113	6.15405	6.16615	6.36177	6.40464	6.39224	6.49566	6.4844	6.12388	5.26812	6.6199
GL50803_9348	8.56194	8.78414	8.74045	8.56694	8.25769	8.10825	7.90524	7.69879	7.77108	7.57021	6.21213	8.68953	8.9486	9.13332	9.0982	8.83124	8.80091	8.45711	8.33054	8.22059	7.97349	7.81987	6.55005	8.49121	8.94702	8.99002	8.60015	8.45147	8.15892	7.71688	7.74013	7.59586	7.4102	6.593	8.8121
GL50803_137680	6.51776	6.57023	6.4799	6.38402	6.44114	6.34118	6.36776	6.388	6.55969	6.50025	7.43025	6.34016	6.65137	6.66303	6.641	6.87574	6.88273	7.09399	6.9872	7.08323	7.04677	7.05744	8.47362	7.07429	6.89248	6.74807	6.87098	6.89646	7.0291	6.99854	6.95949	7.05922	6.77406	8.83462	6.61552
GL50803_50124	4.74538	4.71017	4.62541	4.64003	4.59835	4.64234	4.66051	4.68725	4.42668	4.69948	3.12471	4.69676	3.57363	4.0708	3.91226	3.90829	3.65113	4.20689	4.76281	3.44072	4.27037	4.69689	4.15759	4.50513	4.10658	4.39668	4.39876	4.19911	3.8741	4.61197	4.41229	4.49443	4.74716	4.08315	4.24102
GL50803_9336	5.47398	5.24895	5.33088	5.46923	5.52453	5.6192	5.91962	6.17846	6.20369	6.29291	7.67804	5.55594	5.76016	5.42669	5.43758	5.75824	5.92325	6.09509	6.09205	6.46543	6.31094	6.32945	6.90918	5.94461	5.43861	5.34434	5.50605	5.72095	5.95066	6.01773	6.03806	6.12663	6.03167	6.35775	5.71925
GL50803_16387	10.3093	10.4103	10.4055	10.283	10.1032	9.95995	9.90057	9.77979	9.84005	9.73197	9.79006	10.3729	10.3512	10.6097	10.6069	10.5795	10.481	10.5644	10.4286	10.2436	10.1597	10.162	9.6354	10.3796	10.4032	10.5544	10.3593	10.1983	10.1743	10.0083	10.1251	10.2536	9.89024	8.82566	10.4233
GL50803_16386	6.62219	6.75117	6.75425	6.80567	7.01021	7.15512	7.43608	7.67695	7.63713	7.74068	6.90156	6.61668	6.78604	6.87998	6.93436	6.91215	6.98254	7.06815	7.20417	7.27195	7.43205	7.59362	7.3385	6.90262	6.9209	6.94937	6.92599	7.07442	7.25103	7.37627	7.47429	7.62978	7.67939	7.33537	6.83993
GL50803_100845	5.73491	6.02617	6.01189	6.09339	6.21599	6.33451	6.53507	6.63223	6.69395	6.77744	5.35296	5.74779	5.90809	5.98555	5.94807	5.98458	6.08169	5.97762	6.12233	6.31473	6.35213	6.47275	5.16378	5.73426	6.13711	6.07762	6.08607	6.10663	6.24837	6.38987	6.16374	6.4717	6.69817	5.74323	5.83586
GL50803_31530	5.87984	6.03365	6.38538	6.49984	6.60436	6.84781	6.83341	6.77079	6.78608	6.7908	4.79094	5.89085	6.14808	6.11847	6.20754	6.58066	6.74916	6.70179	6.96809	7.01352	6.96145	6.80998	5.10031	6.16163	6.14401	6.33326	6.49036	6.82947	6.99037	6.9043	6.85935	7.00032	6.95923	5.807	6.10169
GL50803_12889	4.60752	4.64333	4.69344	4.73518	4.81139	4.78924	5.04898	5.32747	5.34458	5.45522	4.40144	4.745	5.04021	4.94884	4.83226	5.27924	5.24666	5.35889	5.30995	5.32174	5.4629	5.51441	4.60142	5.28127	5.03802	5.0384	5.24793	5.53096	5.5722	5.49594	5.5511	5.92408	5.7826	5.37368	5.14791
GL50803_16384	6.23704	6.25553	6.22512	6.24659	5.98213	5.97063	5.88601	5.67541	5.98621	5.73438	7.44246	6.43055	6.50829	6.34968	6.25714	6.44051	6.41439	6.50198	6.45988	6.62004	6.44713	6.39105	8.42101	6.67129	6.41177	6.13399	6.18678	6.27741	6.40382	6.2627	6.24976	6.35211	5.99059	8.93228	6.3276
GL50803_112584	5.20496	5.35819	5.37815	5.46329	5.60018	5.62678	5.60393	5.55557	5.56571	5.58763	5.26839	5.29703	4.4968	4.94403	4.76931	4.85898	4.74566	4.89013	5.32205	4.85816	5.21342	5.44745	5.02255	5.05892	4.92804	5.18927	5.46779	5.23579	5.17366	5.52358	5.28728	5.29173	5.63911	5.73232	5.14269
GL50803_7778	7.61517	7.47422	7.45783	7.46868	7.25037	7.31831	7.14483	7.12316	7.09285	7.01976	9.06774	7.67533	7.71045	7.50263	7.45763	7.77103	7.76433	7.8751	7.7775	7.7612	7.54952	7.60548	8.04333	7.93227	7.61989	7.42127	7.39432	7.38869	7.54927	7.39844	7.50776	7.60596	7.1881	7.56636	7.77444
GL50803_41512	9.33734	9.16343	9.02479	9.11646	8.47444	8.37174	8.00701	7.70282	7.5886	7.46866	10.2737	9.44694	8.0872	8.26037	8.27043	7.8503	7.64913	7.28787	7.30763	6.98197	6.96763	6.66032	7.73919	7.6943	7.63117	7.78001	7.84818	7.53997	7.43052	7.05745	7.18952	6.88632	6.75628	7.52112	7.93841
GL50803_14543	6.99951	7.02314	6.89542	6.78119	6.54349	6.45963	6.18639	5.99675	6.13776	6.0371	6.11681	7.13346	7.26887	7.09371	7.06024	7.08155	6.98454	6.91325	6.74076	6.63594	6.38018	6.29568	7.32352	7.14048	7.11009	7.23607	7.18421	7.10664	6.83146	6.51545	6.53803	6.36864	6.24872	8.12835	7.44931
GL50803_14544	3.82805	3.85741	4.04348	3.88114	4.18755	4.1473	3.97118	3.87833	3.97229	3.90012	2.78919	3.8551	4.0682	3.99843	4.03778	4.34019	4.24055	4.33272	4.23277	4.29795	4.18813	4.11923	3.24633	4.09637	4.19282	4.16659	4.24204	4.35524	4.27231	4.24688	4.04589	4.0693	4.32239	3.29092	4.16075
GL50803_14545	6.1392	6.27669	6.17395	6.06751	6.0169	5.99167	5.94549	5.88882	6.08213	6.05935	5.14731	6.07416	6.21455	6.27026	6.13552	6.08924	5.93886	6.03101	5.90643	5.81487	5.76477	5.77186	5.60978	5.93211	6.1232	6.10499	5.89625	5.85649	5.84488	5.7803	5.82804	5.94994	5.58941	5.0036	6.04132
GL50803_14546	6.36394	5.90911	5.90477	5.89574	5.9465	5.99558	5.86399	5.73108	5.73003	5.77237	4.40731	6.33923	6.48867	6.01337	6.04096	6.2102	6.19526	6.04297	6.19097	5.96357	5.78869	5.68658	4.77405	6.22355	6.0724	5.75983	5.70932	5.846	5.67483	5.38294	5.59604	5.61482	5.4006	4.35612	6.40297
GL50803_14547	7.6421	7.2271	7.06951	7.19808	7.57804	7.51866	7.59903	7.58374	7.73842	7.67639	8.12235	7.35532	7.77244	7.11633	7.15153	7.3757	7.56677	7.81232	7.70663	7.983	8.00235	7.99029	10.0927	7.95968	7.30178	6.90333	7.09155	7.41865	7.58509	7.63689	7.81303	8.00914	7.72918	10.5163	7.54498
GL50803_7789	9.52959	9.59951	9.44383	9.42039	9.78485	9.8194	10.1766	10.3095	10.4716	10.4457	10.9511	9.41101	9.49195	9.53516	9.41701	9.54612	9.53954	9.56371	9.65732	9.54194	10.0187	10.1201	10.3292	9.48285	9.60769	9.3193	9.14509	9.20948	9.29125	9.62151	9.62373	9.71745	9.75482	9.68069	9.35144
GL50803_7790	4.49926	4.33988	4.26084	4.42855	4.43533	4.4295	4.39639	4.29082	4.30827	4.1333	3.0813	4.51234	4.53096	4.2875	4.30152	4.54837	4.52341	4.64961	4.78336	4.64796	4.56246	4.62413	3.79296	4.56229	4.36817	4.21161	4.07949	4.33287	4.49462	4.40854	4.40914	4.66771	4.39566	3.29092	4.45529
GL50803_7791	7.37741	7.56128	7.59475	7.595	7.58716	7.635	7.65283	7.57255	7.71301	7.6457	6.74461	7.43834	7.60106	7.62146	7.78685	7.58561	7.68476	7.65292	7.58855	7.74759	7.68987	7.70182	7.11588	7.50588	7.72953	7.71433	7.715	7.65901	7.65279	7.70899	7.63805	7.6547	7.61364	7.42362	7.61067
GL50803_7792	3.87911	4.16484	3.9768	3.8692	3.95632	3.89993	3.98485	3.85214	4.04604	4.15862	2.80707	4.12758	4.31271	4.37228	4.32724	4.28837	4.36598	4.2375	4.25396	4.36913	4.27037	4.13678	2.99035	4.59148	4.42758	4.34985	4.29239	4.26361	4.15658	4.17898	3.99225	4.03749	4.39226	3.18289	4.43268
GL50803_16192	7.26299	7.33844	7.22484	7.2135	6.96958	6.89602	6.92194	6.90613	6.96839	6.92281	5.88188	7.40738	7.53603	7.49237	7.4333	7.35191	7.23655	7.06015	6.94677	6.89333	6.80951	6.6709	6.02024	7.29711	7.50698	7.53191	7.36747	7.28326	7.12955	6.98134	7.0029	6.97235	6.74498	5.91947	7.46088
GL50803_86498	5.61787	5.61065	5.55769	5.48692	5.52625	5.42119	5.7324	5.98234	6.1437	6.30267	4.51999	5.69388	6.02818	5.70202	5.85006	5.8409	5.85356	5.67625	5.58043	5.6477	5.60121	5.67912	4.02714	5.89043	5.86717	5.77081	5.70217	5.65185	5.5233	5.63181	5.30769	5.25664	5.53948	4.33465	5.98221
GL50803_36426	6.5627	6.56938	6.63282	6.47347	6.19011	5.94322	5.72155	5.25537	5.32728	5.24671	5.77921	6.5874	6.43228	6.4284	6.49136	5.96381	5.73215	5.471	5.314	5.24632	5.05771	4.9683	7.22653	5.70116	5.92901	6.03271	5.82699	5.58401	5.41374	5.22355	5.11268	5.04669	5.11677	7.53217	5.92158
GL50803_86468	8.84338	8.00176	8.11658	7.9831	7.75801	7.6327	7.37337	7.12316	7.10812	6.99638	7.08034	8.69767	8.1169	7.43612	7.21048	7.18672	7.11673	7.22291	7.34119	6.65302	6.77119	6.81134	8.93237	8.29442	7.04043	7.25477	7.44485	7.09672	7.15117	7.04094	7.24481	6.96754	6.86655	9.13509	8.16236
GL50803_137679	6.66888	6.78035	6.49308	6.49013	6.43748	6.47418	6.42571	6.35294	6.29371	6.17554	5.01513	6.5796	5.99297	6.43955	6.23012	6.22681	6.1242	6.38723	6.62596	6.17793	6.56831	6.8168	6.41527	6.45562	6.54889	6.31743	6.43454	6.34137	6.46316	6.72419	6.84429	7.01673	6.63904	5.78869	6.36167
GL50803_113268	4.5137	4.87184	4.69344	4.95724	5.06739	5.08797	4.85915	4.77907	4.29409	4.34662	3.12471	4.24273	3.02139	4.18526	3.69234	3.49809	3.08215	2.8641	3.87612	2.12685	2.94408	3.45945	3.63769	2.78952	3.74592	4.03158	4.14419	3.27138	3.58739	3.83331	3.78951	3.25061	3.70685	4.03069	3.62554
GL50803_50127	5.96371	6.17557	6.1454	6.15246	6.21278	6.2155	5.83535	5.81888	5.16152	5.22461	5.08273	5.79572	5.09313	5.95122	5.8219	5.30901	5.01485	4.85108	5.36942	4.48048	4.83799	4.72616	6.20508	4.84526	5.58786	5.69357	5.65262	5.21352	5.1288	5.12633	5.41975	5.02368	5.02519	6.33809	5.40618
GL50803_41401	2.28659	2.88433	2.36973	2.55363	3.07366	2.81574	2.84236	2.52725	1.5659	2.06611	1.33167	2.14037	1.78564	2.486	2.03839	1.85955	1.43365	1.25132	1.11283	1.12981	1.58056	1.0499	1.98583	1.33268	1.96872	2.37169	2.01183	1.63006	1.32552	1.51616	1.57453	1.16864	1.45115	2.57392	1.66631
GL50803_103944	1.61347	2.09754	1.69239	1.56416	1.67245	1.50501	1.34638	1.73596	1.19075	1.18828	0.481828	1.01637	1.92294	2.71778	1.84841	1.84049	1.43365	1.3101	1.73608	0.817136	1.50104	0.808564	1.55204	0.843349	1.91438	1.56077	1.28109	1.20665	1.48261	1.20725	1.55189	1.16864	1.83916	1.69186	0.855544
GL50803_7198	1.47281	2.18966	1.9365	2.16182	2.22478	2.46342	1.65079	2.0808	1.44282	1.85219	1.33167	1.15723	1.18109	1.64875	1.62955	1.19855	0.717778	0.526214	1.71178	0.365286	1.60612	1.5724	1.27383	1.2472	1.43742	1.77226	1.85573	1.67818	1.43212	1.82759	0.899644	1.0999	1.69179	1.15187	1.4356
GL50803_7195	9.69793	9.82342	10.0664	10.192	10.2982	10.4467	10.2479	9.91859	9.82696	9.47793	7.78339	10.0527	10.0655	10.1565	10.368	9.89064	9.8006	9.58078	9.63052	9.72025	9.80015	9.49687	8.32305	9.04154	9.31435	9.74372	9.64592	9.56708	9.66569	9.58702	9.74148	9.72004	9.49171	8.4785	9.72192
GL50803_7192	6.36095	6.53993	6.4895	6.50177	6.58876	6.45396	6.25851	5.97508	5.83165	5.71501	4.40731	6.68663	6.71758	6.66303	6.91146	6.54724	6.61109	6.43093	6.3773	6.44361	6.46295	6.40469	5.38409	6.39895	6.63613	6.77286	6.6143	6.59582	6.32213	6.55264	6.16654	6.0341	6.42573	6.26239	6.66849
GL50803_14390	8.08451	7.90894	7.97898	7.96042	7.96835	7.91239	7.94016	7.84505	7.95715	7.92061	7.48472	8.04017	8.0989	7.98495	8.03563	7.67374	7.58342	7.64009	7.49952	7.71185	7.7705	7.8076	7.3212	7.69026	7.59707	7.87403	7.74278	7.71089	7.7191	7.80961	7.70016	7.66812	7.82481	7.54158	7.89203
GL50803_7190	2.57511	1.82626	2.09581	1.70513	2.25838	2.29595	2.89157	2.90894	3.05926	2.93545	3.27357	2.27013	2.48838	1.74035	2.22201	2.40498	2.28054	2.78342	2.61204	2.85004	3.03158	3.07874	3.62271	2.4755	1.67387	1.56077	1.58445	2.23947	2.29536	2.47792	2.27292	2.56291	2.64574	3.6909	2.3118
GL50803_7188	10.0941	9.90567	9.74855	9.73168	9.44363	9.43583	9.17853	8.97981	9.03044	8.94325	8.9999	10.269	9.5612	9.60803	9.4169	9.26158	9.13288	9.04329	8.85932	8.80018	8.77475	8.96105	10.6132	9.25731	9.21563	9.28751	9.16654	8.99132	8.88427	8.87343	9.01035	9.21029	9.08662	11.0418	9.51155
GL50803_17015	3.34568	3.16411	3.17655	3.4151	3.43122	3.72569	4.15575	4.50092	4.65734	4.8313	5.59083	3.44522	3.67708	2.95616	3.13273	3.57507	3.75828	3.93073	3.77419	4.32207	4.38556	4.62724	5.55559	3.73222	3.12724	3.01322	3.13576	3.66075	3.89755	4.30169	4.18109	4.48098	4.74449	4.66803	3.5329
GL50803_6170	6.76703	6.90311	7.03715	6.98092	7.10617	7.16818	7.42651	7.77499	7.85525	8.00878	8.46578	6.72321	6.8477	6.97968	6.94627	7.05957	7.07541	7.26066	7.20526	7.29781	7.24386	7.15752	7.6348	7.00762	6.96835	7.00739	6.95333	7.06709	7.15895	7.15741	7.24172	7.15709	7.03981	7.01142	6.90349
GL50803_6171	9.99496	9.9652	10.0585	9.94334	9.70248	9.56002	9.4506	9.38072	9.40537	9.35404	10.5125	10.0966	9.42891	9.82201	9.85925	9.92957	9.73571	9.94948	10.0658	9.19816	9.46932	9.59612	9.43453	9.95811	9.77405	10.1041	10.0716	9.75949	9.81161	9.63266	9.88789	9.66738	9.51949	8.76574	10.0111
GL50803_17014	5.99233	5.98048	6.03174	5.93778	5.93486	6.01497	5.97547	5.92193	6.05717	5.98446	5.50855	5.97891	6.15407	5.96434	5.90723	5.94831	5.98271	6.02005	6.06233	6.15125	6.20515	6.11608	5.78484	6.12815	6.07859	6.04293	6.06283	6.11539	6.14048	6.15707	6.17397	6.16709	6.11565	5.91707	6.14406
GL50803_6174	4.62091	4.46681	4.45951	4.26962	4.49995	4.49726	4.66335	4.69021	4.80209	4.81774	3.91649	4.52214	4.75506	4.35064	4.30152	4.39675	4.68522	4.85848	4.75688	4.82478	4.75758	4.81329	4.31498	4.75008	4.45004	4.49928	4.26162	4.38454	4.49462	4.47859	4.60876	4.75133	4.43592	4.4187	4.65652
[truncated: 3,650 more rows]

## Sheet: log2 fold change
Geneid	Description	Function	T1	3.5h	7h	10.5h	14h	17.5h	21h	24.5h	28h	31.5h	Cyst	T2
[truncated: 5,320 more rows]
