# Supplementary material for: A Detailed Gene Expression Map of Giardia Encystation
Source: Genes (Basel). 2021 Nov 30;12(12):1932. doi: 10.3390/genes12121932 (PMC8700996; doi:10.3390/genes12121932)
Supplement: Supplementary file 1 [file genes-12-01932-s001.zip › Table S2 Rev 1 GO terms.xlsx]

## Sheet: Summary 
Supplementary table S2. Functional cluster analysis using DAVID
Summary of the clusters showing up and down regulated during encystation in Giardia
	Up					Down
	10.5-14 hours					17.5-21 hours
	Cluster	Enrichment Score:	No. genes			Cluster	Enrichment Score:	No. genes
	Fatty acid metabolism	1.91	3			Nucleotide binding	5.46	35
						Cluster	Enrichment Score:	No. genes
	17.5-21 hours					Protein biosynthesis	2.9	8
	Cluster	Enrichment Score:	No. genes			Cluster	Enrichment Score:	No. genes
	Fatty acid metabolism	1.39	3			Regulation of gene expression	1.96	3
						Cluster	Enrichment Score:	No. genes
	24.5-28 hours					ATP binding	1.55	73
	Cluster	Enrichment Score:	No. genes			24.5-28 hours
	Lipid metabolic process	1.7	7
						Cluster	Enrichment Score:	No. genes
	Cluster	Enrichment Score:	No. genes			Nucleotide binding	4.53	49
	ATP binding	1.52	90
						Cluster	Enrichment Score:	No. genes
						Protein folding	4.45	10
	31-Cyst
	Cluster	Enrichment Score:	No. genes			Cluster	Enrichment Score:	No. genes
	EGF-like	12.4	102			Protein phosporylation	1.81	24
	Cluster	Enrichment Score:	No. genes
	Aminoacid transporter	1.47	9			31-Cyst
						Cluster	Enrichment Score:	No. genes
						Translation	4.23	41
						Cluster	Enrichment Score:	No. genes
						ATP binding	3.6	237
						Cluster	Enrichment Score:	No. genes
						Protein biosynthesis	1.83	23

## Sheet: 10.5-14h
Up and down regulated clusters 10.5-14 hours
UP					DOWN
Cluster	Enrichment Score:	No. genes
Fatty acid metabolism	1.91	3
	Gene ID	Product description
	GL50803_14626	Oxidoreductase, short chain dehydrogenase/reductase family
	GL50803_7512	Protein tyrosine phosphatase-like protein
	GL50803_88581	Synaptic glycoprotein SC2

## Sheet: 17.5-21h 
Up and down regulated clusters 17.5-21 hours
UP				DOWN
Cluster	Enrichment Score:	No. genes		Cluster	Enrichment Score:	No. genes
Fatty acid metabolism	1.39	3		Nucleotide binding	5.46	35
	Gene ID	Product description			Gene ID	Product description
	GL50803_14626	Oxidoreductase, short chain dehydrogenase/reductase family			GL50803_16575	ABC transporter family protein
	GL50803_7512	Protein tyrosine phosphatase-like protein			GL50803_17165	ABC transporter, ATP-binding protein
	GL50803_88581	Synaptic glycoprotein SC2			GL50803_15164	ATP-binding protein
					GL50803_92739	ATP-dependent RNA helicase A
					GL50803_17387	ATP-dependent RNA helicase DHR1, putative
					GL50803_16887	ATP-dependent RNA helicase HAS1, putative
					GL50803_16376	ATP-dependent RNA helicase p47, putative
					GL50803_13220	ATP-dependent RNA helicase(
					GL50803_13791	ATP-dependent RNA helicase
					GL50803_15048	ATP-dependent RNA helicase-like protein
					GL50803_96460	Alanyl-tRNA synthetase
					GL50803_10521	Arginyl-tRNA synthetase
					GL50803_17587	CTP synthase
					GL50803_16453	Carbamate kinase
					GL50803_34684	DEAD box RNA helicase Vasa
					GL50803_114246	GTP-binding protein, putative
					GL50803_9348	Glutaminyl-tRNA synthetase
					GL50803_17146	Helicase
					GL50803_16235	Kinase, CAMK CAMKL
					GL50803_22850	Kinase, CMGC MAPK
					GL50803_104150	Kinase, PLK
					GL50803_16945	Kinesin-13
					GL50803_22204	Methionyl-tRNA synthetase
					GL50803_7662	RNase L inhibitor
					GL50803_16830	Spindle pole protein, putative
					GL50803_17482	TCP-1 chaperonin subunit alpha
					GL50803_91919	TCP-1 chaperonin subunit alpha
					GL50803_11397	TCP-1 chaperonin subunit beta
					GL50803_11992	TCP-1 chaperonin subunit epsilon
					GL50803_16124	TCP-1 chaperonin subunit eta
					GL50803_17411	TCP-1 chaperonin subunit gamma
					GL50803_13500	TCP-1 chaperonin subunit theta
					GL50803_10231	TCP-1 chaperonin subunit zeta
					GL50803_10255	Translation initiation factor eIF-4A, putative
					GL50803_35428	Valine-tRNA ligase
				DOWN
				Cluster	Enrichment Score:	No. genes
				Protein biosynthesis	2.9	8
					Gene ID	Product description
					GL50803_96460	Alanyl-tRNA synthetase
					GL50803_10521	Arginyl-tRNA synthetase
					GL50803_91398	Eukaryotic translation initiation factor 2 beta subunit
					GL50803_9348	Glutaminyl-tRNA synthetase
					GL50803_22204	Methionyl-tRNA synthetase
					GL50803_14606	Translation initiation factor 6
					GL50803_10255	Translation initiation factor eIF-4A, putative
					GL50803_35428	Valine-tRNA ligase
				DOWN
				Cluster	Enrichment Score:	No. genes
				Regulation of gene expression	1.96	3
					Gene ID	Product description
					GL50803_16887	ATP-dependent RNA helicase HAS1, putative
					GL50803_16376	ATP-dependent RNA helicase p47, putative
					GL50803_10255	Translation initiation factor eIF-4A, putative
				DOWN
				Cluster	Enrichment Score:	No. genes
				ATP binding	1.55	73
					Gene ID	Product description
					GL50803_16575	ABC transporter family protein
					GL50803_17165	ABC transporter, ATP-binding protein
					GL50803_15164	ATP-binding protein
					GL50803_92739	ATP-dependent RNA helicase A
					GL50803_17387	ATP-dependent RNA helicase DHR1, putative
					GL50803_16887	ATP-dependent RNA helicase HAS1, putative
					GL50803_16376	ATP-dependent RNA helicase p47, putative
					GL50803_13220	ATP-dependent RNA helicase
					GL50803_13791	ATP-dependent RNA helicase
					GL50803_15048	ATP-dependent RNA helicase-like protein
					GL50803_90402	Adenylate kinase
					GL50803_96460	Alanyl-tRNA synthetase
					GL50803_10521	Arginyl-tRNA synthetase
					GL50803_17587	CTP synthase
					GL50803_103891	Chaperonin 60
					GL50803_34684	DEAD box RNA helicase Vasa
					GL50803_114246	GTP-binding protein, putative
					GL50803_9348	Glutaminyl-tRNA synthetase
					GL50803_17146	Helicase
					GL50803_16235	Kinase, CAMK CAMKL
					GL50803_96363	Kinase, CAMKK
					GL50803_22850	Kinase, CMGC MAPK
					GL50803_13981	Kinase, NEK
					GL50803_14835	Kinase, NEK
					GL50803_15953	Kinase, NEK
					GL50803_16279	Kinase, NEK
					GL50803_16967	Kinase, NEK
					GL50803_24321	Kinase, NEK
					GL50803_4912	Kinase, NEK
					GL50803_5346	Kinase, NEK
					GL50803_87945	Kinase, NEK
					GL50803_92498	Kinase, NEK
					GL50803_95717	Kinase, NEK
					GL50803_102034	Kinase, NEK-frag
					GL50803_12095	Kinase, NEK-frag
					GL50803_13479	Kinase, NEK-frag
					GL50803_14786	Kinase, NEK-frag
					GL50803_16733	Kinase, NEK-frag
					GL50803_16839	Kinase, NEK-frag
					GL50803_5489	Kinase, NEK-frag
					GL50803_15035	Kinase, NEK-like
					GL50803_7653	Kinase, NEK-like
					GL50803_6346	Kinase, Nek-like
					GL50803_104150	Kinase, PLK
					GL50803_10609	Kinase, STE STE20
					GL50803_15514	Kinase, STE STE20
					GL50803_16945	Kinesin-13
					GL50803_14004	Long-flagella protein, kinase, CMGC RCK
					GL50803_16766	Lysyl-tRNA synthetase
					GL50803_22204	Methionyl-tRNA synthetase
					GL50803_34058	Mismatch repair protein
					GL50803_14277	N-acetyltransferase-like protein
					GL50803_12162	Phenylalanyl-tRNA synthetase alpha chain
					GL50803_16760	Phenylalanyl-tRNA synthetase beta chain
					GL50803_7662	RNase L inhibitor
					GL50803_5659	S-adenosylmethionine synthetase
					GL50803_5811	Serine/threonine protein kinase
					GL50803_101501	Seryl-tRNA synthetase
					GL50803_16830	Spindle pole protein, putative
					GL50803_17482	TCP-1 chaperonin subunit alpha
					GL50803_91919	TCP-1 chaperonin subunit alpha
					GL50803_11397	TCP-1 chaperonin subunit beta
					GL50803_11992	TCP-1 chaperonin subunit epsilon
					GL50803_16124	TCP-1 chaperonin subunit eta
					GL50803_17411	TCP-1 chaperonin subunit gamma
					GL50803_13500	TCP-1 chaperonin subunit theta
					GL50803_10231	TCP-1 chaperonin subunit zeta
					GL50803_42442	Transitional endoplasmic reticulum ATPase
					GL50803_10255	Translation initiation factor eIF-4A, putative
					GL50803_8217	Uridine kinase
					GL50803_7532	Vacuolar ATP synthase catalytic subunit A
					GL50803_12216	Vacuolar ATP synthase subunit B
					GL50803_35428	Valine-tRNA ligase

## Sheet: 24.5-28h 
Up and down regulated clusters 24.5-28 hours
UP				DOWN
Cluster	Enrichment Score:	No. genes		Cluster	Enrichment Score:	No. genes
Lipid metabolic process	1.7	7		Nucleotide binding	4.53	49
	Gene ID	Product description			Gene ID	Product description
	GL50803_16286	Lecithin-cholesterol acyl transferase, putative			GL50803_16575	ABC transporter family protein
	GL50803_5746	Lecithin-cholesterol acyl transferase, putative			GL50803_16605	ABC transporter family protein
	GL50803_88581	Synaptic glycoprotein SC2			GL50803_9133	ABC transporter
	GL50803_100845	Hypothetical protein			GL50803_17165	ABC transporter, ATP-binding protein
	GL50803_12116	Hypothetical protein			GL50803_15164	ATP-binding protein
	GL50803_5987	Hypothetical protein			GL50803_92739	ATP-dependent RNA helicase A
	GL50803_8713	Hypothetical protein			GL50803_17387	ATP-dependent RNA helicase DHR1, putative
					GL50803_16887	ATP-dependent RNA helicase HAS1, putative
UP					GL50803_16376	ATP-dependent RNA helicase p47, putative
Cluster	Enrichment Score:	No. genes			GL50803_13220	ATP-dependent RNA helicase
ATP binding	1.52	90			GL50803_13791	ATP-dependent RNA helicase
					GL50803_9119	ATP-dependent RNA helicase
	Gene ID	Product description			GL50803_15048	ATP-dependent RNA helicase-like protein
	GL50803_14109	ATP-binding protein			GL50803_96460	Alanyl-tRNA synthetase
	GL50803_2556	ATP-dependent Clp protease ATP-binding subunit ClpB			GL50803_10521	Arginyl-tRNA synthetase
	GL50803_17438	ATP-dependent DNA helicase recQ			GL50803_17587	CTP synthase
	GL50803_95898	ATP-dependent RNA helicase			GL50803_16453	Carbamate kinase
	GL50803_5358	Aurora kinase			GL50803_34684	DEAD box RNA helicase Vasa
	GL50803_15380	CDC8			GL50803_16975	DNA topoisomerase II
	GL50803_92673	CHL1-like protein			GL50803_35180	GTOR
	GL50803_17520	ClpB protein			GL50803_114246	GTP-binding protein, putative
	GL50803_9145	DNA helicase RecQ			GL50803_9348	Glutaminyl-tRNA synthetase
	GL50803_13104	DNA repair protein RAD51			GL50803_17146	Helicase
	GL50803_15429	Glutathione synthetase, putative			GL50803_16235	Kinase, CAMK CAMKL
	GL50803_17073	Kinase			GL50803_22850	Kinase, CMGC MAPK
	GL50803_6624	Kinase			GL50803_11311	Kinase, NEK
	GL50803_90575	Kinase			GL50803_5375	Kinase, NEK
	GL50803_14364	Kinase, CAMK CAMKL			GL50803_104150	Kinase, PLK
	GL50803_16034	Kinase, CAMK CAMKL			GL50803_16945	Kinesin-13
	GL50803_11290	Kinase, CMGC CDK			GL50803_13797	Kinesin-14
	GL50803_4191	Kinase, CMGC CDK			GL50803_6404	Kinesin-9
	GL50803_27520	Kinase, CMGC CK2			GL50803_16224	Kinesin-related protein
	GL50803_17335	Kinase, CMGC SRPK			GL50803_22204	Methionyl-tRNA synthetase
	GL50803_102542	Kinase, NEK			GL50803_15930	RNA helicase, putative
	GL50803_112518	Kinase, NEK			GL50803_7662	RNase L inhibitor
	GL50803_112553	Kinase, NEK			GL50803_101906	SKD1 protein
	GL50803_11355	Kinase, NEK			GL50803_16830	Spindle pole protein, putative
	GL50803_114495	Kinase, NEK			GL50803_17482	TCP-1 chaperonin subunit alpha
	GL50803_13215	Kinase, NEK			GL50803_91919	TCP-1 chaperonin subunit alpha
	GL50803_137701	Kinase, NEK			GL50803_11397	TCP-1 chaperonin subunit beta
	GL50803_137706	Kinase, NEK			GL50803_11992	TCP-1 chaperonin subunit epsilon
	GL50803_137733	Kinase, NEK			GL50803_16124	TCP-1 chaperonin subunit eta
	GL50803_137735	Kinase, NEK			GL50803_17411	TCP-1 chaperonin subunit gamma
	GL50803_14044	Kinase, NEK			GL50803_13500	TCP-1 chaperonin subunit theta
	GL50803_15064	Kinase, NEK			GL50803_10231	TCP-1 chaperonin subunit zeta
	GL50803_16792	Kinase, NEK			GL50803_8524	Transitional endoplasmic reticulum ATPase
	GL50803_16862	Kinase, NEK			GL50803_10255	Translation initiation factor eIF-4A, putative
	GL50803_17510	Kinase, NEK			GL50803_3978	Ubiquitin-conjugating enzyme E2-17 kDa
	GL50803_17622	Kinase, NEK			GL50803_35428	Valine-tRNA ligase
	GL50803_21924	Kinase, NEK
	GL50803_30354	Kinase, NEK
	GL50803_3449	Kinase, NEK		DOWN
	GL50803_36783	Kinase, NEK		Cluster	Enrichment Score:	No. genes
	GL50803_3957	Kinase, NEK		Protein folding	4.45	10
	GL50803_42657	Kinase, NEK
	GL50803_42698	Kinase, NEK			Gene ID	Product description
	GL50803_4959	Kinase, NEK			GL50803_15398	Chaperone protein dnaJ
	GL50803_6140	Kinase, NEK			GL50803_15460	Dynein-like protein
	GL50803_7103	Kinase, NEK			GL50803_17482	TCP-1 chaperonin subunit alpha
	GL50803_7514	Kinase, NEK			GL50803_91919	TCP-1 chaperonin subunit alpha
	GL50803_87928	Kinase, NEK			GL50803_11397	TCP-1 chaperonin subunit beta
	GL50803_8860	Kinase, NEK			GL50803_11992	TCP-1 chaperonin subunit epsilon
	GL50803_9327	Kinase, NEK			GL50803_16124	TCP-1 chaperonin subunit eta
	GL50803_9354	Kinase, NEK			GL50803_17411	TCP-1 chaperonin subunit gamma
	GL50803_95003	Kinase, NEK			GL50803_13500	TCP-1 chaperonin subunit theta
	GL50803_95549	Kinase, NEK			GL50803_10231	TCP-1 chaperonin subunit zeta
	GL50803_9658	Kinase, NEK
	GL50803_9665	Kinase, NEK
	GL50803_17560	Kinase, Nek-like		DOWN
	GL50803_16986	Kinase, STE STE20		Cluster	Enrichment Score:	No. genes
	GL50803_4371	Kinesin-8		Protein phosporylation	1.81	24
	GL50803_11442	Kinesin-related protein
	GL50803_15344	MCM2			Gene ID	Product description
	GL50803_16214	MCM3			GL50803_5643	Kinase
	GL50803_4964	Mevalonate kinase			GL50803_16235	Kinase, CAMK CAMKL
	GL50803_16149	Mlh1-like protein			GL50803_96363	Kinase, CAMKK
	GL50803_17315	Multidrug resistance ABC transporter ATP-binding and permease protein			GL50803_101866	Kinase, NEK
	GL50803_31530	NH3-dependent NAD+ synthetase			GL50803_114120	Kinase, NEK
	GL50803_13672	Nicotinamide-nucleotide adenylyltransferase			GL50803_13981	Kinase, NEK
	GL50803_92618	Nicotinamide-nucleotide adenylyltransferase			GL50803_14223	Kinase, NEK
	GL50803_10969	Nucleotide-binding protein 1			GL50803_14835	Kinase, NEK
	GL50803_10361	P60 katanin			GL50803_14916	Kinase, NEK
	GL50803_8389	P60 katanin			GL50803_15953	Kinase, NEK
	GL50803_5857	Pantothenate kinase 4			GL50803_16279	Kinase, NEK
	GL50803_16958	Phospholipid-transporting ATPase IA, putative			GL50803_17231	Kinase, NEK
	GL50803_8182	Phospholipid-transporting ATPase IA, putative			GL50803_5346	Kinase, NEK
	GL50803_8961	Protein 21.1			GL50803_5999	Kinase, NEK
	GL50803_14993	Pyrophosphate-fructose 6-phosphate 1-phosphotransferase alpha subunit			GL50803_8445	Kinase, NEK
	GL50803_87022	RNA helicase			GL50803_87945	Kinase, NEK
	GL50803_17497	RNA-dependent helicase p68, putative			GL50803_91220	Kinase, NEK
	GL50803_15469	SKD1 protein			GL50803_92498	Kinase, NEK
	GL50803_137745	SMC3-like protein			GL50803_95593	Kinase, NEK
	GL50803_15279	Spo11 Type II DNA topoisomerase VI subunit A			GL50803_95717	Kinase, NEK
	GL50803_16796	TP53 regulating kinase			GL50803_102034	Kinase, NEK-frag
	GL50803_16143	Transcription regulatory protein SNF2			GL50803_14786	Kinase, NEK-frag
	GL50803_9352	U5 small nuclear ribonucleoprotein 200 kDa helicase, putative			GL50803_91334	Kinase, NEK-frag
	GL50803_24068	UBC3			GL50803_7653	Kinase, NEK-like
	GL50803_3171	UBCE14
	GL50803_114336	hypothetical protein
	GL50803_16050	hypothetical protein
	GL50803_16552	hypothetical protein
	GL50803_7800	hypothetical protein
	GL50803_17308	mRNA capping enzyme alpha subunit

## Sheet: 31.5-Cyst
Up and down regulated clusters 31.5-Cyst
UP					DOWN
Cluster	Enrichment Score:	No. genes			Cluster	Enrichment Score:	No. genes
EGF-like	12.4	102			Translation	4.23	41
	Gene ID	Product description				Gene ID	Product description
	GL50803_17476	CXC-rich protein				GL50803_12055	Elongation factor 2
	GL50803_112633	High cysteine membrane protein EGF-like				GL50803_17570	Elongation factor 2
	GL50803_113213	High cysteine membrane protein EGF-like				GL50803_16111	HSP70 subfamily B suppressor 1
	GL50803_113531	High cysteine membrane protein EGF-like				GL50803_13926	Nucleolar protein family A, member 2
	GL50803_114626	High cysteine membrane protein EGF-like				GL50803_10428	Ribosomal protein L10
	GL50803_137727	High cysteine membrane protein EGF-like				GL50803_1345	Ribosomal protein L10a
	GL50803_16936	High cysteine membrane protein EGF-like				GL50803_5593	Ribosomal protein L11
	GL50803_15317	High cysteine membrane protein Group 1				GL50803_14622	Ribosomal protein L13
	GL50803_16318	High cysteine membrane protein Group 1				GL50803_98056	Ribosomal protein L17
	GL50803_32607	High cysteine membrane protein Group 1				GL50803_16387	Ribosomal protein L18a
	GL50803_14017	High cysteine membrane protein Group 2				GL50803_16431	Ribosomal protein L19
	GL50803_15475	High cysteine membrane protein Group 2				GL50803_10091	Ribosomal protein L23
	GL50803_16374	High cysteine membrane protein Group 2				GL50803_7870	Ribosomal protein L23A
	GL50803_16721	High cysteine membrane protein Group 2				GL50803_14869	Ribosomal protein L24
	GL50803_17328	High cysteine membrane protein Group 2				GL50803_8462	Ribosomal protein L27
	GL50803_22547	High cysteine membrane protein Group 2				GL50803_16310	Ribosomal protein L27a
	GL50803_39904	High cysteine membrane protein Group 2				GL50803_14321	Ribosomal protein L30
	GL50803_91099	High cysteine membrane protein Group 2				GL50803_14049	Ribosomal protein L32
	GL50803_9620	High cysteine membrane protein Group 2				GL50803_6133	Ribosomal protein L35
	GL50803_113987	High cysteine membrane protein Group 3				GL50803_14827	Ribosomal protein S11
	GL50803_27717	High cysteine membrane protein Group 3				GL50803_33862	Ribosomal protein S12
	GL50803_114089	High cysteine membrane protein Group 4				GL50803_7878	Ribosomal protein S14
	GL50803_112432	High cysteine membrane protein Group 5				GL50803_15260	Ribosomal protein S15
	GL50803_137715	High cysteine membrane protein Group 5				GL50803_4652	Ribosomal protein S16
	GL50803_16716	High cysteine membrane protein Group 5				GL50803_15551	Ribosomal protein S18
	GL50803_21321	High cysteine membrane protein Group 5				GL50803_8118	Ribosomal protein S2
	GL50803_113512	High cysteine membrane protein Group 6				GL50803_6022	Ribosomal protein S20
	GL50803_114470	High cysteine membrane protein Group 6				GL50803_10367	Ribosomal protein S24
	GL50803_15250	High cysteine membrane protein Group 6				GL50803_17364	Ribosomal protein S26
	GL50803_113319	High cysteine membrane protein TMK-like				GL50803_3570	Ribosomal protein S28
	GL50803_113416	High cysteine membrane protein TMK-like				GL50803_7999	Ribosomal protein S3
	GL50803_114180	High cysteine membrane protein TMK-like				GL50803_16265	Ribosomal protein S3a
	GL50803_112584	High cysteine membrane protein VSP-like				GL50803_11359	Ribosomal protein S4
	GL50803_114852	High cysteine membrane protein VSP-like				GL50803_12981	Ribosomal protein S5
	GL50803_115066	High cysteine membrane protein VSP-like				GL50803_14620	Ribosomal protein S6
	GL50803_137672	High cysteine membrane protein VSP-like				GL50803_14329	Ribosomal protein S7
	GL50803_40376	High cysteine non-variant cyst protein				GL50803_5845	Ribosomal protein S8
	GL50803_25238	High cysteine protein				GL50803_7766	Ribosomal protein SA
	GL50803_6372	High cysteine protein				GL50803_115239	Translation initiation factor IF-2, putative
	GL50803_94003	High cysteine protein				GL50803_5665	Ubiquitin/ribosomal protein CEP52
	GL50803_16322	Neurogenic locus Notch protein precursor				GL50803_16298	hypothetical protein
	GL50803_24512	Neurogenic locus notch-like protein
	GL50803_6509	Neurogenic locus notch-like protein			DOWN
	GL50803_92495	Neurogenic locus notch-like protein			Cluster	Enrichment Score:	No. genes
	GL50803_16454	Protein kinase, putative			ATP binding	3.6	237
	GL50803_10330	Tenascin precursor
	GL50803_114815	Tenascin precursor				Gene ID	Product description
	GL50803_8687	Tenascin precursor
	GL50803_16477	Tenascin-37				GL50803_21331	26S protease regulatory subunit 7
	GL50803_14360	Tenascin-X				GL50803_113554	26S proteasome ATPase subunit S4, putative
	GL50803_14573	Tenascin-X				GL50803_16575	ABC transporter family protein
	GL50803_16833	Tenascin-like				GL50803_16605	ABC transporter family protein
	GL50803_95162	Tenascin-like				GL50803_17165	ABC transporter, ATP-binding protein
	GL50803_13194	VSP AS8				GL50803_9741	ABC transporter, ATP-binding protein
	GL50803_137604	VSP S8				GL50803_15164	ATP-binding protein
	GL50803_137714	VSP presumed INR				GL50803_92739	ATP-dependent RNA helicase A
	GL50803_112208	VSP with INR				GL50803_17387	ATP-dependent RNA helicase DHR1, putative
	GL50803_113450	VSP with INR				GL50803_16887	ATP-dependent RNA helicase HAS1, putative
	GL50803_113797	VSP with INR				GL50803_16376	ATP-dependent RNA helicase p47, putative
	GL50803_11470	VSP with INR				GL50803_13220	ATP-dependent RNA helicase
	GL50803_115797	VSP with INR				GL50803_13791	ATP-dependent RNA helicase
	GL50803_115831	VSP with INR				GL50803_14098	ATP-dependent RNA helicase
	GL50803_137608	VSP with INR				GL50803_16042	ATP-dependent RNA helicase
	GL50803_14586	VSP with INR				GL50803_17239	ATP-dependent RNA helicase
	GL50803_16501	VSP with INR				GL50803_15048	ATP-dependent RNA helicase-like protein
	GL50803_102662	VSP				GL50803_22138	ATPase, AAA family
	GL50803_103992	VSP				GL50803_28234	Adenylate kinase
	GL50803_111933	VSP				GL50803_4849	Adenylate kinase
	GL50803_111936	VSP				GL50803_90402	Adenylate kinase
	GL50803_112113	VSP				GL50803_96460	Alanyl-tRNA synthetase
	GL50803_112801)	VSP				GL50803_10521	Arginyl-tRNA synthetase
	GL50803_113163	VSP				GL50803_14375	Asparaginyl-tRNA synthetase
	GL50803_113304	VSP				GL50803_10870	Aspartyl-tRNA synthetase
	GL50803_114162	VSP				GL50803_17587	CTP synthase
	GL50803_114813	VSP				GL50803_14581	Chaperone protein DnaK HSP70
	GL50803_115047	VSP				GL50803_103891	Chaperonin 60
	GL50803_115085	VSP				GL50803_112978	Chromodomain helicase-DNA-binding protein, putative
	GL50803_115202	VSP				GL50803_5867	Cysteinyl-tRNA synthetase
	GL50803_11521	VSP				GL50803_34684	DEAD box RNA helicase Vasa
	GL50803_115830	VSP				GL50803_16512	DNA repair helicase TFIIH P90
	GL50803_116477	VSP				GL50803_16975	DNA topoisomerase II
	GL50803_13390	VSP				GL50803_23420	Diphosphomevalonate decarboxylase
	GL50803_137610	VSP				GL50803_13346	Dmc1b
	GL50803_137617	VSP				GL50803_114246	GTP-binding protein, putative
	GL50803_137618	VSP				GL50803_8826	Glucokinase
	GL50803_137707	VSP				GL50803_86681	Glutaminyl-tRNA synthetase
	GL50803_137708	VSP				GL50803_9348	Glutaminyl-tRNA synthetase
	GL50803_137710	VSP				GL50803_9011	Glycyl-tRNA synthetase
	GL50803_137744	VSP				GL50803_17146	Helicase
	GL50803_137752	VSP				GL50803_104173	Isoleucyl-tRNA synthetase
	GL50803_14297	VSP				GL50803_137702	Kinase
	GL50803_15123	VSP				GL50803_14261	Kinase
	GL50803_33279	VSP				GL50803_16587	Kinase
	GL50803_33783	VSP				GL50803_21435	Kinase
	GL50803_34357	VSP				GL50803_5643	Kinase
	GL50803_40571	VSP				GL50803_11364	Kinase, AGC AKT
	GL50803_41472	VSP				GL50803_8587	Kinase, AGC NDR
	GL50803_87628	VSP				GL50803_86444	Kinase, AGC PKA
	GL50803_13728	Variant-specific surface protein				GL50803_11178	Kinase, CAMK CAMK1
	GL50803_113038	hypothetical protein				GL50803_16235	Kinase, CAMK CAMKL
	GL50803_114674	hypothetical protein				GL50803_96363	Kinase, CAMKK
	GL50803_221693	hypothetical protein				GL50803_7537	Kinase, CK1 Casein kinase
						GL50803_11290	Kinase, CMGC CDK
UP						GL50803_92741	Kinase, CMGC CLK
Cluster	Enrichment Score:	No. genes				GL50803_21116	Kinase, CMGC CMGC-GL1
Aminoacid transporter	1.47	9				GL50803_137695	Kinase, CMGC DYRK
						GL50803_17417	Kinase, CMGC DYRK
	Gene ID	Product description				GL50803_17625	Kinase, CMGC GSK
	GL50803_102051	Amino acid transporter family				GL50803_22850	Kinase, CMGC MAPK
	GL50803_16283	Amino acid transporter family				GL50803_14172	Kinase, CMGC RCK
	GL50803_6000	Amino acid transporter family				GL50803_12223	Kinase, NAK
	GL50803_7909	Amino acid transporter family				GL50803_101534	Kinase, NEK
	GL50803_8523	Amino acid transporter family				GL50803_101866	Kinase, NEK
	GL50803_17214	Amino acid transporter system N2, putative				GL50803_10893	Kinase, NEK
	GL50803_95904)	Amino acid transporter system N2, putative				GL50803_113094	Kinase, NEK
	GL50803_11299	Amino acid transporter, putative				GL50803_11311	Kinase, NEK
	GL50803_91295	hypothetical protein				GL50803_113553	Kinase, NEK
						GL50803_11390	Kinase, NEK
						GL50803_114120	Kinase, NEK
						GL50803_114192	Kinase, NEK
						GL50803_119989	Kinase, NEK
						GL50803_12148	Kinase, NEK
						GL50803_12152	Kinase, NEK
						GL50803_12240	Kinase, NEK
						GL50803_13215	Kinase, NEK
						GL50803_137696	Kinase, NEK
						GL50803_13981	Kinase, NEK
						GL50803_14216	Kinase, NEK
						GL50803_14223	Kinase, NEK
						GL50803_14742	Kinase, NEK
						GL50803_14835	Kinase, NEK
						GL50803_14897	Kinase, NEK
						GL50803_14916	Kinase, NEK
						GL50803_14934	Kinase, NEK
						GL50803_15049	Kinase, NEK
						GL50803_15479	Kinase, NEK
						GL50803_15953	Kinase, NEK
						GL50803_16122	Kinase, NEK
						GL50803_16205	Kinase, NEK
						GL50803_16272	Kinase, NEK
						GL50803_16279	Kinase, NEK
						GL50803_16765	Kinase, NEK
						GL50803_16824	Kinase, NEK
						GL50803_16943	Kinase, NEK
						GL50803_16952	Kinase, NEK
						GL50803_16967	Kinase, NEK
						GL50803_17069	Kinase, NEK
						GL50803_17188	Kinase, NEK
						GL50803_17216	Kinase, NEK
						GL50803_17231	Kinase, NEK
						GL50803_17318	Kinase, NEK
						GL50803_17622	Kinase, NEK
						GL50803_21366	Kinase, NEK
						GL50803_24321	Kinase, NEK
						GL50803_2483	Kinase, NEK
						GL50803_26199	Kinase, NEK
						GL50803_27124	Kinase, NEK
						GL50803_3546	Kinase, NEK
						GL50803_3677	Kinase, NEK
						GL50803_4912	Kinase, NEK
						GL50803_5346	Kinase, NEK
						GL50803_5375	Kinase, NEK
						GL50803_5553	Kinase, NEK
						GL50803_5999	Kinase, NEK
						GL50803_6680	Kinase, NEK
						GL50803_8445	Kinase, NEK
						GL50803_8556	Kinase, NEK
						GL50803_87945	Kinase, NEK
						GL50803_8856	Kinase, NEK
						GL50803_91220	Kinase, NEK
						GL50803_92498	Kinase, NEK
						GL50803_9289	Kinase, NEK
						GL50803_95593	Kinase, NEK
						GL50803_95717	Kinase, NEK
						GL50803_97130	Kinase, NEK
						GL50803_102034	Kinase, NEK
						GL50803_12095	Kinase, NEK-frag
						GL50803_13479	Kinase, NEK-frag
						GL50803_13963	Kinase, NEK-frag
						GL50803_14786	Kinase, NEK-frag
						GL50803_15338	Kinase, NEK-frag
						(GL50803_15411	Kinase, NEK-frag
						GL50803_16733	Kinase, NEK-frag
						GL50803_16839	Kinase, NEK-frag
						GL50803_4977	Kinase, NEK-frag
						GL50803_5489	Kinase, NEK-frag
						GL50803_91334	Kinase, NEK-frag
						GL50803_15035	Kinase, NEK-like
						GL50803_17299	Kinase, NEK-like
						GL50803_4322	Kinase, NEK-like
						GL50803_7653	Kinase, NEK-like
						GL50803_96878	Kinase, NEK-like
						GL50803_6346	Kinase, NEK-like
						GL50803_104150	Kinase, PLK
						GL50803_1656	Kinase, STE STE11
						GL50803_10609	Kinase, STE STE20
						GL50803_15514	Kinase, STE STE21
						GL50803_22165	Kinase, STE STE22
						GL50803_2796	Kinase, STE STE23
						GL50803_4405	Kinase, TTK
						GL50803_17368	Kinase, ULK
						GL50803_90343	Kinase, Wnk
						GL50803_17264	Kinesin like protein
						GL50803_16945	Kinesin-13
						GL50803_13797	Kinesin-14
						GL50803_16456	Kinesin-2
						GL50803_6262	Kinesin-3
						GL50803_102455	Kinesin-6
						GL50803_10137	Kinesin-9
						GL50803_6404	Kinesin-9
						GL50803_14070	Kinesin-like protein
						GL50803_16224	Kinesin-related protein
						GL50803_8621	Leucyl-tRNA synthetase
						GL50803_14004	Long-flagella protein, kinase, CMGC RCK
						GL50803_16766	Lysyl-tRNA synthetase
						GL50803_16214	MCM3
						GL50803_89112	MCM5
						GL50803_17390	MCM6
						GL50803_10765	MCM7
						GL50803_15078	Metal-dependent hydrolase related to alanyl-tRNA synthetase
						GL50803_22204	Methionyl-tRNA synthetase
						GL50803_4964	Mevalonate kinase
						GL50803_34058	Mismatch repair protein
						GL50803_113252	Msh2-like protein
						GL50803_14277	N-acetyltransferase-like protein
						GL50803_31530	NH3-dependent NAD+ synthetase
						GL50803_112681	NSF
						GL50803_114776	NSF
						GL50803_10969	Nucleotide-binding protein 1
						GL50803_12162	Phenylalanyl-tRNA synthetase alpha chain
						GL50803_16760	Phenylalanyl-tRNA synthetase beta chain
						GL50803_90872	Phosphoglycerate kinase
						GL50803_137725	Phospholipid-transporting ATPase IIB, putative
						GL50803_15983	Prolyl-tRNA synthetase
						GL50803_14681	Protein 21.1
						GL50803_13200	RNA helicase, putative
						GL50803_15930	RNA helicase, putative
						(GL50803_6616	RNA helicase, putative
						GL50803_7662	RNase L inhibitor
						GL50803_13452	Regulator of nonsense transcripts 1-like protein
						GL50803_9287	Replication factor C, sub 2
						GL50803_15392	Replication factor C, subunit 1
						GL50803_24636	Replication factor C, subunit 3
						GL50803_14095	Replication factor C, subunit 4
						GL50803_15297	Ribokinase
						GL50803_5659	S-adenosylmethionine synthetase
						GL50803_101906	SKD1 protein
						GL50803_15469	SKD1 protein
						GL50803_5811	Serine/threonine protein kinase
						GL50803_101501	Seryl-tRNA synthetase
						GL50803_9266	Sgs1 DNA helicase, putative
						GL50803_94322	Spastin
						GL50803_16830	Spindle pole protein, putative
						GL50803_4255	Sugar kinase, putative
						GL50803_9825	TBP-interacting protein TIP49
						GL50803_17482	TCP-1 chaperonin subunit alpha
						GL50803_91919	TCP-1 chaperonin subunit alpha
						GL50803_11397	TCP-1 chaperonin subunit beta
						GL50803_11992	TCP-1 chaperonin subunit epsilon
						GL50803_16124	TCP-1 chaperonin subunit eta
						GL50803_17411	TCP-1 chaperonin subunit gamma
						GL50803_13500	TCP-1 chaperonin subunit theta
						GL50803_10231	TCP-1 chaperonin subunit zeta
						GL50803_4328	TFIIH basal transcription factor complex helicase subunit
						GL50803_8364	Thymidine kinase
						GL50803_16370	Transcriptional activator, putative
						GL50803_42442	Transitional endoplasmic reticulum ATPase
						GL50803_8524	Transitional endoplasmic reticulum ATPase
						GL50803_10255	Translation initiation factor eIF-4A, putative
						GL50803_8456	Tubulin tyrosine ligase
						GL50803_16612	Tyrosyl-tRNA synthetase
						GL50803_2876	UBC2, putative
						GL50803_12950	Ubiquitin-conjugating enzyme E2-17 kDa
						GL50803_3978	Ubiquitin-conjugating enzyme E2-17 kDa
						GL50803_16549	Uridine kinase
						GL50803_8217	Uridine kinase
						GL50803_7532	Vacuolar ATP synthase catalytic subunit A
						GL50803_12216	Vacuolar ATP synthase subunit B
						GL50803_35428	Valine-tRNA ligase
						GL50803_16065	hypothetical protein
						GL50803_16518	hypothetical protein
						GL50803_17089	hypothetical protein
						GL50803_17527	hypothetical protein
						GL50803_6283	hypothetical protein
						GL50803_95787	hypothetical protein
					DOWN
					Cluster	Enrichment Score:	No. genes
					Protein biosynthesis	1.83	23
						Gene ID	Product description
						GL50803_96460	Alanyl-tRNA synthetase
						GL50803_10521	Arginyl-tRNA synthetase
						GL50803_12102	Elongation factor 1-gamma
						GL50803_12055	Elongation factor 2
						GL50803_17570	Elongation factor 2
						GL50803_13943	Eukaryotic translation initiation factor 2 alpha subunit
						GL50803_91398	Eukaryotic translation initiation factor 2 beta subunit
						GL50803_14614	Eukaryotic translation initiation factor 5A
						GL50803_86681	Glutaminyl-tRNA synthetase
						GL50803_9348	Glutaminyl-tRNA synthetase
						GL50803_104173	Isoleucyl-tRNA synthetase
						GL50803_8621	Leucyl-tRNA synthetase
						GL50803_22204	Methionyl-tRNA synthetase
						GL50803_13561	Translation elongation factor
						GL50803_2970	Translation initiation factor 2 gamma subunit
						GL50803_14606	Translation initiation factor 6
						GL50803_115239	Translation initiation factor IF-2, putative
						GL50803_4838	Translation initiation factor eIF-2B delta subunit
						GL50803_10255	Translation initiation factor eIF-4A, putative
						GL50803_1657	Translation initiation factor
						GL50803_7652	Translation initiation factor
						GL50803_16612	Tyrosyl-tRNA synthetase
						GL50803_35428	Valine-tRNA ligase
