# Supplementary material for: A Detailed Gene Expression Map of Giardia Encystation
Source: Genes (Basel). 2021 Nov 30;12(12):1932. doi: 10.3390/genes12121932 (PMC8700996; doi:10.3390/genes12121932)
Supplement: Supplementary file 1 [file genes-12-01932-s001.zip › Table S3 Rev1 - Myb2 regulon.xlsx]

## Sheet: Table S3 legend
Legend for Table S3
A. Unchanged controls: 149 genes whose transcript-levels were found to be unchanged throughout encystation. The upstream regions (geneStart-200 to geneCodeStart+0) of this set of genes were used as negative control to scan for enriched-motifs using the MEME suite of tools.
B. Myb2 sites in orthologs: G. intestinalis WB genes up-regulated at 7, 10.5 and 14 hours p.i. stratified by the presence or absense (no motif in WB) of a canonical Myb2 motif (CWACAG) in the promotor-region (geneStart-200 to geneCodeStart+0). The corresponding orthologs from G. intestinalis P15, G. intestinalis GS, G. muris RT as indicated in GiardiaDB are marked green if their upstream-region h…

## Sheet: A. Unchanged controls
GL50803_4313 | Giardia Assemblage A isolate WB | VSP | genomic | GLCHR05 reverse | (geneStart-200 to geneCodeStart+0)| length=201
GL50803_103373 | Giardia Assemblage A isolate WB | Alpha-7.1 giardin | genomic | GLCHR05 reverse | (geneStart-200 to geneCodeStart+0)| length=201
GL50803_8433 | Giardia Assemblage A isolate WB | hypothetical protein | genomic | GLCHR05 reverse | (geneStart-200 to geneCodeStart+0)| length=201
GL50803_15478 | Giardia Assemblage A isolate WB | hypothetical protein | genomic | GLCHR05 reverse | (geneStart-200 to geneCodeStart+0)| length=201
GL50803_2007 | Giardia Assemblage A isolate WB | hypothetical protein | genomic | GLCHR05 reverse | (geneStart-200 to geneCodeStart+0)| length=201
GL50803_114535 | Giardia Assemblage A isolate WB | Kinase, NEK | genomic | GLCHR05 reverse | (geneStart-200 to geneCodeStart+0)| length=201
GL50803_14872 | Giardia Assemblage A isolate WB | Protein 21.1 | genomic | GLCHR05 forward | (geneStart-200 to geneCodeStart+0)| length=201
GL50803_17119 | Giardia Assemblage A isolate WB | hypothetical protein | genomic | GLCHR05 reverse | (geneStart-200 to geneCodeStart+0)| length=201
GL50803_113876 | Giardia Assemblage A isolate WB | ABC transporter, ATP-binding protein, putative | genomic | GLCHR05 reverse | (geneStart-200 to geneCodeStart+0)| length=201
GL50803_6920 | Giardia Assemblage A isolate WB | hypothetical protein | genomic | GLCHR05 reverse | (geneStart-200 to geneCodeStart+0)| length=201
GL50803_117163 | Giardia Assemblage A isolate WB | hypothetical protein | genomic | AACB02000029_frag reverse | (geneStart-200 to geneCodeStart+0)| length=201
GL50803_4365 | Giardia Assemblage A isolate WB | 26S protease regulatory subunit 6A | genomic | GLCHR05 reverse | (geneStart-200 to geneCodeStart+0)| length=201
GL50803_17063 | Giardia Assemblage A isolate WB | Pyruvate-flavodoxin oxidoreductase | genomic | GLCHR05 reverse | (geneStart-200 to geneCodeStart+0)| length=201
GL50803_117440 | Giardia Assemblage A isolate WB | Variant-specific surface protein | genomic | GLCHR05 forward | (geneStart-200 to geneCodeStart+0)| length=201
GL50803_7588 | Giardia Assemblage A isolate WB | Serine/threonine protein phosphatase 7 | genomic | GLCHR05 forward | (geneStart-200 to geneCodeStart+0)| length=201
GL50803_13427 | Giardia Assemblage A isolate WB | Protein 21.1 | genomic | GLCHR05 forward | (geneStart-200 to geneCodeStart+0)| length=201
GL50803_114497 | Giardia Assemblage A isolate WB | hypothetical protein | genomic | GLCHR05 forward | (geneStart-200 to geneCodeStart+0)| length=201
GL50803_116574 | Giardia Assemblage A isolate WB | hypothetical protein | genomic | GLCHR05 forward | (geneStart-200 to geneCodeStart+0)| length=201
GL50803_21133 | Giardia Assemblage A isolate WB | hypothetical protein | genomic | GLCHR05 forward | (geneStart-200 to geneCodeStart+0)| length=201
GL50803_114121 | Giardia Assemblage A isolate WB | VSP | genomic | GLCHR05 reverse | (geneStart-200 to geneCodeStart+0)| length=201
GL50803_134442 | Giardia Assemblage A isolate WB | hypothetical protein | genomic | GLCHR05 reverse | (geneStart-200 to geneCodeStart+0)| length=201
GL50803_2863 | Giardia Assemblage A isolate WB | hypothetical protein | genomic | GLCHR05 reverse | (geneStart-200 to geneCodeStart+0)| length=201
GL50803_17283 | Giardia Assemblage A isolate WB | hypothetical protein | genomic | GLCHR05 reverse | (geneStart-200 to geneCodeStart+0)| length=201
GL50803_101739 | Giardia Assemblage A isolate WB | hypothetical protein | genomic | GLCHR05 reverse | (geneStart-200 to geneCodeStart+0)| length=201
GL50803_137723 | Giardia Assemblage A isolate WB | VSP | genomic | GLCHR05 forward | (geneStart-200 to geneCodeStart+0)| length=201
GL50803_16577 | Giardia Assemblage A isolate WB | hypothetical protein | genomic | GLCHR05 reverse | (geneStart-200 to geneCodeStart+0)| length=201
GL50803_16980 | Giardia Assemblage A isolate WB | hypothetical protein | genomic | GLCHR05 reverse | (geneStart-200 to geneCodeStart+0)| length=201
GL50803_8449 | Giardia Assemblage A isolate WB | hypothetical protein | genomic | GLCHR05 forward | (geneStart-200 to geneCodeStart+0)| length=201
GL50803_2452 | Giardia Assemblage A isolate WB | Ornithine cyclodeaminase | genomic | GLCHR05 reverse | (geneStart-200 to geneCodeStart+0)| length=201
GL50803_11105 | Giardia Assemblage A isolate WB | hypothetical protein | genomic | GLCHR05 forward | (geneStart-200 to geneCodeStart+0)| length=201
GL50803_15110 | Giardia Assemblage A isolate WB | hypothetical protein | genomic | GLCHR05 reverse | (geneStart-200 to geneCodeStart+0)| length=201
GL50803_8914 | Giardia Assemblage A isolate WB | Kinase, NEK | genomic | GLCHR05 forward | (geneStart-200 to geneCodeStart+0)| length=201
GL50803_24400 | Giardia Assemblage A isolate WB | Kinase, NEK | genomic | GLCHR05 forward | (geneStart-200 to geneCodeStart+0)| length=201
GL50803_115571 | Giardia Assemblage A isolate WB | hypothetical protein | genomic | GLCHR05 reverse | (geneStart-200 to geneCodeStart+0)| length=201
GL50803_14456 | Giardia Assemblage A isolate WB | Low molecular weight protein-tyrosine-phosphatase | genomic | GLCHR05 reverse | (geneStart-200 to geneCodeStart+0)| length=201
GL50803_102874 | Giardia Assemblage A isolate WB | hypothetical protein | genomic | GLCHR05 forward | (geneStart-200 to geneCodeStart+0)| length=201
GL50803_11692 | Giardia Assemblage A isolate WB | VSP, putative | genomic | GLCHR05 forward | (geneStart-200 to geneCodeStart+0)| length=201
GL50803_6490 | Giardia Assemblage A isolate WB | Protein 21.1 | genomic | GLCHR05 forward | (geneStart-200 to geneCodeStart+0)| length=201
GL50803_3713 | Giardia Assemblage A isolate WB | hypothetical protein | genomic | GLCHR05 forward | (geneStart-200 to geneCodeStart+0)| length=201
GL50803_16114 | Giardia Assemblage A isolate WB | Ribosomal protein L36-1 | genomic | GLCHR05 forward | (geneStart-200 to geneCodeStart+0)| length=201
GL50803_16267 | Giardia Assemblage A isolate WB | hypothetical protein | genomic | GLCHR05 forward | (geneStart-200 to geneCodeStart+0)| length=201
GL50803_7890 | Giardia Assemblage A isolate WB | Transcriptional regulator ATRX, putative | genomic | GLCHR05 forward | (geneStart-200 to geneCodeStart+0)| length=201
GL50803_103946 | Giardia Assemblage A isolate WB | hypothetical protein | genomic | GLCHR05 reverse | (geneStart-200 to geneCodeStart+0)| length=201
GL50803_113219 | Giardia Assemblage A isolate WB | Hypothetical protein | genomic | GLCHR05 forward | (geneStart-200 to geneCodeStart+0)| length=201
GL50803_11191 | Giardia Assemblage A isolate WB | hypothetical protein | genomic | GLCHR05 forward | (geneStart-200 to geneCodeStart+0)| length=201
GL50803_13525 | Giardia Assemblage A isolate WB | RNA methylase, putative | genomic | GLCHR05 reverse | (geneStart-200 to geneCodeStart+0)| length=201
GL50803_113836 | Giardia Assemblage A isolate WB | High cysteine membrane protein EGF-like | genomic | GLCHR05 reverse | (geneStart-200 to geneCodeStart+0)| length=201
GL50803_34126 | Giardia Assemblage A isolate WB | hypothetical protein | genomic | GLCHR05 reverse | (geneStart-200 to geneCodeStart+0)| length=201
GL50803_8075 | Giardia Assemblage A isolate WB | hypothetical protein | genomic | GLCHR05 reverse | (geneStart-200 to geneCodeStart+0)| length=201
GL50803_3345 | Giardia Assemblage A isolate WB | hypothetical protein | genomic | GLCHR05 reverse | (geneStart-200 to geneCodeStart+0)| length=201
GL50803_15868 | Giardia Assemblage A isolate WB | Mitogen-activated protein kinase kinase kinase 1 | genomic | GLCHR05 reverse | (geneStart-200 to geneCodeStart+0)| length=201
GL50803_93103 | Giardia Assemblage A isolate WB | TRMT2A-like protein | genomic | GLCHR05 forward | (geneStart-200 to geneCodeStart+0)| length=201
GL50803_14649 | Giardia Assemblage A isolate WB | hypothetical protein | genomic | GLCHR05 forward | (geneStart-200 to geneCodeStart+0)| length=201
GL50803_32686 | Giardia Assemblage A isolate WB | hypothetical protein | genomic | GLCHR05 reverse | (geneStart-200 to geneCodeStart+0)| length=201
GL50803_33721 | Giardia Assemblage A isolate WB | hypothetical protein | genomic | GLCHR05 forward | (geneStart-200 to geneCodeStart+0)| length=201
GL50803_9659 | Giardia Assemblage A isolate WB | hypothetical protein | genomic | AACB02000072 reverse | (geneStart-200 to geneCodeStart+0)| length=201
GL50803_113284 | Giardia Assemblage A isolate WB | hypothetical protein | genomic | GLCHR05 forward | (geneStart-200 to geneCodeStart+0)| length=201
GL50803_17280 | Giardia Assemblage A isolate WB | hypothetical protein | genomic | GLCHR05 forward | (geneStart-200 to geneCodeStart+0)| length=201
GL50803_10661 | Giardia Assemblage A isolate WB | Ubiquitin-conjugating enzyme E1 | genomic | GLCHR05 reverse | (geneStart-200 to geneCodeStart+0)| length=201
GL50803_9196 | Giardia Assemblage A isolate WB | Kinase, NEK | genomic | GLCHR05 reverse | (geneStart-200 to geneCodeStart+0)| length=201
GL50803_39483 | Giardia Assemblage A isolate WB | Ribosomal protein S29A | genomic | GLCHR05 forward | (geneStart-200 to geneCodeStart+0)| length=201
GL50803_26838 | Giardia Assemblage A isolate WB | hypothetical protein | genomic | GLCHR05 reverse | (geneStart-200 to geneCodeStart+0)| length=201
GL50803_7896 | Giardia Assemblage A isolate WB | 26S proteasome non-ATPase regulatory subunit 7 | genomic | GLCHR05 reverse | (geneStart-200 to geneCodeStart+0)| length=201
GL50803_16194 | Giardia Assemblage A isolate WB | hypothetical protein | genomic | GLCHR05 reverse | (geneStart-200 to geneCodeStart+0)| length=201
GL50803_5517 | Giardia Assemblage A isolate WB | Ribosomal protein L37a | genomic | GLCHR05 forward | (geneStart-200 to geneCodeStart+0)| length=201
GL50803_102056 | Giardia Assemblage A isolate WB | hypothetical protein | genomic | GLCHR05 reverse | (geneStart-200 to geneCodeStart+0)| length=201
GL50803_33978 | Giardia Assemblage A isolate WB | hypothetical protein | genomic | GLCHR05 reverse | (geneStart-200 to geneCodeStart+0)| length=201
GL50803_116713 | Giardia Assemblage A isolate WB | hypothetical protein | genomic | GLCHR05 reverse | (geneStart-200 to geneCodeStart+0)| length=201
GL50803_16992 | Giardia Assemblage A isolate WB | hypothetical protein | genomic | GLCHR05 reverse | (geneStart-200 to geneCodeStart+0)| length=201
GL50803_4465 | Giardia Assemblage A isolate WB | hypothetical protein | genomic | GLCHR05 reverse | (geneStart-200 to geneCodeStart+0)| length=201
GL50803_8174 | Giardia Assemblage A isolate WB | Protein 21.1 | genomic | GLCHR05 reverse | (geneStart-200 to geneCodeStart+0)| length=201
GL50803_940 | Giardia Assemblage A isolate WB | RabD | genomic | GLCHR05 forward | (geneStart-200 to geneCodeStart+0)| length=201
GL50803_7706 | Giardia Assemblage A isolate WB | hypothetical protein | genomic | GLCHR05 reverse | (geneStart-200 to geneCodeStart+0)| length=201
GL50803_87706 | Giardia Assemblage A isolate WB | High cysteine protein | genomic | GLCHR05 forward | (geneStart-200 to geneCodeStart+0)| length=201
GL50803_21505 | Giardia Assemblage A isolate WB | Protein 21.1 | genomic | GLCHR05 reverse | (geneStart-200 to geneCodeStart+0)| length=201
GL50803_16981 | Giardia Assemblage A isolate WB | hypothetical protein | genomic | GLCHR05 reverse | (geneStart-200 to geneCodeStart+0)| length=201
GL50803_16049 | Giardia Assemblage A isolate WB | Kinase, NEK | genomic | GLCHR05 reverse | (geneStart-200 to geneCodeStart+0)| length=201
GL50803_6919 | Giardia Assemblage A isolate WB | hypothetical protein | genomic | GLCHR05 forward | (geneStart-200 to geneCodeStart+0)| length=201
GL50803_14460 | Giardia Assemblage A isolate WB | Ubiquitin carboxyl-terminal hydrolase 4 | genomic | GLCHR05 reverse | (geneStart-200 to geneCodeStart+0)| length=201
GL50803_17105 | Giardia Assemblage A isolate WB | IFT complex B | genomic | GLCHR05 forward | (geneStart-200 to geneCodeStart+0)| length=201
GL50803_114242 | Giardia Assemblage A isolate WB | hypothetical protein | genomic | GLCHR05 forward | (geneStart-200 to geneCodeStart+0)| length=201
GL50803_137716 | Giardia Assemblage A isolate WB | Axoneme-associated protein GASP-180 | genomic | GLCHR05 reverse | (geneStart-200 to geneCodeStart+0)| length=201
GL50803_21198 | Giardia Assemblage A isolate WB | hypothetical protein | genomic | GLCHR05 forward | (geneStart-200 to geneCodeStart+0)| length=201
GL50803_8253 | Giardia Assemblage A isolate WB | hypothetical protein | genomic | GLCHR05 reverse | (geneStart-200 to geneCodeStart+0)| length=201
GL50803_7427 | Giardia Assemblage A isolate WB | Hypothetical protein | genomic | AACB02000076 forward | (geneStart-200 to geneCodeStart+0)| length=201
GL50803_9194 | Giardia Assemblage A isolate WB | MCM4 | genomic | GLCHR05 reverse | (geneStart-200 to geneCodeStart+0)| length=201
GL50803_10034 | Giardia Assemblage A isolate WB | hypothetical protein | genomic | GLCHR05 forward | (geneStart-200 to geneCodeStart+0)| length=201
GL50803_16746 | Giardia Assemblage A isolate WB | hypothetical protein | genomic | GLCHR05 reverse | (geneStart-200 to geneCodeStart+0)| length=201
GL50803_114445 | Giardia Assemblage A isolate WB | hypothetical protein | genomic | GLCHR05 forward | (geneStart-200 to geneCodeStart+0)| length=201
GL50803_137711 | Giardia Assemblage A isolate WB | hypothetical protein | genomic | GLCHR05 reverse | (geneStart-200 to geneCodeStart+0)| length=201
GL50803_112695 | Giardia Assemblage A isolate WB | hypothetical protein | genomic | GLCHR05 forward | (geneStart-200 to geneCodeStart+0)| length=201
GL50803_24471 | Giardia Assemblage A isolate WB | hypothetical protein | genomic | GLCHR05 forward | (geneStart-200 to geneCodeStart+0)| length=201
GL50803_8432 | Giardia Assemblage A isolate WB | APC11, cyclin metabolism | genomic | GLCHR05 reverse | (geneStart-200 to geneCodeStart+0)| length=201
GL50803_16125 | Giardia Assemblage A isolate WB | Glycerol-3-phosphate dehydrogenase | genomic | GLCHR05 reverse | (geneStart-200 to geneCodeStart+0)| length=201
GL50803_17023 | Giardia Assemblage A isolate WB | Protein 21.1 | genomic | GLCHR05 reverse | (geneStart-200 to geneCodeStart+0)| length=201
GL50803_5522 | Giardia Assemblage A isolate WB | hypothetical protein | genomic | GLCHR05 reverse | (geneStart-200 to geneCodeStart+0)| length=201
GL50803_13495 | Giardia Assemblage A isolate WB | hypothetical protein | genomic | GLCHR05 reverse | (geneStart-200 to geneCodeStart+0)| length=201
GL50803_114119 | Giardia Assemblage A isolate WB | Alpha-7.2 giardin | genomic | GLCHR05 forward | (geneStart-200 to geneCodeStart+0)| length=201
GL50803_96537 | Giardia Assemblage A isolate WB | ATP-dependent RNA helicase | genomic | GLCHR05 reverse | (geneStart-200 to geneCodeStart+0)| length=201
GL50803_103810 | Giardia Assemblage A isolate WB | Protein 21.1 | genomic | GLCHR05 reverse | (geneStart-200 to geneCodeStart+0)| length=201
GL50803_8426 | Giardia Assemblage A isolate WB | hypothetical protein | genomic | GLCHR05 reverse | (geneStart-200 to geneCodeStart+0)| length=201
GL50803_5649 | Giardia Assemblage A isolate WB | Alpha-10 giardin | genomic | GLCHR05 reverse | (geneStart-200 to geneCodeStart+0)| length=201
GL50803_6687 | Giardia Assemblage A isolate WB | Glyceraldehyde 3-phosphate dehydrogenase | genomic | GLCHR05 reverse | (geneStart-200 to geneCodeStart+0)| length=201
GL50803_115572 | Giardia Assemblage A isolate WB | Kinase, Wee | genomic | GLCHR05 forward | (geneStart-200 to geneCodeStart+0)| length=201
GL50803_112207 | Giardia Assemblage A isolate WB | VSP | genomic | GLCHR05 reverse | (geneStart-200 to geneCodeStart+0)| length=201
GL50803_9810 | Giardia Assemblage A isolate WB | Ribosomal protein L44 | genomic | GLCHR05 reverse | (geneStart-200 to geneCodeStart+0)| length=201
GL50803_4007 | Giardia Assemblage A isolate WB | hypothetical protein | genomic | GLCHR05 reverse | (geneStart-200 to geneCodeStart+0)| length=201
GL50803_13464 | Giardia Assemblage A isolate WB | Splicesome-associated protein | genomic | GLCHR05 reverse | (geneStart-200 to geneCodeStart+0)| length=201
GL50803_16311 | Giardia Assemblage A isolate WB | Centromere/microtubule binding protein CBF5 | genomic | GLCHR05 forward | (geneStart-200 to geneCodeStart+0)| length=201
GL50803_9115 | Giardia Assemblage A isolate WB | Glucose-6-phosphate isomerase | genomic | GLCHR05 reverse | (geneStart-200 to geneCodeStart+0)| length=201
GL50803_113871 | Giardia Assemblage A isolate WB | hypothetical protein | genomic | GLCHR05 forward | (geneStart-200 to geneCodeStart+0)| length=201
GL50803_134441 | Giardia Assemblage A isolate WB | hypothetical protein | genomic | GLCHR05 forward | (geneStart-200 to geneCodeStart+0)| length=201
GL50803_17529 | Giardia Assemblage A isolate WB | hypothetical protein | genomic | GLCHR05 reverse | (geneStart-200 to geneCodeStart+0)| length=201
GL50803_8146 | Giardia Assemblage A isolate WB | Basal body protein | genomic | GLCHR05 reverse | (geneStart-200 to geneCodeStart+0)| length=201
GL50803_25809 | Giardia Assemblage A isolate WB | hypothetical protein | genomic | GLCHR05 reverse | (geneStart-200 to geneCodeStart+0)| length=201
GL50803_111950 | Giardia Assemblage A isolate WB | Dynein heavy chain | genomic | GLCHR05 reverse | (geneStart-200 to geneCodeStart+0)| length=201
GL50803_14278 | Giardia Assemblage A isolate WB | hypothetical protein | genomic | GLCHR05 reverse | (geneStart-200 to geneCodeStart+0)| length=201
GL50803_113864 | Giardia Assemblage A isolate WB | hypothetical protein | genomic | GLCHR05 reverse | (geneStart-200 to geneCodeStart+0)| length=201
GL50803_114891 | Giardia Assemblage A isolate WB | High cysteine membrane protein Group 3 | genomic | GLCHR05 forward | (geneStart-200 to geneCodeStart+0)| length=201
GL50803_119672 | Giardia Assemblage A isolate WB | hypothetical protein | genomic | GLCHR05 reverse | (geneStart-200 to geneCodeStart+0)| length=201
GL50803_40369 | Giardia Assemblage A isolate WB | hypothetical protein | genomic | GLCHR05 reverse | (geneStart-200 to geneCodeStart+0)| length=201
GL50803_114161 | Giardia Assemblage A isolate WB | High cysteine protein | genomic | GLCHR05 forward | (geneStart-200 to geneCodeStart+0)| length=201
GL50803_9294 | Giardia Assemblage A isolate WB | hypothetical protein | genomic | GLCHR05 reverse | (geneStart-200 to geneCodeStart+0)| length=201
GL50803_13239 | Giardia Assemblage A isolate WB | hypothetical protein | genomic | GLCHR05 forward | (geneStart-200 to geneCodeStart+0)| length=201
GL50803_8025 | Giardia Assemblage A isolate WB | Nuclear ATP/GTP-binding protein | genomic | GLCHR05 forward | (geneStart-200 to geneCodeStart+0)| length=201
GL50803_6422 | Giardia Assemblage A isolate WB | hypothetical protein | genomic | GLCHR05 forward | (geneStart-200 to geneCodeStart+0)| length=201
GL50803_3154 | Giardia Assemblage A isolate WB | hypothetical protein | genomic | GLCHR05 reverse | (geneStart-200 to geneCodeStart+0)| length=201
GL50803_40783 | Giardia Assemblage A isolate WB | hypothetical protein | genomic | GLCHR05 forward | (geneStart-200 to geneCodeStart+0)| length=201
GL50803_33809 | Giardia Assemblage A isolate WB | hypothetical protein | genomic | GLCHR05 forward | (geneStart-200 to geneCodeStart+0)| length=201
GL50803_91712 | Giardia Assemblage A isolate WB | Amino acid transporter family | genomic | GLCHR05 reverse | (geneStart-200 to geneCodeStart+0)| length=201
GL50803_28057 | Giardia Assemblage A isolate WB | High cysteine protein | genomic | GLCHR05 forward | (geneStart-200 to geneCodeStart+0)| length=201
GL50803_14651 | Giardia Assemblage A isolate WB | Glucosamine 6-phosphate N-acetyltransferase | genomic | GLCHR05 reverse | (geneStart-200 to geneCodeStart+0)| length=201
GL50803_116712 | Giardia Assemblage A isolate WB | hypothetical protein | genomic | GLCHR05 forward | (geneStart-200 to geneCodeStart+0)| length=201
GL50803_137712 | Giardia Assemblage A isolate WB | hypothetical protein | genomic | GLCHR05 reverse | (geneStart-200 to geneCodeStart+0)| length=201
GL50803_8152 | Giardia Assemblage A isolate WB | Kinase, NEK | genomic | GLCHR05 forward | (geneStart-200 to geneCodeStart+0)| length=201
GL50803_37093 | Giardia Assemblage A isolate WB | VSP | genomic | GLCHR05 reverse | (geneStart-200 to geneCodeStart+0)| length=201
GL50803_9807 | Giardia Assemblage A isolate WB | hypothetical protein | genomic | GLCHR05 forward | (geneStart-200 to geneCodeStart+0)| length=201
GL50803_6483 | Giardia Assemblage A isolate WB | Ribonuclease HI, large sub | genomic | GLCHR05 reverse | (geneStart-200 to geneCodeStart+0)| length=201
GL50803_14704 | Giardia Assemblage A isolate WB | hypothetical protein | genomic | GLCHR05 reverse | (geneStart-200 to geneCodeStart+0)| length=201
GL50803_2261 | Giardia Assemblage A isolate WB | Ser/Thr protein phosphatase 2A, 72/130 kDa reg sub B | genomic | GLCHR05 forward | (geneStart-200 to geneCodeStart+0)| length=201
GL50803_13103 | Giardia Assemblage A isolate WB | hypothetical protein | genomic | GLCHR05 reverse | (geneStart-200 to geneCodeStart+0)| length=201
GL50803_22338 | Giardia Assemblage A isolate WB | hypothetical protein | genomic | GLCHR05 forward | (geneStart-200 to geneCodeStart+0)| length=201
GL50803_15918 | Giardia Assemblage A isolate WB | hypothetical protein | genomic | GLCHR05 reverse | (geneStart-200 to geneCodeStart+0)| length=201
GL50803_17547 | Giardia Assemblage A isolate WB | Ribosomal protein L4 | genomic | GLCHR05 reverse | (geneStart-200 to geneCodeStart+0)| length=201
GL50803_111967 | Giardia Assemblage A isolate WB | Protein 21.1 | genomic | GLCHR05 forward | (geneStart-200 to geneCodeStart+0)| length=201
GL50803_31978 | Giardia Assemblage A isolate WB | hypothetical protein | genomic | GLCHR05 reverse | (geneStart-200 to geneCodeStart+0)| length=201
GL50803_6559 | Giardia Assemblage A isolate WB | hypothetical protein | genomic | GLCHR05 forward | (geneStart-200 to geneCodeStart+0)| length=201
GL50803_14241 | Giardia Assemblage A isolate WB | hypothetical protein | genomic | GLCHR05 reverse | (geneStart-200 to geneCodeStart+0)| length=201
GL50803_7579 | Giardia Assemblage A isolate WB | Kinase, NEK-frag | genomic | GLCHR05 forward | (geneStart-200 to geneCodeStart+0)| length=201

## Sheet: B. Myb2 sites in orthologs
7 hours						10.5 hours						14 hours
WB	P15	GS	Muris			WB	P15	GS	Muris			WB	P15	GS	Muris
GL50803_2116	GLP15_4016	GSB_153481	GMRT_14097			GL50803_2116	GLP15_4016	GSB_153481	GMRT_14097			GL50803_2116	GLP15_4016	GSB_153481	GMRT_14097
GL50803_8722	GLP15_3012 (2)	GSB_153231 (2)	GMRT_11489	GMRT_13230	GMRT_12299	GL50803_113610	GLP15_4326 (2)	GSB_153352	GMRT_10834			GL50803_113610	GLP15_4326 (2)	GSB_153352	GMRT_10834
GL50803_33672	GLP15_611 (2)	GSB_33672 (2)	GMRT_12056			GL50803_9046	GLP15_1158	GSB_9046	GMRT_13422			GL50803_14833	GLP15_3957	GL50581_2718	GMRT_14189
GL50803_15026	GLP15_4618	GSB_15026	GMRT_11251			GL50803_14845	GLP15_1157	GSB_14845	GMRT_10149			GL50803_17560	GLP15_2685	GSB_153162
GL50803_14259	GLP15_403	GSB_14259	GMRT_12407 (4)	GMRT_23234		GL50803_8722	GLP15_3012 (2)	GSB_153231 (2)	GMRT_11489	GMRT_13230	GMRT_12299	GL50803_9046	GLP15_1158	GSB_9046	GMRT_13422
GL50803_5638	GLP15_689	GSB_5638	GMRT_10774 (3)			GL50803_103883	GLP15_5163 (2)	GSB_151058	GMRT_12667			GL50803_14845	GLP15_1157	GSB_14845	GMRT_10149
GL50803_137701						GL50803_33672	GLP15_611 (2)	GSB_33672 (2)	GMRT_12056			GL50803_4341	GLP15_2905	GSB_151799 (2)
GL50803_9327						GL50803_8860	GLP15_5187					GL50803_8722	GLP15_3012 (2)	GSB_153231 (2)	GMRT_11489	GMRT_13230	GMRT_12299
GL50803_2421	GLP15_4965 (2)	GSB_152246				GL50803_14259	GLP15_403	GSB_14259	GMRT_12407 (4)	GMRT_23234		GL50803_103883	GLP15_5163 (2)	GSB_151058	GMRT_12667
GL50803_88581 (2)	GLP15_31 (3)	GSB_88581 (2)	GMRT_10283			GL50803_2861	GLP15_699	GSB_150099	GMRT_21448 (3)			GL50803_33672	GLP15_611 (2)	GSB_33672 (2)	GMRT_12056
GL50803_5435	GLP15_689	GSB_5435 (2)	GMRT_10774			GL50803_5638	GLP15_689	GSB_5638	GMRT_10774 (3)			GL50803_15497	GLP15_5110	GSB_150700
GL50803_12082	GLP15_2297 (2)	GSB_150388 (2)	GMRT_13369			GL50803_21924						GL50803_14381	GLP15_2863	GSB_14381
GL50803_14164	GLP15_1239	GSB_151208 (2)				GL50803_10148	GLP15_668	GSB_151455	GMRT_12700			GL50803_16950	GLP15_743	GSB_151919
GL50803_16069	GLP15_1937	GSB_16069 (3)	GMRT_11676			GL50803_114495						GL50803_5206	GLP15_2362	GSB_152921
GL50803_9132	GLP15_1601	GSB_152987 (2)				GL50803_137701						GL50803_10605	GLP15_1539	GSB_154083 (2)	GMRT_16095
						GL50803_9327						GL50803_4846	GLP15_707	GSB_150095
15 genes	12 / 13 genes	11 / 13 genes	4 / 10 genes			GL50803_137745	GLP15_2722	GSB_153922	GMRT_13407			GL50803_102071	GLP15_2851 (2)	GSB_151237 (3)
						GL50803_9665	GLP15_3141	GSB_152506 (2)	GMRT_10991			GL50803_8860	GLP15_5187
7 hours (no motif in WB)						GL50803_5274	GLP15_1012	GSB_150010	GMRT_13603 (3)			GL50803_31530	GLP15_2646	GSB_31530	GMRT_20239
						GL50803_2421	GLP15_4965 (2)	GSB_152246				GL50803_15026	GLP15_4618	GSB_15026	GMRT_11251
WB	P15	GS	Muris			GL50803_88581	GLP15_31 (3)	GSB_88581 (2)	GMRT_10283			GL50803_23439	GLP15_1971	GSB_23439	GMRT_10318
GL50803_17120	GLP15_3291	GSB_17120	GMRT_16219			GL50803_8987	GLP15_1581	GSB_8987	GMRT_11117			GL50803_16228	GLP15_3976	GSB_16228	GMRT_10080	GMRT_15360
GL50803_12905	GLP15_4017	GSB_153482				GL50803_14759	GLP15_1044 (3)	GSB_14759	GMRT_15068			GL50803_113021	GLP15_184 (2)	GSB_113021 (2)	GMRT_12243
GL50803_1470						GL50803_5435	GLP15_689	GSB_5435 (2)	GMRT_10774			GL50803_14259	GLP15_403	GSB_14259	GMRT_12407 (4)	GMRT_23234
GL50803_9352	GLP15_2621	GSB_153766	GMRT_15279			GL50803_7982	GLP15_4908	GSB_7982	GMRT_13794			GL50803_15521	GLP15_2046	GSB_150283
GL50803_6082	GLP15_4927	GSB_152751				GL50803_7134	GLP15_1869	GSB_151829	GMRT_12516			GL50803_26917	GLP15_477	GSB_150850	GMRT_15985
GL50803_113565	GLP15_1378	GSB_153075				GL50803_8245	GLP15_207	GSB_10829	GMRT_10591			GL50803_8210	GLP15_942 (2)	GSB_8210 (2)	GMRT_11372
						GL50803_12082	GLP15_2297 (2)	GSB_150388 (2)	GMRT_13369			GL50803_11443	GLP15_544	GSB_150903	GMRT_14380
6 genes	2 / 5 genes	1 / 5 genes	0 / 2 genes			GL50803_20593	GLP15_307	GSB_20593	GMRT_10762			GL50803_14313	GLP15_4859	GSB_151655
						GL50803_21485	GLP15_2247	GSB_151715	GMRT_11671			GL50803_2861	GLP15_699	GSB_150099	GMRT_21448 (3)
						GL50803_14164	GLP15_1239	GSB_151208 (2)				GL50803_2692	GLP15_1496 (2)	GSB_151866	GMRT_10162	GMRT_11017
						GL50803_3180	GLP15_5222	GSB_151009	GMRT_14079			GL50803_90575	GLP15_924	GSB_153041	GMRT_14180
						GL50803_6288	GLP15_3561	GSB_152325	GMRT_10030			GL50803_5638	GLP15_689	GSB_5638	GMRT_10774 (3)
						GL50803_27028	GLP15_1927	GSB_27028				GL50803_5987	GLP15_3885 (3)	GSB_152444	GMRT_13780
						GL50803_32657	GLP15_1300	GSB_32657	GMRT_15330			GL50803_21924
						GL50803_16069	GLP15_1937	GSB_16069 (3)	GMRT_11676			GL50803_112553
						GL50803_14626	GLP15_4650 (2)	GSB_152941 (3)	GMRT_15542			GL50803_8074	GLP15_610	GSB_8074 (3)	GMRT_12057	GMRT_23235 (3)
						GL50803_8771	GLP15_751	GL50581_2690	GMRT_12295	GMRT_15493	GMRT_15568	GL50803_10148	GLP15_668	GSB_151455	GMRT_12700
						GL50803_103935	GLP15_3930	GSB_150473	GMRT_14303			GL50803_137701
						GL50803_7512	GLP15_4298	GSB_153372 (2)	GMRT_14408			GL50803_114495
						GL50803_9132	GLP15_1601	GSB_152987 (2)				GL50803_15279	GLP15_3937	GSB_150478 (4)	GMRT_14295
												GL50803_29744
						41 genes	31 / 37 genes	25 / 36 genes	11 / 32 genes			GL50803_8359	GLP15_808	GSB_8359 (2)	GMRT_12742	GMRT_13003
												GL50803_21232	GLP15_1172	GSB_153410 (2)
						10.5 hours (no motif in WB)						GL50803_9327
						WB	P15	GS	Muris			GL50803_221691	GLP15_2575	GSB_150181
						GL50803_17120	GLP15_3291	GSB_17120	GMRT_16219			GL50803_3063	GLP15_3573 (2)	GSB_3063 (2)	GMRT_10038 (2)	GMRT_13341
						GL50803_11642	GLP15_1728	GSB_152827	GMRT_11770			GL50803_9665	GLP15_3141	GSB_152506 (2)	GMRT_10991
						GL50803_2897	GLP15_3931	GSB_2897	GMRT_14302			GL50803_5274	GLP15_1012	GSB_150010	GMRT_13603 (3)
						GL50803_11690	GLP15_3633	GSB_11690				GL50803_137745	GLP15_2722	GSB_153922	GMRT_13407
						GL50803_7374	GLP15_5155	GSB_7374	GMRT_12189	GMRT_14034 (2)		GL50803_2421	GLP15_4965 (2)	GSB_152246
						GL50803_40376	GLP15_486 (2)	GSB_40376 (2)				GL50803_8987	GLP15_1581	GSB_8987	GMRT_11117
						GL50803_16217	GLP15_2123	GSB_16217	GMRT_15202			GL50803_14926	GLP15_5000
						GL50803_28112	GLP15_2867	GSB_153593				GL50803_88581	GLP15_31 (3)	GSB_88581 (2)	GMRT_10283
						GL50803_12905	GLP15_4017	GSB_153482				GL50803_14374	GLP15_1863 (2)	GSB_14374 (2)	GMRT_12519
						GL50803_1470						GL50803_14759	GLP15_1044 (3)	GSB_14759	GMRT_15068
						GL50803_112696						GL50803_5435	GLP15_689	GSB_5435 (2)	GMRT_10774
						GL50803_9352	GLP15_2621	GSB_153766	GMRT_15279			GL50803_8245	GLP15_207	GSB_10829	GMRT_10591
						GL50803_3279	GLP15_684	GSB_3279	GMRT_10770			GL50803_7134	GLP15_1869	GSB_151829	GMRT_12516
						GL50803_7797	GLP15_899	GSB_7797	GMRT_10918			GL50803_7982	GLP15_4908	GSB_7982	GMRT_13794
						GL50803_114829	GLP15_4019	GSB_153484	GMRT_13149			GL50803_12082	GLP15_2297 (2)	GSB_150388 (2)	GMRT_13369
						GL50803_112295	GLP15_3030	GSB_153242	GMRT_10490			GL50803_20593	GLP15_307	GSB_20593	GMRT_10762
						GL50803_91934	GLP15_1098	GSB_152778	GMRT_11698			GL50803_21485	GLP15_2247	GSB_151715	GMRT_11671
						GL50803_2822	GLP15_3929	GSB_150472				GL50803_14164	GLP15_1239	GSB_151208 (2)
						GL50803_10680	GLP15_1507	GSB_151385				GL50803_3180	GLP15_5222	GSB_151009	GMRT_14079
						GL50803_8377	GLP15_4322	GSB_153356				GL50803_6288	GLP15_3561	GSB_152325	GMRT_10030
						GL50803_11930	GLP15_71	GSB_150734	GMRT_10974			GL50803_29263	GLP15_1284	GSB_150540	GMRT_12590
						GL50803_11050	GLP15_5059	GSB_151808				GL50803_27028	GLP15_1927	GSB_27028
						GL50803_24488	GLP15_1942	GSB_154119				GL50803_32657	GLP15_1300	GSB_32657	GMRT_15330
						GL50803_23630	GLP15_3142	GSB_152505	GMRT_11847			GL50803_16069	GLP15_1937	GSB_16069 (3)	GMRT_11676
						GL50803_2605	GLP15_1103	GSB_2605	GMRT_13851			GL50803_92729	GLP15_536	GSB_92729	GMRT_15811
						GL50803_15594	GLP15_342	GSB_15594	GMRT_11433	GMRT_20538		GL50803_14626	GLP15_4650 (2)	GSB_152941 (3)	GMRT_15542
						GL50803_2118	GLP15_4018	GSB_153483	GMRT_jh010			GL50803_8771	GLP15_751	GL50581_2690	GMRT_12295	GMRT_15493	GMRT_15568
						GL50803_7353	GLP15_1526	GSB_7353	GMRT_10312			GL50803_7512	GLP15_4298	GSB_153372 (2)	GMRT_14408
						GL50803_11174	GLP15_487	GSB_150846				GL50803_103935	GLP15_3930	GSB_150473	GMRT_14303
						GL50803_113565	GLP15_1378	GSB_153075				GL50803_102322	GLP15_1798	GSB_102322	GMRT_11520
						GL50803_16493	GLP15_5206	GSB_151023	GMRT_11037			GL50803_7948	GLP15_3491	GSB_154198	GMRT_13181
						GL50803_23015	GLP15_2116	GSB_150789	GMRT_15193			GL50803_10425	GLP15_886	GSB_10425 (2)	GMRT_13860
						GL50803_5779	GLP15_2025	GSB_153751				GL50803_137748	GLP15_2071	GSB_137748	GMRT_14417
						GL50803_13882	GLP15_1011	GSB_150009				GL50803_14819	GLP15_5217	GSB_151014	GMRT_14035
												GL50803_104087	GLP15_308	GSB_155492	GMRT_10473	GMRT_10761	GMRT_12409
						0 / 34 genes	10 /32 genes	7 / 32 genes	3 / 19 genes			GL50803_9132	GLP15_1601	GSB_152987 (2)
												GL50803_8922	GLP15_1899 (2)	GSB_152727	GMRT_10437	GMRT_11877	GMRT_23323
												83 genes	57 / 77 genes	50 / 75 genes	18 / 58 genes
												14 hours (no motif in WB)
												WB	P15	GS	Muris
												GL50803_17120	GLP15_3291	GSB_17120	GMRT_16219
												GL50803_11642	GLP15_1728	GSB_152827	GMRT_11770
												GL50803_11690	GLP15_3633	GSB_11690
												GL50803_2897	GLP15_3931	GSB_2897	GMRT_14302
												GL50803_7374	GLP15_5155	GSB_7374	GMRT_12189	GMRT_14034 (2)
												GL50803_28112	GLP15_2867	GSB_153593
												GL50803_16217	GLP15_2123	GSB_16217	GMRT_15202
												GL50803_11050	GLP15_5059	GSB_151808
												GL50803_40376	GLP15_486 (2)	GSB_40376 (2)
												GL50803_3279	GLP15_684	GSB_3279	GMRT_10770
												GL50803_1470
												GL50803_12905	GLP15_4017	GSB_153482
												GL50803_9352	GLP15_2621	GSB_153766	GMRT_15279
												GL50803_7598	GLP15_1390	GSB_7598	GMRT_12306
												GL50803_7797	GLP15_899	GSB_7797	GMRT_10918
												GL50803_112696
												GL50803_117192	GLP15_4271		GMRT_12412
												GL50803_6227	GLP15_2459	GSB_6227	GMRT_13359
												GL50803_11110	GLP15_3300	GSB_11110	GMRT_11715
												GL50803_112295	GLP15_3030	GSB_153242	GMRT_10490
												GL50803_60621
												GL50803_60683
												GL50803_24488	GLP15_1942	GSB_154119
												GL50803_2822	GLP15_3929	GSB_150472
												GL50803_14690	GLP15_813	GSB_14690	GMRT_12230	GMRT_14253
												GL50803_13636	GLP15_2990	GSB_151082
												GL50803_24097	GLP15_183 (2)	GL50581_1830	GMRT_11465	GMRT_12256
												GL50803_10680	GLP15_1507	GSB_151385
												GL50803_2605	GLP15_1103	GSB_2605	GMRT_13851
												GL50803_91934	GLP15_1098	GSB_152778	GMRT_11698
												GL50803_11363	GLP15_4565	GSB_150142	GMRT_13392
												GL50803_114829	GLP15_4019	GSB_153484	GMRT_13149
												GL50803_7800	GLP15_902	GSB_150553	GMRT_10833
												GL50803_16622	GLP15_2462	GSB_16622	GMRT_10038 (2)	GMRT_13341
												GL50803_16630	GLP15_2444	GSB_16630	GMRT_13362
												GL50803_15594	GLP15_342	GSB_15594	GMRT_11433	GMRT_20538
												GL50803_8377	GLP15_4322	GSB_153356
												GL50803_27652	GLP15_2211	GSB_152806
												GL50803_11930	GLP15_71	GSB_150734	GMRT_10974
												GL50803_23630	GLP15_3142	GSB_152505	GMRT_11847
												GL50803_111806
												GL50803_14027	GLP15_3455	GSB_150218
												GL50803_94003	GLP15_3762	GSB_94003	GMRT_11005	GMRT_12577
												GL50803_102051		GSB_151131
												GL50803_12066	GLP15_1995	GSB_153692	GMRT_10145
												GL50803_102961	GLP15_2991	GSB_102961	GMRT_16336	GMRT_16338
												GL50803_19631	GLP15_1023	GSB_150015	GMRT_10957
												GL50803_28888	GLP15_5090	GSB_154243	GMRT_10292
												GL50803_7353	GLP15_1526	GSB_7353	GMRT_10312
												GL50803_16493	GLP15_5206	GSB_151023	GMRT_11037
												GL50803_6624	GLP15_402	GSB_152715
												GL50803_14677	GLP15_4450	GSB_14677	GMRT_15546
												GL50803_2118	GLP15_4018	GSB_153483	GMRT_jh010
												GL50803_8263	GLP15_4446	GSB_151557
												GL50803_16861	GLP15_1579	GSB_152836
												GL50803_5742	GLP15_300	GSB_150115	GMRT_10751
												GL50803_7139	GLP15_1864	GSB_7139	GMRT_12518
												GL50803_10758	GLP15_3938	GSB_150479
												GL50803_3731	GLP15_1871	GSB_151827	GMRT_12514
												GL50803_4498	GLP15_2992	GSB_4498	GMRT_13173	GMRT_22298
												GL50803_3855	GLP15_717	GSB_151958
												GL50803_2753	GLP15_389	GSB_152673	GMRT_15241
												GL50803_5779	GLP15_2025	GSB_153751
												GL50803_8357	GLP15_806	GSB_150088
												GL50803_9545	GLP15_1179	GSB_9545	GMRT_12813
												GL50803_13143	GLP15_3928	GSB_13143	GMRT_14305 (2)
												GL50803_11174	GLP15_487	GSB_150846
												GL50803_9900	GLP15_1021	GSB_9900	GMRT_13587
												GL50803_40692	GLP15_2126	GSB_150781	GMRT_15222
												GL50803_96562	GLP15_2442 (2)	GSB_151624	GMRT_13363
												GL50803_8803	GLP15_2119	GSB_150786
												GL50803_23015	GLP15_2116	GSB_150789	GMRT_15193
												GL50803_5425	GLP15_4573	GSB_150136	GMRT_13400
												GL50803_26679	GLP15_3394	GSB_151290	GMRT_10576
												GL50803_93856	GLP15_2227	GSB_151700
												GL50803_16428	GLP15_404	GL50581_3692
												GL50803_17008	GLP15_881	GSB_152789	GMRT_13870
												GL50803_113565	GLP15_1378	GSB_153075
												GL50803_28183	GLP15_5153	GL50581_3489	GMRT_12189	GMRT_14034 (2)
												GL50803_15521	GLP15_2046	GSB_150283
												GL50803_137748	GLP15_2071	GSB_137748	GMRT_14417
												GL50803_4846	GLP15_707	GSB_150095
												GL50803_9048	GLP15_1156	GSB_153706	GMRT_13423
												GL50803_11895	GLP15_2050	GSB_150278	GMRT_11914
												GL50803_15587	GLP15_3034	GSB_15587	GMRT_10280	GMRT_10472
												GL50803_7135	GLP15_1868	GSB_151830
												GL50803_8654	GLP15_2607	GSB_153792
												GL50803_10667	GLP15_3722	GSB_10667	GMRT_10607
												GL50803_95530	GLP15_3458	GSB_150216	GMRT_10884
												GL50803_5820	GLP15_2228	GSB_5820	GMRT_13336
												GL50803_23314	GLP15_1238	GSB_151207	GMRT_12613
												GL50803_8794	GLP15_2124	GSB_150782	GMRT_15203
												GL50803_8145	GLP15_3323	GSB_150987	GMRT_23226
												GL50803_5821	GLP15_2229	GSB_151702	GMRT_13335
												GL50803_14109	GLP15_4928	GSB_14109	GMRT_11417
												GL50803_61453
												GL50803_5536	GLP15_1342	GSB_151743
												GL50803_15013	GLP15_3144	GSB_152504
												GL50803_26379	GLP15_3549	GSB_152329	GMRT_fx022
												GL50803_112875	GLP15_3789	GSB_152288	GMRT_11812	GMRT_22707
												GL50803_5610		GL50581_3434	GMRT_10914
												GL50803_7680		GSB_152862
												GL50803_11499	GLP15_1663	GSB_11499
												GL50803_11752	GLP15_5102	GSB_150693	GMRT_10294
												GL50803_15339	GLP15_3295	GSB_150997
												GL50803_9354	GLP15_2623	GSB_153764	GMRT_10225	GMRT_15273
												GL50803_112938
												GL50803_11245	GLP15_2658	GSB_153147
												GL50803_7514	GLP15_4296	GSB_7514	GMRT_10857
												GL50803_90659	GLP15_4609	GSB_153256
												GL50803_10679	GLP15_1508	GSB_10679	GMRT_15889
												GL50803_11700	GLP15_3626	GSB_150298	GMRT_10475
												GL50803_15268	GLP15_635	GSB_153935	GMRT_14549
												GL50803_14691	GLP15_4323	GSB_153355
												GL50803_23756	GLP15_1009	GSB_23756	GMRT_13604
												GL50803_91504		GL50581_1277	GMRT_13925
												GL50803_17497	GLP15_2298	GSB_150386
												GL50803_12028	GLP15_48	GL50581_3019
												0 / 118 genes	23 / 107 genes	27 / 110 genes	15 / 72 genes
